# Supplementary material for: Genome-wide association studies of five free amino acid levels in rice
Source: Frontiers journal article supplement (doi:10.3389/fpls.2022.1048860), 2022-11-07

Supplementary Figure 1

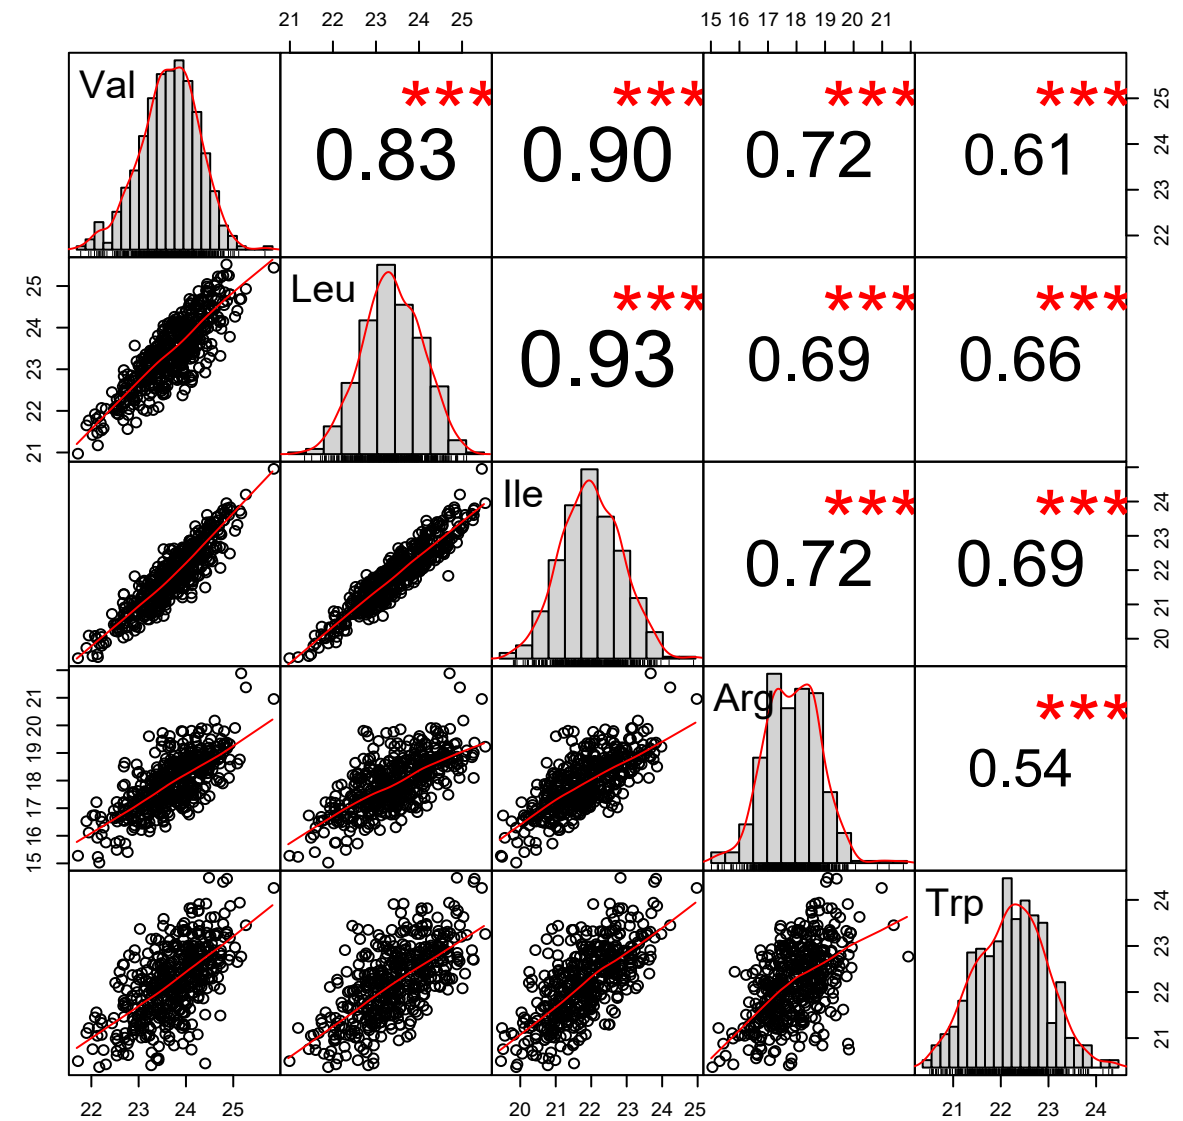

Supplementary Figure 2

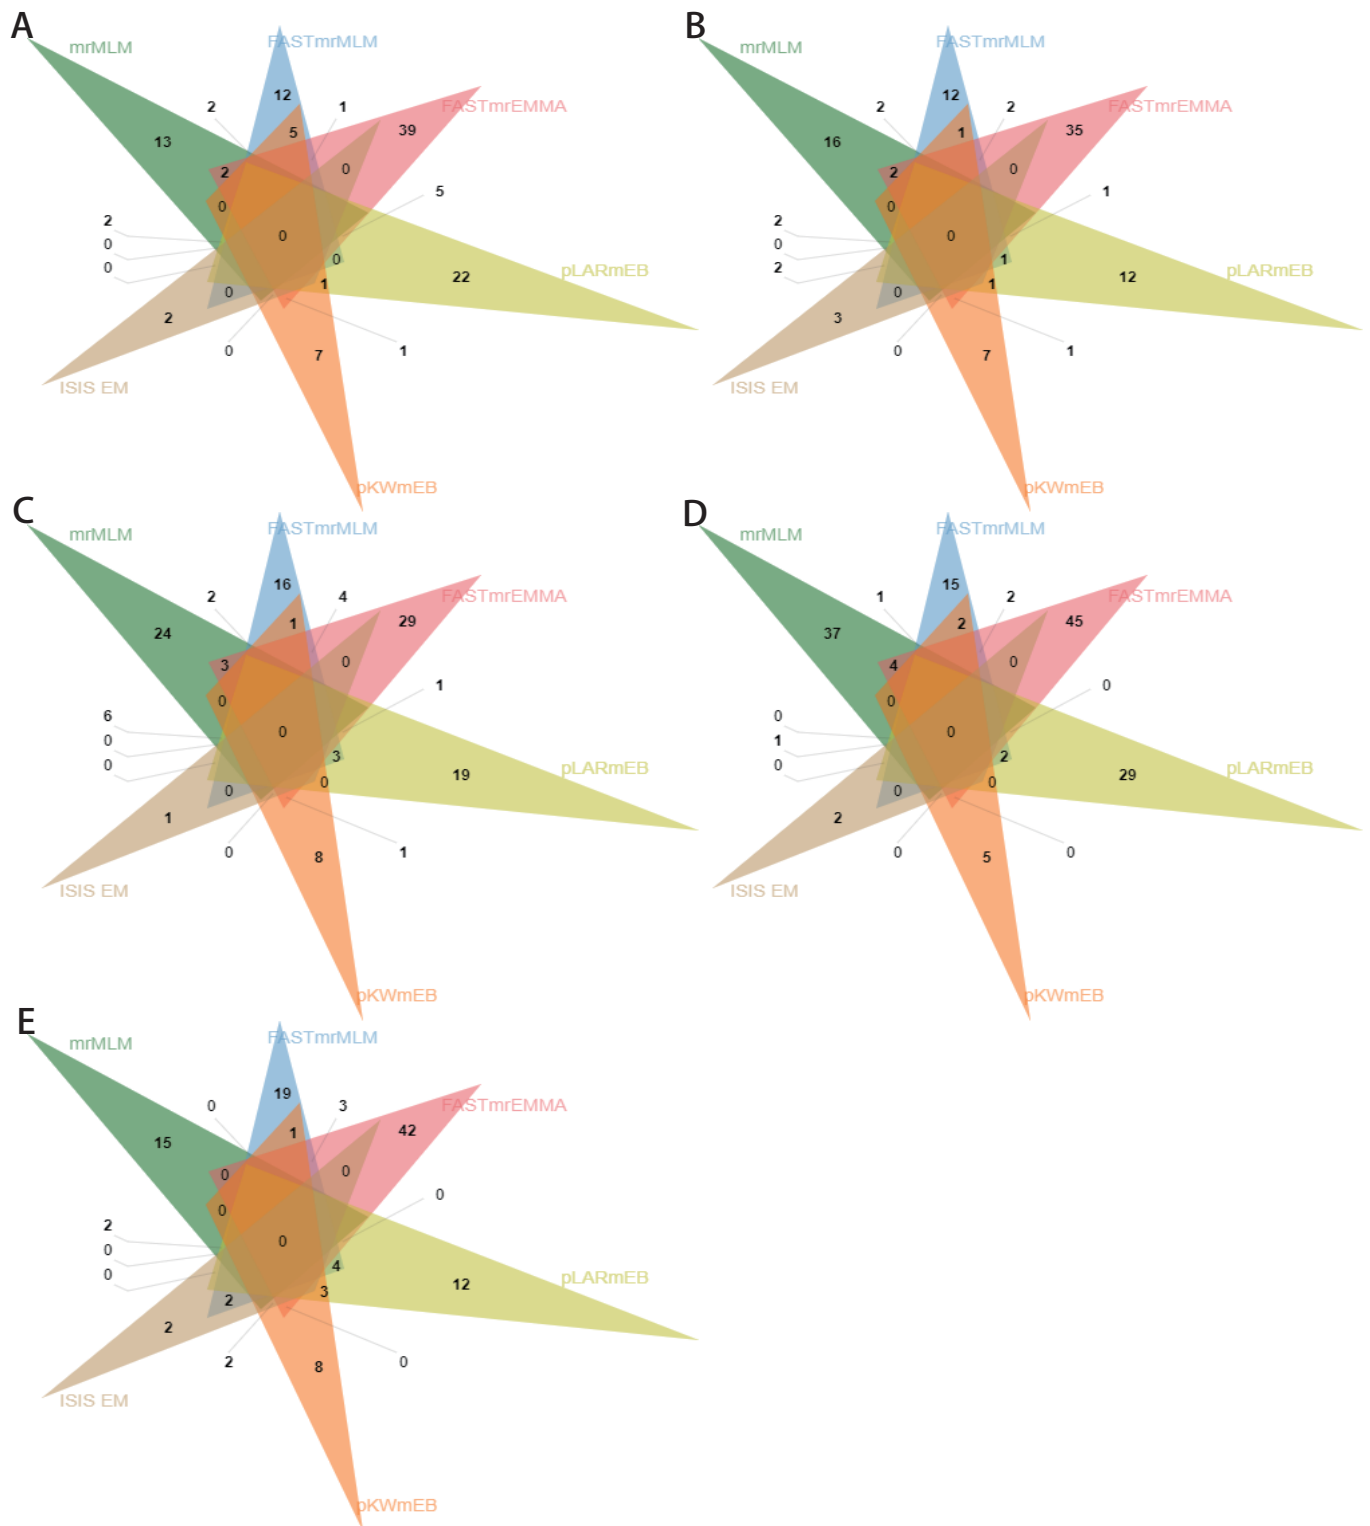

Supplementary Figure 3

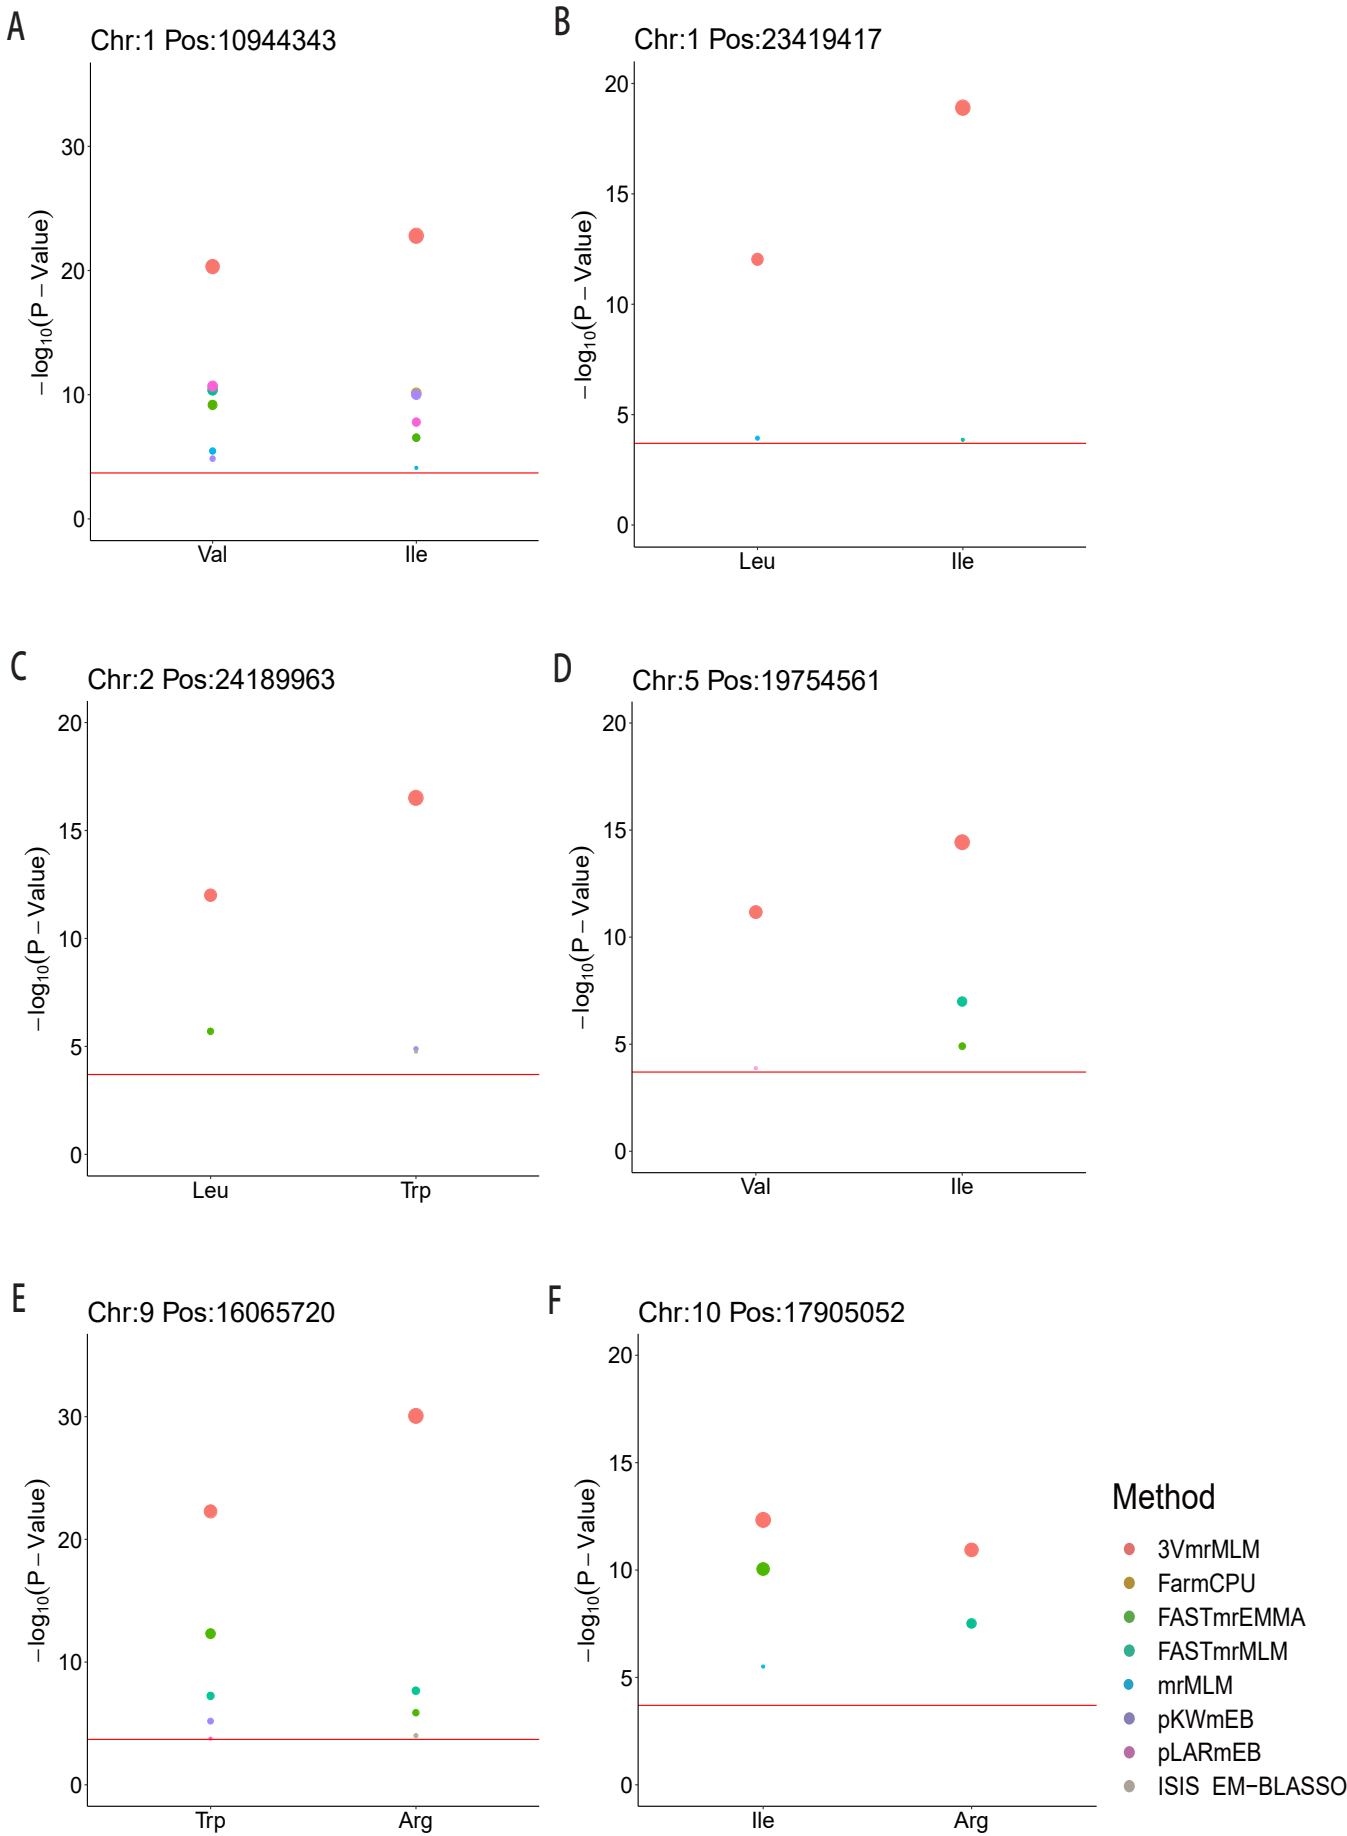

A Supplementary Figure 4

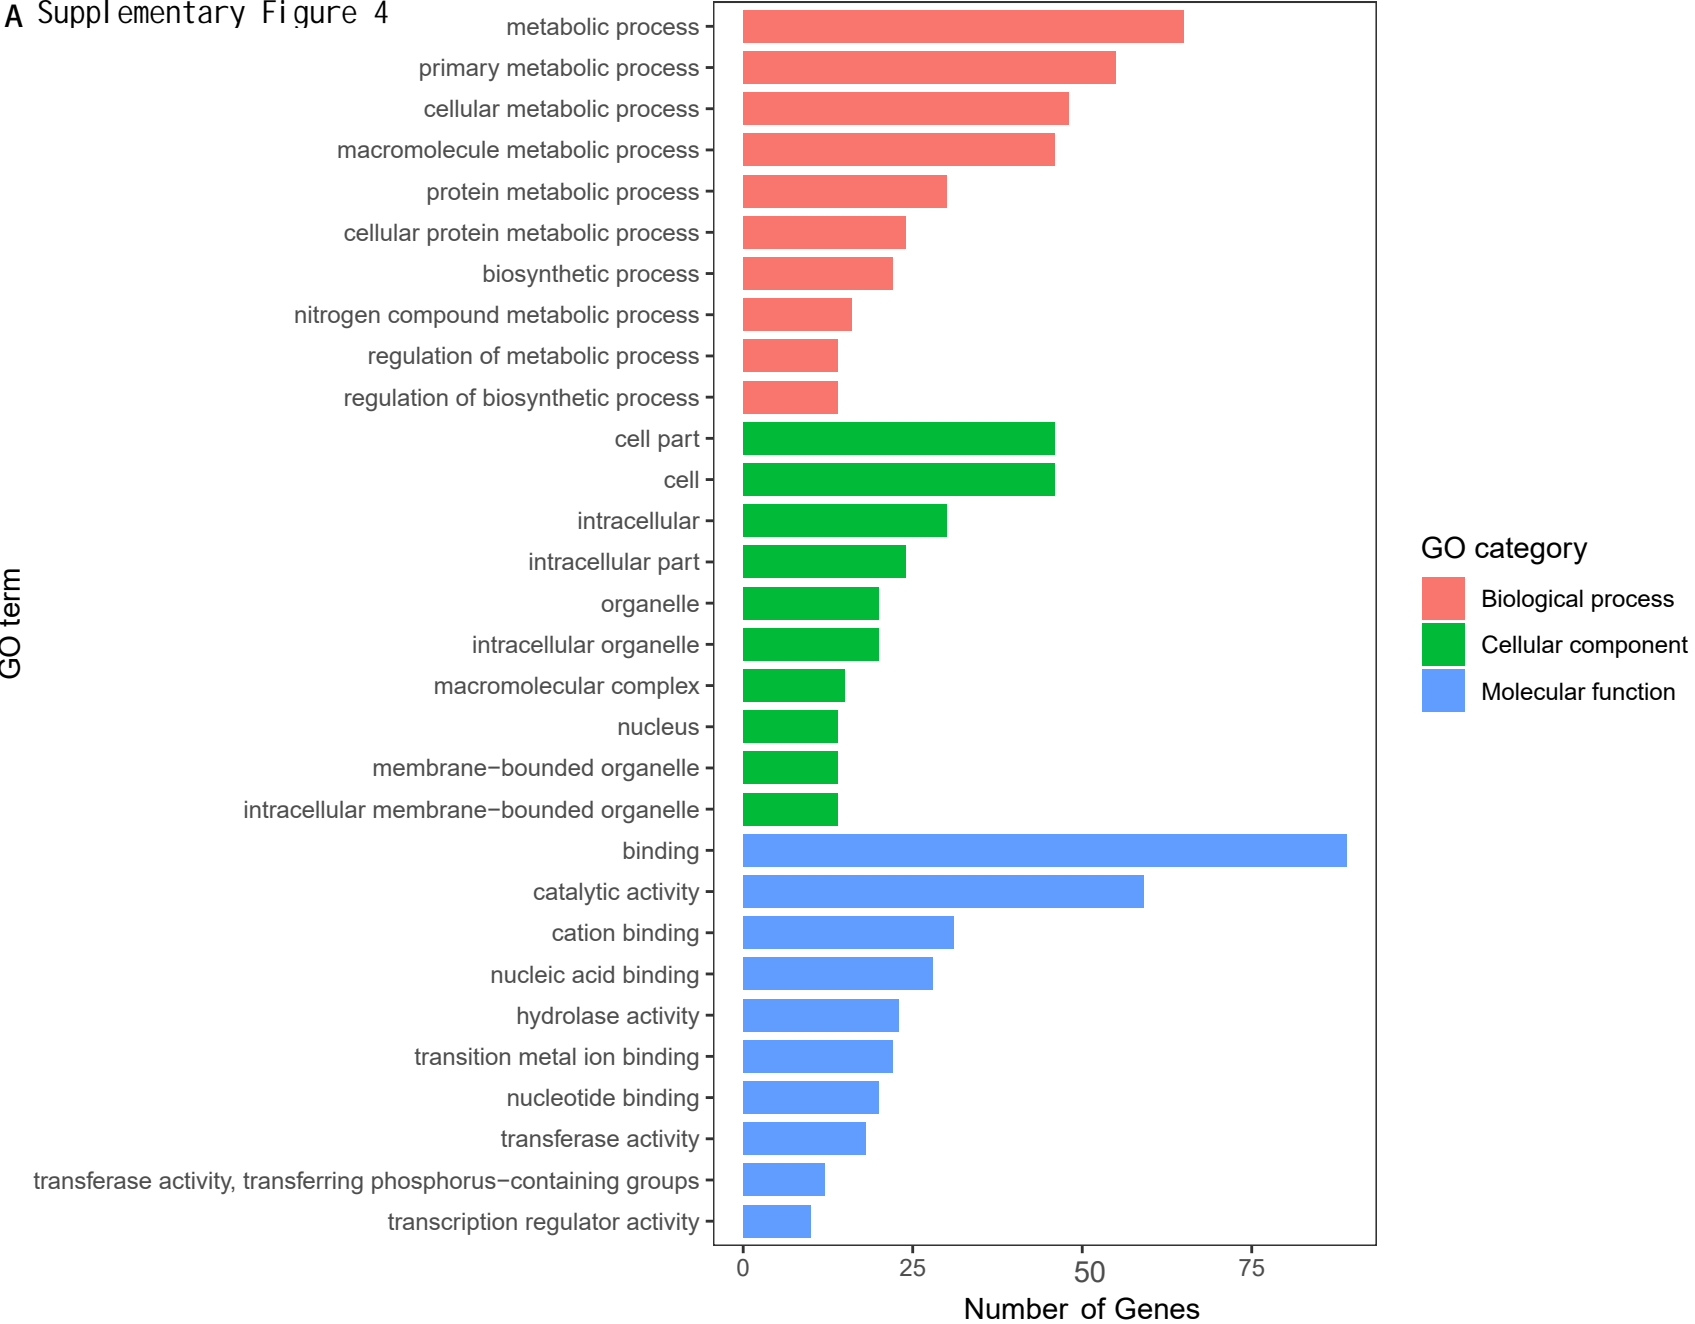

B

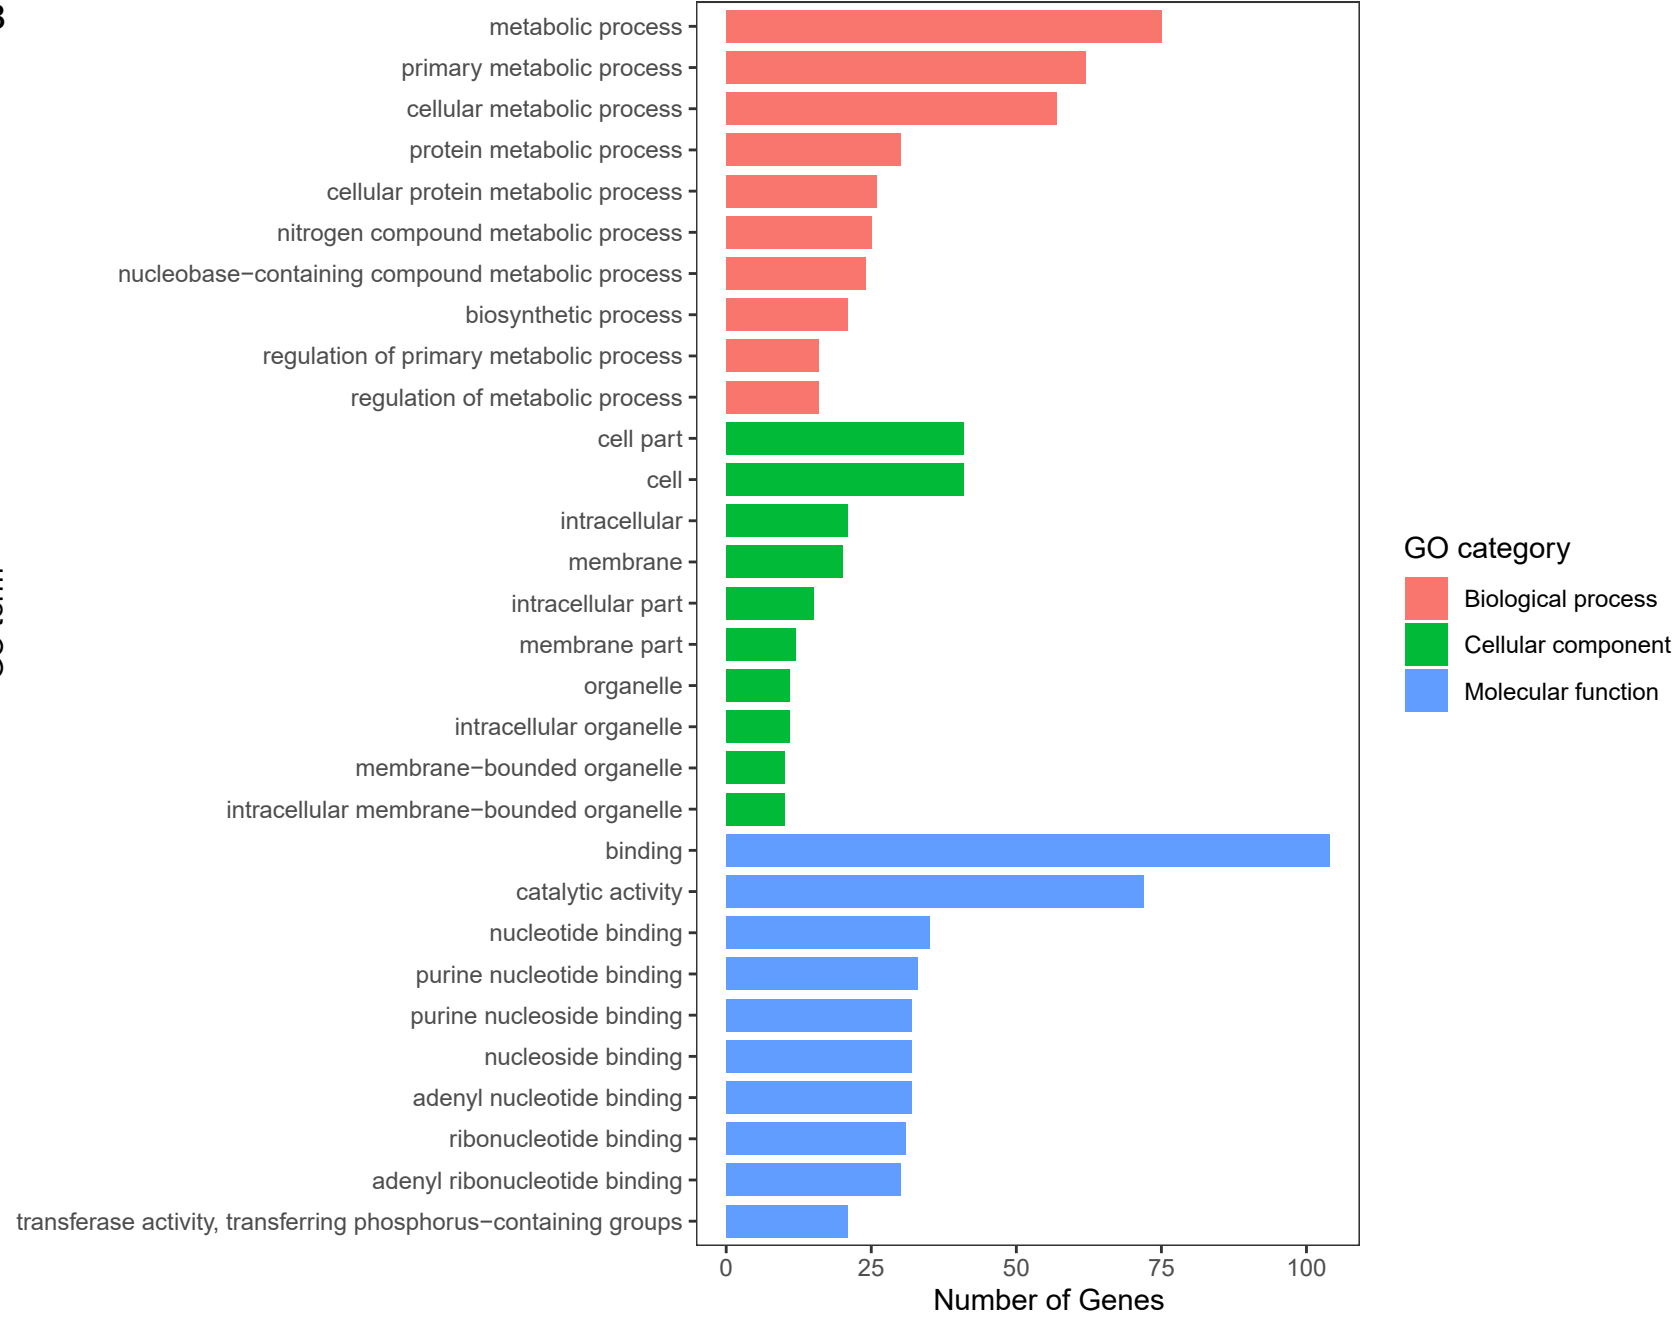

C

GO term

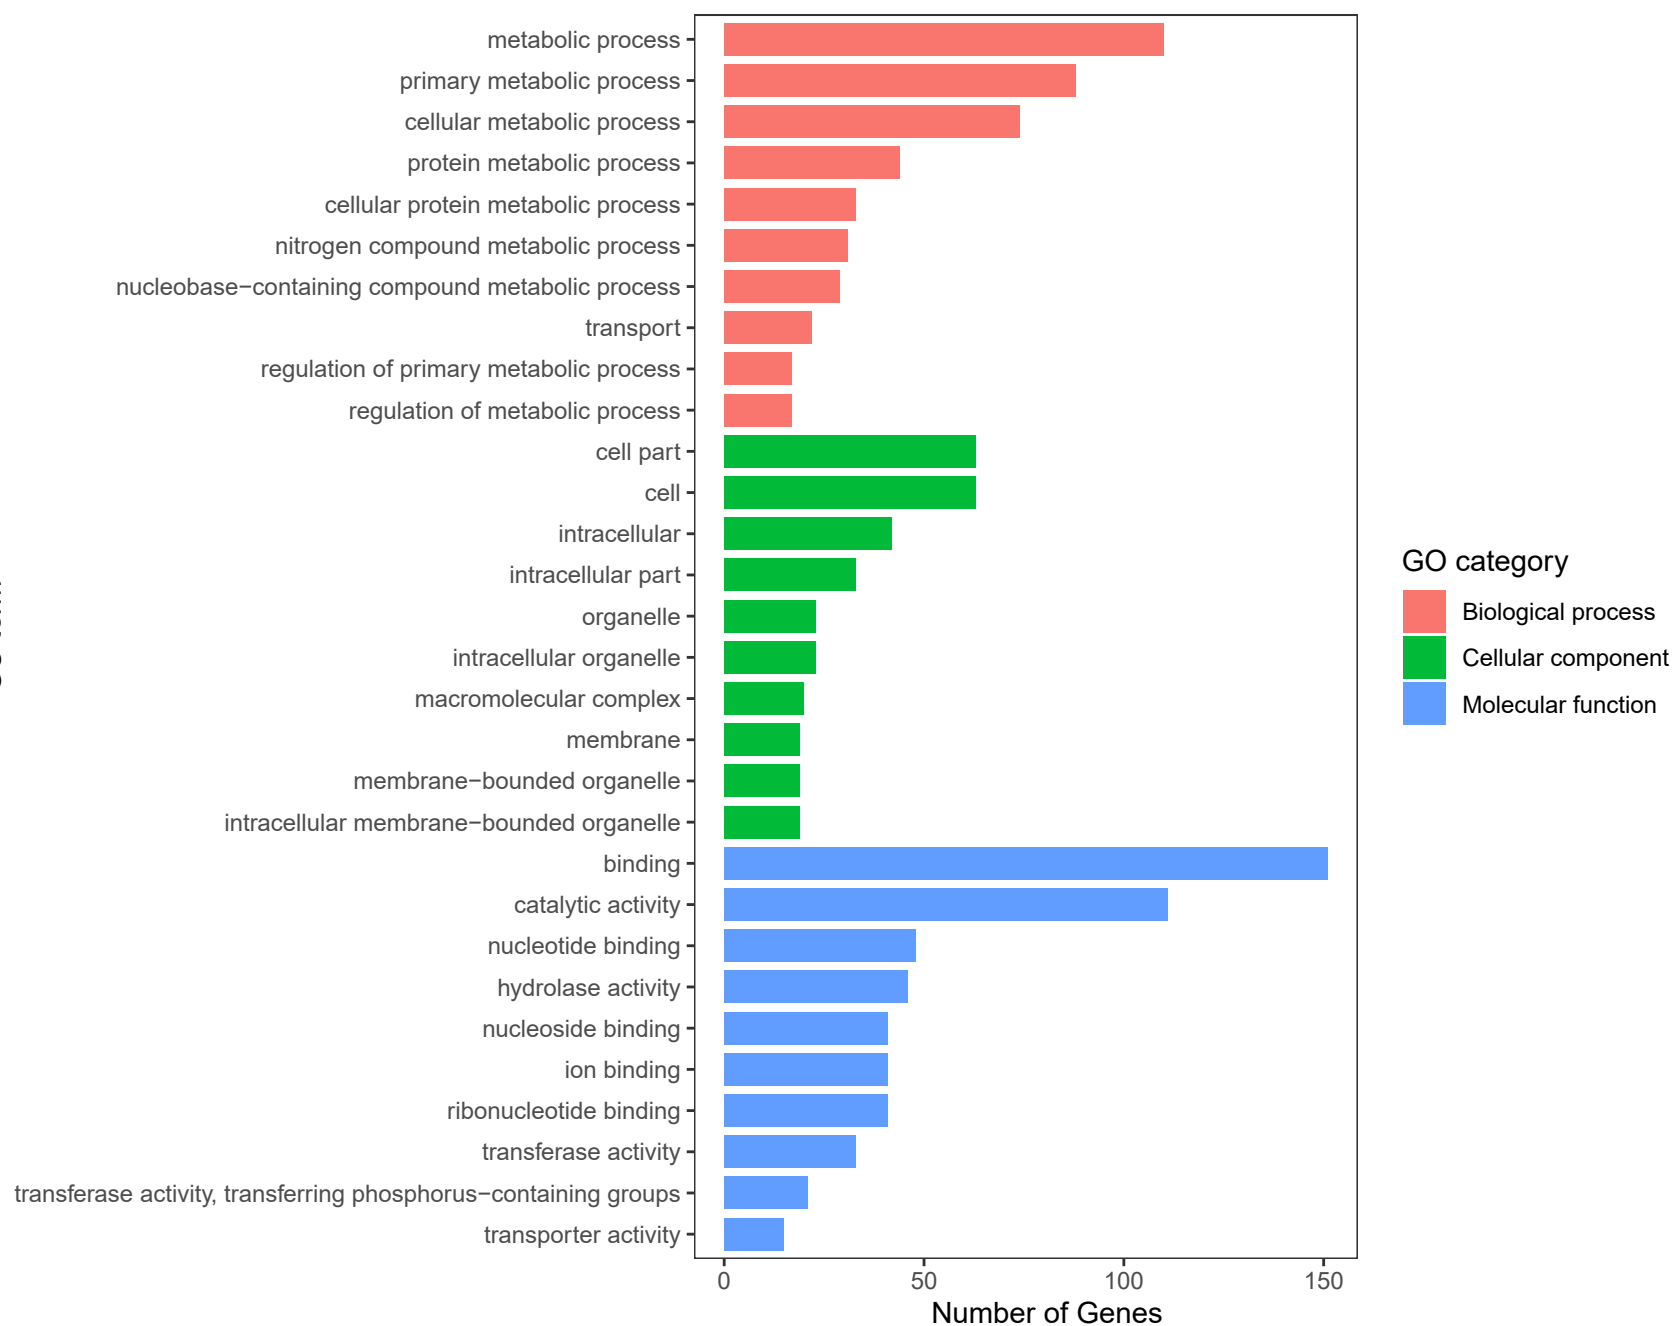

D

GO term

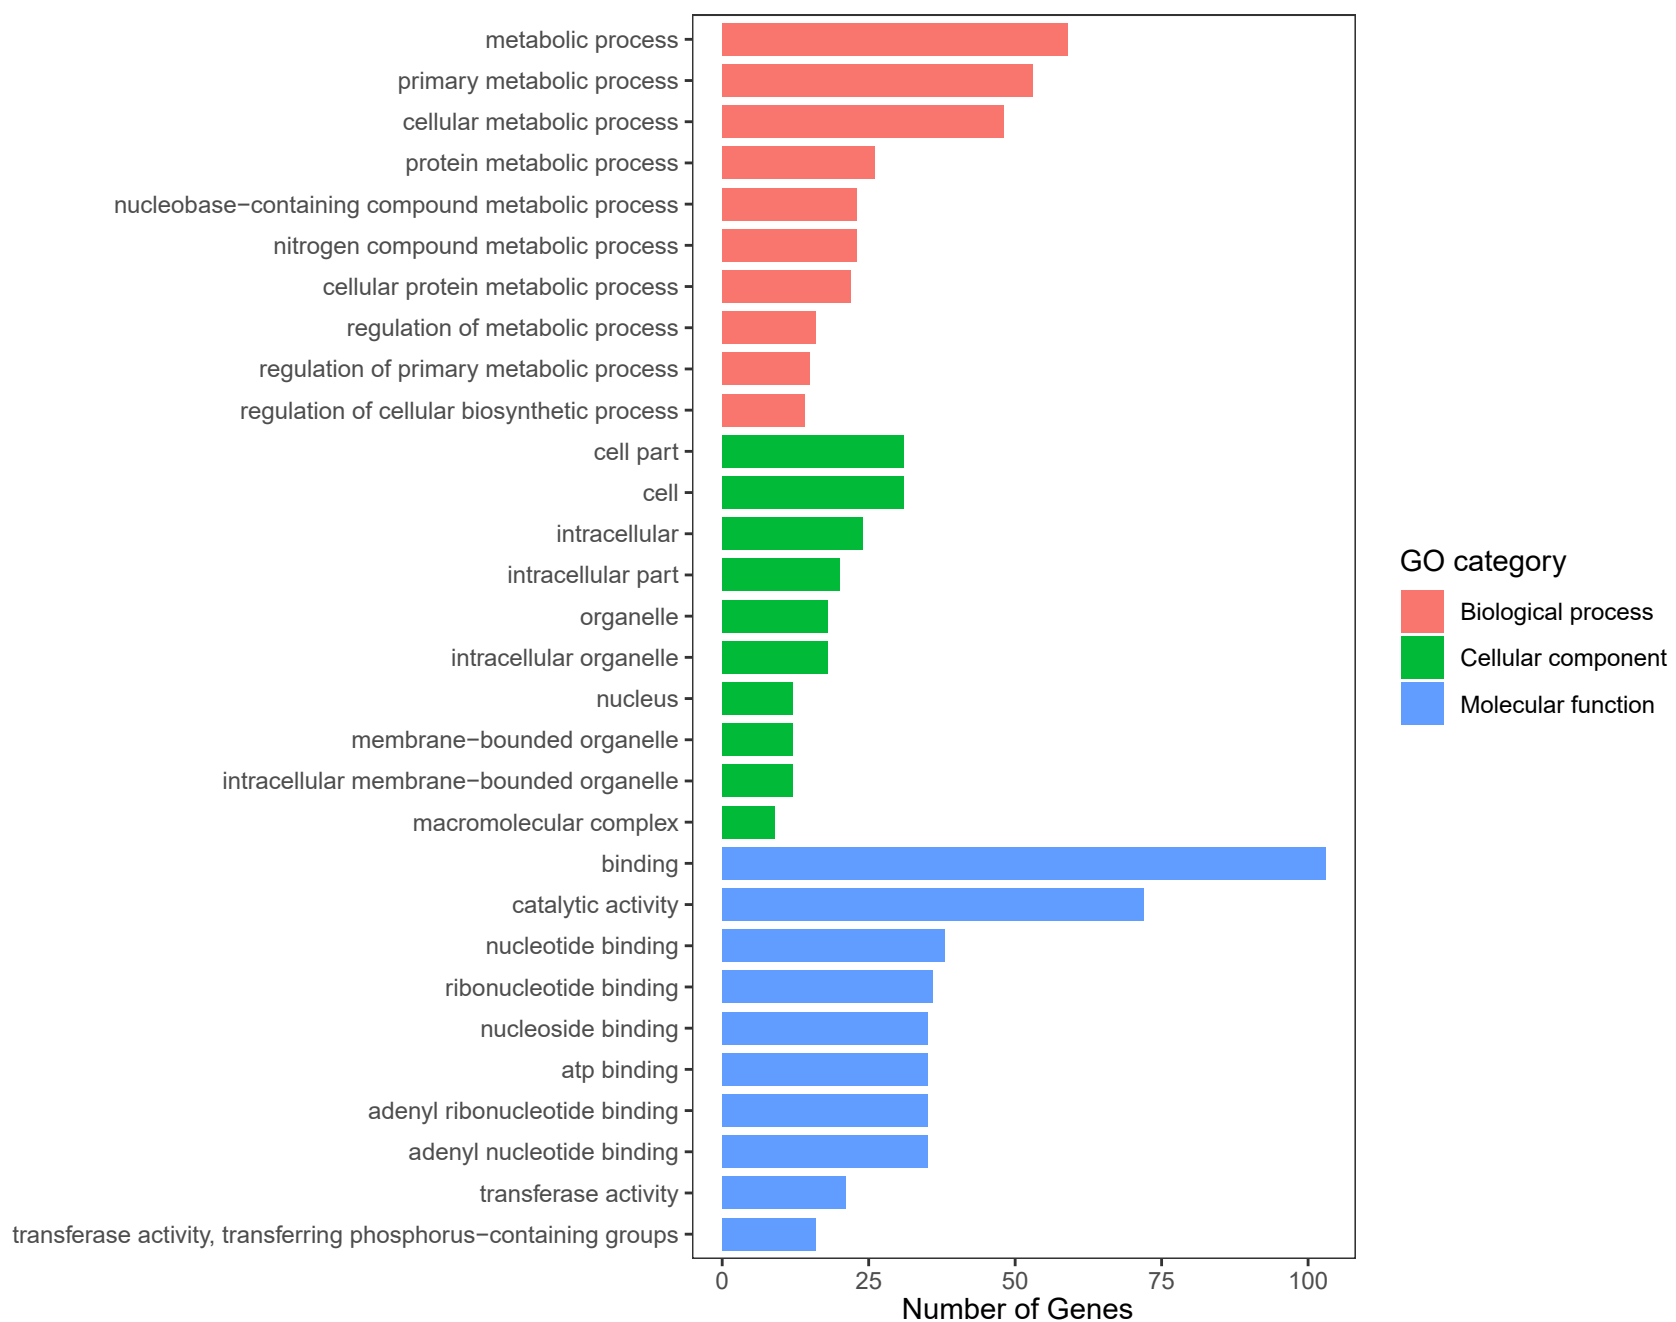

E

GO term

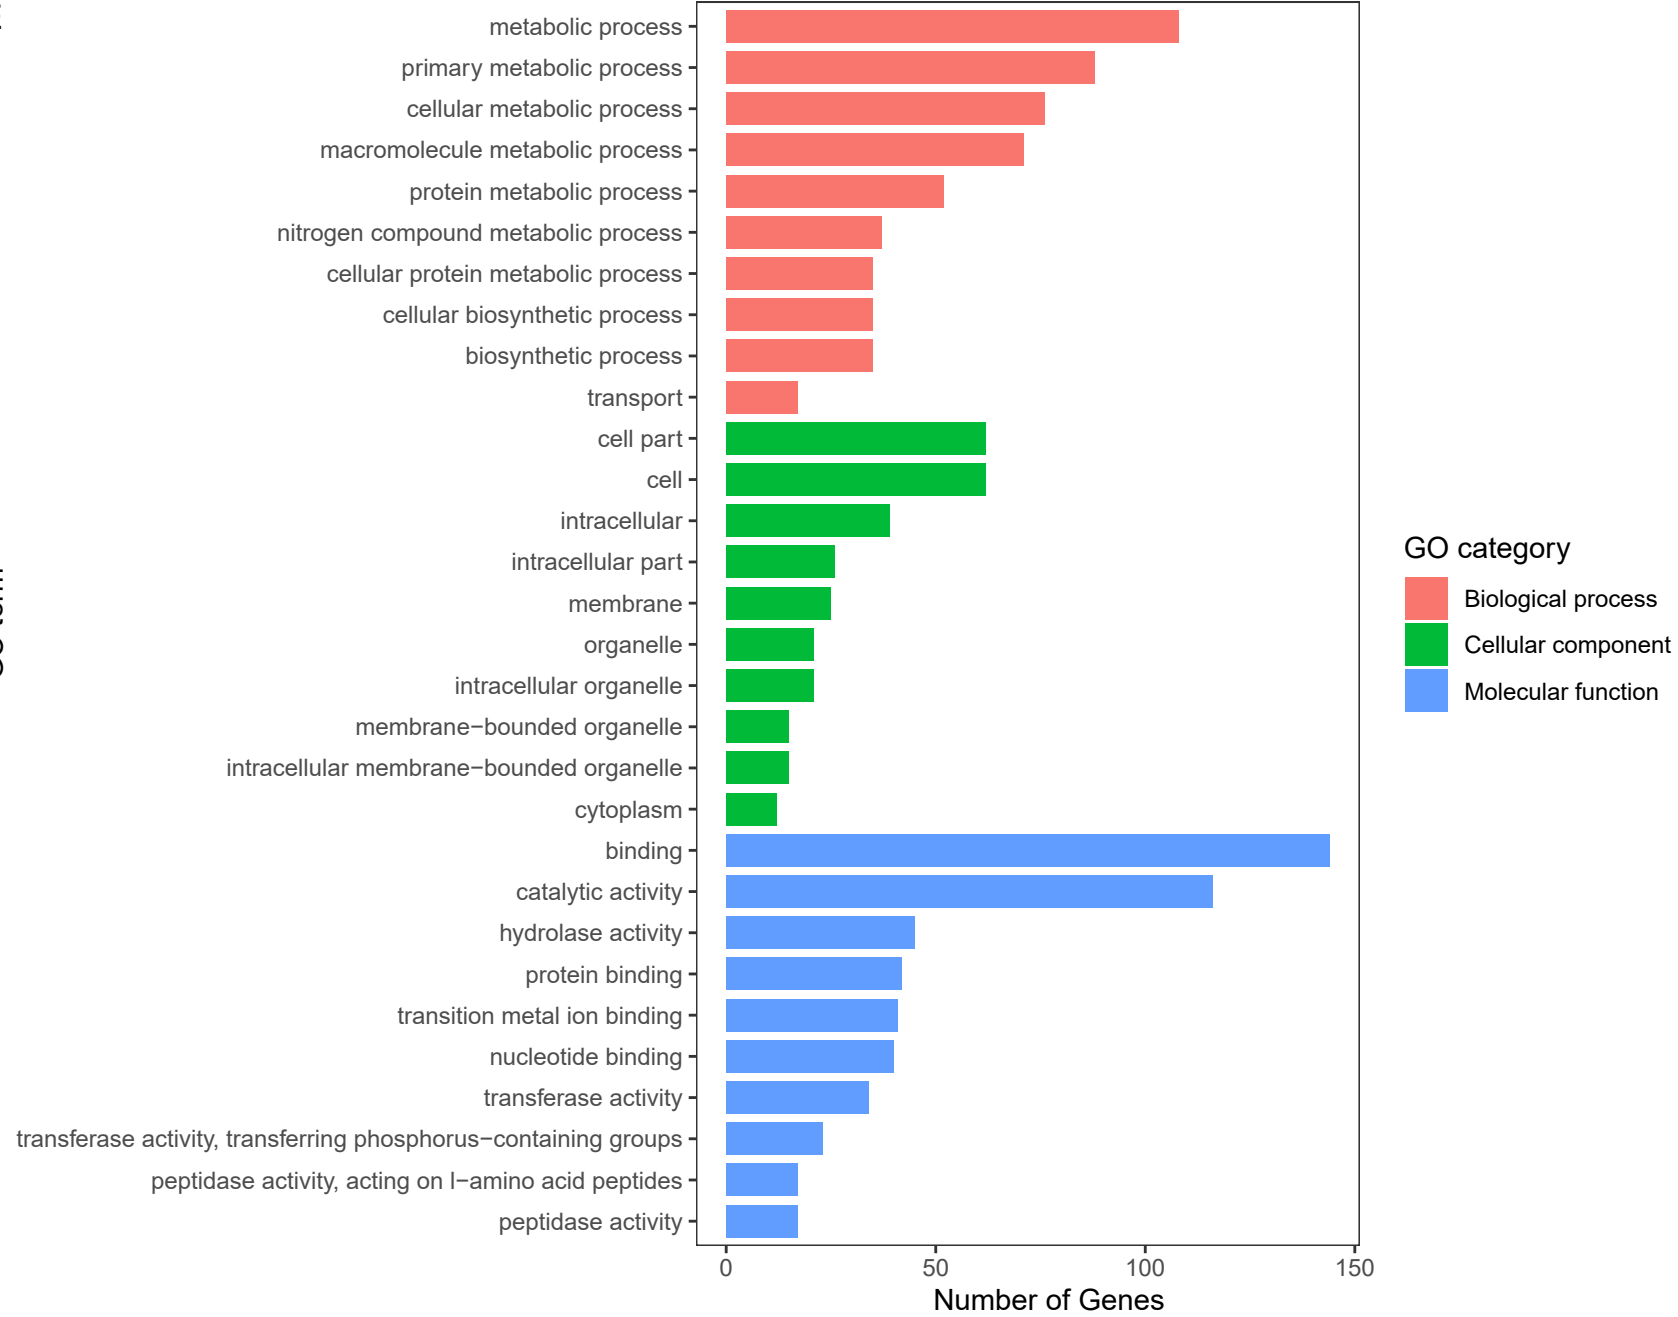



A

KEGG

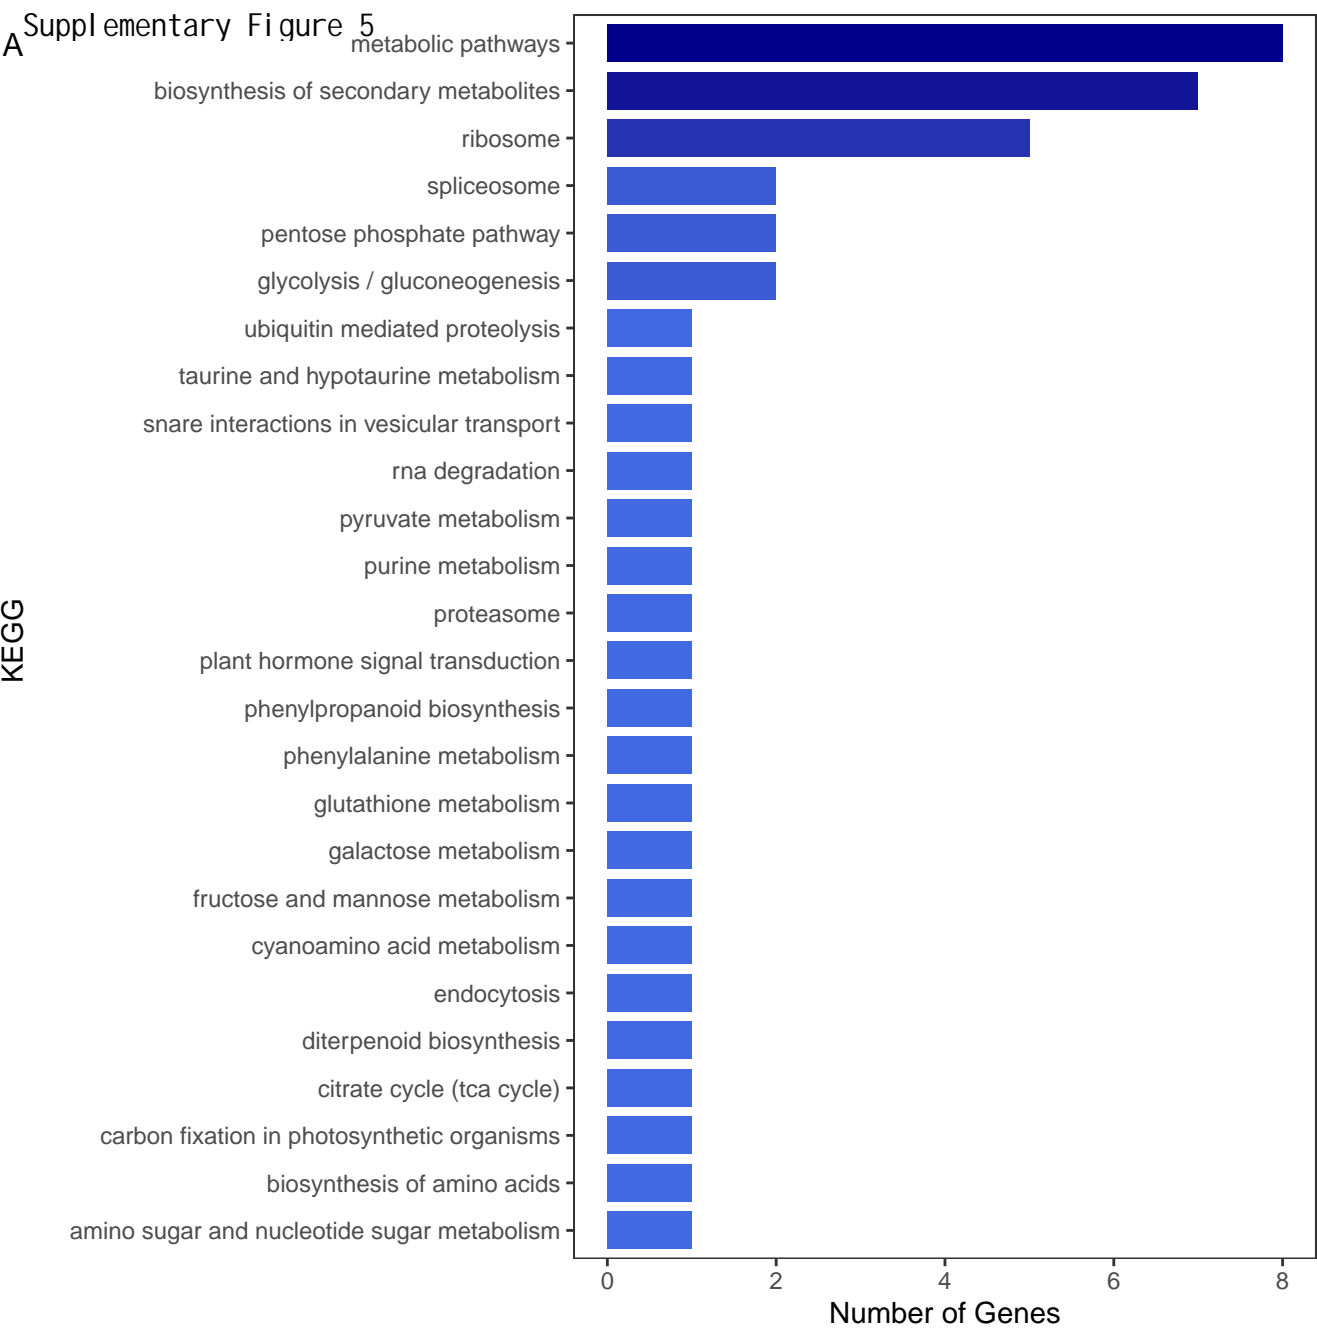

B

KEGG

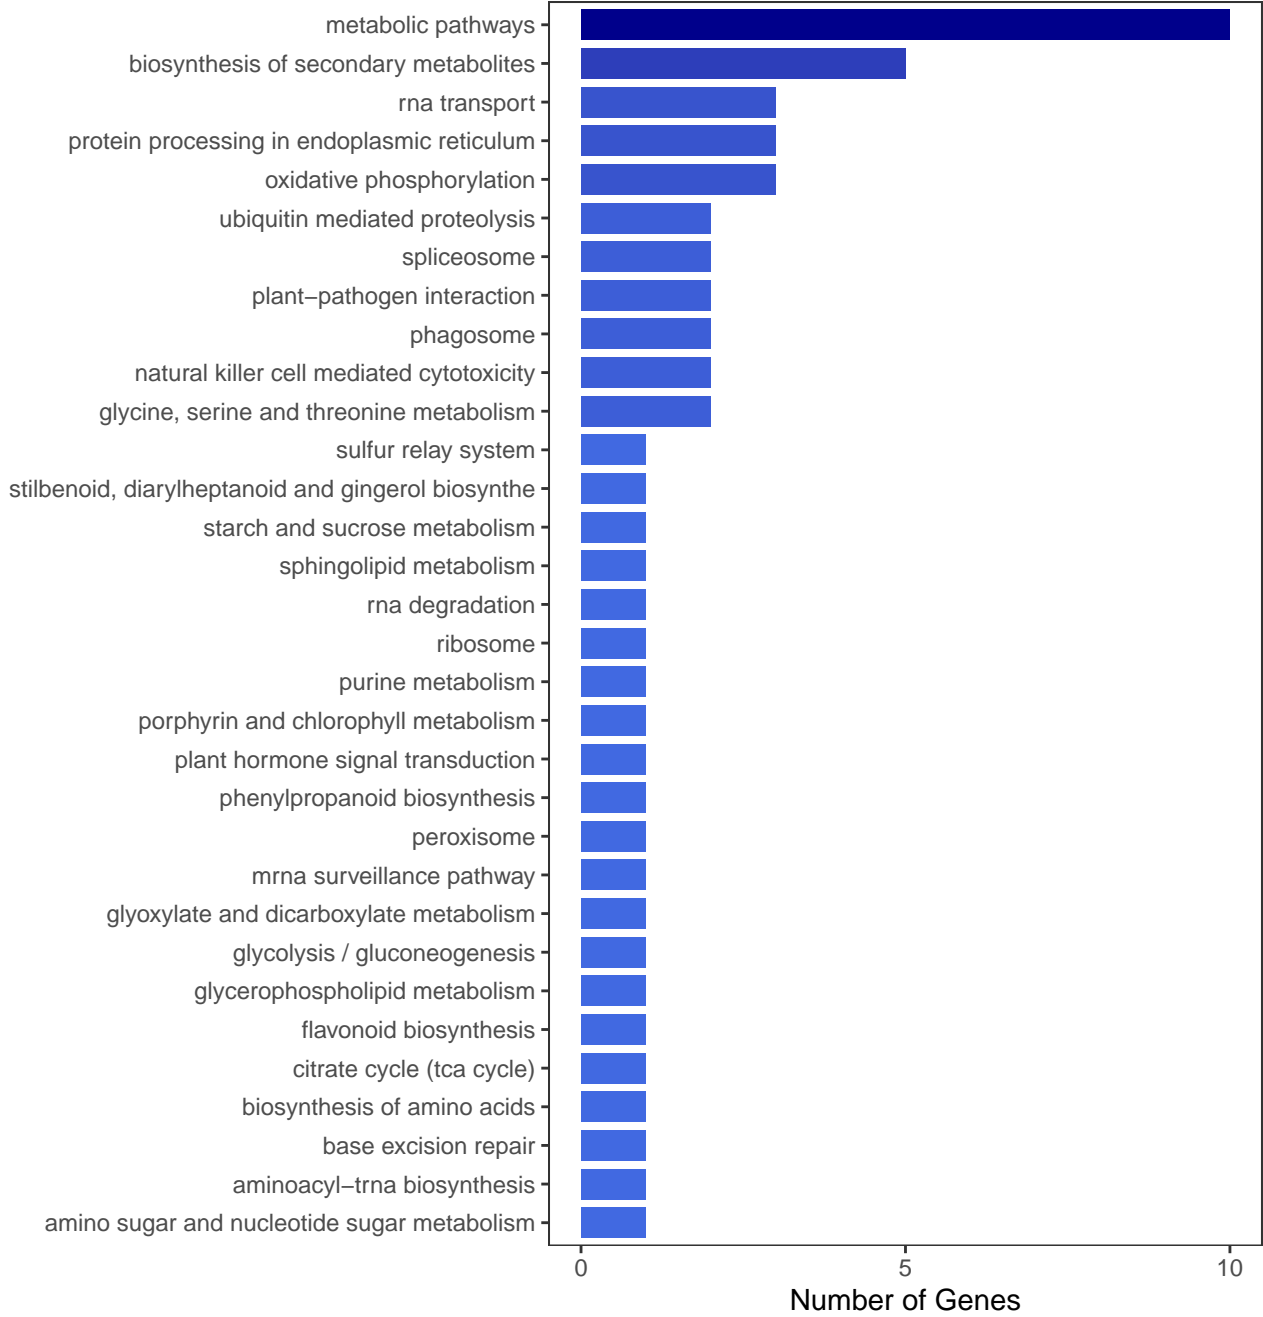

C

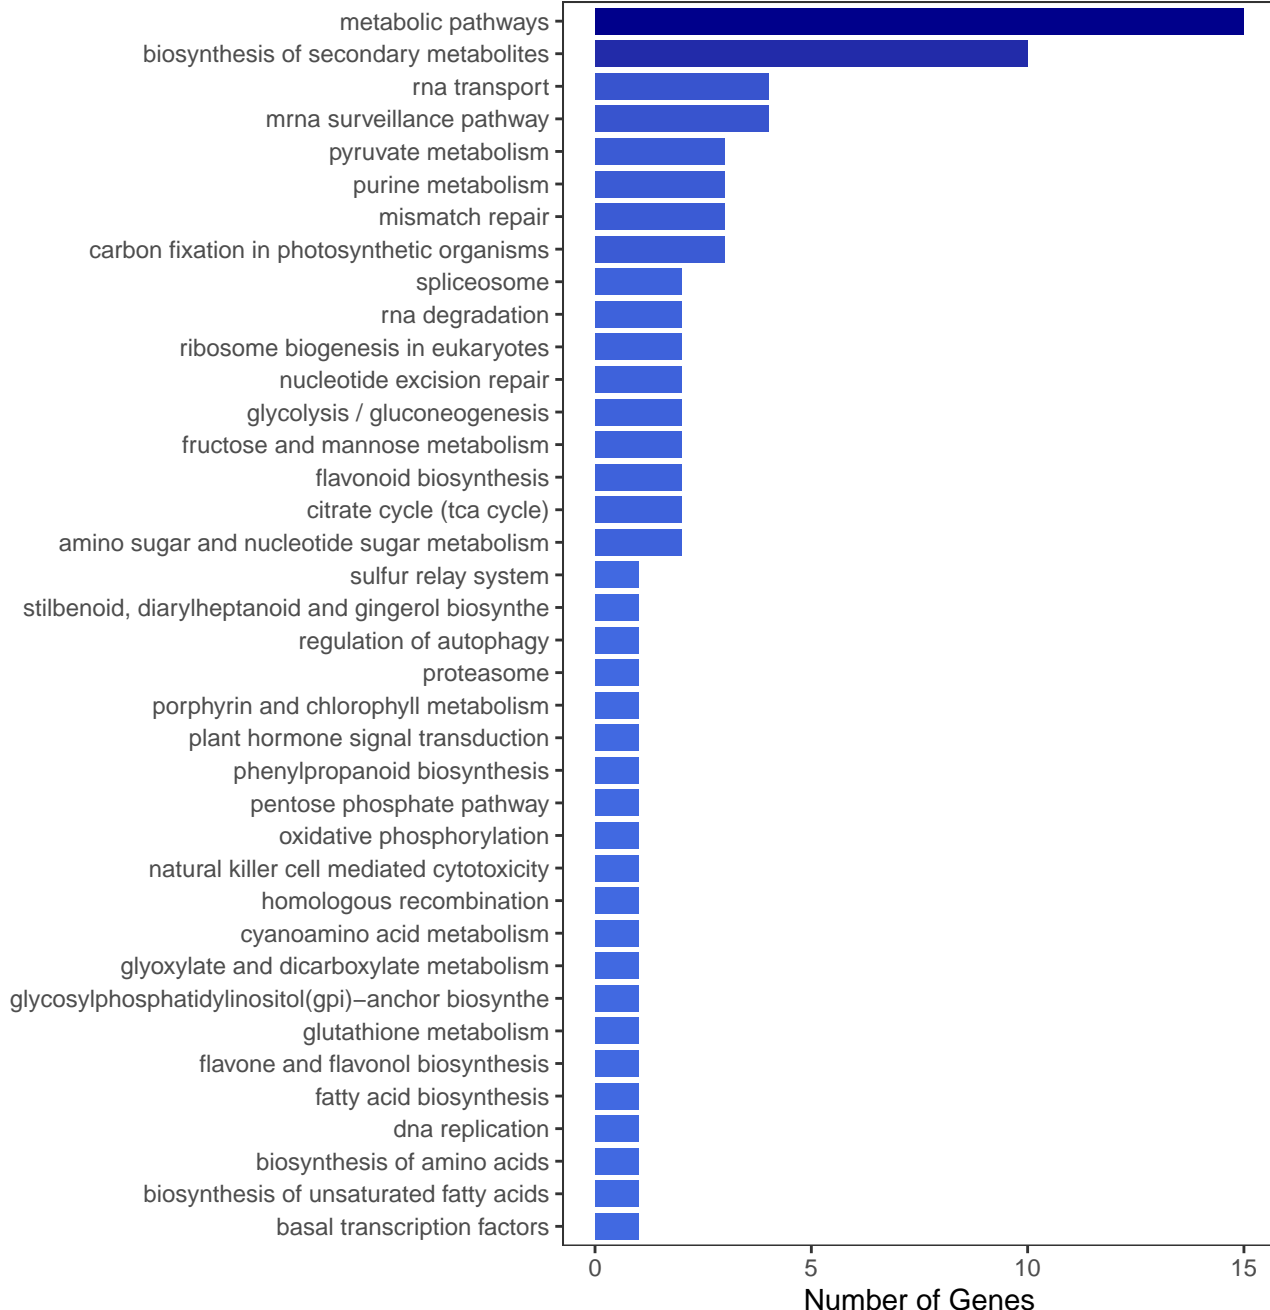

D

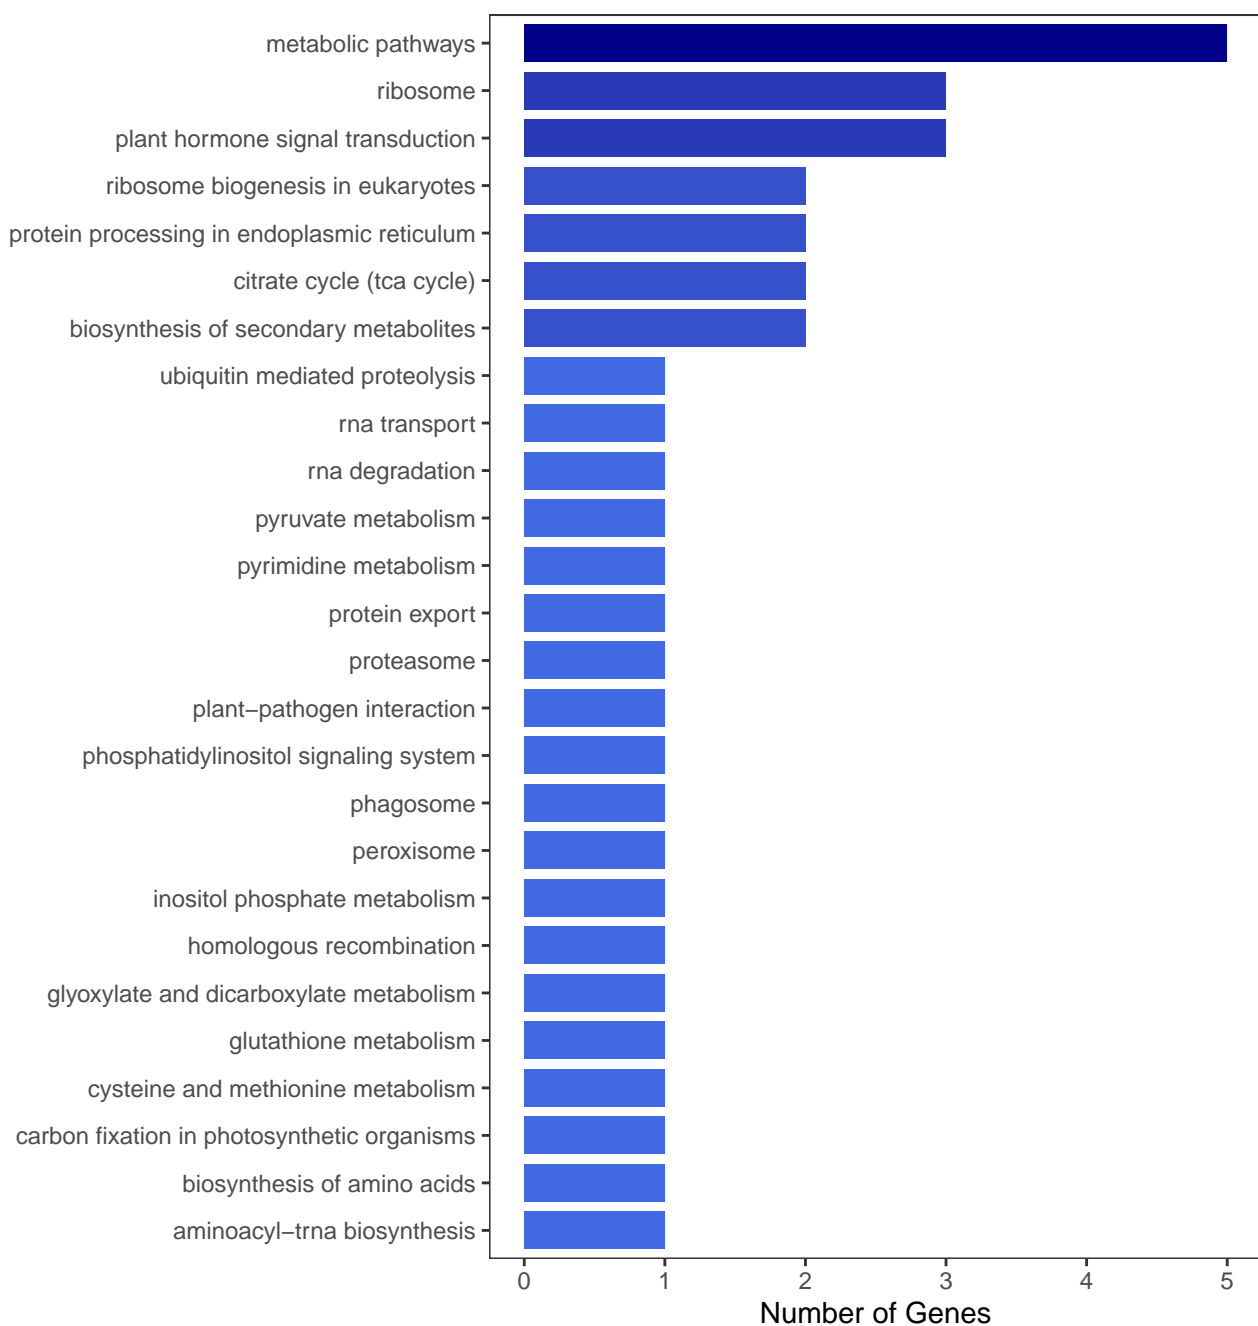

E

KEGG

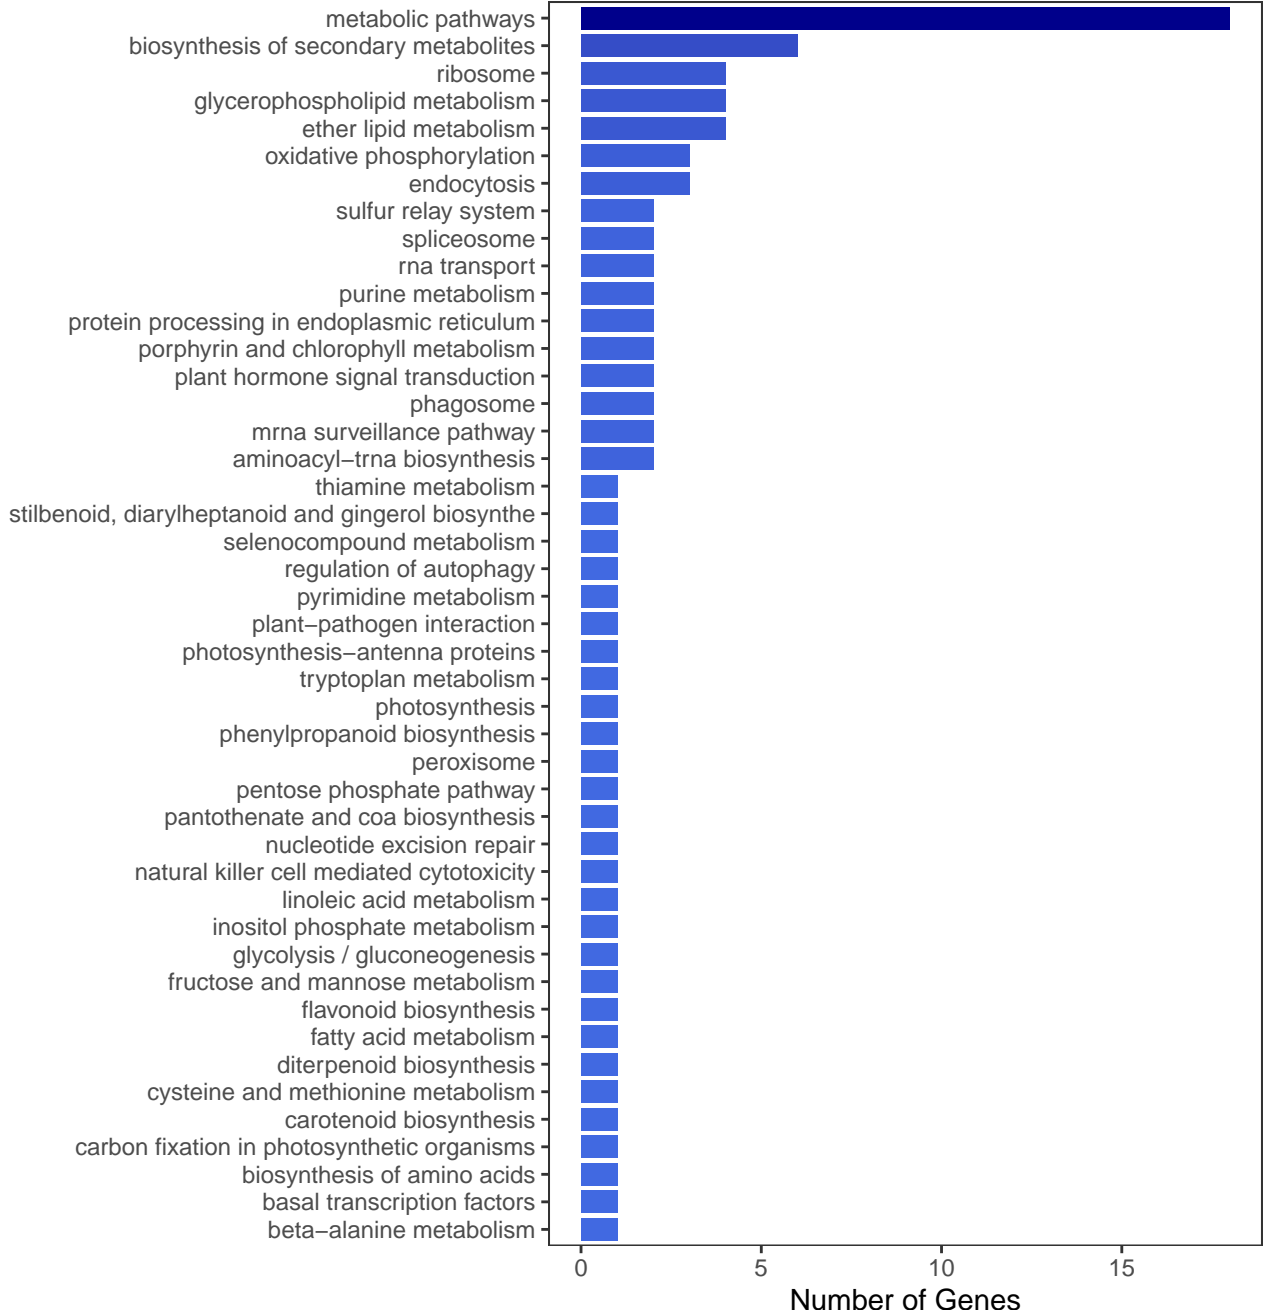

Supplementary Figure 6

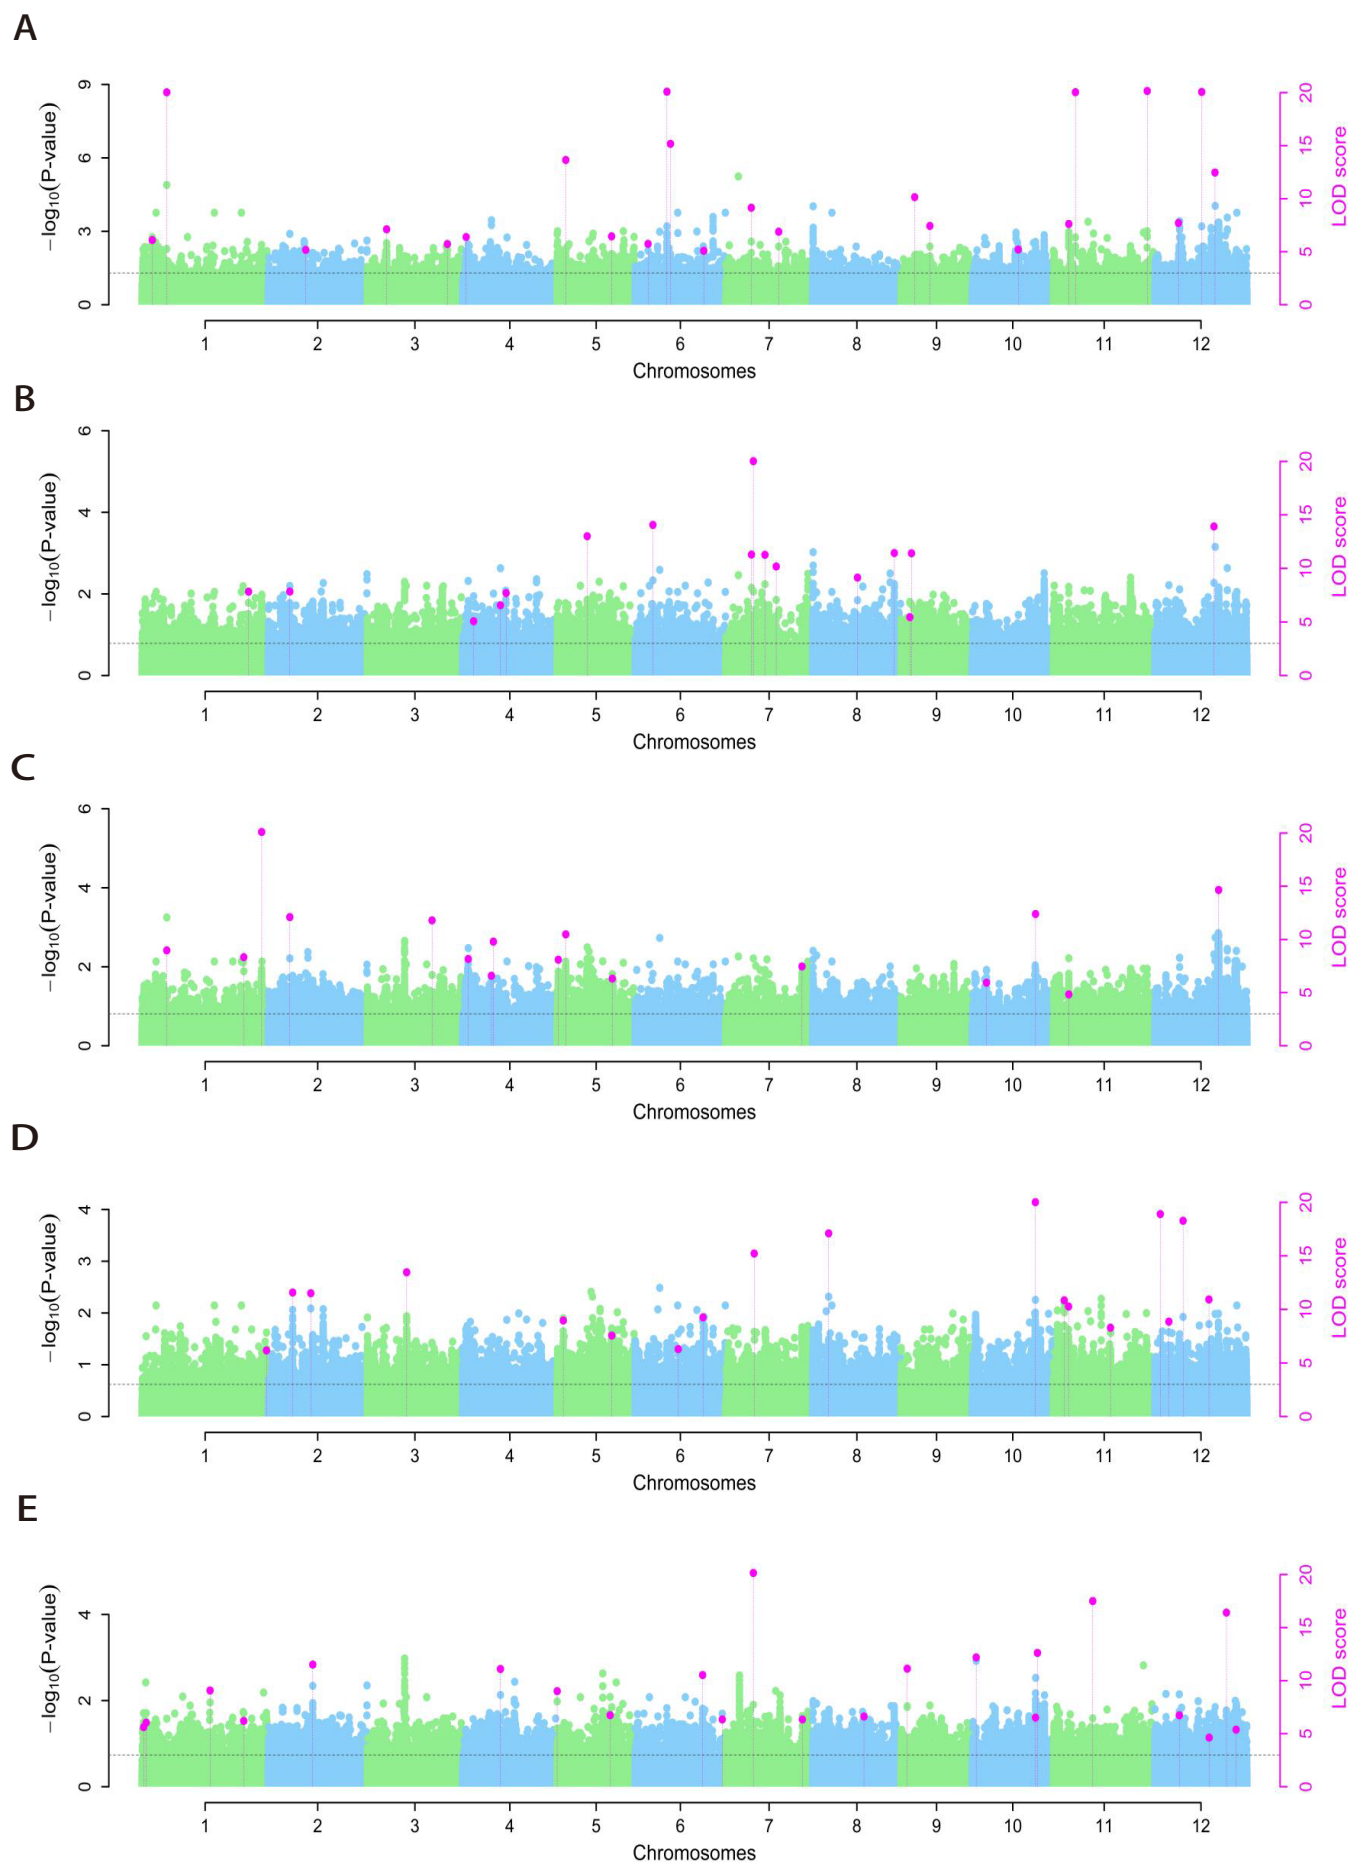

A Supplementary Figure 7

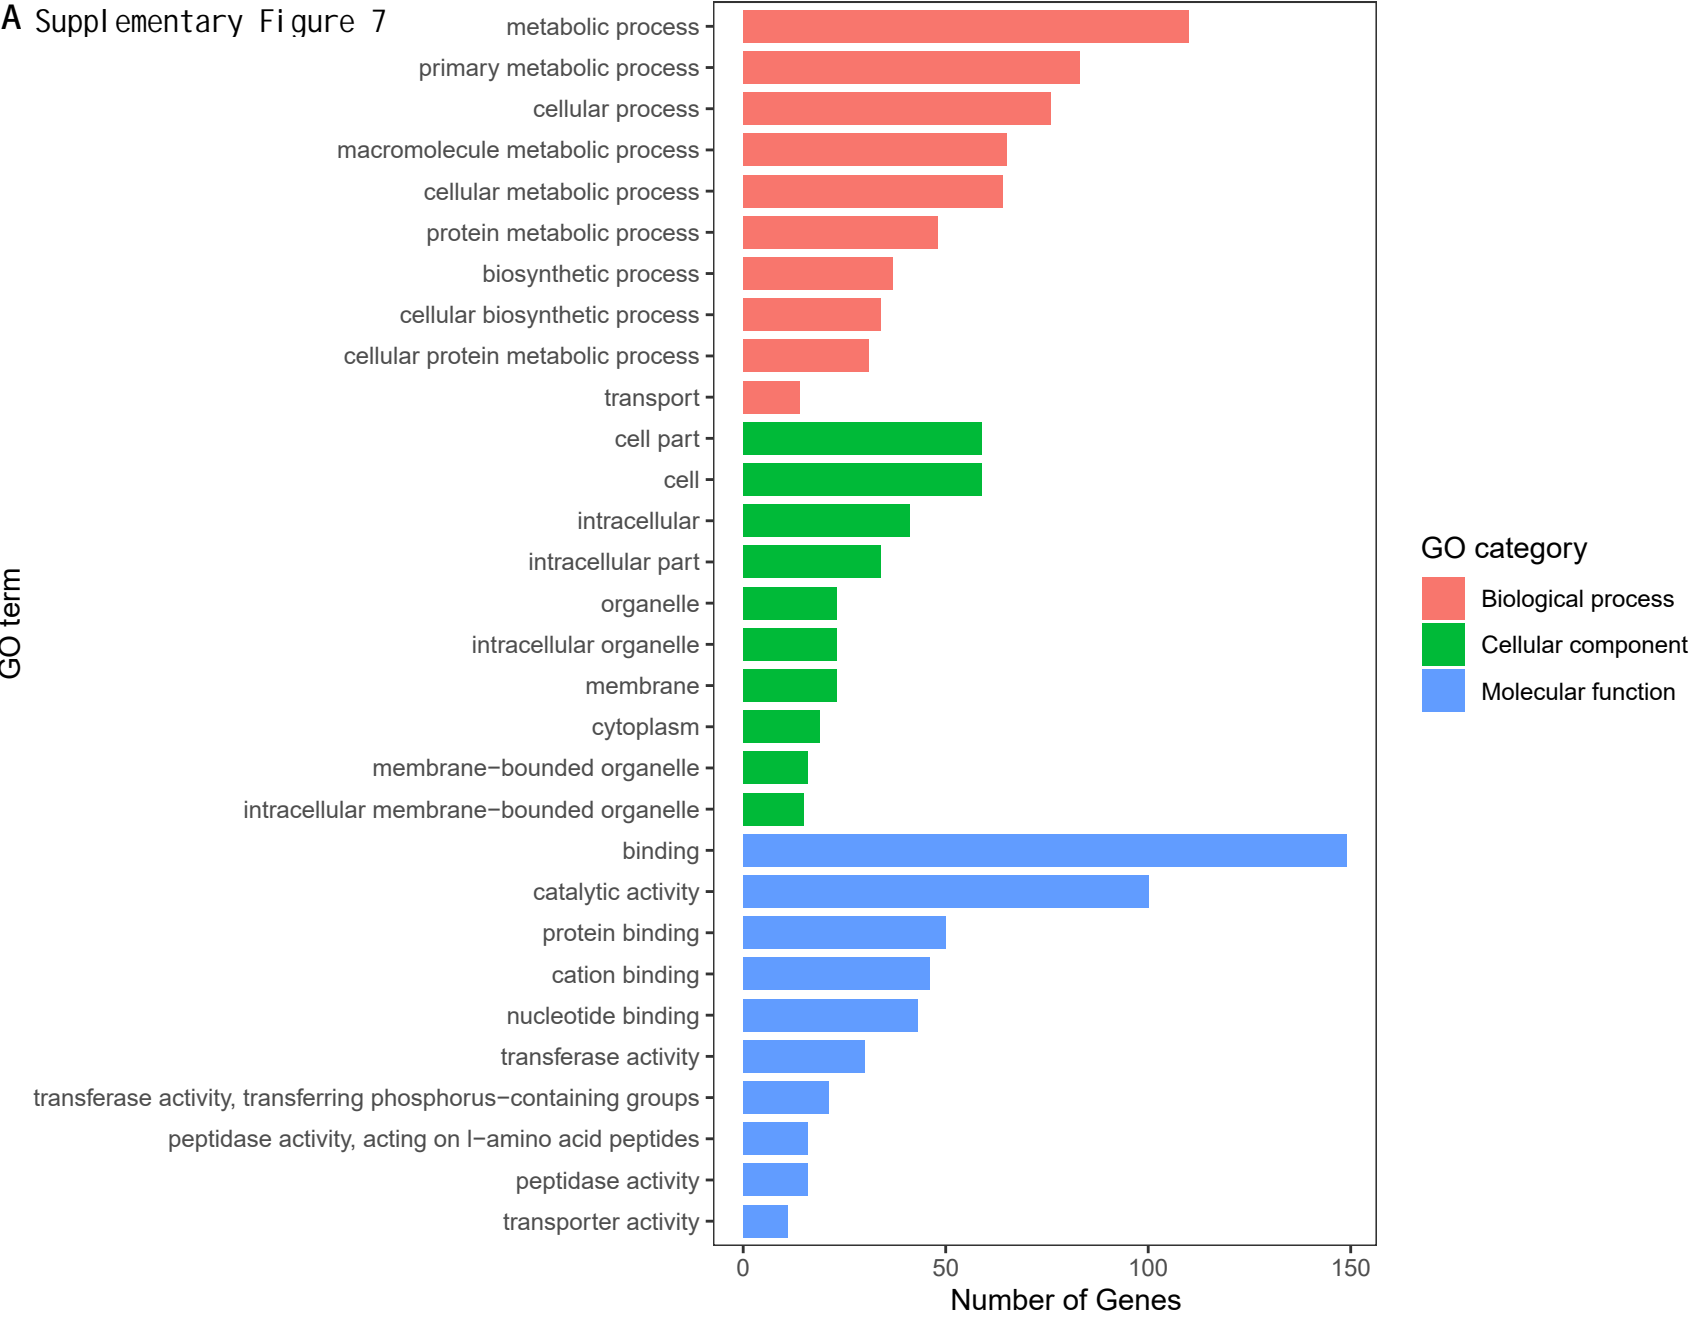

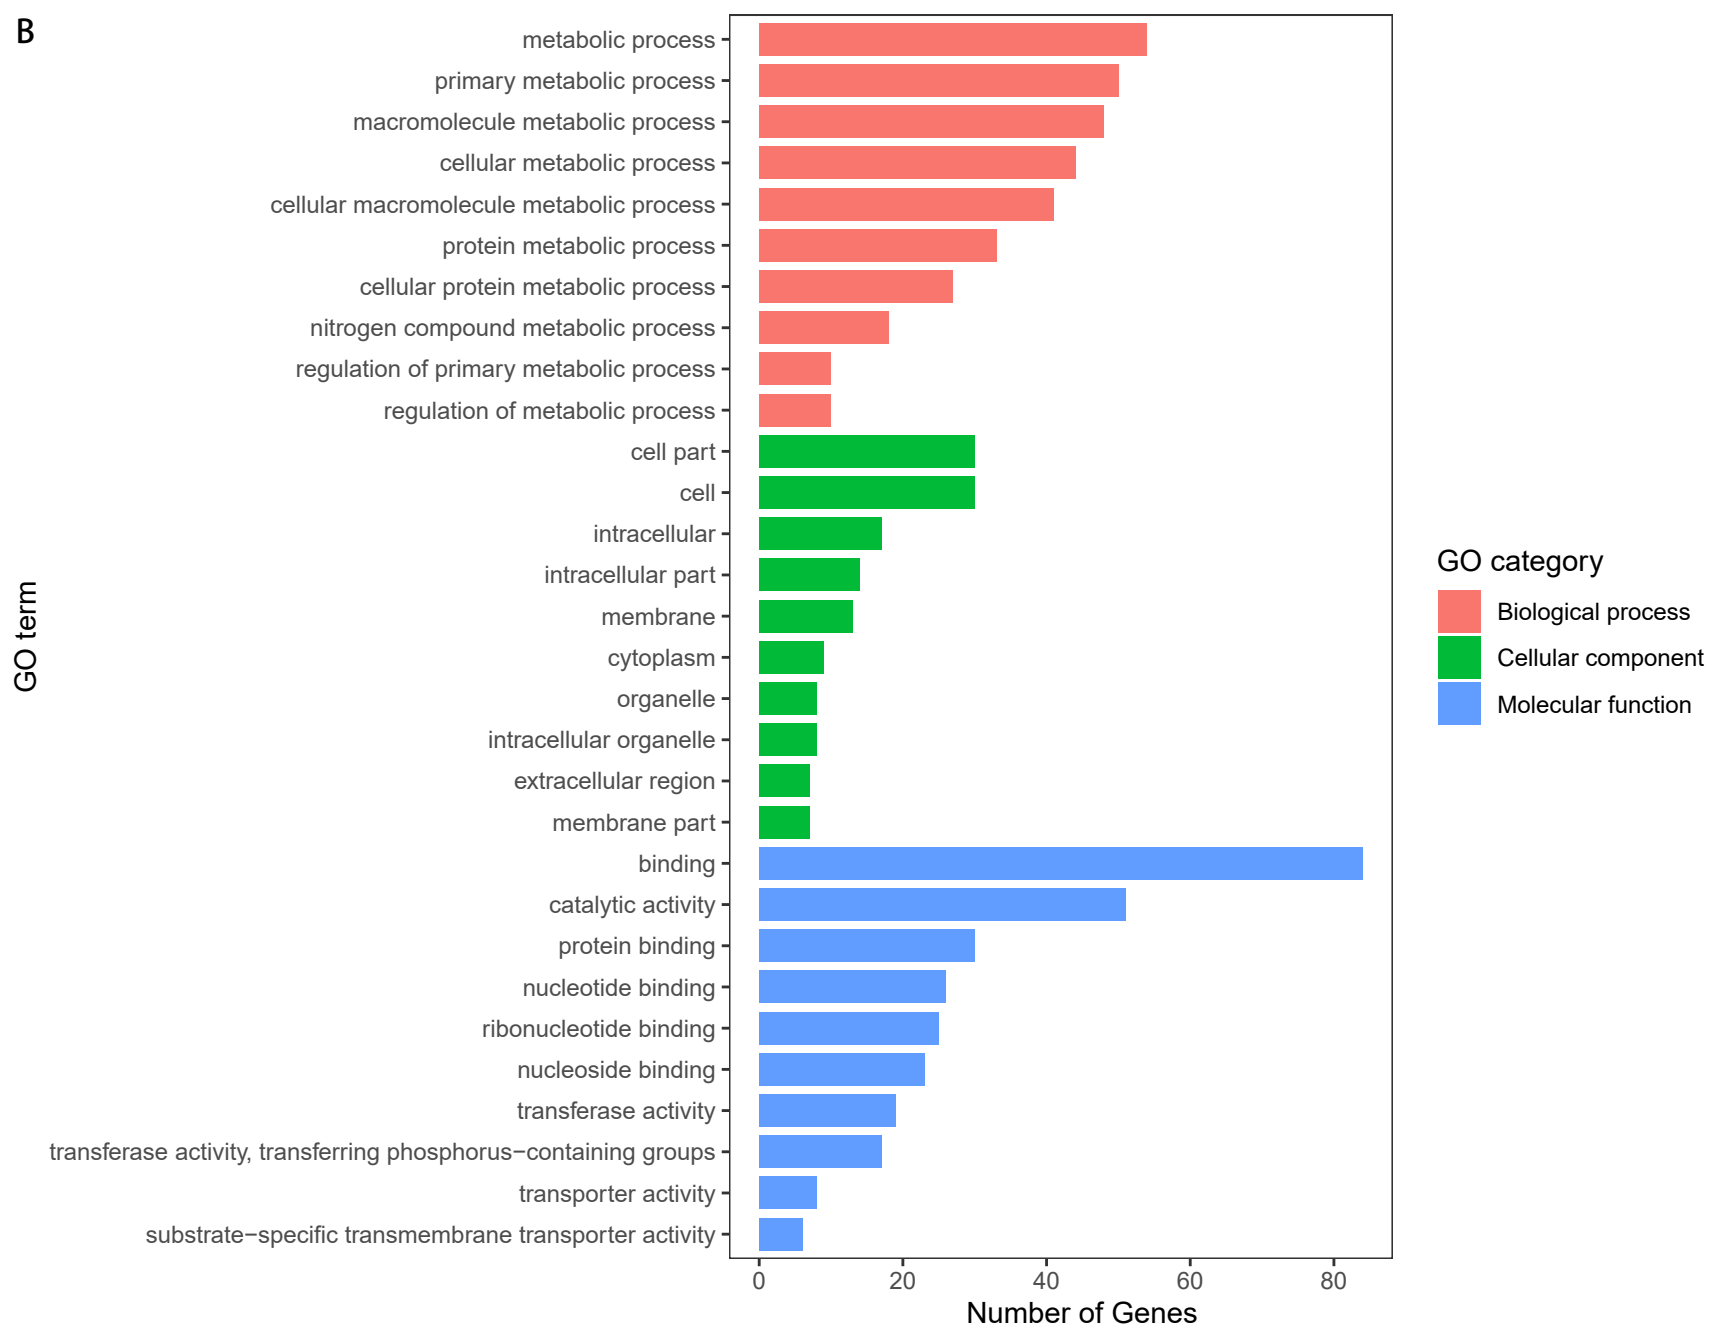



C

GO term

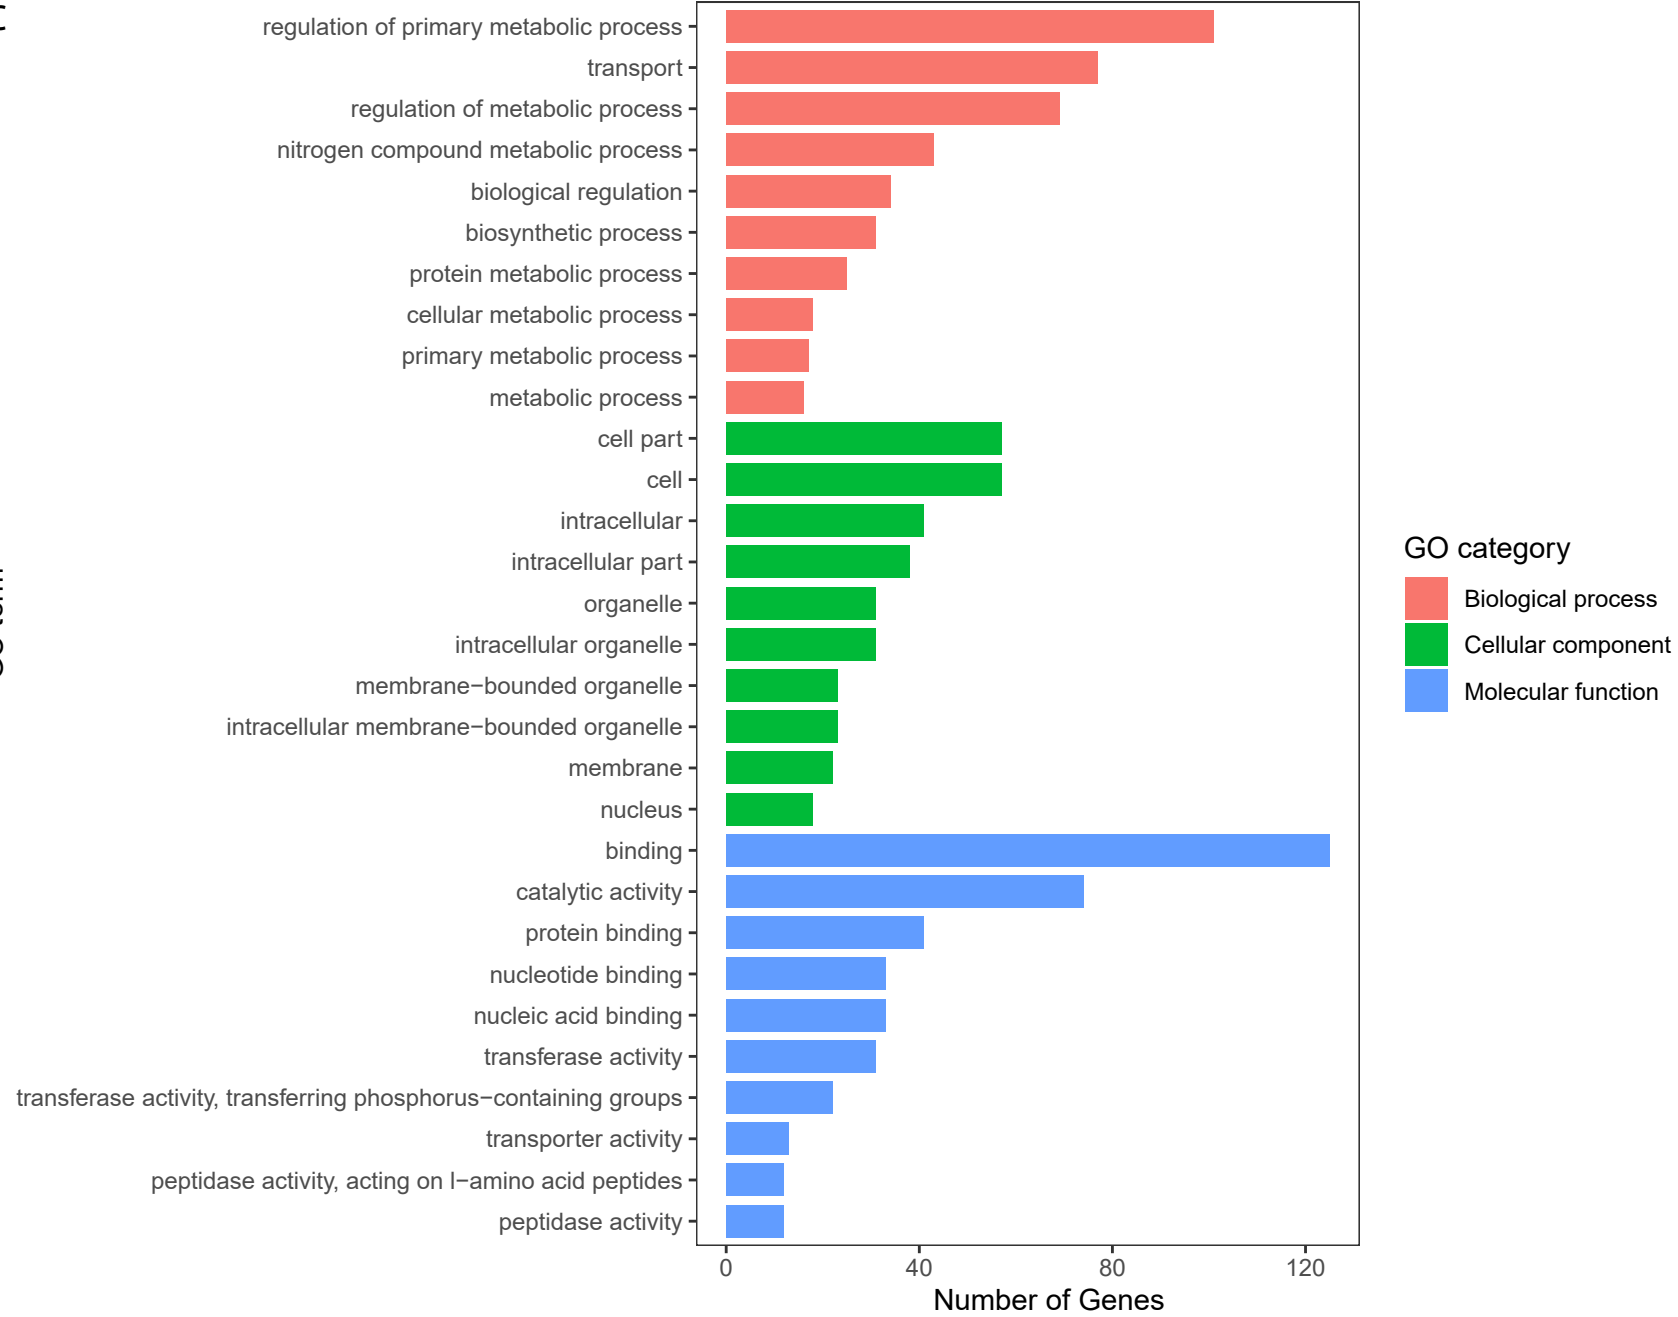

D

GO term

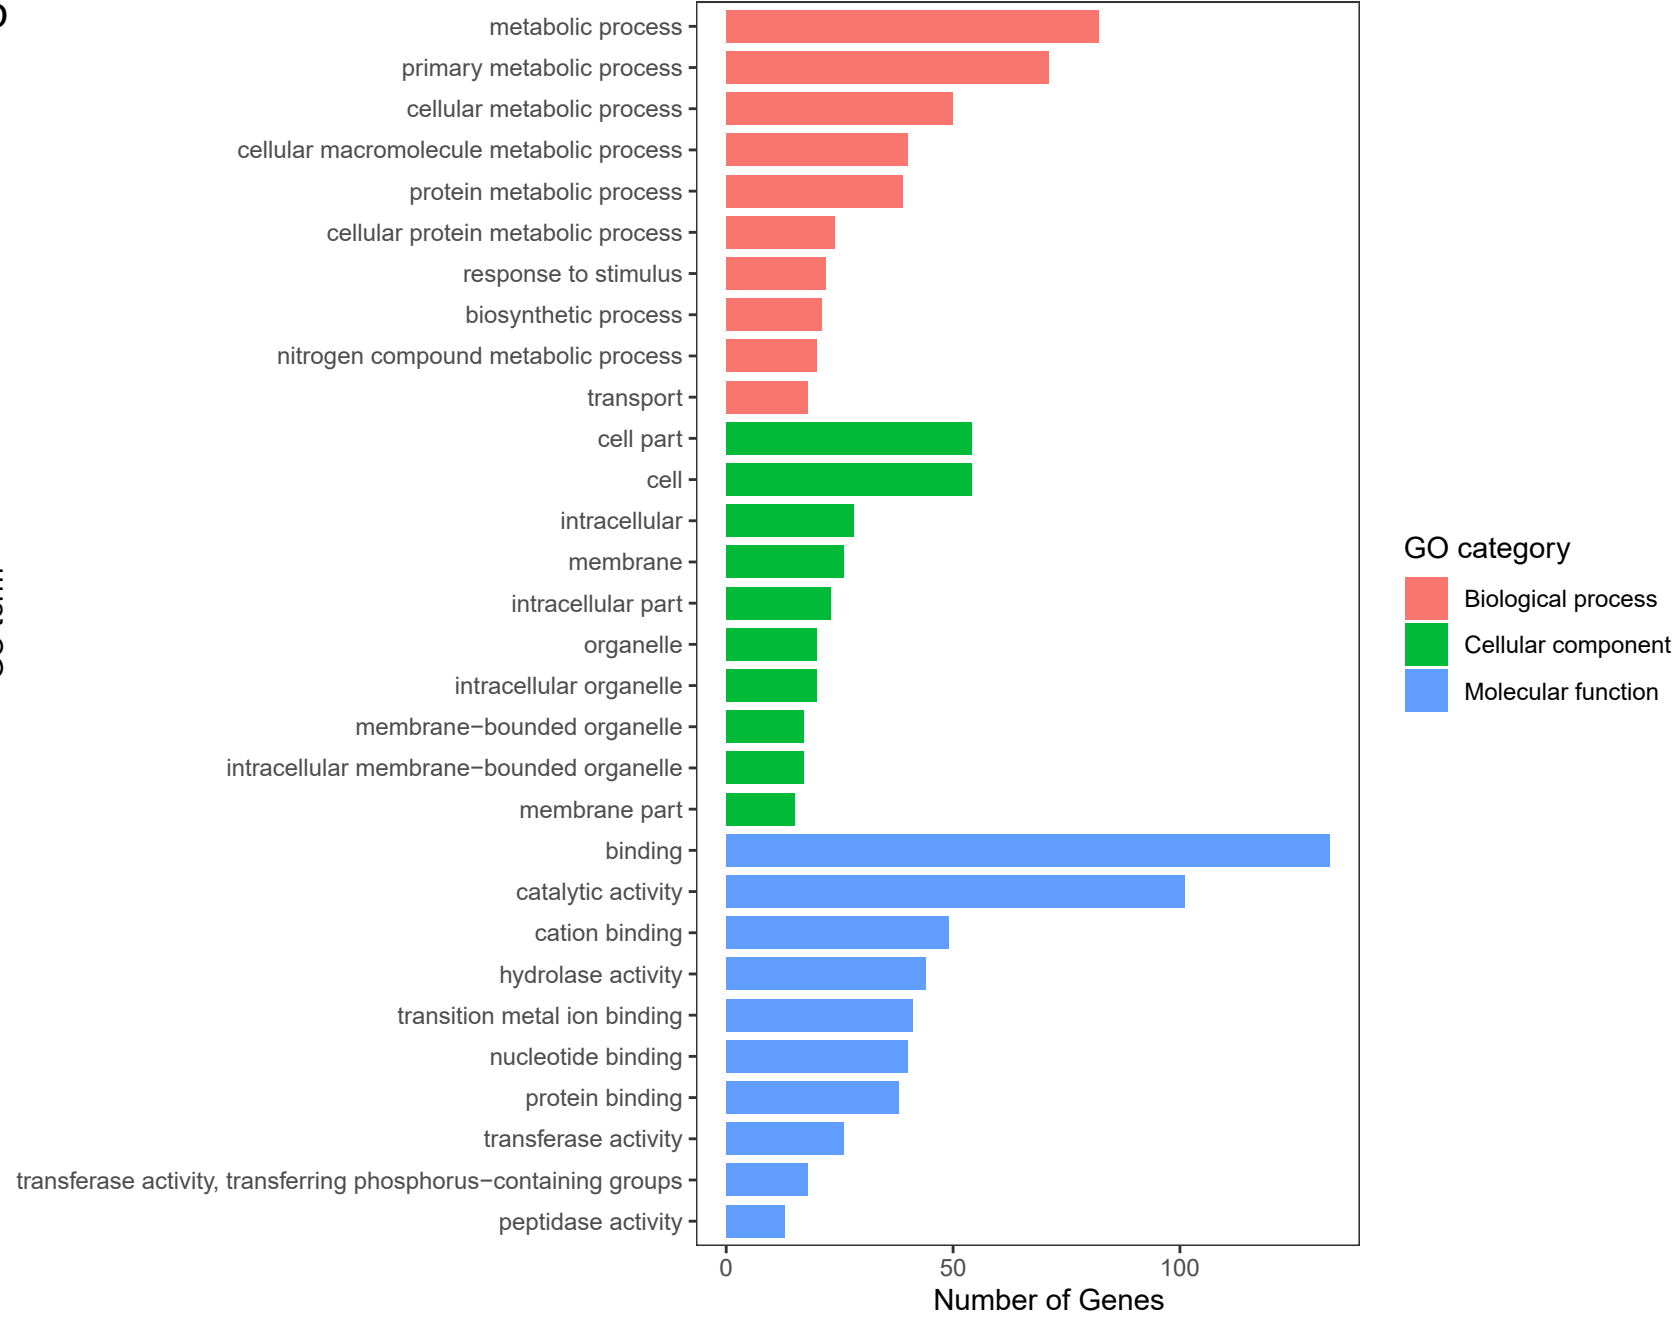

E

GO term

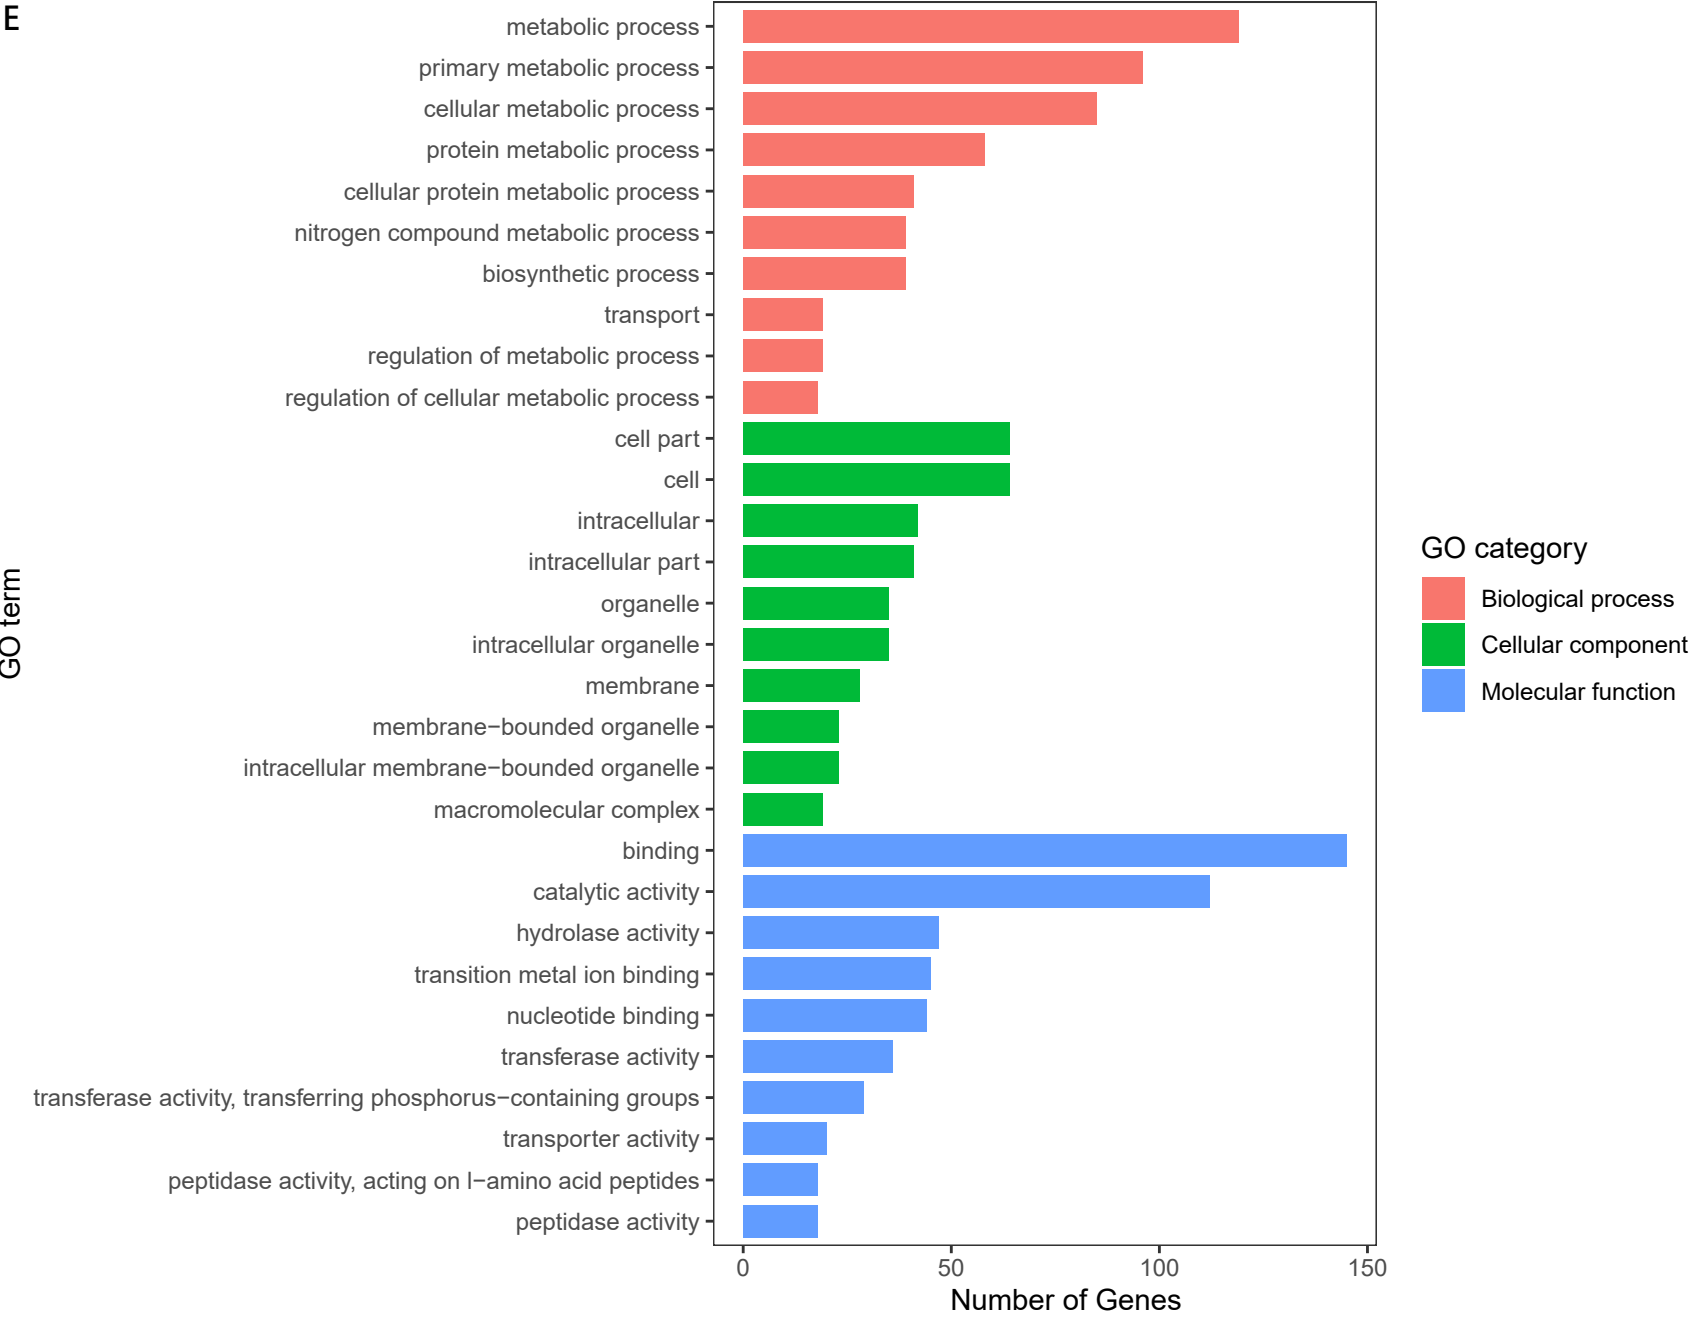

**A** Supplementary Figure 8

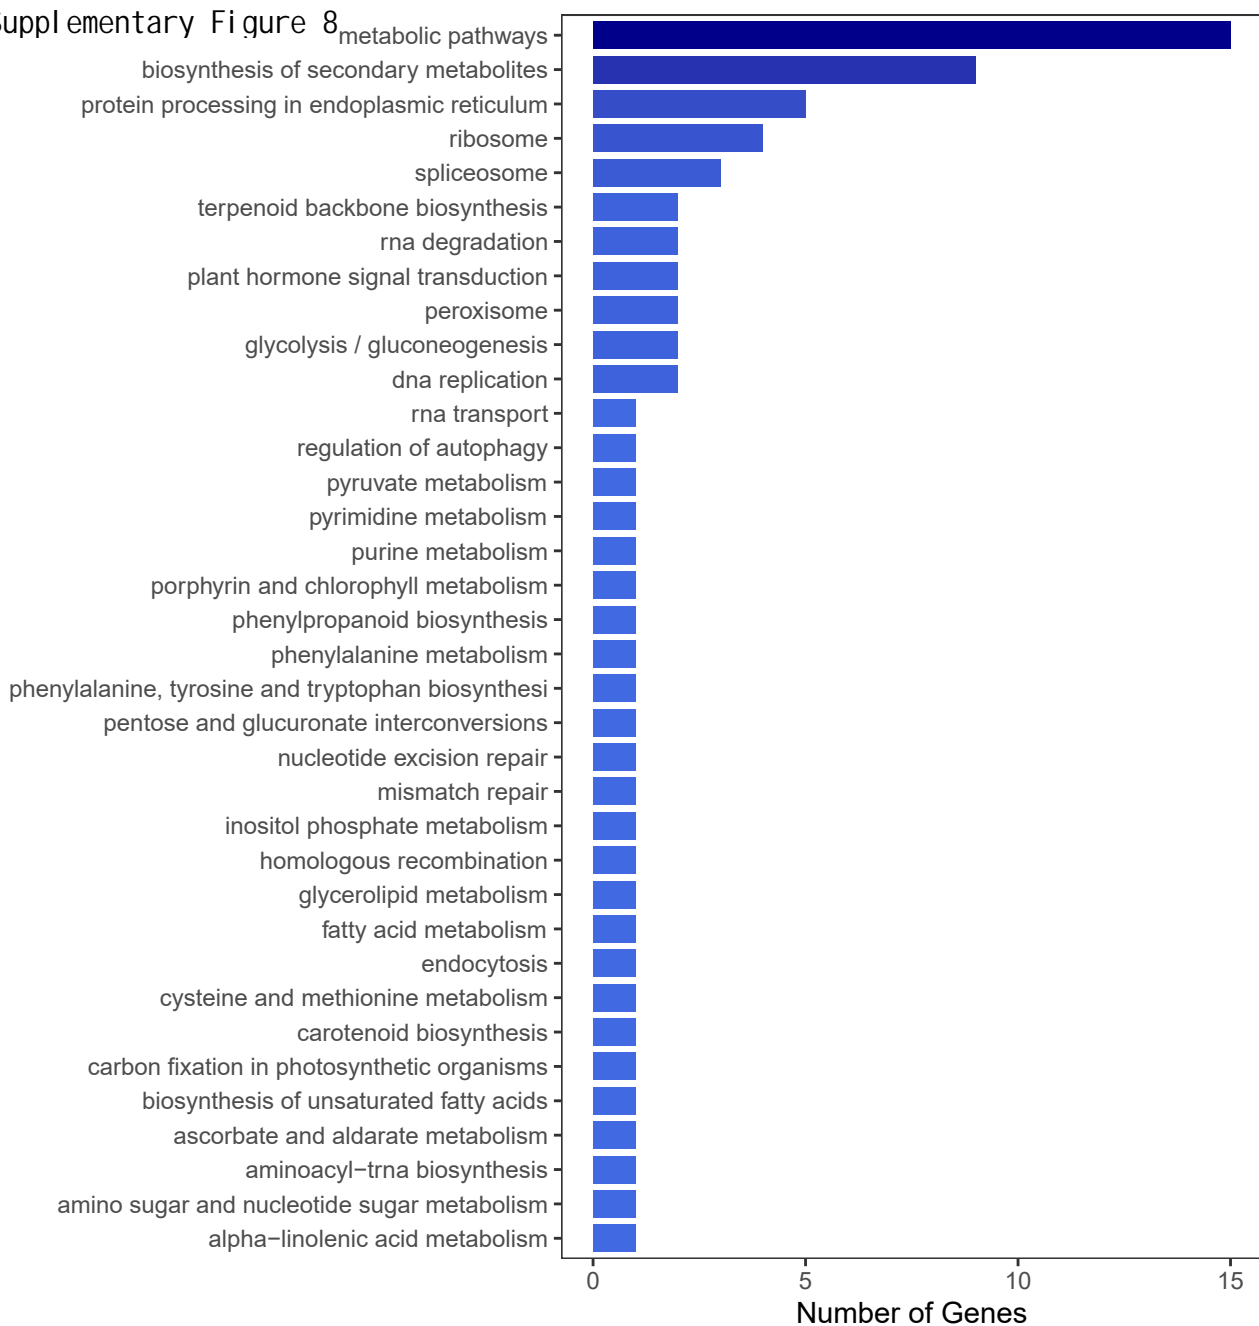

B

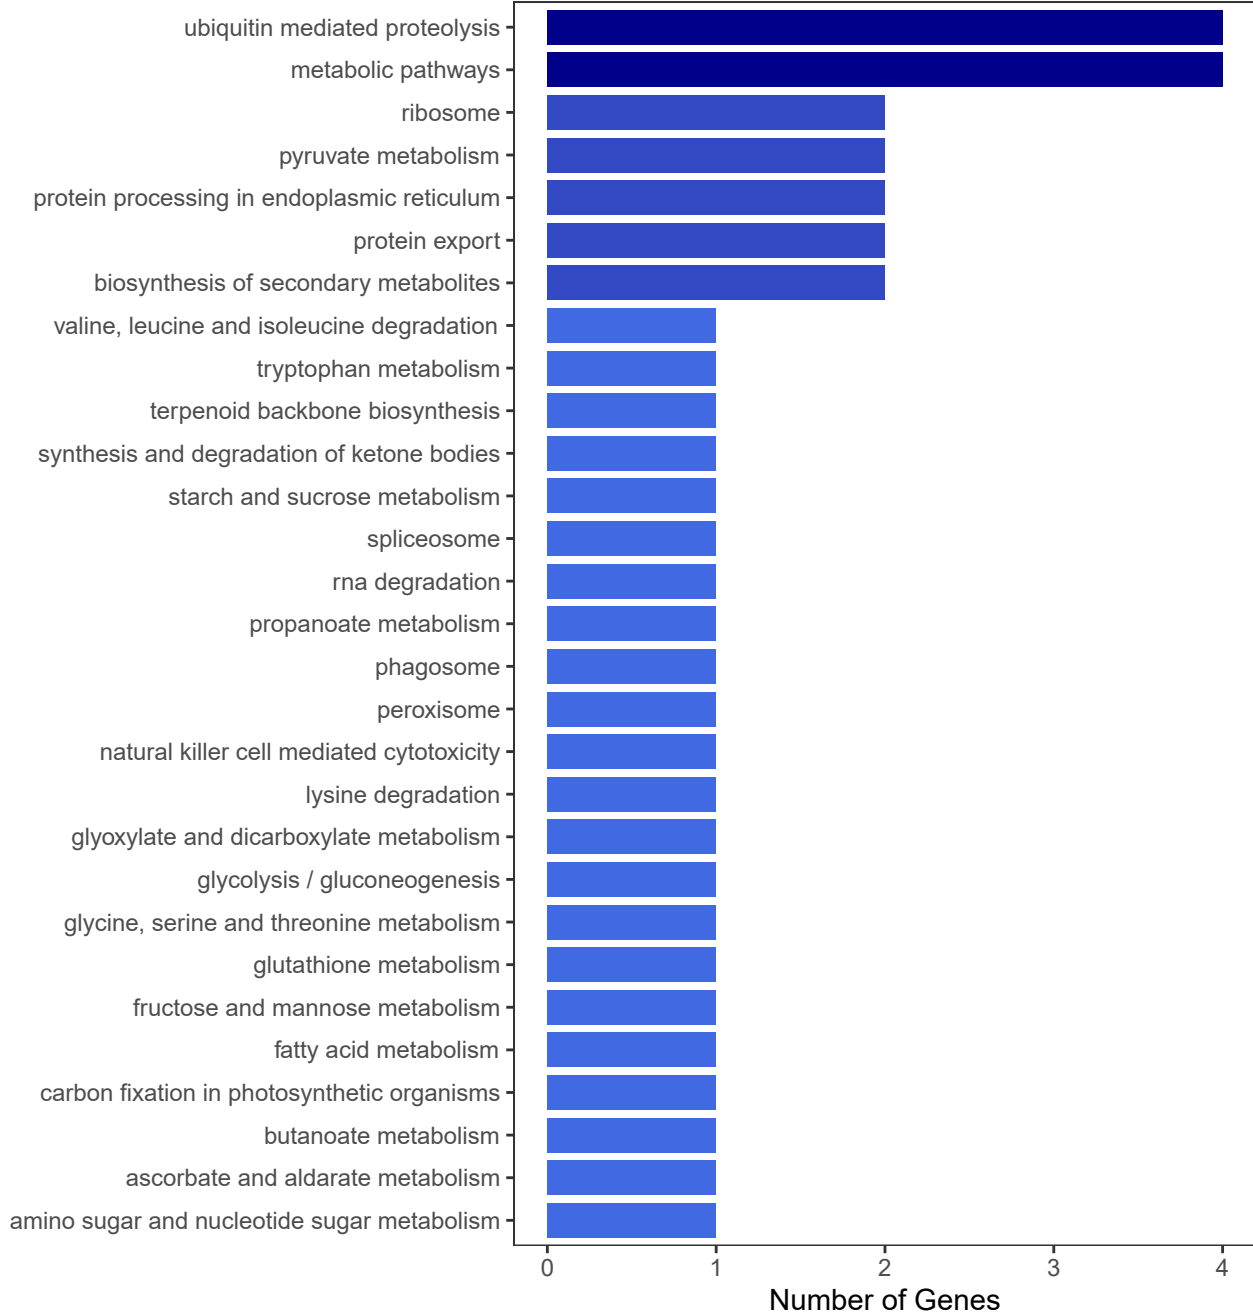

C

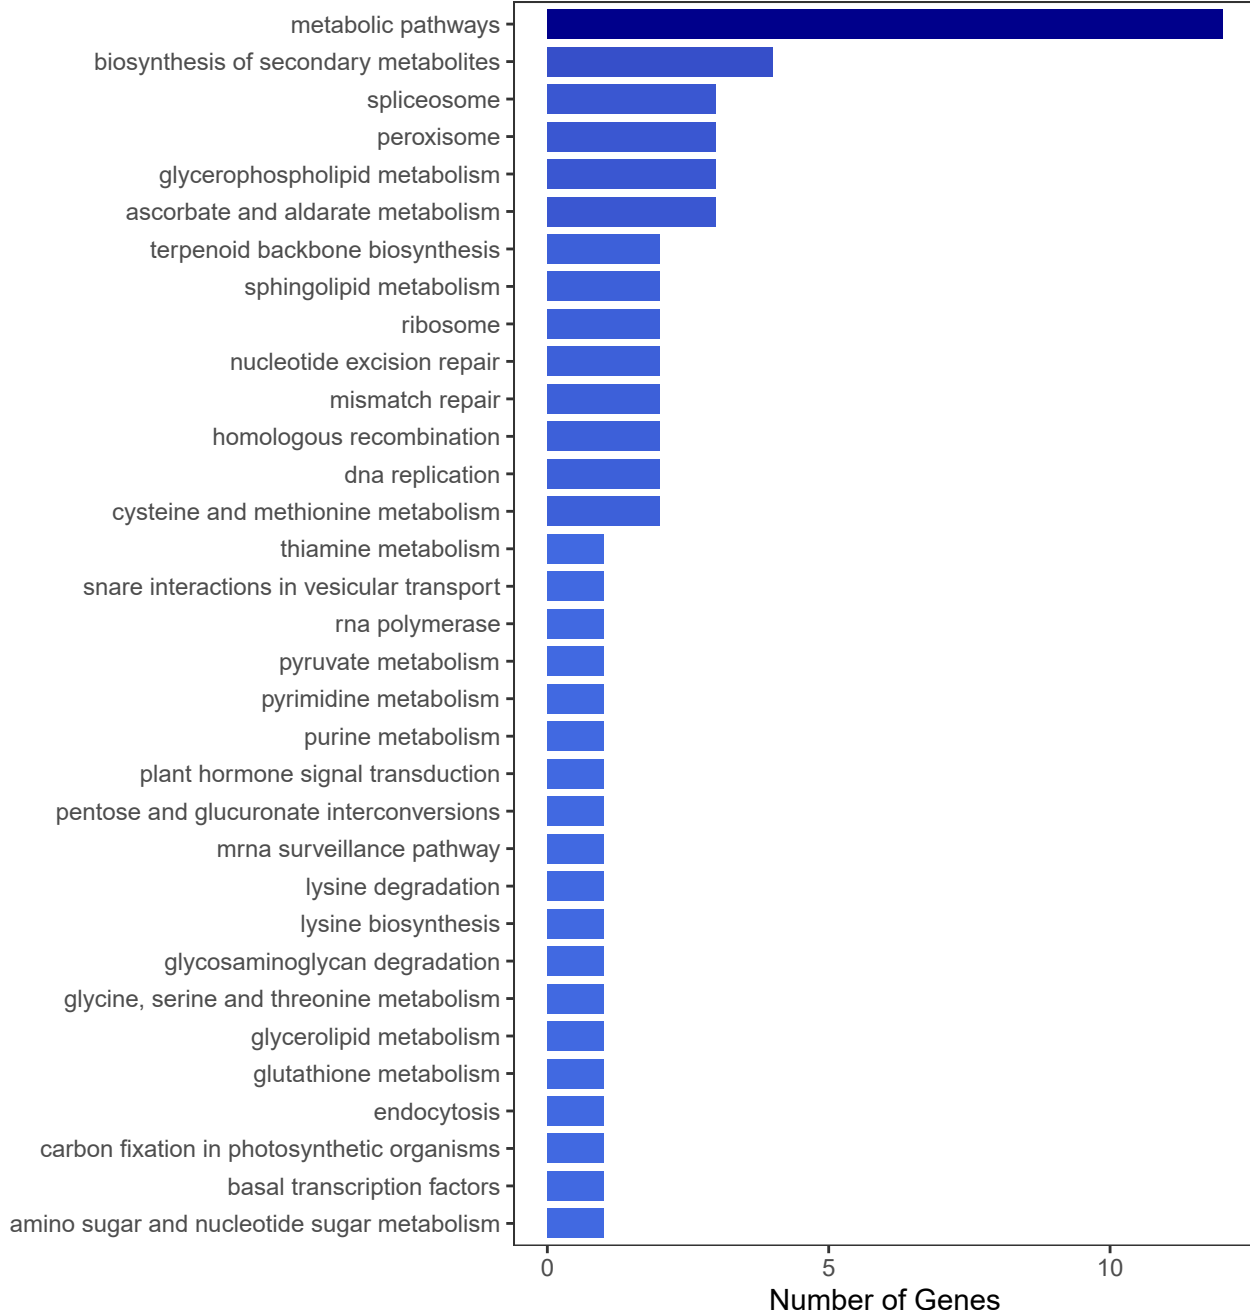

D

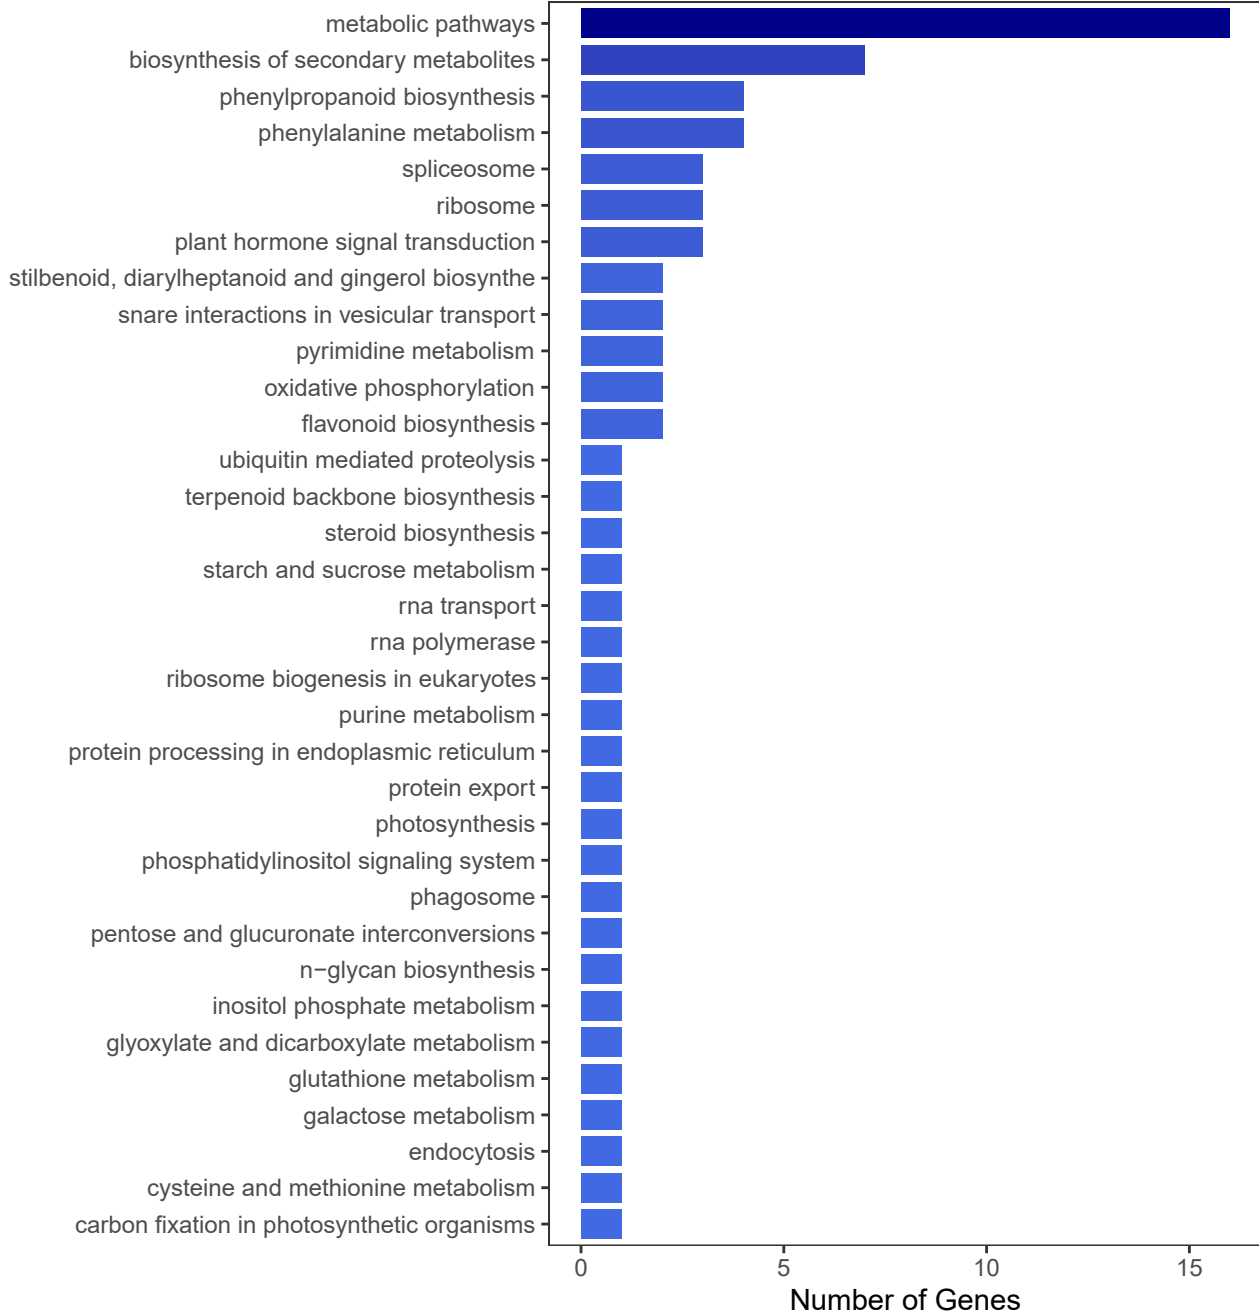

E

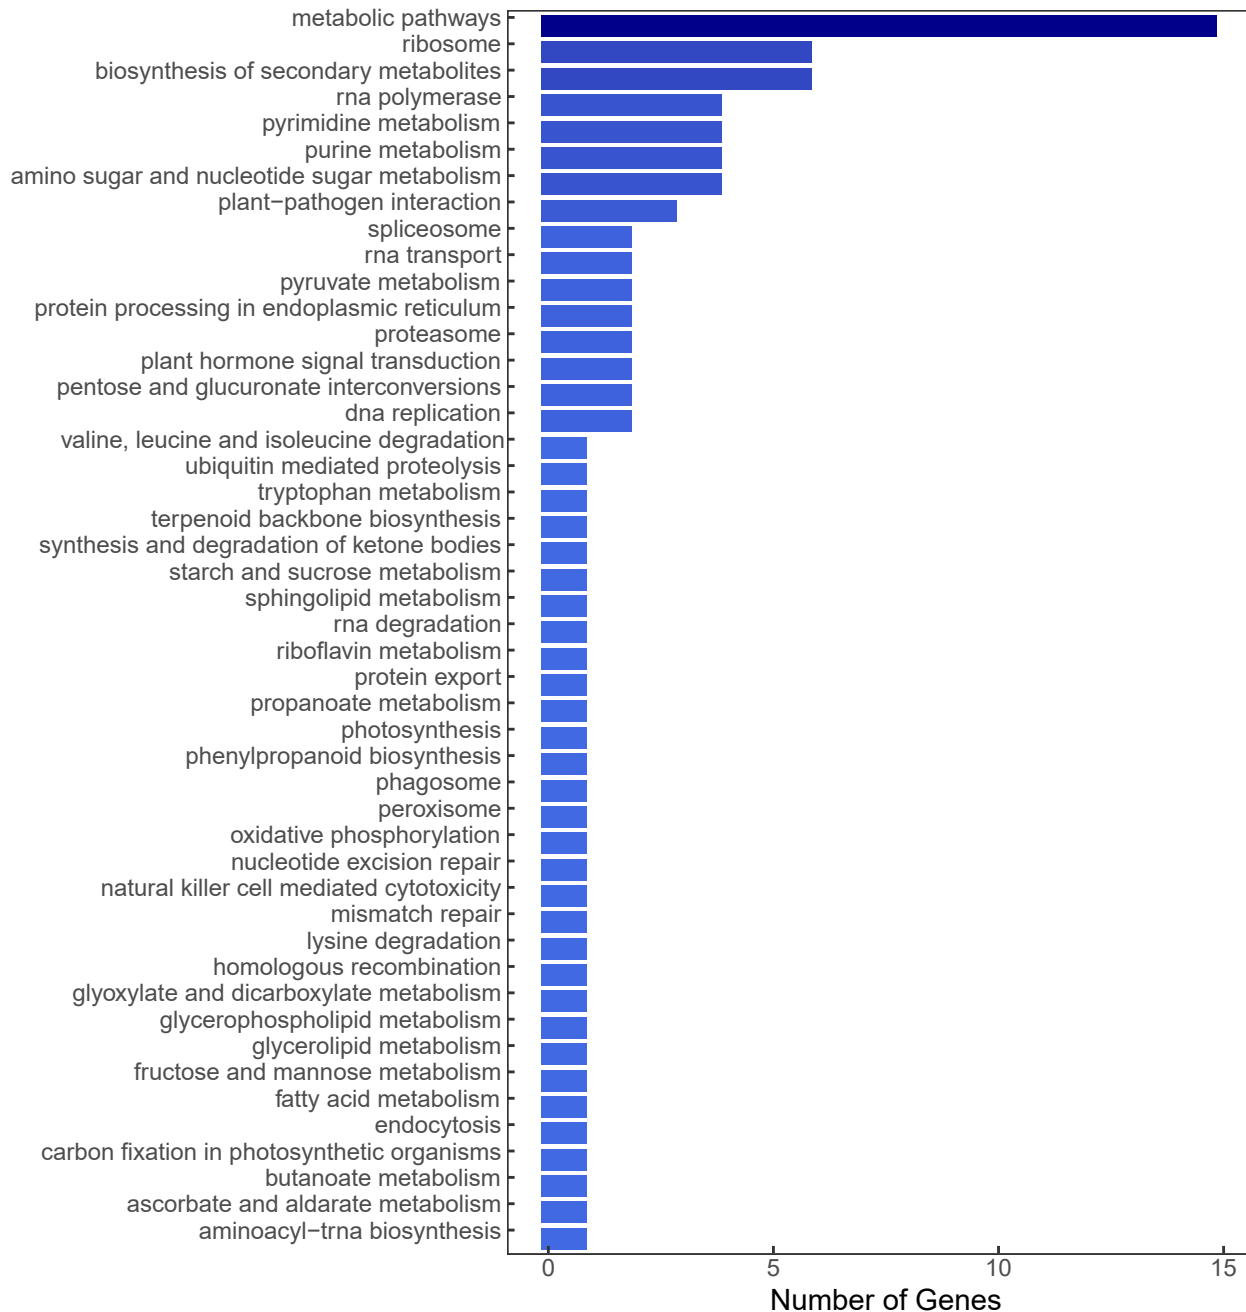

Supplement: Image_1.PDF [file Image_1.PDF]
