# Supplementary material for: Genome-wide association studies of five free amino acid levels in rice
Source: Front Plant Sci. 2022 Nov 7;13:1048860. doi: 10.3389/fpls.2022.1048860 (PMC9676653; doi:10.3389/fpls.2022.1048860)
Supplement: Supplementary file 2 [file Table_1.xlsx]

## Sheet: Supplementary Table 1
Supplementary Table 1 | Summary of QTNs detected from five FAA datasets by different methods.
Trait	QTN/SNP	SNP	Method	LOD	R2 (%)	P value
Val	408139047	C/T	3VmrMLM	11.9688	0.842	1.13592e-13
Val	1004234934	C/T	3VmrMLM	13.8497	0.904	1.39267e-15
Val	123419417	C/T	3VmrMLM	16.7853	1.2085	1.47155e-18
Val	1107104392	T/C	3VmrMLM	17.8148	1.2421	1.3355e-19
Val	224287444	A/C	3VmrMLM	6.9823	1.2995	1.42448e-08
Val	216376081	A/T	3VmrMLM	5.1153	1.3136	1.21346e-06
Val	1100696362	C/T	3VmrMLM	19.5081	1.3515	2.5892e-21
Val	1107370581	A/G	3VmrMLM	17.98	1.499	9.08888e-20
Val	914864565	G/C	3VmrMLM	23.4247	1.5754	2.86918e-25
Val	403651481	T/G	3VmrMLM	8.8679	1.8433	1.65487e-10
Val	900526550	T/C	3VmrMLM	7.7049	1.8931	2.57515e-09
Val	1116029050	T/C	3VmrMLM	10.2868	1.9398	5.8751e-12
Val	909185340	A/G	3VmrMLM	8.8555	1.9488	1.70401e-10
Val	1125117388	A/G	3VmrMLM	14.7027	2.0129	1.89782e-16
Val	721820766	G/A	3VmrMLM	24.2302	2.025	4.41569e-26
Val	618538935	T/C	3VmrMLM	9.014	2.1325	1.1729e-10
Val	711043834	A/G	3VmrMLM	28.1363	2.1669	5.09448e-30
Val	1017905052	C/T	3VmrMLM	11.7717	2.211	1.80272e-13
Val	918724630	C/T	3VmrMLM	31.8419	2.2779	9.44384e-34
Val	1211697158	G/A	3VmrMLM	11.3206	2.2792	5.19079e-13
Val	519754561	C/A	3VmrMLM	10.2328	2.368	6.67049e-12
Val	1123361007	T/G	3VmrMLM	14.3126	2.4423	4.72088e-16
Val	1115068475	G/A	3VmrMLM	23.8051	2.7686	1.18545e-25
Val	1005483742	T/G	3VmrMLM	26.8637	3.0488	9.76329e-29
Val	1117180756	A/G	3VmrMLM	13.4151	3.1644	3.84776e-15
Val	400762059	G/T	3VmrMLM	15.0147	3.3487	9.15993e-17
Val	628704573	C/T	3VmrMLM	15.1474	3.3552	6.71855e-17
Val	223416703	G/A	3VmrMLM	15.3706	3.5789	3.9905e-17
Val	1009752934	A/T	3VmrMLM	23.2066	3.5845	4.76184e-25
Val	110944343	A/G	3VmrMLM	19.2498	3.8209	4.72299e-21
Val	315484798	C/T	3VmrMLM	14.4796	3.9038	3.19611e-16
Val	142385079	G/A	3VmrMLM	25.1513	4.331	5.19968e-27
Val	107646091	C/A	FarmCPU		0.26947	4.79548e-14
Val	315524603	T/A	FarmCPU		0.157333	9.56377e-11
Val	500422472	A/G	FarmCPU		0.087601	6.00401e-09
Val	628647303	A/G	FarmCPU		0.124704	4.04509e-09
Val	1021875430	G/A	FarmCPU		0.193949	7.38648e-11
Val	614622108	C/A	mrMLM	3.0563	0.5155	0.000175752
Val	914864565	G/C	mrMLM	4.0236	1.1129	1.67379e-05
Val	1112479618	G/A	mrMLM	3.2895	1.3673	9.94031e-05
Val	1007930450	T/C	mrMLM	3.1714	1.3699	0.000132617
Val	1004962980	T/C	mrMLM	5.2274	1.4889	9.27897e-07
Val	110944343	A/G	mrMLM	4.6898	1.592	3.36434e-06
Val	1217868859	T/C	mrMLM	3.235	1.6119	0.000113527
Val	1118389021	T/C	mrMLM	5.4988	1.6257	4.85177e-07
Val	403651481	T/G	mrMLM	3.5134	1.6489	5.76235e-05
Val	804834681	A/G	mrMLM	5.6278	1.7772	3.56615e-07
Val	224287444	A/C	mrMLM	8.2002	2.1541	7.99282e-10
Val	309399206	G/A	mrMLM	4.6829	2.1779	3.42058e-06
Val	900526550	T/C	mrMLM	6.2843	2.2938	7.46793e-08
Val	604831398	C/A	mrMLM	4.7572	2.3486	2.8622e-06
Val	919842590	A/G	mrMLM	5.7037	2.6451	2.97577e-07
Val	228490809	T/C	mrMLM	3.3755	2.7165	8.05935e-05
Val	415382956	A/G	mrMLM	6.8997	2.8088	1.73261e-08
Val	401468888	G/C	mrMLM	8.9713	3.2439	1.29718e-10
Val	1217047868	A/C	mrMLM	3.4413	3.7662	6.86752e-05
Val	1123805741	G/C	mrMLM	7.6947	4.6444	2.63815e-09
Val	326835680	A/G	mrMLM	7.3878	4.6621	5.45255e-09
Val	715148749	T/C	mrMLM	5.9021	5.54	1.85439e-07
Val	223416703	G/A	mrMLM	9.0576	6.2731	1.05852e-10
Val	215377783	T/A	mrMLM	3.8026	14.6764	2.85627e-05
Val	224684584	A/G	FASTmrMLM	3.1022	0.0002	0.000157072
Val	401448842	C/T	FASTmrMLM	3.1427	0.7418	0.000142233
Val	1009752934	A/T	FASTmrMLM	3.143	0.5404	0.000142135
Val	909185340	A/G	FASTmrMLM	3.1647	1.2228	0.000134803
Val	826857655	A/C	FASTmrMLM	3.2241	0.7695	0.0001166
Val	1106020171	G/A	FASTmrMLM	3.4018	0.5096	7.55962e-05
Val	1100696362	C/T	FASTmrMLM	3.4231	0.2988	7.17794e-05
Val	1221580398	T/G	FASTmrMLM	3.5107	1.6811	5.79963e-05
Val	900526550	T/C	FASTmrMLM	3.7519	1.523	3.22998e-05
Val	1217047868	A/C	FASTmrMLM	3.7555	1.6547	3.20184e-05
Val	1214758652	A/G	FASTmrMLM	3.7693	0.506	3.09671e-05
Val	1116029050	T/C	FASTmrMLM	3.7751	0.4536	3.05351e-05
Val	1121411812	T/C	FASTmrMLM	3.9871	0.928	1.8281e-05
Val	400763597	A/G	FASTmrMLM	4.0507	1.1698	1.56747e-05
Val	817502749	T/G	FASTmrMLM	4.0675	0.9854	1.50522e-05
Val	507356184	G/A	FASTmrMLM	4.3553	0.6802	7.51969e-06
Val	400762059	G/T	FASTmrMLM	4.4796	0.8506	5.57571e-06
Val	717627459	A/G	FASTmrMLM	4.6158	1.1888	4.01883e-06
Val	519135770	A/G	FASTmrMLM	4.8787	1.9722	2.13845e-06
Val	918724630	C/T	FASTmrMLM	4.8824	1.0809	2.11982e-06
Val	216346195	A/G	FASTmrMLM	5.1438	1.1424	1.13344e-06
Val	402162015	G/A	FASTmrMLM	6.068	1.5869	1.2494e-07
Val	907438341	A/G	FASTmrMLM	6.267	2.4531	7.78216e-08
Val	311706589	T/C	FASTmrMLM	6.6625	2.7138	3.04159e-08
Val	401468888	G/C	FASTmrMLM	6.9297	3.2015	1.61362e-08
Val	914864565	G/C	FASTmrMLM	7.4047	1.276	5.23842e-09
Val	110944343	A/G	FASTmrMLM	9.4596	5.2191	4.10866e-11
Val	1208546897	T/C	FASTmrEMMA	3.2272	3.8441e-09	0.000115718
Val	519668260	A/G	FASTmrEMMA	6.1869	4.4367e-07	9.41456e-08
Val	401466361	A/G	FASTmrEMMA	7.1076	6.2633e-07	1.05877e-08
Val	1010990319	G/A	FASTmrEMMA	3.3034	2.5127e-06	9.60727e-05
Val	1217730447	G/C	FASTmrEMMA	3.268	3.958e-05	0.000104737
Val	908735501	T/C	FASTmrEMMA	3.116	7.4784e-05	0.00015188
Val	401766704	C/T	FASTmrEMMA	3.0852	0.0007	0.000163719
Val	219818846	A/C	FASTmrEMMA	3.8983	0.0089	2.26621e-05
Val	827240078	C/G	FASTmrEMMA	4.5477	0.0215	4.73369e-06
Val	907407814	T/C	FASTmrEMMA	3.689	0.0249	3.76184e-05
Val	418645995	G/A	FASTmrEMMA	3.9545	0.0419	1.97788e-05
Val	224189963	C/T	FASTmrEMMA	8.8326	0.1342	1.79846e-10
Val	1019868333	C/T	FASTmrEMMA	4.9706	0.161	1.71593e-06
Val	403199659	A/G	FASTmrEMMA	5.9446	0.1702	1.67571e-07
Val	319067962	A/G	FASTmrEMMA	5.1085	0.2016	1.2331e-06
Val	1106019970	T/C	FASTmrEMMA	6.7186	0.3006	2.66256e-08
Val	1216952343	A/G	FASTmrEMMA	6.1688	0.305	9.82879e-08
Val	900526550	T/C	FASTmrEMMA	4.0512	0.322	1.56567e-05
Val	208224693	A/T	FASTmrEMMA	3.8615	0.3308	2.47685e-05
Val	916065720	T/C	FASTmrEMMA	3.3062	0.3886	9.54333e-05
Val	402162015	G/A	FASTmrEMMA	5.2014	0.4062	9.87416e-07
Val	400763055	T/C	FASTmrEMMA	3.3236	0.4093	9.14745e-05
Val	401325122	T/G	FASTmrEMMA	7.6698	0.5009	2.79834e-09
Val	621015140	T/C	FASTmrEMMA	3.8416	0.5277	2.59896e-05
Val	803386795	A/G	FASTmrEMMA	5.8773	0.5315	1.96743e-07
Val	1009752934	A/T	FASTmrEMMA	6.2307	0.547	8.48399e-08
Val	220427406	A/C	FASTmrEMMA	4.6245	0.5618	3.9355e-06
Val	327975180	T/C	FASTmrEMMA	6.681	0.6028	2.91072e-08
Val	403651481	T/G	FASTmrEMMA	4.9324	0.6553	1.88018e-06
Val	715148749	T/C	FASTmrEMMA	3.7589	0.6769	3.17541e-05
Val	1118271739	A/G	FASTmrEMMA	5.6599	0.7416	3.30293e-07
Val	1114342676	A/G	FASTmrEMMA	6.0647	0.7999	1.25922e-07
Val	820430260	A/G	FASTmrEMMA	7.8961	0.8054	1.63908e-09
Val	1215098843	T/C	FASTmrEMMA	6.9041	0.8329	1.71475e-08
Val	908699540	T/C	FASTmrEMMA	5.5703	0.837	4.09072e-07
Val	306111685	A/G	FASTmrEMMA	5.4897	0.8471	4.95793e-07
Val	410241397	T/G	FASTmrEMMA	4.0147	0.8986	1.71002e-05
Val	1119369902	T/G	FASTmrEMMA	7.7951	0.9814	2.08065e-09
Val	206503587	G/C	FASTmrEMMA	3.9876	1.0052	1.82558e-05
Val	1106615810	T/G	FASTmrEMMA	4.4487	1.0258	6.0062e-06
Val	134603470	G/A	FASTmrEMMA	4.4425	1.0572	6.09677e-06
Val	431428481	T/C	FASTmrEMMA	3.3831	1.0576	7.91225e-05
Val	401468888	G/C	FASTmrEMMA	5.9099	1.0631	1.82012e-07
Val	517173970	A/T	FASTmrEMMA	12.1843	1.1004	6.85804e-14
Val	224287444	A/C	FASTmrEMMA	10.0388	1.2025	1.0522e-11
Val	110944343	A/G	FASTmrEMMA	8.2842	1.3283	6.55541e-10
Val	1209649709	A/C	FASTmrEMMA	8.9999	1.3532	1.21283e-10
Val	319946887	G/T	FASTmrEMMA	13.3334	1.3774	4.65801e-15
Val	1006628569	G/A	FASTmrEMMA	4.3629	1.7998	7.38414e-06
Val	610907458	T/C	FASTmrEMMA	3.5868	1.8295	4.82059e-05
Val	316127191	T/C	FASTmrEMMA	7.6936	1.8667	2.64545e-09
Val	621004835	T/C	FASTmrEMMA	4.7096	2.6269	3.20848e-06
Val	217386894	C/A	FASTmrEMMA	4.4226	2.7042	6.39588e-06
Val	319875326	C/G	FASTmrEMMA	6.2622	3.3301	7.87227e-08
Val	215377783	T/A	FASTmrEMMA	7.1229	4.842	1.02094e-08
Val	1216952343	A/G	pLARmEB	3.0549	5.3463e-07	0.000176319
Val	805062349	T/C	pLARmEB	4.622	5.6916e-07	3.96004e-06
Val	1100081227	C/T	pLARmEB	3.6546	6.1024e-07	4.08978e-05
Val	908699540	T/C	pLARmEB	3.9194	6.7237e-06	2.15328e-05
Val	627973253	A/G	pLARmEB	3.0713	8.5766e-05	0.000169395
Val	311706589	T/C	pLARmEB	3.0167	0.0001	0.000193642
Val	1009331364	T/C	pLARmEB	6.1507	0.0004	1.02612e-07
Val	1000219252	T/C	pLARmEB	3.4308	0.0074	7.04531e-05
Val	400763597	A/G	pLARmEB	3.327	0.0213	9.07194e-05
Val	507374649	A/G	pLARmEB	4.0562	0.0363	1.54703e-05
Val	517173970	A/T	pLARmEB	4.2564	0.105	9.54333e-06
Val	1021890529	G/A	pLARmEB	3.6842	0.2776	3.80627e-05
Val	504518287	A/G	pLARmEB	3.3896	0.3541	7.78753e-05
Val	140698445	A/G	pLARmEB	3.6362	0.3841	4.27661e-05
Val	1000738035	T/C	pLARmEB	4.7404	0.4018	2.97989e-06
Val	517298311	A/T	pLARmEB	4.4708	0.4199	5.69508e-06
Val	816852147	T/G	pLARmEB	3.0865	0.465	0.000163192
Val	622670368	C/T	pLARmEB	6.2477	0.6701	8.14704e-08
Val	1004962980	T/C	pLARmEB	10.4464	0.7296	4.03831e-12
Val	519754561	C/A	pLARmEB	3.1794	0.7972	0.000130047
Val	821385038	T/C	pLARmEB	5.8941	0.8783	1.89017e-07
Val	907407814	T/C	pLARmEB	3.2749	0.9735	0.000102991
Val	826326431	C/T	pLARmEB	3.6025	1.2916	4.64088e-05
Val	216376081	A/T	pLARmEB	6.048	1.3336	1.31009e-07
Val	1118860042	A/C	pLARmEB	5.5027	1.4792	4.80618e-07
Val	900526550	T/C	pLARmEB	5.2212	1.6085	9.41673e-07
Val	224287444	A/C	pLARmEB	8.3572	1.6117	5.51823e-10
Val	1215098843	T/C	pLARmEB	3.8812	1.6368	2.36157e-05
Val	401792275	A/G	pLARmEB	5.5326	1.6969	4.47507e-07
Val	618538935	T/C	pLARmEB	5.6458	1.9044	3.41586e-07
Val	501830267	T/C	pLARmEB	4.7249	2.1073	3.09243e-06
Val	400762059	G/T	pLARmEB	4.3628	2.1451	7.38584e-06
Val	610907458	T/C	pLARmEB	4.0294	2.148	1.65044e-05
Val	715148749	T/C	pLARmEB	4.0697	2.3891	1.49727e-05
Val	110944343	A/G	pLARmEB	9.7629	3.6914	2.0128e-11
Val	1007930450	T/C	pLARmEB	3.0773	4.9498	0.000166917
Val	827240079	A/T	pLARmEB	7.2649	6.2437	7.2929e-09
Val	615937457	G/A	pLARmEB	8.1217	7.6391	9.62055e-10
Val	1215098843	T/C	pKWmEB	3.8087	0.7922	2.81449e-05
Val	702925240	T/C	pKWmEB	3.3253	0.9964	9.10961e-05
Val	325430033	T/A	pKWmEB	4.0272	1.1684	1.6592e-05
Val	918724630	C/T	pKWmEB	3.344	1.2272	8.70362e-05
Val	401448842	C/T	pKWmEB	3.11	1.6105	0.000154099
Val	717627459	A/G	pKWmEB	3.7086	1.8582	3.58757e-05
Val	821385038	T/C	pKWmEB	3.7189	1.8582	3.49865e-05
Val	402162015	G/A	pKWmEB	5.1847	2.1381	1.02778e-06
Val	400762059	G/T	pKWmEB	5.4827	2.1966	5.04197e-07
Val	817502749	T/G	pKWmEB	5.4629	2.1994	5.28567e-07
Val	916065720	T/C	pKWmEB	5.5651	2.2482	4.14095e-07
Val	1213792219	G/A	pKWmEB	3.398	2.2606	7.62957e-05
Val	1208267943	T/A	pKWmEB	4.8036	2.4887	2.56035e-06
Val	124304555	T/C	pKWmEB	3.5945	2.4902	4.73151e-05
Val	1120169910	A/G	pKWmEB	3.3998	2.5008	7.59626e-05
Val	1008684777	G/A	pKWmEB	4.1804	2.7388	1.1463e-05
Val	400763597	A/G	pKWmEB	4.2271	2.9449	1.02424e-05
Val	110944343	A/G	pKWmEB	4.0948	3.8662	1.40929e-05
Val	311706589	T/C	pKWmEB	4.727	4.0276	3.07681e-06
Val	519135770	A/G	pKWmEB	9.2025	4.0304	7.52489e-11
Val	401468888	G/C	pKWmEB	5.7726	4.7571	2.52464e-07
Val	1208267925	A/G	ISIS EM-BLASSO	3.2215	0.9781	0.000117328
Val	402162015	G/A	ISIS EM-BLASSO	4.6286	1.5905	3.89762e-06
Val	400763597	A/G	ISIS EM-BLASSO	4.2285	2.2165	1.0207e-05
Val	519137732	G/C	ISIS EM-BLASSO	5.3841	3.1943	6.3797e-07
Val	401468888	G/C	ISIS EM-BLASSO	5.0676	4.187	1.36019e-06
Leu	131879824	T/C	3VmrMLM	10.1091	0.8131	8.91946e-12
Leu	1005632537	A/G	3VmrMLM	10.3158	0.8144	5.48784e-12
Leu	123419417	C/T	3VmrMLM	11.0822	0.8289	9.07929e-13
Leu	521809510	C/T	3VmrMLM	11.2482	0.8309	6.15225e-13
Leu	1208631432	T/C	3VmrMLM	11.854	0.8529	1.48661e-13
Leu	400925219	A/G	3VmrMLM	4.3911	0.8736	6.89959e-06
Leu	410197947	G/A	3VmrMLM	7.3684	0.9493	5.70927e-09
Leu	900239306	T/C	3VmrMLM	7.5729	0.9813	3.519e-09
Leu	224189963	C/T	3VmrMLM	11.0512	1.0449	9.764e-13
Leu	403541697	A/G	3VmrMLM	10.2211	1.0595	6.85571e-12
Leu	818176421	T/A	3VmrMLM	11.1869	1.0769	7.10276e-13
Leu	106765173	A/G	3VmrMLM	8.6868	1.0993	2.53597e-10
Leu	721814672	G/T	3VmrMLM	15.8454	1.0997	1.31759e-17
Leu	1123571310	C/T	3VmrMLM	4.2941	1.1021	8.71466e-06
Leu	1005473583	A/G	3VmrMLM	8.0292	1.1514	1.19698e-09
Leu	1125632906	C/T	3VmrMLM	17.6172	1.2122	2.11628e-19
Leu	225758513	T/C	3VmrMLM	12.9803	1.297	1.0639e-14
Leu	134820524	C/T	3VmrMLM	10.9884	1.4111	1.13146e-12
Leu	408365015	C/T	3VmrMLM	10.2738	1.4204	6.05749e-12
Leu	909185316	C/G	3VmrMLM	7.8402	1.9386	1.87042e-09
Leu	417370491	T/C	3VmrMLM	10.5548	2.0352	3.13121e-12
Leu	709920520	A/G	3VmrMLM	27.2425	2.3564	4.05319e-29
Leu	233500728	G/A	3VmrMLM	30.6096	2.3679	1.64416e-32
Leu	1000219252	T/C	3VmrMLM	8.6821	2.6654	2.56434e-10
Leu	611661459	C/T	3VmrMLM	9.5946	2.6735	2.99028e-11
Leu	800963174	C/A	3VmrMLM	21.1725	2.8168	5.38682e-23
Leu	321800790	T/G	3VmrMLM	37.8024	3.4161	9.50752e-40
Leu	523533644	C/A	3VmrMLM	11.0165	3.5365	1.05926e-12
Leu	401468909	C/T	3VmrMLM	13.5903	3.737	2.55377e-15
Leu	1214378056	G/A	3VmrMLM	15.551	4.2524	2.61924e-17
Leu	110944343	A/G	3VmrMLM	30.7445	6.948	1.2023e-32
Leu	107089989	T/G	FarmCPU		0.248286	8.55612e-09
Leu	110944343	A/G	FarmCPU		0.256851	1.32429e-10
Leu	229803303	T/C	FarmCPU		0.330811	1.18241e-10
Leu	401468909	C/T	FarmCPU		0.172054	1.58491e-11
Leu	709210031	A/G	FarmCPU		0.246275	1.79921e-09
Leu	713835566	A/G	FarmCPU		0.175037	6.54011e-09
Leu	1207716974	A/C	mrMLM	3.3168	0.8544	9.30037e-05
Leu	1217734325	G/T	mrMLM	3.1605	1.0235	0.000136207
Leu	415382956	A/G	mrMLM	3.0101	1.0581	0.000196789
Leu	123419417	C/T	mrMLM	3.2269	1.2168	0.000115798
Leu	627988537	C/T	mrMLM	5.1088	1.3207	1.23225e-06
Leu	903657464	G/T	mrMLM	4.3966	1.3491	6.80769e-06
Leu	408365015	C/T	mrMLM	4.1567	1.3799	1.21367e-05
Leu	908668030	C/T	mrMLM	4.2787	1.5161	9.04482e-06
Leu	1008554431	A/G	mrMLM	3.2518	1.6806	0.000108968
Leu	110944343	A/G	mrMLM	4.4571	1.9447	5.88573e-06
Leu	1005473583	A/G	mrMLM	5.6556	1.9646	3.33734e-07
Leu	1001683982	A/G	mrMLM	3.2099	2.3243	0.000120698
Leu	321140346	A/G	mrMLM	4.9033	2.431	2.01604e-06
Leu	614976782	G/T	mrMLM	5.2522	2.4314	8.74581e-07
Leu	815022176	G/A	mrMLM	5.6792	2.6227	3.15428e-07
Leu	107089989	T/G	mrMLM	7.3489	2.7711	5.97861e-09
Leu	900276789	T/C	mrMLM	4.4304	2.8288	6.27625e-06
Leu	404962698	T/C	mrMLM	6.7967	3.1144	2.21208e-08
Leu	1204320467	T/C	mrMLM	3.9159	3.1705	2.1712e-05
Leu	401468909	C/T	mrMLM	10.4973	3.505	3.58344e-12
Leu	718050376	G/A	mrMLM	7.6227	3.6016	3.12824e-09
Leu	216343968	G/T	mrMLM	6.9075	3.6525	1.70098e-08
Leu	1215687651	A/G	mrMLM	8.6163	5.3035	2.99502e-10
Leu	214169770	T/C	mrMLM	7.8478	16.8554	1.83738e-09
Leu	224268195	A/G	FASTmrMLM	3.0961	8.4779e-09	0.000159404
Leu	225758513	T/C	FASTmrMLM	3.2988	8.649e-06	9.71628e-05
Leu	107089149	A/C	FASTmrMLM	3.7211	0.0275	3.48017e-05
Leu	627988537	C/T	FASTmrMLM	3.3347	0.1561	8.90225e-05
Leu	1207716974	A/C	FASTmrMLM	3.6328	0.1618	4.31122e-05
Leu	521695176	G/A	FASTmrMLM	3.3078	0.263	9.50605e-05
Leu	427305289	T/C	FASTmrMLM	4.2315	0.4525	1.01344e-05
Leu	1121139081	G/A	FASTmrMLM	3.7353	0.4801	3.36279e-05
Leu	1126762466	T/G	FASTmrMLM	4.1873	0.5056	1.12746e-05
Leu	900239306	T/C	FASTmrMLM	5.1971	0.5498	9.977e-07
Leu	1218996525	T/C	FASTmrMLM	3.1436	0.6187	0.000141938
Leu	1106990258	C/G	FASTmrMLM	3.4553	0.8692	6.63743e-05
Leu	1112688223	A/G	FASTmrMLM	3.39	0.9311	7.78037e-05
Leu	1227285364	T/C	FASTmrMLM	4.606	1.1304	4.11434e-06
Leu	410197947	G/A	FASTmrMLM	3.8711	1.1422	2.41991e-05
Leu	207161476	T/A	FASTmrMLM	4.2705	1.2017	9.22359e-06
Leu	1005632537	A/G	FASTmrMLM	5.108	1.2518	1.23481e-06
Leu	134820524	C/T	FASTmrMLM	7.3933	1.3786	5.38146e-09
Leu	519131444	G/C	FASTmrMLM	4.6058	2.144	4.11718e-06
Leu	110944343	A/G	FASTmrMLM	6.8362	3.6323	2.01419e-08
Leu	401468909	C/T	FASTmrMLM	6.6473	3.6667	3.15355e-08
Leu	517546161	T/C	FASTmrEMMA	3.2621	0.0071	0.000106267
Leu	415382956	A/G	FASTmrEMMA	3.1426	0.0278	0.000142298
Leu	416188896	A/T	FASTmrEMMA	4.128	0.0548	1.30077e-05
Leu	1103635189	T/C	FASTmrEMMA	3.0729	0.1862	0.000168733
Leu	1127580274	T/G	FASTmrEMMA	4.0667	0.2307	1.508e-05
Leu	314332375	T/G	FASTmrEMMA	4.6939	0.3038	3.33119e-06
Leu	814574639	A/G	FASTmrEMMA	4.0134	0.3158	1.71554e-05
Leu	624426552	T/C	FASTmrEMMA	3.1875	0.3249	0.000127497
Leu	1111948179	T/C	FASTmrEMMA	3.0499	0.4119	0.000178525
Leu	141665876	A/G	FASTmrEMMA	3.2193	0.4244	0.000117978
Leu	1227285364	T/C	FASTmrEMMA	4.5458	0.4273	4.75445e-06
Leu	105392860	A/C	FASTmrEMMA	5.5047	0.4342	4.7841e-07
Leu	410241397	T/G	FASTmrEMMA	3.4062	0.4732	7.47997e-05
Leu	224189963	C/T	FASTmrEMMA	4.9076	0.545	1.99526e-06
Leu	908668030	C/T	FASTmrEMMA	4.0987	0.5529	1.39605e-05
Leu	207161476	T/A	FASTmrEMMA	3.8137	0.6084	2.78035e-05
Leu	910882418	G/A	FASTmrEMMA	4.3977	0.6185	6.79047e-06
Leu	621004835	T/C	FASTmrEMMA	4.1768	0.6708	1.15611e-05
Leu	912484533	G/A	FASTmrEMMA	3.4807	0.8487	6.24022e-05
Leu	308269284	A/G	FASTmrEMMA	4.7314	0.8498	3.04509e-06
Leu	714367293	C/T	FASTmrEMMA	6.1036	0.8967	1.14789e-07
Leu	905438329	T/C	FASTmrEMMA	5.2823	0.8994	8.13767e-07
Leu	606117390	G/A	FASTmrEMMA	6.9367	0.9087	1.58708e-08
Leu	1013945857	T/C	FASTmrEMMA	3.6933	0.9846	3.72306e-05
Leu	521096279	T/C	FASTmrEMMA	5.5686	1.0121	4.10677e-07
Leu	603711281	A/G	FASTmrEMMA	7.2189	1.0257	8.13205e-09
Leu	900526550	T/C	FASTmrEMMA	5.498	1.0405	4.86071e-07
Leu	326607548	A/G	FASTmrEMMA	6.0178	1.0885	1.40799e-07
Leu	205822556	C/A	FASTmrEMMA	4.3448	1.1531	7.71259e-06
Leu	523533644	C/A	FASTmrEMMA	3.1467	1.1695	0.000140864
Leu	519040722	T/C	FASTmrEMMA	4.9152	1.1846	1.9593e-06
Leu	226433561	C/T	FASTmrEMMA	7.1473	1.225	9.63607e-09
Leu	134820524	C/T	FASTmrEMMA	5.7164	1.4652	2.88669e-07
Leu	110944343	A/G	FASTmrEMMA	4.4802	1.8745	5.56801e-06
Leu	803386795	A/G	FASTmrEMMA	12.3729	2.0019	4.40859e-14
Leu	1116377100	T/C	FASTmrEMMA	14.8698	2.0176	1.28469e-16
Leu	1225307027	T/C	FASTmrEMMA	8.5207	2.0881	3.75232e-10
Leu	725132782	C/T	FASTmrEMMA	5.2076	2.4905	9.72971e-07
Leu	401468892	A/G	FASTmrEMMA	9.8573	2.9661	1.61213e-11
Leu	410948466	T/C	FASTmrEMMA	11.4302	3.1704	4.01421e-13
Leu	827240079	A/T	FASTmrEMMA	10.6192	3.7723	2.69153e-12
Leu	229232715	A/C	FASTmrEMMA	11.9897	6.3755	1.08168e-13
Leu	1215528602	A/G	FASTmrEMMA	24.0145	8.3869	7.28954e-26
Leu	1215313243	G/C	pLARmEB	3.3508	0.3173	8.56052e-05
Leu	1005993671	T/C	pLARmEB	3.2138	0.6292	0.000119564
Leu	1214378056	G/A	pLARmEB	3.0876	0.6921	0.00016278
Leu	408365015	C/T	pLARmEB	4.1795	0.7461	1.14868e-05
Leu	401697011	G/A	pLARmEB	3.6739	0.8064	3.90211e-05
Leu	808449979	G/A	pLARmEB	3.9687	1.0399	1.91117e-05
Leu	326835680	A/G	pLARmEB	4.7637	1.043	2.81773e-06
Leu	106556586	C/A	pLARmEB	4.5479	1.1825	4.73151e-06
Leu	427305289	T/C	pLARmEB	7.2186	1.2829	8.13954e-09
Leu	107089989	T/G	pLARmEB	5.3963	1.2875	6.19726e-07
Leu	1117144533	T/A	pLARmEB	4.2126	1.3322	1.06072e-05
Leu	134820524	C/T	pLARmEB	8.3816	1.3691	5.20955e-10
Leu	918724630	C/T	pLARmEB	7.3061	1.4143	6.61607e-09
Leu	1208631432	T/C	pLARmEB	5.5179	1.5518	4.63554e-07
Leu	809539533	C/T	pLARmEB	4.4942	1.5573	5.38394e-06
Leu	524778418	A/G	pLARmEB	3.7574	1.7913	3.18713e-05
Leu	520795812	T/C	pLARmEB	6.8799	2.12	1.81593e-08
Leu	708680072	C/T	pLARmEB	3.0792	2.2257	0.00016615
Leu	401468909	C/T	pLARmEB	7.4249	2.4652	4.99459e-09
Leu	600872512	A/G	pLARmEB	9.9524	2.7592	1.28914e-11
Leu	110944343	A/G	pLARmEB	7.0323	3.5477	1.26532e-08
Leu	1215352616	T/G	pLARmEB	9.4971	4.8759	3.76184e-11
Leu	827240079	A/T	pLARmEB	9.1198	14.3855	9.14324e-11
Leu	1208267943	T/A	pKWmEB	3.4708	1.3703	6.39146e-05
Leu	1005632537	A/G	pKWmEB	4.9781	1.9945	1.68539e-06
Leu	1106020171	G/A	pKWmEB	3.9181	2.0169	2.15973e-05
Leu	1208631432	T/C	pKWmEB	4.8064	2.1189	2.54331e-06
Leu	134820524	C/T	pKWmEB	4.6778	2.3177	3.46258e-06
Leu	403199659	A/G	pKWmEB	6.4811	2.5561	4.67843e-08
Leu	918724630	C/T	pKWmEB	3.7031	2.6094	3.6358e-05
Leu	434755453	T/C	pKWmEB	4.1488	2.828	1.23709e-05
Leu	225250614	T/G	pKWmEB	4.812	2.8848	2.50957e-06
Leu	808450405	T/A	pKWmEB	5.2439	3.1606	8.92072e-07
Leu	401468892	A/G	pKWmEB	3.0846	4.4305	0.000163983
Leu	1117086496	A/G	pKWmEB	5.4207	5.1051	5.84655e-07
Leu	110944343	A/G	pKWmEB	3.3786	10.4556	8.00018e-05
Leu	1214378056	G/A	ISIS EM-BLASSO	4.2291	1.9739	1.0193e-05
Leu	216490633	G/A	ISIS EM-BLASSO	3.0062	1.9889	0.000198655
Leu	233500728	G/A	ISIS EM-BLASSO	3.7899	2.0063	2.94578e-05
Leu	106556586	C/A	ISIS EM-BLASSO	4.0364	2.0098	1.62256e-05
Leu	1208631432	T/C	ISIS EM-BLASSO	4.3904	2.2973	6.91035e-06
Leu	708362470	A/T	ISIS EM-BLASSO	7.5142	6.892	4.04297e-09
Leu	401468909	C/T	ISIS EM-BLASSO	10.6522	6.8933	2.49115e-12
Ile	1121411812	T/C	3VmrMLM	3.0387	0.8564	0.000183493
Ile	224189963	C/T	3VmrMLM	10.0249	0.9084	1.08722e-11
Ile	418136896	T/G	3VmrMLM	8.7917	0.9339	1.98029e-10
Ile	800953534	A/G	3VmrMLM	8.1011	0.9578	1.00992e-09
Ile	1207716974	A/C	3VmrMLM	13.5196	1.0514	3.01319e-15
Ile	1227285364	T/C	3VmrMLM	6.6621	1.2143	3.04426e-08
Ile	123419417	C/T	3VmrMLM	17.8558	1.3335	1.21372e-19
Ile	408365015	C/T	3VmrMLM	10.4481	1.393	4.0227e-12
Ile	423202902	T/C	3VmrMLM	8.881	1.4473	1.60457e-10
Ile	1122556199	T/G	3VmrMLM	29.8468	1.4581	9.64104e-32
Ile	1008684777	G/A	3VmrMLM	15.4251	1.5119	3.51412e-17
Ile	721384633	A/G	3VmrMLM	5.4697	1.5285	5.20029e-07
Ile	721814672	G/T	3VmrMLM	22.6364	1.5692	1.79196e-24
Ile	1123275986	G/A	3VmrMLM	5.9725	1.6667	1.56806e-07
Ile	1212656529	T/C	3VmrMLM	7.0661	1.7138	1.16811e-08
Ile	412895359	A/G	3VmrMLM	23.1581	1.8056	5.33032e-25
Ile	1000959211	A/G	3VmrMLM	7.7254	1.8176	2.45356e-09
Ile	727488911	G/C	3VmrMLM	11.5846	1.9361	2.79538e-13
Ile	1005471531	G/A	3VmrMLM	14.301	2.0418	4.85101e-16
Ile	1216034647	A/G	3VmrMLM	7.2616	2.1326	7.3504e-09
Ile	1008138238	A/G	3VmrMLM	20.6779	2.1548	1.70217e-22
Ile	1017905052	C/T	3VmrMLM	11.3787	2.1998	4.52959e-13
Ile	434755453	T/C	3VmrMLM	25.8016	2.2017	1.14888e-27
Ile	1127910501	G/A	3VmrMLM	7.6462	2.2305	2.95856e-09
Ile	621015140	T/C	3VmrMLM	32.1267	2.3336	4.88033e-34
Ile	508334273	C/T	3VmrMLM	10.2609	2.5316	6.24427e-12
Ile	708680072	C/T	3VmrMLM	9.6479	2.6696	2.63825e-11
Ile	223416746	C/T	3VmrMLM	11.0688	2.8028	9.37003e-13
Ile	519754561	C/A	3VmrMLM	13.4394	3.2622	3.63472e-15
Ile	1217047868	A/C	3VmrMLM	17.2101	3.3099	5.46524e-19
Ile	110944343	A/G	3VmrMLM	21.7149	4.5044	1.52626e-23
Ile	315484798	C/T	3VmrMLM	20.4204	5.8599	3.09818e-22
Ile	107646091	C/A	FarmCPU		0.466598	4.11121e-09
Ile	110944343	A/G	FarmCPU		0.300616	7.0729e-11
Ile	224189963	C/T	FarmCPU		0.160789	8.84075e-09
Ile	434516031	C/A	FarmCPU		0.501309	2.63805e-09
Ile	800968132	A/C	FarmCPU		0.177688	1.84561e-09
Ile	815978346	T/C	FarmCPU		0.181543	4.25355e-10
Ile	1008138230	A/G	FarmCPU		0.157569	1.14937e-08
Ile	1102723639	T/C	FarmCPU		0.228578	5.90837e-10
Ile	1127910502	A/T	FarmCPU		0.169485	3.37515e-11
Ile	134820524	C/T	mrMLM	3.4949	0.5474	6.02698e-05
Ile	415382956	A/G	mrMLM	3.7451	0.6391	3.28322e-05
Ile	707295540	C/T	mrMLM	5.0885	0.7721	1.2936e-06
Ile	1122660152	A/G	mrMLM	4.167	0.7902	1.18386e-05
Ile	910882418	G/A	mrMLM	4.5218	0.8484	5.03733e-06
Ile	819140004	T/G	mrMLM	3.8281	0.8499	2.68534e-05
Ile	1002941398	T/C	mrMLM	3.2144	0.8619	0.000119399
Ile	1104481339	G/A	mrMLM	3.84	0.8763	2.60916e-05
Ile	1208321827	A/C	mrMLM	4.3595	0.8767	7.44389e-06
Ile	916962115	T/G	mrMLM	3.4794	0.9148	6.25893e-05
Ile	1116996306	G/A	mrMLM	4.0921	0.9933	1.4184e-05
Ile	425554299	T/C	mrMLM	4.2726	0.998	9.17698e-06
Ile	621015140	T/C	mrMLM	4.28	1.03	9.01571e-06
Ile	1127910501	G/A	mrMLM	6.2212	1.0509	8.67761e-08
Ile	128716566	T/C	mrMLM	4.9289	1.0706	1.89627e-06
Ile	308241990	C/G	mrMLM	4.2123	1.1446	1.06145e-05
Ile	1017905052	C/T	mrMLM	4.7232	1.2354	3.10527e-06
Ile	1106018861	G/A	mrMLM	6.1159	1.2903	1.11481e-07
Ile	1121139081	G/A	pKWmEB	3.2373	1.3873	0.000112902
Ile	1216539620	G/A	mrMLM	4.8616	1.6103	2.22792e-06
Ile	110944343	A/G	mrMLM	3.3905	1.6193	7.77141e-05
Ile	603548007	A/G	mrMLM	8.4971	1.6845	3.96643e-10
Ile	519706515	A/G	mrMLM	7.7082	1.7837	2.55564e-09
Ile	134820524	C/T	pKWmEB	5.0063	1.8477	1.57507e-06
Ile	1008684777	G/A	pKWmEB	4.0901	1.8553	1.42528e-05
Ile	503093978	A/G	mrMLM	4.3287	1.8848	8.01678e-06
Ile	1118552090	A/G	mrMLM	7.7212	1.9468	2.47799e-09
Ile	1005632537	A/G	pKWmEB	3.2546	2.0252	0.000108218
Ile	604831398	C/A	mrMLM	6.9188	2.0598	1.65615e-08
Ile	1214762331	A/T	pKWmEB	4.4123	2.0859	6.55541e-06
Ile	1202038293	A/T	pKWmEB	3.6415	2.143	4.22182e-05
Ile	1121411812	T/C	pKWmEB	5.3799	2.3511	6.44466e-07
Ile	412895359	A/G	pKWmEB	4.885	2.354	2.10669e-06
Ile	805021870	A/G	mrMLM	6.4501	2.6067	5.03617e-08
Ile	1208267943	T/A	pKWmEB	4.3581	2.6293	7.46965e-06
Ile	134428638	C/A	mrMLM	5.8944	2.7911	1.88886e-07
Ile	721384315	G/T	pKWmEB	3.5303	2.8328	5.53095e-05
Ile	1104274267	C/T	pKWmEB	6.6991	2.9041	2.78869e-08
Ile	107646091	C/A	mrMLM	5.8321	2.9054	2.19079e-07
Ile	224189963	C/T	FASTmrMLM	3.2351	0.3693	0.000113501
Ile	1005632537	A/G	FASTmrMLM	3.2323	0.4277	0.000114288
Ile	1208321827	A/C	FASTmrMLM	4.1366	0.4951	1.27409e-05
Ile	1127580274	T/G	FASTmrMLM	4.0058	0.5598	1.74703e-05
Ile	418136896	T/G	FASTmrMLM	3.0566	0.5707	0.00017559
Ile	123419417	C/T	FASTmrMLM	3.1519	0.5931	0.000139091
Ile	910882418	G/A	FASTmrMLM	5.1741	0.6334	1.05414e-06
Ile	1117180756	A/G	FASTmrMLM	3.1337	0.7192	0.000145412
Ile	1112688223	A/G	FASTmrMLM	5.1569	0.7777	1.09825e-06
Ile	226505246	C/G	FASTmrMLM	3.7385	0.8111	3.33657e-05
Ile	526969954	A/C	FASTmrMLM	4.0212	0.8455	1.68345e-05
Ile	225320174	T/G	FASTmrMLM	4.3287	0.8917	8.01678e-06
Ile	1122660152	A/G	FASTmrMLM	4.2375	0.9379	9.98849e-06
Ile	624090346	T/C	FASTmrMLM	3.534	0.9849	5.48151e-05
Ile	517183985	T/G	FASTmrMLM	3.7424	0.9926	3.30522e-05
Ile	601062402	G/A	FASTmrMLM	3.4161	1.0334	7.3013e-05
Ile	1214317841	G/A	FASTmrMLM	5.0272	1.044	1.4983e-06
Ile	403199659	A/G	FASTmrMLM	5.7754	1.0466	2.50784e-07
Ile	523533644	C/A	FASTmrMLM	5.1821	1.168	1.03419e-06
Ile	434755453	T/C	FASTmrMLM	4.9698	1.1782	1.7191e-06
Ile	1208631432	T/C	FASTmrMLM	5.5369	1.2624	4.42996e-07
Ile	412895359	A/G	FASTmrMLM	6.4958	1.2973	4.51856e-08
Ile	1121411812	T/C	FASTmrMLM	4.101	1.3045	1.38835e-05
Ile	918724630	C/T	FASTmrMLM	5.5132	1.3589	4.68705e-07
Ile	403600962	G/A	FASTmrMLM	6.5839	1.4168	3.66522e-08
Ile	1106310936	G/T	FASTmrMLM	6.9106	1.4489	1.6885e-08
Ile	1005473583	A/G	FASTmrMLM	5.4682	1.4773	5.21915e-07
Ile	621015140	T/C	FASTmrMLM	5.4372	1.5092	5.62082e-07
Ile	907438310	A/G	FASTmrMLM	5.2655	1.5167	8.47032e-07
Ile	519754561	C/A	FASTmrMLM	6.1602	1.7069	1.00323e-07
Ile	401468888	G/C	FASTmrMLM	4.9148	2.5124	1.9611e-06
Ile	110944343	A/G	FASTmrMLM	5.7245	4.4331	2.83139e-07
Ile	908699547	C/A	FASTmrEMMA	3.0313	0.0014	0.00018681
Ile	1207716974	A/C	FASTmrEMMA	3.6046	0.024	4.61636e-05
Ile	1013371590	T/C	FASTmrEMMA	3.7123	0.0574	3.55549e-05
Ile	427305289	T/C	FASTmrEMMA	4.9123	0.0631	1.97288e-06
Ile	1103441584	T/C	FASTmrEMMA	4.4773	0.1963	5.60661e-06
Ile	1123566113	A/G	FASTmrEMMA	4.9418	0.3139	1.83823e-06
Ile	1008138230	A/G	FASTmrEMMA	4.8906	0.3434	2.07826e-06
Ile	325256157	G/A	FASTmrEMMA	3.4603	0.359	6.55692e-05
Ile	615507996	T/C	FASTmrEMMA	3.1007	0.3596	0.000157652
Ile	907071543	T/C	FASTmrEMMA	4.4525	0.3599	5.95114e-06
Ile	613089533	C/T	FASTmrEMMA	6.1475	0.4194	1.03395e-07
Ile	621004835	T/C	FASTmrEMMA	8.4607	0.427	4.32215e-10
Ile	229839591	G/A	FASTmrEMMA	4.7753	0.4473	2.74094e-06
Ile	816048338	A/G	FASTmrEMMA	4.3663	0.4581	7.32318e-06
Ile	105392860	A/C	FASTmrEMMA	8.3654	0.6013	5.41128e-10
Ile	407693448	A/C	FASTmrEMMA	3.0096	0.6121	0.000197015
Ile	331485595	C/A	FASTmrEMMA	9.0385	0.7029	1.10713e-10
Ile	1118552090	A/G	FASTmrEMMA	5.3737	0.7234	6.54034e-07
Ile	224189963	C/T	FASTmrEMMA	5.3713	0.7277	6.57809e-07
Ile	517183985	T/G	FASTmrEMMA	6.5199	0.7312	4.26678e-08
Ile	106485018	T/C	FASTmrEMMA	3.1987	0.7419	0.000124051
Ile	907438341	A/G	FASTmrEMMA	4.1211	0.8085	1.32282e-05
Ile	519754561	C/A	FASTmrEMMA	4.147	0.8855	1.24251e-05
Ile	900526550	T/C	FASTmrEMMA	3.9285	0.8904	2.1062e-05
Ile	905438329	T/C	FASTmrEMMA	3.6467	0.9726	4.16869e-05
Ile	134820524	C/T	FASTmrEMMA	5.671	1.1698	3.21662e-07
Ile	722990681	A/G	FASTmrEMMA	4.0894	1.2115	1.42758e-05
Ile	803386795	A/G	FASTmrEMMA	6.8461	1.2524	1.96743e-08
Ile	1008684777	G/A	FASTmrEMMA	3.1638	1.2867	0.000135114
Ile	1122358024	G/A	FASTmrEMMA	6.1604	1.3638	1.00277e-07
Ile	1017905052	C/T	FASTmrEMMA	9.1349	1.3944	8.82267e-11
Ile	523533644	C/A	FASTmrEMMA	4.356	1.506	7.50758e-06
Ile	827240079	A/T	FASTmrEMMA	6.6529	2.0266	3.11172e-08
Ile	225339692	T/C	FASTmrEMMA	10.5308	2.1294	3.31284e-12
Ile	603711281	A/G	FASTmrEMMA	15.1605	2.2718	6.51628e-17
Ile	503100565	G/A	FASTmrEMMA	11.2104	2.3328	6.72202e-13
Ile	122938304	A/C	FASTmrEMMA	4.6395	2.372	3.79665e-06
Ile	1007876051	T/A	FASTmrEMMA	3.744	3.3966	3.2923e-05
Ile	110944343	A/G	FASTmrEMMA	5.7161	3.4192	2.88868e-07
Ile	524101391	C/T	FASTmrEMMA	5.5969	5.6091	3.83884e-07
Ile	521026885	A/T	pLARmEB	3.3896	1.9786e-06	7.78753e-05
Ile	326835680	A/G	pLARmEB	3.6221	2.4606e-06	4.42486e-05
Ile	1217813689	C/T	pLARmEB	3.8871	0.2648	2.32809e-05
Ile	504518287	A/G	pLARmEB	4.9146	0.3761	1.962e-06
Ile	913511230	T/C	pLARmEB	4.5154	0.449	5.11564e-06
Ile	311706589	T/C	pLARmEB	3.2813	0.4536	0.000101414
Ile	412895359	A/G	pLARmEB	4.5646	0.4544	4.54569e-06
Ile	1122556199	T/G	pLARmEB	4.008	0.4681	1.7378e-05
Ile	603711281	A/G	pLARmEB	6.0099	0.4787	1.4345e-07
Ile	217145274	T/C	pLARmEB	4.625	0.4964	3.93097e-06
Ile	400763597	A/G	pLARmEB	4.1868	0.5469	1.12876e-05
Ile	434755453	T/C	pLARmEB	4.0206	0.5509	1.68578e-05
Ile	1005632537	A/G	pLARmEB	5.1903	0.557	1.01391e-06
Ile	910882418	G/A	pLARmEB	4.6471	0.5943	3.72821e-06
Ile	403199659	A/G	pLARmEB	5.9183	0.6465	1.78443e-07
Ile	1208631432	T/C	pLARmEB	3.226	0.7185	0.000116065
Ile	901381832	A/G	pLARmEB	4.7825	0.7447	2.69339e-06
Ile	226505246	C/G	pLARmEB	7.6288	0.9932	3.08319e-09
Ile	708680072	C/T	pLARmEB	3.2353	1.0078	0.000113449
Ile	729245139	T/C	pLARmEB	4.158	1.0422	1.21004e-05
Ile	1000960708	A/G	pLARmEB	4.9452	1.0449	1.82348e-06
Ile	425554299	T/C	pLARmEB	6.6543	1.3431	3.1017e-08
Ile	519758708	T/C	pLARmEB	7.0396	1.3909	1.24366e-08
Ile	223416746	C/T	pLARmEB	7.2664	1.6348	7.26775e-09
Ile	805021870	A/G	pLARmEB	3.044	1.7578	0.000181092
Ile	621015140	T/C	pLARmEB	5.4737	1.7728	5.1511e-07
Ile	517727178	G/T	pLARmEB	9.5738	1.9437	3.14051e-11
Ile	825961358	G/A	pLARmEB	3.5355	2.1508	5.46135e-05
Ile	115521236	G/A	pLARmEB	7.3482	2.1881	5.98825e-09
Ile	714012735	G/A	pLARmEB	4.9833	2.2664	1.66418e-06
Ile	110944343	A/G	pLARmEB	6.939	2.6169	1.5787e-08
Ile	503093978	A/G	pLARmEB	7.2662	2.7061	7.2711e-09
Ile	300374979	A/C	pLARmEB	3.2132	2.8255	0.000119729
Ile	107646091	C/A	pLARmEB	5.2656	3.9786	8.46837e-07
Ile	514578075	A/G	pLARmEB	14.7891	4.7424	1.55096e-16
Ile	220293741	T/C	pKWmEB	3.9263	2.9538	2.11739e-05
Ile	514578075	A/G	mrMLM	5.2981	3.2398	7.8361e-07
Ile	432959499	G/A	mrMLM	8.8148	3.3516	1.87543e-10
Ile	1208631432	T/C	pKWmEB	6.7507	3.3556	2.46718e-08
Ile	902262394	T/C	mrMLM	3.7262	3.4322	3.43716e-05
Ile	114865946	T/G	mrMLM	4.123	3.4402	1.31644e-05
Ile	434516031	C/A	mrMLM	6.5258	3.5454	4.20727e-08
Ile	825961358	G/A	mrMLM	8.8706	3.7604	1.64437e-10
Ile	1001683982	A/G	mrMLM	6.0009	4.1845	1.46555e-07
Ile	1007878671	A/G	mrMLM	5.3989	4.3601	6.15886e-07
Ile	816924940	A/G	pKWmEB	4.6037	4.8925	4.13714e-06
Ile	122963986	T/G	mrMLM	6.4314	5.2748	5.26502e-08
Ile	827240079	A/T	mrMLM	3.8108	5.7303	2.80027e-05
Ile	611511780	A/G	mrMLM	7.0121	6.6649	1.32739e-08
Ile	110944343	A/G	pKWmEB	9.1016	6.7597	9.54333e-11
Ile	815978346	T/C	ISIS EM-BLASSO	3.0522	3.6887	0.000177501
Arg	815364268	T/G	3VmrMLM	8.4943	0.7776	3.99287e-10
Arg	220293741	T/C	3VmrMLM	9.4209	0.9006	4.50018e-11
Arg	1000276312	A/G	3VmrMLM	20.5001	1.0124	2.57433e-22
Arg	711043834	A/G	3VmrMLM	15.066	1.0634	8.12428e-17
Arg	1203650373	A/G	3VmrMLM	9.3662	1.1089	5.11826e-11
Arg	307840841	A/G	3VmrMLM	19.4115	1.1672	3.24148e-21
Arg	1104418152	T/C	3VmrMLM	5.1686	1.2297	1.06808e-06
Arg	1011597302	A/G	3VmrMLM	16.6428	1.2414	2.05135e-18
Arg	1123179992	C/T	3VmrMLM	4.9514	1.3151	1.79663e-06
Arg	626090111	A/G	3VmrMLM	5.9396	1.571	1.69614e-07
Arg	1122412156	A/G	3VmrMLM	8.214	1.6863	7.73611e-10
Arg	528394307	C/T	3VmrMLM	6.3095	1.7017	7.03432e-08
Arg	1105177004	C/T	3VmrMLM	7.2867	1.7033	6.9271e-09
Arg	516070871	T/C	3VmrMLM	6.9979	1.7182	1.37296e-08
Arg	1109982074	A/T	3VmrMLM	20.4606	1.7469	2.82168e-22
Arg	916065720	T/C	3VmrMLM	28.9171	1.7605	8.3267e-31
Arg	816289400	T/C	3VmrMLM	16.8605	1.7826	1.23467e-18
Arg	911540262	T/C	3VmrMLM	7.2246	1.7899	8.02423e-09
Arg	1017905052	C/T	3VmrMLM	10.005	1.8294	1.13931e-11
Arg	1111613500	G/A	3VmrMLM	10.5167	1.8972	3.42401e-12
Arg	1126724054	T/A	3VmrMLM	46.0919	2.0938	4.42886e-48
Arg	606385456	A/C	3VmrMLM	8.1693	2.1358	8.59671e-10
Arg	1127386052	T/C	3VmrMLM	15.5162	2.2334	2.84104e-17
Arg	800953534	A/G	3VmrMLM	19.015	2.2682	8.15905e-21
Arg	1123055344	G/A	3VmrMLM	9.6449	2.4082	2.65656e-11
Arg	426829091	T/C	3VmrMLM	18.943	2.5714	9.64917e-21
Arg	710392599	G/A	3VmrMLM	8.8582	2.5799	1.69324e-10
Arg	611538631	G/A	3VmrMLM	10.5424	2.9148	3.22366e-12
Arg	519758684	A/G	3VmrMLM	16.0253	3.8354	8.6608e-18
Arg	508130390	C/A	3VmrMLM	15.5424	4.3497	2.67201e-17
Arg	608820158	G/T	FarmCPU		0.166407	1.75572e-11
Arg	700890333	A/G	FarmCPU		0.169552	5.09144e-10
Arg	1209658515	G/A	mrMLM	4.8559	0.4294	2.25892e-06
Arg	914101950	T/C	mrMLM	3.3374	0.4442	8.84301e-05
Arg	206541159	C/T	mrMLM	3.8853	0.4738	2.3383e-05
Arg	1127841234	T/C	mrMLM	3.5404	0.579	5.39635e-05
Arg	300482841	T/C	mrMLM	4.4232	0.6062	6.38557e-06
Arg	812555107	G/A	mrMLM	4.0896	0.6353	1.42692e-05
Arg	100694213	C/G	mrMLM	3.5847	0.6738	4.84619e-05
Arg	209207348	C/T	mrMLM	4.5272	0.6813	4.97279e-06
Arg	821109998	C/T	mrMLM	4.0384	0.7903	1.61473e-05
Arg	909810667	G/A	mrMLM	4.6658	0.8315	3.56451e-06
Arg	519652662	A/G	mrMLM	6.4889	0.888	4.59304e-08
Arg	606290536	T/C	mrMLM	5.4214	0.9366	5.83579e-07
Arg	229897985	T/C	mrMLM	3.1277	1.005	0.000147571
Arg	219796153	T/C	mrMLM	3.5888	1.0339	4.79733e-05
Arg	1120676382	T/C	mrMLM	3.0382	1.065	0.000183696
Arg	809148557	A/T	mrMLM	4.1325	1.073	1.28677e-05
Arg	623326382	A/G	mrMLM	4.2826	1.1032	8.95983e-06
Arg	907950531	C/T	mrMLM	3.126	1.1426	0.000148184
Arg	402117177	T/C	mrMLM	6.1355	1.1655	1.0639e-07
Arg	600973723	G/C	mrMLM	6.5317	1.355	4.14954e-08
Arg	326506419	C/T	mrMLM	7.6644	1.3605	2.834e-09
Arg	1105136435	T/A	mrMLM	7.3127	1.4117	6.51328e-09
Arg	1207716974	A/C	mrMLM	9.8693	1.4828	1.56747e-11
Arg	619006890	C/T	mrMLM	5.056	1.5216	1.3983e-06
Arg	332219692	C/A	mrMLM	3.2945	1.533	9.81974e-05
Arg	807651136	T/C	mrMLM	6.3587	1.8163	6.25749e-08
Arg	1108114501	T/C	mrMLM	5.7101	1.8563	2.93022e-07
Arg	107646091	C/A	mrMLM	4.1944	1.9025	1.10815e-05
Arg	1215627474	C/T	mrMLM	8.6985	1.9834	2.46718e-10
Arg	1011708721	C/G	mrMLM	8.4794	2	4.13619e-10
Arg	432815694	G/A	mrMLM	6.345	2.2741	6.46547e-08
Arg	427695168	C/G	mrMLM	7.3925	2.3408	5.39262e-09
Arg	613371776	C/T	mrMLM	4.18	2.3708	1.14736e-05
Arg	328976542	C/T	mrMLM	12.4256	2.5374	3.89673e-14
Arg	1203473916	A/G	mrMLM	5.1882	2.648	1.01906e-06
Arg	616699817	C/T	mrMLM	4.112	2.76	1.35207e-05
Arg	610904021	C/T	mrMLM	7.6966	2.8684	2.62664e-09
Arg	305668710	C/T	mrMLM	7.1767	3.9809	8.98876e-09
Arg	1205018151	G/A	mrMLM	5.9788	4.5614	1.5449e-07
Arg	711019378	T/G	mrMLM	5.8594	4.7224	2.05305e-07
Arg	212282133	T/A	mrMLM	10.9832	5.5852	1.14551e-12
Arg	112665350	A/G	mrMLM	6.8548	7.8318	1.92752e-08
Arg	121398228	A/G	mrMLM	7.5864	9.2824	3.408e-09
Arg	1109982074	A/T	FASTmrMLM	3.0302	0.4771	0.000187327
Arg	209207348	C/T	FASTmrMLM	3.1966	0.5063	0.000124681
Arg	714272241	A/G	FASTmrMLM	3.498	0.7221	5.98274e-05
Arg	1223474530	T/C	FASTmrMLM	3.6331	0.75	4.30824e-05
Arg	1206522152	C/A	FASTmrMLM	3.3227	0.79	9.16643e-05
Arg	1122301618	T/C	FASTmrMLM	4.1702	0.853	1.1749e-05
Arg	816289400	T/C	FASTmrMLM	5.1988	0.8571	9.93574e-07
Arg	1214469490	A/G	FASTmrMLM	4.0591	0.8854	1.53603e-05
Arg	107826261	G/A	FASTmrMLM	4.0004	0.9576	1.77011e-05
Arg	1220310157	C/A	FASTmrMLM	4.1527	0.9588	1.22546e-05
Arg	818176421	T/A	FASTmrMLM	3.2052	0.9738	0.000122096
Arg	1000620045	A/G	FASTmrMLM	4.5816	0.9757	4.36315e-06
Arg	1000960667	T/C	FASTmrMLM	3.7339	1.009	3.37365e-05
Arg	1000276312	A/G	FASTmrMLM	3.9173	1.0265	2.16421e-05
Arg	1126724054	T/A	FASTmrMLM	4.9623	1.0657	1.75025e-06
Arg	219791673	G/C	FASTmrMLM	3.7544	1.0666	3.2107e-05
Arg	1122443762	A/G	FASTmrMLM	3.3449	1.123	8.6836e-05
Arg	1123055344	G/A	FASTmrMLM	5.9949	1.2249	1.48662e-07
Arg	233500728	G/A	FASTmrMLM	4.5388	1.257	4.83615e-06
Arg	916065720	T/C	FASTmrMLM	6.8031	1.562	2.17871e-08
Arg	805606041	A/G	FASTmrMLM	5.2703	1.6484	8.37529e-07
Arg	727505690	G/C	FASTmrMLM	4.2816	2.058	8.98049e-06
Arg	800953534	A/G	FASTmrMLM	7.0494	2.4589	1.21507e-08
Arg	1017905052	C/T	FASTmrMLM	6.6653	2.697	3.02134e-08
Arg	516810861	G/A	FASTmrEMMA	3.5649	0.0001	5.08511e-05
Arg	610494364	A/G	FASTmrEMMA	3.2772	0.0005	0.000102424
Arg	916240016	G/A	FASTmrEMMA	3.6371	0.0005	4.26678e-05
Arg	716494743	A/G	FASTmrEMMA	5.2209	0.0012	9.42323e-07
Arg	1122358024	G/A	FASTmrEMMA	3.2161	0.0031	0.000118905
Arg	815781820	A/C	FASTmrEMMA	3.82	0.1596	2.73842e-05
Arg	204807548	C/A	FASTmrEMMA	6.0613	0.2225	1.2694e-07
Arg	807417388	C/A	FASTmrEMMA	3.3035	0.2301	9.60506e-05
Arg	727133725	T/C	FASTmrEMMA	3.238	0.2452	0.000112694
Arg	807651136	T/C	FASTmrEMMA	4.5687	0.2822	4.49987e-06
Arg	233500728	G/A	FASTmrEMMA	4.2	0.2864	1.09345e-05
Arg	1216927973	A/G	FASTmrEMMA	4.6165	0.3487	4.01236e-06
Arg	904822310	C/T	FASTmrEMMA	3.9543	0.3939	1.97879e-05
Arg	816289400	T/C	FASTmrEMMA	3.2212	0.4005	0.000117436
Arg	907265257	A/G	FASTmrEMMA	4.4436	0.4287	6.07995e-06
Arg	916065720	T/C	FASTmrEMMA	5.0883	0.4408	1.29449e-06
Arg	1123563405	A/G	FASTmrEMMA	3.7074	0.4484	3.59832e-05
Arg	1117222150	A/G	FASTmrEMMA	3.2754	0.4488	0.000102896
Arg	508622670	A/G	FASTmrEMMA	3.0448	0.4524	0.000180759
Arg	1203650373	A/G	FASTmrEMMA	4.0733	0.5026	1.48457e-05
Arg	1000276312	A/G	FASTmrEMMA	5.4728	0.5116	5.16179e-07
Arg	512799164	A/G	FASTmrEMMA	6.5251	0.5162	4.21405e-08
Arg	521474890	C/T	FASTmrEMMA	6.1306	0.5361	1.07647e-07
Arg	808071768	G/C	FASTmrEMMA	4.4166	0.5503	6.48784e-06
Arg	1124045418	A/G	FASTmrEMMA	6.9313	0.5523	1.60768e-08
Arg	716784766	G/A	FASTmrEMMA	3.1183	0.602	0.000151008
Arg	417201002	T/C	FASTmrEMMA	7.5805	0.6205	3.45621e-09
Arg	1010990319	G/A	FASTmrEMMA	3.3326	0.6334	8.94746e-05
Arg	1207716974	A/C	FASTmrEMMA	12.7825	0.6388	1.69005e-14
Arg	715850330	T/C	FASTmrEMMA	3.2843	0.6657	0.00010067
Arg	322118274	A/G	FASTmrEMMA	6.0233	0.7395	1.38963e-07
Arg	216869901	C/T	FASTmrEMMA	8.2995	0.7425	6.32266e-10
Arg	124859815	T/C	FASTmrEMMA	6.3982	0.8414	5.69639e-08
Arg	601269413	A/G	FASTmrEMMA	4.0173	0.8683	1.69942e-05
Arg	1111490451	A/G	FASTmrEMMA	8.3777	0.9273	5.25775e-10
Arg	1104353718	C/G	FASTmrEMMA	4.6926	0.9543	3.34195e-06
Arg	528394307	C/T	FASTmrEMMA	9.1753	0.9952	8.02232e-11
Arg	709812866	C/T	FASTmrEMMA	7.8942	1.0019	1.64665e-09
Arg	1005158849	G/A	FASTmrEMMA	5.2909	1.0073	7.97076e-07
Arg	525181118	T/C	FASTmrEMMA	10.3022	1.1403	5.66631e-12
Arg	809550125	T/G	FASTmrEMMA	6.5279	1.1664	4.18697e-08
Arg	1121396800	C/T	FASTmrEMMA	7.6368	1.1727	3.02552e-09
Arg	1225307027	T/C	FASTmrEMMA	4.2532	1.2485	9.61612e-06
Arg	714355704	C/T	FASTmrEMMA	6.9898	1.4651	1.39959e-08
Arg	1205249702	A/C	FASTmrEMMA	3.8873	1.4849	2.32702e-05
Arg	107646091	C/A	FASTmrEMMA	5.2681	1.5501	8.41977e-07
Arg	1011766291	T/C	FASTmrEMMA	4.925	1.5668	1.91382e-06
Arg	1005540548	C/T	FASTmrEMMA	7.3038	1.6366	6.6512e-09
Arg	722486626	G/A	FASTmrEMMA	8.6636	1.6851	2.67855e-10
Arg	325738693	T/G	FASTmrEMMA	10.1004	1.7459	9.10542e-12
Arg	1011043848	T/C	FASTmrEMMA	13.4915	1.9823	3.2181e-15
Arg	1108114501	T/C	FASTmrEMMA	10.2075	2.9149	7.07946e-12
Arg	419491805	G/T	FASTmrEMMA	3.3036	3.8188	9.60506e-05
Arg	1202500310	G/A	pLARmEB	3.5982	0.3364	4.68921e-05
Arg	1122412156	A/G	pLARmEB	3.5802	0.4969	4.89892e-05
Arg	905706681	C/T	pLARmEB	5.1693	0.5556	1.06635e-06
Arg	913167431	A/G	pLARmEB	3.367	0.5739	8.22811e-05
Arg	816289400	T/C	pLARmEB	4.4065	0.5805	6.64814e-06
Arg	516343106	T/C	pLARmEB	3.1219	0.6504	0.000149658
Arg	219791673	G/C	pLARmEB	3.9531	0.6972	1.98472e-05
Arg	1220310157	C/A	pLARmEB	5.5193	0.8167	4.61955e-07
Arg	324663952	T/C	pLARmEB	3.6967	0.8711	3.69233e-05
Arg	1000827293	T/C	pLARmEB	3.6799	0.9711	3.84592e-05
Arg	1004107283	T/C	pLARmEB	4.0281	1.071	1.65539e-05
Arg	525048745	G/A	pLARmEB	5.5189	1.0836	4.62381e-07
Arg	713141741	T/C	pLARmEB	5.7825	1.1608	2.46604e-07
Arg	626090111	A/G	pLARmEB	4.5735	1.1917	4.44939e-06
Arg	526132500	G/C	pLARmEB	3.6291	1.2681	4.35011e-05
Arg	1209657867	T/C	pLARmEB	7.2529	1.4267	7.50412e-09
Arg	1117002621	T/C	pLARmEB	5.5773	1.5762	4.02254e-07
Arg	915311009	C/T	pLARmEB	7.1451	1.649	9.68724e-09
Arg	1009517107	A/T	pLARmEB	7.843	1.7482	1.85823e-09
Arg	1103156279	A/G	pLARmEB	3.4946	1.8337	6.03115e-05
Arg	605943892	A/G	pLARmEB	8.6145	2.1542	3.00746e-10
Arg	508130390	C/A	pLARmEB	7.1058	2.1747	1.06316e-08
Arg	727264573	C/T	pLARmEB	4.3221	2.2184	8.14517e-06
Arg	519035103	G/A	pLARmEB	8.6447	2.2769	2.80092e-10
Arg	112352703	A/G	pLARmEB	3.1153	2.8963	0.00015209
Arg	1121808753	A/G	pLARmEB	7.1283	3.2783	1.00786e-08
Arg	427657168	C/G	pLARmEB	6.0893	3.4441	1.18768e-07
Arg	610903241	A/G	pLARmEB	7.6488	3.6955	2.94103e-09
Arg	623251268	A/G	pLARmEB	13.5896	4.6942	2.558e-15
Arg	1109704635	A/G	pLARmEB	7.706	6.9717	2.56862e-09
Arg	214000992	T/G	pLARmEB	8.386	6.9857	5.15585e-10
Arg	607116277	A/G	pLARmEB	4.4048	9.1134	6.67575e-06
Arg	112195508	A/G	pKWmEB	3.8982	2.1099	2.26621e-05
Arg	1126724054	T/A	pKWmEB	3.7872	2.5747	2.96483e-05
Arg	817576756	T/C	pKWmEB	4.9954	3.2871	1.61696e-06
Arg	718346636	C/T	pKWmEB	3.2154	3.5388	0.000119097
Arg	1000960667	T/C	pKWmEB	3.102	4.2408	0.000157145
Arg	220293741	T/C	pKWmEB	3.4211	4.6316	7.21274e-05
Arg	515990650	C/T	pKWmEB	3.866	7.7092	2.45019e-05
Arg	916065720	T/C	ISIS EM-BLASSO	3.2986	1.3906	9.72076e-05
Arg	1123731815	C/T	ISIS EM-BLASSO	4.0874	1.5737	1.43483e-05
Arg	718078138	C/T	ISIS EM-BLASSO	4.1927	3.2845	1.11276e-05
Arg	1203473916	A/G	ISIS EM-BLASSO	4.4016	4.1565	6.72667e-06
Trp	714037493	C/T	3VmrMLM	9.3937	0.8609	4.79776e-11
Trp	210729461	C/T	3VmrMLM	5.9925	0.9022	1.49526e-07
Trp	123592545	T/C	3VmrMLM	5.1401	0.9132	1.14355e-06
Trp	801492847	A/G	3VmrMLM	19.7682	0.9231	1.41313e-21
Trp	1219815706	G/A	3VmrMLM	10.541	0.9309	3.2339e-12
Trp	719622907	T/G	3VmrMLM	6.5445	0.9613	4.02527e-08
Trp	707303573	T/C	3VmrMLM	11.8812	1.1013	1.39498e-13
Trp	1115883473	C/T	3VmrMLM	8.7467	1.1137	2.20199e-10
Trp	717742440	A/T	3VmrMLM	9.514	1.1736	3.61493e-11
Trp	1214378277	T/C	3VmrMLM	6.3339	1.2503	6.63864e-08
Trp	218101724	T/C	3VmrMLM	13.1621	1.2564	6.95206e-15
Trp	916065720	T/C	3VmrMLM	21.1853	1.2934	5.22938e-23
Trp	727277499	T/C	3VmrMLM	8.0393	1.3635	1.16871e-09
Trp	1210986034	A/T	3VmrMLM	16.7134	1.3783	1.73995e-18
Trp	402952910	T/C	3VmrMLM	4.9373	1.3813	1.85826e-06
Trp	1214211779	G/A	3VmrMLM	6.0624	1.3933	1.26623e-07
Trp	1103441584	T/C	3VmrMLM	8.1692	1.4337	8.59906e-10
Trp	224189963	C/T	3VmrMLM	15.4932	1.4386	2.99717e-17
Trp	516800131	A/C	3VmrMLM	18.5146	1.4578	2.61631e-20
Trp	804874213	A/G	3VmrMLM	6.8226	1.5541	2.08042e-08
Trp	1214442462	G/A	3VmrMLM	5.8648	1.6267	2.02679e-07
Trp	203534250	A/G	3VmrMLM	23.7921	1.7588	1.22179e-25
Trp	403625489	A/G	3VmrMLM	7.3945	1.7975	5.36688e-09
Trp	1121127736	A/G	3VmrMLM	16.7545	1.8279	1.58097e-18
Trp	1206187141	A/C	3VmrMLM	12.356	1.9309	4.58657e-14
Trp	1127980597	T/C	3VmrMLM	7.585	2.0611	3.4199e-09
Trp	1011596338	A/G	3VmrMLM	13.7732	2.175	1.66543e-15
Trp	1118539797	C/G	3VmrMLM	13.1771	2.2312	6.71256e-15
Trp	623933743	C/A	3VmrMLM	24.2148	2.6776	4.57697e-26
Trp	716269949	A/G	3VmrMLM	10.8672	2.9269	1.50366e-12
Trp	614981180	A/G	3VmrMLM	15.9677	3.1007	9.90557e-18
Trp	816203273	A/G	3VmrMLM	12.6733	3.6748	2.1821e-14
Trp	803244157	T/C	3VmrMLM	34.4593	3.8179	2.19261e-36
Trp	1009582456	A/G	3VmrMLM	13.2626	3.9682	5.49636e-15
Trp	805471123	A/C	3VmrMLM	16.4119	4.3474	3.51444e-18
Trp	805642680	C/A	FarmCPU		0.501116	5.27931e-09
Trp	1000960108	G/A	FarmCPU		0.236568	2.8041e-12
Trp	1127949220	T/C	mrMLM	4.465	1.2139	5.77564e-06
Trp	319067962	A/G	mrMLM	3.0197	1.3052	0.000192221
Trp	709691286	T/C	mrMLM	3.1507	1.3828	0.000139508
Trp	421328910	G/A	mrMLM	3.3259	1.3834	9.09494e-05
Trp	202873008	T/C	mrMLM	3.9774	1.4374	1.87154e-05
Trp	431375639	A/G	mrMLM	6.6142	1.4684	3.41114e-08
Trp	1124815000	T/G	mrMLM	3.0023	1.7192	0.000200586
Trp	605154216	T/C	mrMLM	5.2078	1.8665	9.72523e-07
Trp	113599794	A/G	mrMLM	4.0242	1.9932	1.67109e-05
Trp	206961476	A/C	mrMLM	5.1409	2.0383	1.1413e-06
Trp	407038806	T/C	mrMLM	7.0553	2.7104	1.1984e-08
Trp	211313920	T/C	mrMLM	5.5092	2.7377	4.7326e-07
Trp	516800131	A/C	mrMLM	7.7259	2.7598	2.45076e-09
Trp	141118548	C/T	mrMLM	5.5882	2.9204	3.91922e-07
Trp	1012174858	G/A	mrMLM	8.5501	2.978	3.50106e-10
Trp	107646091	C/A	mrMLM	6.3178	3.0338	6.89763e-08
Trp	716081025	A/C	mrMLM	3.8235	3.4136	2.71581e-05
Trp	307625862	A/G	mrMLM	6.176	3.7368	9.66273e-08
Trp	619684338	A/G	mrMLM	5.2527	4.4424	8.73373e-07
Trp	817353239	C/G	mrMLM	4.33	5.752	7.99282e-06
Trp	805618520	T/C	mrMLM	21.4893	17.6095	2.5787e-23
Trp	1022334499	T/C	FASTmrMLM	3.5494	3.3922e-08	5.27959e-05
Trp	412348875	A/G	FASTmrMLM	3.4176	0.1561	7.27445e-05
Trp	1214353754	C/T	FASTmrMLM	3.1793	0.2833	0.000130077
Trp	1124815000	T/G	FASTmrMLM	3.4328	0.2879	7.00971e-05
Trp	404130116	T/G	FASTmrMLM	3.2063	0.2902	0.000121787
Trp	707295540	C/T	FASTmrMLM	3.2083	0.3638	0.000121171
Trp	517423777	C/T	FASTmrMLM	3.1557	0.3719	0.000137784
Trp	421328910	G/A	FASTmrMLM	4.5068	0.3782	5.22276e-06
Trp	407741869	A/G	FASTmrMLM	4.1967	0.4508	1.10205e-05
Trp	1209701190	T/C	FASTmrMLM	3.8322	0.4856	2.65889e-05
Trp	1112454668	A/G	FASTmrMLM	3.8044	0.4901	2.84381e-05
Trp	402952910	T/C	FASTmrMLM	3.7173	0.5032	3.51237e-05
Trp	434755453	T/C	FASTmrMLM	4.9487	0.5905	1.80801e-06
Trp	203534250	A/G	FASTmrMLM	3.7863	0.6281	2.97167e-05
Trp	718491125	T/G	FASTmrMLM	5.2615	0.6387	8.55264e-07
Trp	714037493	C/T	FASTmrMLM	4.5804	0.6767	4.37623e-06
Trp	1108899363	G/A	FASTmrMLM	3.448	0.7458	6.75616e-05
Trp	211131203	C/T	FASTmrMLM	4.7427	0.7573	2.96347e-06
Trp	809441155	A/T	FASTmrMLM	5.3567	0.7762	6.8124e-07
Trp	623933743	C/A	FASTmrMLM	4.6937	0.8675	3.3335e-06
Trp	603504619	G/A	FASTmrMLM	5.822	0.8862	2.2444e-07
Trp	1127980597	T/C	FASTmrMLM	4.0496	0.8871	1.57181e-05
Trp	1103441584	T/C	FASTmrMLM	5.1069	0.9404	1.23794e-06
Trp	916065720	T/C	FASTmrMLM	6.3985	1.1507	5.69377e-08
Trp	1106832920	G/C	FASTmrMLM	5.6121	1.1644	3.70169e-07
Trp	1214647639	T/G	FASTmrMLM	4.657	1.2392	3.63999e-06
Trp	1210986034	A/T	FASTmrMLM	6.2418	1.3037	8.26228e-08
Trp	707303573	T/C	FASTmrMLM	5.517	1.3435	4.64515e-07
Trp	719622907	T/G	FASTmrMLM	6.4106	1.3863	5.53223e-08
Trp	1220307844	T/A	FASTmrMLM	6.7974	1.4066	2.20851e-08
Trp	307625862	A/G	FASTmrMLM	8.0208	1.4811	1.22096e-09
Trp	517170990	T/C	FASTmrMLM	5.7304	1.585	2.7919e-07
Trp	816203273	A/G	FASTmrMLM	4.3914	1.7292	6.89446e-06
Trp	226733182	C/T	FASTmrMLM	6.163	1.796	9.96552e-08
Trp	516813431	G/T	FASTmrMLM	7.136	1.8232	9.89692e-09
Trp	516352099	G/T	FASTmrMLM	9.9495	1.8389	1.29808e-11
Trp	1115883473	C/T	FASTmrMLM	7.3435	1.8682	6.0548e-09
Trp	1121127736	A/G	FASTmrMLM	9.4951	1.931	3.7792e-11
Trp	507387703	G/A	FASTmrMLM	7.5114	2.0859	4.07005e-09
Trp	1206187141	A/C	FASTmrMLM	7.386	2.3933	5.47646e-09
Trp	804874213	A/G	FASTmrMLM	8.9649	2.6837	1.31674e-10
Trp	516813431	G/T	FASTmrEMMA	5.6578	1.1475e-07	3.31971e-07
Trp	226730306	C/A	FASTmrEMMA	4.9611	3.5347e-06	1.7555e-06
Trp	614981180	A/G	FASTmrEMMA	3.1537	0.0002	0.000138484
Trp	403168725	T/C	FASTmrEMMA	4.7949	0.0004	2.61457e-06
Trp	124418945	C/G	FASTmrEMMA	3.7083	0.016	3.59005e-05
Trp	1120618003	A/G	FASTmrEMMA	6.1943	0.0433	9.25124e-08
Trp	804993719	T/C	FASTmrEMMA	3.325	0.0458	9.11591e-05
Trp	416642935	A/G	FASTmrEMMA	4.6114	0.0934	4.06163e-06
Trp	1103457326	G/A	FASTmrEMMA	4.2178	0.1334	1.04737e-05
Trp	1127957505	A/C	FASTmrEMMA	3.3213	0.1595	9.19814e-05
Trp	307625862	A/G	FASTmrEMMA	4.5039	0.1892	5.25896e-06
Trp	130288766	G/C	FASTmrEMMA	3.1418	0.1933	0.000142561
Trp	1200060631	T/C	FASTmrEMMA	4.5482	0.3188	4.72716e-06
Trp	1125238812	A/G	FASTmrEMMA	5.7052	0.3409	2.96483e-07
Trp	811145229	C/T	FASTmrEMMA	4.2418	0.3718	9.88553e-06
Trp	615027656	C/T	FASTmrEMMA	4.0794	0.4245	1.46285e-05
Trp	615255861	A/G	FASTmrEMMA	5.2019	0.4274	9.86279e-07
Trp	1209875492	A/G	FASTmrEMMA	5.7208	0.4429	2.85693e-07
Trp	224187114	C/T	FASTmrEMMA	5.0971	0.4546	1.26736e-06
Trp	1115883473	C/T	FASTmrEMMA	5.7988	0.5938	2.37192e-07
Trp	817402068	G/A	FASTmrEMMA	9.2271	0.6104	7.10232e-11
Trp	105392860	A/C	FASTmrEMMA	7.2882	0.6106	6.90081e-09
Trp	403663891	A/G	FASTmrEMMA	5.6179	0.6654	3.6509e-07
Trp	120889572	T/C	FASTmrEMMA	5.0253	0.6775	1.50487e-06
Trp	1106182163	A/G	FASTmrEMMA	5.0435	0.712	1.44079e-06
Trp	1106070629	G/A	FASTmrEMMA	3.9059	0.7144	2.22485e-05
Trp	1106516532	G/A	FASTmrEMMA	4.5182	0.759	5.08159e-06
Trp	708018681	C/T	FASTmrEMMA	5.7847	0.7738	2.45301e-07
Trp	1213168739	C/T	FASTmrEMMA	4.7091	0.8395	3.21218e-06
Trp	134536798	C/T	FASTmrEMMA	4.3866	0.9043	6.97429e-06
Trp	211062213	G/C	FASTmrEMMA	10.2454	0.9172	6.4759e-12
Trp	123592545	T/C	FASTmrEMMA	12.8152	0.9387	1.56531e-14
Trp	423480014	A/G	FASTmrEMMA	4.862	0.9494	2.22587e-06
Trp	1014529319	T/C	FASTmrEMMA	3.5841	0.9702	4.85289e-05
Trp	516352099	G/T	FASTmrEMMA	8.218	1.0057	7.66479e-10
Trp	402865935	G/A	FASTmrEMMA	4.0057	1.0083	1.74783e-05
Trp	805455773	A/G	FASTmrEMMA	3.1582	1.0414	0.000136962
Trp	412348875	A/G	FASTmrEMMA	5.7296	1.0986	2.79769e-07
Trp	916065720	T/C	FASTmrEMMA	11.3569	1.1965	4.7676e-13
Trp	1124175075	G/A	FASTmrEMMA	3.8624	1.2118	2.47116e-05
Trp	1107097726	A/G	FASTmrEMMA	4.9768	1.2538	1.69044e-06
Trp	717742440	A/T	FASTmrEMMA	4.3541	1.2797	7.5405e-06
Trp	1012174858	G/A	FASTmrEMMA	12.1531	1.3956	7.37734e-14
Trp	922310411	G/A	FASTmrEMMA	4.567	1.4549	4.51856e-06
Trp	719622907	T/G	FASTmrEMMA	6.6488	1.7052	3.14196e-08
Trp	434755453	T/C	FASTmrEMMA	6.4037	1.8477	5.62341e-08
Trp	1210986034	A/T	FASTmrEMMA	12.2071	1.8742	6.4998e-14
Trp	1121127736	A/G	FASTmrEMMA	7.0285	1.9747	1.27673e-08
Trp	412194665	C/T	FASTmrEMMA	7.4266	2.0381	4.97508e-09
Trp	217885689	C/T	FASTmrEMMA	7.5052	2.2562	4.13048e-09
Trp	421326902	G/T	FASTmrEMMA	8.7035	2.5421	2.43837e-10
Trp	316308103	A/G	FASTmrEMMA	12.532	3.3959	3.03809e-14
Trp	318165782	A/G	FASTmrEMMA	6.3315	4.5531	6.67729e-08
Trp	816193192	A/G	FASTmrEMMA	7.7019	6.8405	2.59358e-09
Trp	804874213	A/G	pLARmEB	3.391	0.1523	7.76068e-05
Trp	421328910	G/A	pLARmEB	4.4472	0.202	6.02837e-06
Trp	916065720	T/C	pLARmEB	3.068	0.2133	0.000170765
Trp	825912265	T/C	pLARmEB	3.2215	0.2422	0.000117328
Trp	623933743	C/A	pLARmEB	3.4209	0.2679	7.21606e-05
Trp	203534250	A/G	pLARmEB	3.4347	0.2792	6.9775e-05
Trp	434755453	T/C	pLARmEB	5.7786	0.3156	2.48886e-07
Trp	1213321466	G/A	pLARmEB	3.08	0.3377	0.000165844
Trp	621120517	A/T	pLARmEB	3.3719	0.3423	8.13018e-05
Trp	113599794	A/G	pLARmEB	3.4021	0.3651	7.5544e-05
Trp	1121127736	A/G	pLARmEB	4.9467	0.3656	1.81677e-06
Trp	629178367	A/G	pLARmEB	4.0882	0.3658	1.43186e-05
Trp	403775793	A/T	pLARmEB	5.2612	0.3669	8.55855e-07
Trp	1012174858	G/A	pLARmEB	5.3098	0.3688	7.61904e-07
Trp	1121411812	T/C	pLARmEB	4.4477	0.3725	6.02005e-06
Trp	809209535	A/G	pLARmEB	3.2556	0.3989	0.000107969
Trp	412222206	C/T	pLARmEB	4.8227	0.449	2.44568e-06
Trp	1220307844	T/A	pLARmEB	5.5191	0.4915	4.62168e-07
Trp	707530011	A/G	pLARmEB	3.6617	0.4936	4.01976e-05
Trp	403575309	G/A	pLARmEB	6.3695	0.5062	6.09958e-08
Trp	1124815000	T/G	pLARmEB	4.0821	0.5382	1.45312e-05
Trp	600858322	G/A	pLARmEB	3.5326	0.5383	5.49921e-05
Trp	618883437	G/T	pLARmEB	4.7978	0.5401	2.59657e-06
Trp	614981180	A/G	pLARmEB	5.7297	0.5833	2.7964e-07
Trp	1215441379	C/G	pLARmEB	4.9289	0.6306	1.89627e-06
Trp	719622907	T/G	pLARmEB	6.6442	0.6512	3.17687e-08
Trp	1103441584	T/C	pLARmEB	6.0714	0.6875	1.23937e-07
Trp	1126158176	A/G	pLARmEB	6.6148	0.7313	3.40643e-08
Trp	104563386	A/C	pLARmEB	5.9282	0.8285	1.74261e-07
Trp	516352099	G/T	pLARmEB	9.3983	0.8751	4.7457e-11
Trp	211313920	T/C	pLARmEB	10.0252	1.4564	1.08643e-11
Trp	517170990	T/C	pLARmEB	9.8033	1.5	1.83063e-11
Trp	614981180	A/G	pKWmEB	3.0064	1.4671	0.000198564
Trp	1121127736	A/G	pKWmEB	3.6936	1.5943	3.72049e-05
Trp	403575309	G/A	pKWmEB	4.5452	1.7261	4.76212e-06
Trp	719622907	T/G	pKWmEB	4.2844	1.8877	8.92072e-06
Trp	412348875	A/G	pKWmEB	3.2334	1.9143	0.000113972
Trp	702695801	G/A	pKWmEB	5.475	1.9816	5.1357e-07
Trp	226046491	G/A	pKWmEB	5.7481	2.1711	2.6767e-07
Trp	1121074575	T/C	pKWmEB	3.7907	2.1759	2.94036e-05
Trp	1009582456	A/G	pKWmEB	6.1191	2.2215	1.10637e-07
Trp	623933743	C/A	pKWmEB	4.9276	2.2714	1.90195e-06
Trp	916065720	T/C	pKWmEB	4.4281	2.4207	6.31103e-06
Trp	224189963	C/T	pKWmEB	4.1349	2.4502	1.27938e-05
Trp	1011596338	A/G	pKWmEB	4.9925	2.4786	1.62817e-06
Trp	1214647639	T/G	pKWmEB	7.1935	2.4891	8.63774e-09
Trp	1106260809	A/G	pKWmEB	3.3707	2.5001	8.15455e-05
Trp	1108899363	G/A	pKWmEB	3.0825	2.806	0.000164816
Trp	210729461	C/T	pKWmEB	4.2407	2.9115	9.9106e-06
Trp	1200752598	T/C	pKWmEB	4.3215	3.0497	8.15831e-06
Trp	809209535	A/G	pKWmEB	3.7285	3.1344	3.41822e-05
Trp	516810861	G/A	pKWmEB	8.9304	3.736	1.42824e-10
Trp	707530011	A/G	pKWmEB	6.7321	4.9743	2.5787e-08
Trp	1108899363	G/A	ISIS EM-BLASSO	3.0456	1.1763	0.000180385
Trp	224189963	C/T	ISIS EM-BLASSO	4.0123	1.7371	1.71989e-05
Trp	803244469	G/A	ISIS EM-BLASSO	3.5263	2.0519	5.5847e-05
Trp	1121074575	T/C	ISIS EM-BLASSO	4.5311	2.5132	4.92606e-06
Trp	804874213	A/G	ISIS EM-BLASSO	4.889	2.7752	2.08641e-06
Trp	707303573	T/C	ISIS EM-BLASSO	4.3853	3.4692	6.99681e-06
Trp	1214353754	C/T	ISIS EM-BLASSO	6.5191	3.6454	4.27464e-08
Trp	619805830	C/T	ISIS EM-BLASSO	8.2255	5.6837	7.53009e-10

## Sheet: Supplementary Table  2
Supplementary Table 2 | Stable QTLs identified from five FAA content datasets.
Trait	Method (1, 2, 3, 4, 5, 6, 7, 8, 9)a	QTL	Chromosome	Marker position (bp)	SNP	LOD score	R2(%)b
Val	1, 3, 4, 6, 7, 8	QTL_01_10944343	1	10944343	A/G	19.25, 8.28, 9.46, 4.69, 4.09, 9.76	3.82, 1.33, 5.22, 1.59, 3.87, 3.69
Val	1, 8	QTL_02_16376081	2	16376081	A/T	5.12, 6.05	1.31, 1.33
Val	1, 6	QTL_02_23416703	2	23416703	G/A	15.37, 9.06	3.58, 6.27
Val	1, 3, 6, 8	QTL_02_24287444	2	24287444	A/C	6.98, 10.04, 8.20, 8.36	1.30, 1.20, 2.15, 1.61
Val	1, 4, 8, 7	QTL_04_00762059	4	762059	G/T	15.01, 4.48, 4.36, 5.48	3.35, 0.85, 2.15, 2.20
Val	1, 6, 3	QTL_04_03651481	4	3651481	T/G	8.87, 3.51, 4.93	1.84, 1.65, 0.66
Val	1, 8	QTL_05_19754561	5	19754561	C/A	10.23, 3.18	2.37, 0.80
Val	1, 8	QTL_06_18538935	6	18538935	T/C	9.01, 5.65	2.13, 1.90
Val	1, 3, 4, 6, 8	QTL_09_00526550	9	526550	T/C	7.70, 4.05, 3.75, 6.28, 5.22	1.89, 0.32, 1.52, 2.29, 1.61
Val	1, 4	QTL_09_09185340	9	9185340	A/G	8.86, 3.16	1.95, 1.22
Val	1, 6, 4	QTL_09_14864565	9	14864565	G/C	23.42, 4.02, 7.40	1.58, 1.11, 1.28
Val	1, 4, 7	QTL_09_18724630	9	18724630	C/T	31.84, 4.88, 3.34	2.28, 1.08, 1.23
Val	1, 3, 4	QTL_10_09752934	10	9752934	A/T	23.21, 6.23, 3.14	3.58, 0.55, 0.54
Val	1, 4	QTL_11_00696362	11	696362	C/T	19.51, 3.42	1.35, 0.30
Val	1, 4	QTL_11_16029050	11	16029050	T/C	10.29, 3.78	1.94, 0.45
Leu	2, 6, 8	QTL_01_07089989	1	7089989	T/G	7.35, 5.40	0.25, 2.77, 1.29
Leu	1, 2, 3, 4, 6, 7, 8	QTL_01_10944343	1	10944343	A/G	30.74, 4.48, 6.84, 4.46, 3.38, 7.03	6.95, 0.26, 1.87, 3.63, 1.94, 10.46, 3.55
Leu	1, 6	QTL_01_23419417	1	23419417	C/T	11.08, 3.23	0.83, 1.22
Leu	1, 3, 4, 7, 8	QTL_01_34820524	1	34820524	C/T	10.99, 5.72, 7.39, 4.68, 8.38	1.41, 1.47, 1.38, 2.32, 1.37
Leu	1, 3	QTL_02_24189963	2	24189963	C/T	11.05, 4.91	1.04, 0.55
Leu	1, 4	QTL_02_25758513	2	25758513	T/C	12.98, 3.30	1.30, 0.00
Leu	1, 5	QTL_02_33500728	2	33500728	G/A	30.61, 3.79	2.37, 2.01
Leu	1, 2, 4, 5, 6, 8	QTL_04_01468909	4	1468909	C/T	13.59, 6.65, 10.65, 10.50, 7.42	3.74, 0.17, 3.67, 6.89, 3.51, 2.47
Leu	1, 6, 8	QTL_04_08365015	4	8365015	C/T	10.27, 4.16, 4.18	1.42, 1.38, 0.75
Leu	1, 4	QTL_04_10197947	4	10197947	G/A	7.37, 3.87	0.95, 1.14
Leu	1, 3	QTL_05_23533644	5	23533644	C/A	11.02, 3.15	3.54, 1.17
Leu	1, 4	QTL_09_00239306	9	239306	T/C	7.57, 5.20	0.98, 0.55
Leu	1, 6	QTL_10_05473583	10	5473583	A/G	8.03, 5.66	1.15, 1.96
Leu	1, 4, 7	QTL_10_05632537	10	5632537	A/G	10.32, 5.11, 4.98	0.81, 1.25, 1.99
Leu	1, 5, 7, 8	QTL_12_08631432	12	8631432	T/C	11.85, 4.39, 4.81, 5.52	0.85, 2.30, 2.12, 1.55
Leu	1, 5, 8	QTL_12_14378056	12	14378056	G/A	15.55, 4.23, 3.09	4.25, 1.97, 0.69
Ile	2, 6, 8	QTL_01_07646091	1	7646091	C/A	5.83, 5.27	0.47, 2.91, 3.98
Ile	1, 2, 3, 4, 6, 7, 8	QTL_01_10944343	1	10944343	A/G	21.71, 5.72, 5.72, 3.39, 9.10, 6.94	4.50, 0.30, 3.42, 4.43, 1.62, 6.76, 2.62
Ile	1, 4	QTL_01_23419417	1	23419417	C/T	17.86, 3.15	1.33, 0.59
Ile	1, 8	QTL_02_23416746	2	23416746	C/T	11.07, 7.27	2.80, 1.63
Ile	1, 2, 3, 4	QTL_02_24189963	2	24189963	C/T	10.02, 5.37, 3.24	0.91, 0.16, 0.73, 0.37
Ile	1, 4, 7, 8	QTL_04_12895359	4	12895359	A/G	23.16, 6.50, 4.89, 4.56	1.81, 1.30, 2.35, 0.45
Ile	1, 4	QTL_04_18136896	4	18136896	T/G	8.79, 3.06	0.93, 0.57
Ile	2, 6	QTL_04_34516031	4	34516031	C/A	6.53	0.50, 3.55
Ile	1, 4, 8	QTL_04_34755453	4	34755453	T/C	25.80, 4.97, 4.02	2.20, 1.18, 0.55
Ile	1, 3, 4	QTL_05_19754561	5	19754561	C/A	13.44, 4.15, 6.16	3.26, 0.89, 1.71
Ile	1, 4, 6, 8	QTL_06_21015140	6	21015140	T/C	32.13, 5.44, 4.28, 5.47	2.33, 1.51, 1.03, 1.77
Ile	1, 8	QTL_07_08680072	7	8680072	C/T	9.65, 3.24	2.67, 1.01
Ile	2, 5	QTL_08_15978346	8	15978346	T/C	3.0522	0.18, 3.67
Ile	2, 3	QTL_10_08138230	10	8138230	A/G	4.8906	0.16, 0.34
Ile	1, 3, 7	QTL_10_08684777	10	8684777	G/A	15.43, 3.16, 4.09	1.51, 1.29, 1.86
Ile	1, 3, 6	QTL_10_17905052	10	17905052	C/T	11.38, 9.13, 4.72	2.20, 1.39, 1.24
Ile	1, 4, 7	QTL_11_21411812	11	21411812	T/C	3.04, 4.10, 5.38	0.86, 1.30, 2.35
Ile	1, 8	QTL_11_22556199	11	22556199	T/G	29.85, 4.01	1.46, 0.47
Ile	1, 6	QTL_11_27910501	11	27910501	G/A	7.65, 6.22	2.23, 1.05
Ile	1, 3	QTL_12_07716974	12	7716974	A/C	13.52, 3.60	1.05, 0.02
Arg	1, 7	QTL_02_20293741	2	20293741	T/C	9.42, 3.42	0.90, 4.63
Arg	1, 8	QTL_05_08130390	5	8130390	C/A	15.54, 7.11	4.35, 2.17
Arg	1, 3	QTL_05_28394307	5	28394307	C/T	6.31, 9.18	1.70, 1.00
Arg	1, 8	QTL_06_26090111	6	26090111	A/G	5.94, 4.57	1.57, 1.19
Arg	1, 4	QTL_08_00953534	8	953534	A/G	19.02, 7.05	2.27, 2.46
Arg	1, 4, 3, 8	QTL_08_16289400	8	16289400	T/C	16.86, 5.20, 3.22, 4.41	1.78, 0.86, 0.40, 0.58
Arg	1, 3, 4, 5	QTL_09_16065720	9	16065720	T/C	28.92, 5.09, 6.80, 3.30	1.76, 0.44, 1.56, 1.39
Arg	1, 3, 4	QTL_10_00276312	10	276312	A/G	20.50, 5.47, 3.92	1.01, 0.51, 1.03
Arg	1, 4	QTL_10_17905052	10	17905052	C/T	10.01, 6.67	1.83, 2.70
Arg	1, 4	QTL_11_09982074	11	9982074	A/T	20.46, 3.03	1.75, 0.48
Arg	1, 8	QTL_11_22412156	11	22412156	A/G	8.21, 3.58	1.69, 0.50
Arg	1, 4	QTL_11_23055344	11	23055344	G/A	9.64, 5.99	2.41, 1.22
Arg	1, 4, 7	QTL_11_26724054	11	26724054	T/A	46.09, 4.96, 3.79	2.09, 1.07, 2.57
Arg	1, 3	QTL_12_03650373	12	3650373	A/G	9.37, 4.07	1.11, 0.50
Trp	1, 3	QTL_01_23592545	1	23592545	T/C	5.14, 12.82	0.91, 0.94
Trp	1, 4, 8	QTL_02_03534250	2	3534250	A/G	23.79, 3.79, 3.43	1.76, 0.63, 0.28
Trp	1, 7	QTL_02_10729461	2	10729461	C/T	5.99, 4.24	0.90, 2.91
Trp	1, 5, 7	QTL_02_24189963	2	24189963	C/T	15.49, 4.01, 4.13	1.44, 1.74, 2.45
Trp	1, 4	QTL_04_02952910	4	2952910	T/C	4.94, 3.72	1.38, 0.50
Trp	1, 6	QTL_05_16800131	5	16800131	A/C	18.51, 7.73	1.46, 2.76
Trp	1, 3, 7, 8	QTL_06_14981180	6	14981180	A/G	15.97, 3.15, 3.01, 5.73	3.10, 0.00, 1.47, 0.58
Trp	1, 4, 7, 8	QTL_06_23933743	6	23933743	C/A	24.21, 4.69, 4.93, 3.42	2.68, 0.87, 2.27, 0.27
Trp	1, 4, 5	QTL_07_07303573	7	7303573	T/C	11.88, 5.52, 4.39	1.10, 1.34, 3.47
Trp	1, 4	QTL_07_14037493	7	14037493	C/T	9.39, 4.58	0.86, 0.68
Trp	1, 3	QTL_07_17742440	7	17742440	A/T	9.51, 4.35	1.17, 1.28
Trp	1, 3, 4, 7, 8	QTL_07_19622907	7	19622907	T/G	6.54, 6.65, 6.41, 4.28, 6.64	0.96, 1.71, 1.39, 1.89, 0.65
Trp	1, 4, 5, 8	QTL_08_04874213	8	4874213	A/G	6.82, 8.96, 4.89, 3.39	1.55, 2.68, 2.78, 0.15
Trp	1, 4	QTL_08_16203273	8	16203273	A/G	12.67, 4.39	3.67, 1.73
Trp	1, 3, 4, 7, 8	QTL_09_16065720	9	16065720	T/C	21.19, 11.36, 6.40, 4.43, 3.07	1.29, 1.20, 1.15, 2.42, 0.21
Trp	1, 7	QTL_10_09582456	10	9582456	A/G	13.26, 6.12	3.97, 2.22
Trp	1, 7	QTL_10_11596338	10	11596338	A/G	13.77, 4.99	2.18, 2.48
Trp	1, 4, 8	QTL_11_03441584	11	3441584	T/C	8.17, 5.11, 6.07	1.43, 0.94, 0.69
Trp	1, 3, 4	QTL_11_15883473	11	15883473	C/T	8.75, 5.80, 7.34	1.11, 0.59, 1.87
Trp	1, 3, 4, 7, 8	QTL_11_21127736	11	21127736	A/G	16.75, 7.03, 9.50, 3.69, 4.95	1.83, 1.97, 1.93, 1.59, 0.37
Trp	1, 4	QTL_11_27980597	11	27980597	T/C	7.59, 4.05	2.06, 0.89
Trp	1, 4	QTL_12_06187141	12	6187141	A/C	12.36, 7.39	1.93, 2.39
Trp	1, 3, 4	QTL_12_10986034	12	10986034	A/T	16.71, 12.21, 6.24	1.38, 1.87, 1.30
aMethod numbers correspond to (1) 3VmrMLM, (2) FarmCPU, (3) FASTmrEMMA, (4) FASTmrMLM, (5) ISIS EM-BLASSO, (6) mrMLM, (7) pKWmEB, (8) pLARmEB and (9) GMMEA.
bR2 (%), phenotypic variation of traits explained by each QTN.

## Sheet: Supplementary Table 3
Supplementary Table 3 | Candidate genes of stable QTLs.
Trait	QTL NO.	QTL	Chromosome	Distance (kb)	MSU locus	Functional annotation
Val	1	QTL_01_10944343	1	-113	LOC_Os01g19170	polygalacturonase, putative, expressed
Val	1	QTL_01_10944343	1	-107	LOC_Os01g19180	hypothetical protein
Val	1	QTL_01_10944343	1	-85	LOC_Os01g19190	retrotransposon protein, putative, unclassified
Val	1	QTL_01_10944343	1	-82	LOC_Os01g19200	retrotransposon protein, putative, unclassified
Val	1	QTL_01_10944343	1	-78	LOC_Os01g19210	transposon protein, putative, unclassified
Val	1	QTL_01_10944343	1	-71	LOC_Os01g19220	beta-D-xylosidase, putative, expressed
Val	1	QTL_01_10944343	1	-69	LOC_Os01g19230	conserved hypothetical protein
Val	1	QTL_01_10944343	1	-63	LOC_Os01g19240	integral membrane protein DUF6 containing protein
Val	1	QTL_01_10944343	1	-59	LOC_Os01g19250	hypothetical protein
Val	1	QTL_01_10944343	1	-51	LOC_Os01g19260	ATPase, putative, expressed
Val	1	QTL_01_10944343	1	-47	LOC_Os01g19270	expressed protein
Val	1	QTL_01_10944343	1	-44	LOC_Os01g19280	expressed protein
Val	1	QTL_01_10944343	1	-30	LOC_Os01g19290	integral membrane protein DUF6 containing protein, expressed
Val	1	QTL_01_10944343	1	-22	LOC_Os01g19300	retrotransposon protein, putative, unclassified
Val	1	QTL_01_10944343	1	-16	LOC_Os01g19310	retrotransposon protein, putative, unclassified
Val	1	QTL_01_10944343	1	-12	LOC_Os01g19320	hypothetical protein
Val	1	QTL_01_10944343	1	-9	LOC_Os01g19330	MYB family transcription factor, putative, expressed
Val	1	QTL_01_10944343	1	5	LOC_Os01g19350	hypothetical protein
Val	1	QTL_01_10944343	1	7	LOC_Os01g19360	retrotransposon protein, putative, Ty1-copia subclass
Val	1	QTL_01_10944343	1	15	LOC_Os01g19370	retrotransposon protein, putative, unclassified
Val	1	QTL_01_10944343	1	19	LOC_Os01g19380	pentatricopeptide, putative
Val	1	QTL_01_10944343	1	23	LOC_Os01g19390	glycerol-3-phosphate acyltransferase, putative
Val	1	QTL_01_10944343	1	31	LOC_Os01g19400	expressed protein
Val	1	QTL_01_10944343	1	35	LOC_Os01g19410	expressed protein
Val	1	QTL_01_10944343	1	40	LOC_Os01g19420	transposon protein, putative, unclassified, expressed
Val	1	QTL_01_10944343	1	45	LOC_Os01g19430	3-5 exonuclease domain-containing protein, putative, expressed
Val	1	QTL_01_10944343	1	52	LOC_Os01g19440	pectinesterase, putative
Val	1	QTL_01_10944343	1	53	LOC_Os01g19450	ATP-citrate synthase subunit 1, putative, expressed
Val	1	QTL_01_10944343	1	68	LOC_Os01g19460	retrotransposon protein, putative, unclassified
Val	1	QTL_01_10944343	1	80	LOC_Os01g19470	nodal modulator 1 precursor, putative, expressed
Val	1	QTL_01_10944343	1	113	LOC_Os01g19480	kelch motif family protein, putative, expressed
Val	2	QTL_02_16376081	2	-113	LOC_Os02g27490	bile acid sodium symporter family protein, putative, expressed
Val	2	QTL_02_16376081	2	-109	LOC_Os02g27500	Leucine Rich Repeat family protein, expressed
Val	2	QTL_02_16376081	2	-95	LOC_Os02g27510	transposon protein, putative, unclassified
Val	2	QTL_02_16376081	2	-86	LOC_Os02g27520	transposon protein, putative, unclassified
Val	2	QTL_02_16376081	2	-81	LOC_Os02g27530	retrotransposon protein, putative, unclassified
Val	2	QTL_02_16376081	2	-66	LOC_Os02g27540	NB-ARC domain containing protein
Val	2	QTL_02_16376081	2	-61	LOC_Os02g27550	hypothetical protein
Val	2	QTL_02_16376081	2	-59	LOC_Os02g27560	hypothetical protein
Val	2	QTL_02_16376081	2	-52	LOC_Os02g27570	retrotransposon protein, putative, unclassified
Val	2	QTL_02_16376081	2	-46	LOC_Os02g27580	hypothetical protein
Val	2	QTL_02_16376081	2	-42	LOC_Os02g27590	hypothetical protein
Val	2	QTL_02_16376081	2	-36	LOC_Os02g27592	expressed protein
Val	2	QTL_02_16376081	2	-31	LOC_Os02g27594	expressed protein
Val	2	QTL_02_16376081	2	-24	LOC_Os02g27600	hypothetical protein
Val	2	QTL_02_16376081	2	-22	LOC_Os02g27610	hypothetical protein
Val	2	QTL_02_16376081	2	-17	LOC_Os02g27620	endonuclease/exonuclease/phosphatase family domain containing protein, expressed
Val	2	QTL_02_16376081	2	-5	LOC_Os02g27630	retrotransposon protein, putative, unclassified
Val	2	QTL_02_16376081	2	-1	LOC_Os02g27640	retrotransposon protein, putative, Ty3-gypsy subclass
Val	2	QTL_02_16376081	2	8	LOC_Os02g27660	hypothetical protein
Val	2	QTL_02_16376081	2	13	LOC_Os02g27670	hypothetical protein
Val	2	QTL_02_16376081	2	15	LOC_Os02g27674	expressed protein
Val	2	QTL_02_16376081	2	22	LOC_Os02g27680	NB-ARC domain containing protein
Val	2	QTL_02_16376081	2	24	LOC_Os02g27690	Leucine Rich Repeat family protein
Val	2	QTL_02_16376081	2	27	LOC_Os02g27700	retrotransposon protein, putative, unclassified
Val	2	QTL_02_16376081	2	30	LOC_Os02g27710	disease resistance protein, putative
Val	2	QTL_02_16376081	2	37	LOC_Os02g27720	retrotransposon protein, putative, unclassified
Val	2	QTL_02_16376081	2	42	LOC_Os02g27730	conserved hypothetical protein
Val	2	QTL_02_16376081	2	44	LOC_Os02g27740	expressed protein
Val	2	QTL_02_16376081	2	50	LOC_Os02g27750	transposon protein, putative, unclassified
Val	2	QTL_02_16376081	2	58	LOC_Os02g27760	40S ribosomal protein S15a, putative, expressed
Val	2	QTL_02_16376081	2	63	LOC_Os02g27769	40S ribosomal protein S27, putative, expressed
Val	2	QTL_02_16376081	2	67	LOC_Os02g27780	hypothetical protein
Val	2	QTL_02_16376081	2	67	LOC_Os02g27790	splicing factor 3B subunit 1, putative, expressed
Val	2	QTL_02_16376081	2	73	LOC_Os02g27800	conserved hypothetical protein
Val	2	QTL_02_16376081	2	83	LOC_Os02g27810	MazG nucleotide pyrophosphohydrolase domain containing protein, expressed
Val	2	QTL_02_16376081	2	88	LOC_Os02g27820	conserved hypothetical protein
Val	2	QTL_02_16376081	2	95	LOC_Os02g27830	conserved hypothetical protein
Val	2	QTL_02_16376081	2	103	LOC_Os02g27840	hypothetical protein
Val	2	QTL_02_16376081	2	105	LOC_Os02g27850	retrotransposon protein, putative, unclassified, expressed
Val	2	QTL_02_16376081	2	111	LOC_Os02g27870	expressed protein
Val	3	QTL_02_23416703	2	-118	LOC_Os02g38540	retrotransposon protein, putative, Ty3-gypsy subclass
Val	3	QTL_02_23416703	2	-113	LOC_Os02g38550	retrotransposon protein, putative, Ty3-gypsy subclass
Val	3	QTL_02_23416703	2	-109	LOC_Os02g38560	retrotransposon protein, putative, unclassified
Val	3	QTL_02_23416703	2	-106	LOC_Os02g38570	retrotransposon protein, putative, unclassified
Val	3	QTL_02_23416703	2	-98	LOC_Os02g38572	EMB2423, putative, expressed
Val	3	QTL_02_23416703	2	-96	LOC_Os02g38574	EMB2423, putative
Val	3	QTL_02_23416703	2	-90	LOC_Os02g38580	protein phosphatase 2C, putative, expressed
Val	3	QTL_02_23416703	2	-88	LOC_Os02g38589	OsFBX55 - F-box domain containing protein, expressed
Val	3	QTL_02_23416703	2	-87	LOC_Os02g38598	expressed protein
Val	3	QTL_02_23416703	2	-84	LOC_Os02g38610	retrotransposon protein, putative, unclassified
Val	3	QTL_02_23416703	2	-78	LOC_Os02g38620	retrotransposon protein, putative, Ty3-gypsy subclass
Val	3	QTL_02_23416703	2	-71	LOC_Os02g38630	retrotransposon protein, putative, Ty3-gypsy subclass
Val	3	QTL_02_23416703	2	-66	LOC_Os02g38640	retrotransposon protein, putative, Ty3-gypsy subclass
Val	3	QTL_02_23416703	2	-60	LOC_Os02g38650	retrotransposon protein, putative, Ty3-gypsy subclass
Val	3	QTL_02_23416703	2	-51	LOC_Os02g38660	retrotransposon protein, putative, unclassified
Val	3	QTL_02_23416703	2	-47	LOC_Os02g38670	retrotransposon protein, putative, unclassified
Val	3	QTL_02_23416703	2	-37	LOC_Os02g38680	EMB2423, putative
Val	3	QTL_02_23416703	2	-30	LOC_Os02g38690	protein phosphatase 2C containing protein
Val	3	QTL_02_23416703	2	-25	LOC_Os02g38700	transposon protein, putative, Ac/Ds sub-class
Val	3	QTL_02_23416703	2	-17	LOC_Os02g38710	protein phosphatase 2C containing protein, expressed
Val	3	QTL_02_23416703	2	-16	LOC_Os02g38720	OsFBX56 - F-box domain containing protein
Val	3	QTL_02_23416703	2	-13	LOC_Os02g38730	hypothetical protein
Val	3	QTL_02_23416703	2	-5	LOC_Os02g38740	expressed protein
Val	3	QTL_02_23416703	2	-3	LOC_Os02g38750	hypothetical protein
Val	3	QTL_02_23416703	2	4	LOC_Os02g38770	hypothetical protein
Val	3	QTL_02_23416703	2	9	LOC_Os02g38780	protein phosphatase 2C containing protein, expressed
Val	3	QTL_02_23416703	2	21	LOC_Os02g38790	expressed protein
Val	3	QTL_02_23416703	2	27	LOC_Os02g38795	hypothetical protein
Val	3	QTL_02_23416703	2	29	LOC_Os02g38800	26S proteasome non-ATPase regulatory subunit 6, putative, expressed
Val	3	QTL_02_23416703	2	32	LOC_Os02g38804	protein phosphatase 2C containing protein, expressed
Val	3	QTL_02_23416703	2	38	LOC_Os02g38810	26S proteasome non-ATPase regulatory subunit 6, putative, expressed
Val	3	QTL_02_23416703	2	43	LOC_Os02g38820	expressed protein
Val	3	QTL_02_23416703	2	51	LOC_Os02g38830	retrotransposon protein, putative, unclassified
Val	3	QTL_02_23416703	2	57	LOC_Os02g38840	glucose-6-phosphate 1-dehydrogenase, cytoplasmic isoform, putative, expressed
Val	3	QTL_02_23416703	2	72	LOC_Os02g38850	hypothetical protein
Val	3	QTL_02_23416703	2	72	LOC_Os02g38860	expressed protein
Val	3	QTL_02_23416703	2	84	LOC_Os02g38870	hypothetical protein
Val	3	QTL_02_23416703	2	85	LOC_Os02g38880	hypothetical protein
Val	3	QTL_02_23416703	2	90	LOC_Os02g38890	hypothetical protein
Val	3	QTL_02_23416703	2	91	LOC_Os02g38900	cytosolic Fe-S cluster assembling factor NBP35, putative, expressed
Val	3	QTL_02_23416703	2	97	LOC_Os02g38910	hypothetical protein
Val	3	QTL_02_23416703	2	104	LOC_Os02g38920	glyceraldehyde-3-phosphate dehydrogenase, putative, expressed
Val	3	QTL_02_23416703	2	108	LOC_Os02g38930	cytochrome P450 71D7, putative
Val	3	QTL_02_23416703	2	112	LOC_Os02g38940	cytochrome P450, putative, expressed
Val	3	QTL_02_23416703	2	115	LOC_Os02g38950	PPR repeat containing protein, expressed
Val	3	QTL_02_23416703	2	118	LOC_Os02g38960	hypothetical protein
Val	4	QTL_02_24287444	2	-116	LOC_Os02g39980	hypothetical protein
Val	4	QTL_02_24287444	2	-112	LOC_Os02g39990	expressed protein
Val	4	QTL_02_24287444	2	-91	LOC_Os02g40000	trafficking protein particle complex subunit, putative, expressed
Val	4	QTL_02_24287444	2	-64	LOC_Os02g40010	phosphoribosyl transferase, putative, expressed
Val	4	QTL_02_24287444	2	-64	LOC_Os02g40020	hypothetical protein
Val	4	QTL_02_24287444	2	-53	LOC_Os02g40030	transporter family protein, putative, expressed
Val	4	QTL_02_24287444	2	-50	LOC_Os02g40040	expressed protein
Val	4	QTL_02_24287444	2	-38	LOC_Os02g40050	retrotransposon protein, putative, unclassified
Val	4	QTL_02_24287444	2	-35	LOC_Os02g40060	retrotransposon protein, putative, unclassified
Val	4	QTL_02_24287444	2	-27	LOC_Os02g40070	AP2-like ethylene-responsive transcription factor PLETHORA 2, putative, expressed
Val	4	QTL_02_24287444	2	-23	LOC_Os02g40080	tic20, putative, expressed
Val	4	QTL_02_24287444	2	-19	LOC_Os02g40090	transporter-related, putative, expressed
Val	4	QTL_02_24287444	2	-12	LOC_Os02g40100	plant protein of unknown function DUF869 domain containing protein, expressed
Val	4	QTL_02_24287444	2	-8	LOC_Os02g40110	expressed protein
Val	4	QTL_02_24287444	2	-3	LOC_Os02g40120	hypothetical protein
Val	4	QTL_02_24287444	2	6	LOC_Os02g40140	transposon protein, putative, unclassified
Val	4	QTL_02_24287444	2	12	LOC_Os02g40150	retrotransposon protein, putative, unclassified
Val	4	QTL_02_24287444	2	14	LOC_Os02g40160	retrotransposon protein, putative, unclassified
Val	4	QTL_02_24287444	2	18	LOC_Os02g40170	retrotransposon protein, putative, unclassified
Val	4	QTL_02_24287444	2	22	LOC_Os02g40180	receptor-like protein kinase 5 precursor, putative, expressed
Val	4	QTL_02_24287444	2	30	LOC_Os02g40190	receptor kinase, putative
Val	4	QTL_02_24287444	2	33	LOC_Os02g40200	receptor-like protein kinase precursor, putative, expressed
Val	4	QTL_02_24287444	2	39	LOC_Os02g40210	hypothetical protein
Val	4	QTL_02_24287444	2	40	LOC_Os02g40220	retrotransposon protein, putative, Ty1-copia subclass
Val	4	QTL_02_24287444	2	41	LOC_Os02g40230	retrotransposon protein, putative, Ty1-copia subclass
Val	4	QTL_02_24287444	2	57	LOC_Os02g40240	receptor kinase, putative, expressed
Val	4	QTL_02_24287444	2	67	LOC_Os02g40250	retrotransposon protein, putative, unclassified
Val	4	QTL_02_24287444	2	79	LOC_Os02g40260	uncharacterized protein At4g06744 precursor, putative, expressed
Val	4	QTL_02_24287444	2	87	LOC_Os02g40270	expressed protein
Val	4	QTL_02_24287444	2	97	LOC_Os02g40280	piwi domain containing protein, putative, expressed
Val	4	QTL_02_24287444	2	104	LOC_Os02g40300	retrotransposon protein, putative, unclassified
Val	4	QTL_02_24287444	2	107	LOC_Os02g40310	retrotransposon protein, putative, unclassified
Val	4	QTL_02_24287444	2	110	LOC_Os02g40320	PINHEAD, putative
Val	4	QTL_02_24287444	2	115	LOC_Os02g40330	retrotransposon protein, putative, Ty3-gypsy subclass, expressed
Val	5	QTL_04_00762059	4	-118	LOC_Os04g02040	NBS-LRR, putative
Val	5	QTL_04_00762059	4	-112	LOC_Os04g02050	bifunctional 3-phosphoadenosine 5-phosphosulfate synthetase, putative, expressed
Val	5	QTL_04_00762059	4	-104	LOC_Os04g02060	hypothetical protein
Val	5	QTL_04_00762059	4	-95	LOC_Os04g02070	expressed protein
Val	5	QTL_04_00762059	4	-90	LOC_Os04g02080	retrotransposon protein, putative, unclassified
Val	5	QTL_04_00762059	4	-86	LOC_Os04g02090	retrotransposon protein, putative, unclassified
Val	5	QTL_04_00762059	4	-82	LOC_Os04g02100	hypothetical protein
Val	5	QTL_04_00762059	4	-75	LOC_Os04g02110	disease resistance protein RGA3, putative, expressed
Val	5	QTL_04_00762059	4	-67	LOC_Os04g02120	expressed protein
Val	5	QTL_04_00762059	4	-58	LOC_Os04g02130	retrotransposon protein, putative, unclassified
Val	5	QTL_04_00762059	4	-51	LOC_Os04g02140	transposon protein, putative, CACTA, En/Spm sub-class, expressed
Val	5	QTL_04_00762059	4	-40	LOC_Os04g02150	tRNA methyltransferase, putative, expressed
Val	5	QTL_04_00762059	4	-39	LOC_Os04g02160	conserved hypothetical protein
Val	5	QTL_04_00762059	4	-26	LOC_Os04g02180	retrotransposon, putative, centromere-specific
Val	5	QTL_04_00762059	4	-4	LOC_Os04g02200	retrotransposon protein, putative, unclassified
Val	5	QTL_04_00762059	4	-3	LOC_Os04g02210	retrotransposon protein, putative, Ty3-gypsy subclass
Val	5	QTL_04_00762059	4	1	LOC_Os04g02230	retrotransposon, putative, centromere-specific
Val	5	QTL_04_00762059	4	11	LOC_Os04g02240	retrotransposon protein, putative, Ty3-gypsy subclass
Val	5	QTL_04_00762059	4	15	LOC_Os04g02250	retrotransposon protein, putative, Ty3-gypsy subclass
Val	5	QTL_04_00762059	4	22	LOC_Os04g02264	retrotransposon protein, putative, Ty3-gypsy subclass
Val	5	QTL_04_00762059	4	30	LOC_Os04g02280	OsFBX114 - F-box domain containing protein, expressed
Val	5	QTL_04_00762059	4	36	LOC_Os04g02300	retrotransposon protein, putative, unclassified
Val	5	QTL_04_00762059	4	41	LOC_Os04g02310	retrotransposon protein, putative, Ty1-copia subclass
Val	5	QTL_04_00762059	4	49	LOC_Os04g02320	retrotransposon protein, putative, Ty1-copia subclass
Val	5	QTL_04_00762059	4	51	LOC_Os04g02330	retrotransposon protein, putative, Ty1-copia subclass
Val	5	QTL_04_00762059	4	57	LOC_Os04g02340	retrotransposon protein, putative, unclassified
Val	5	QTL_04_00762059	4	65	LOC_Os04g02350	transposon protein, putative, unclassified
Val	5	QTL_04_00762059	4	72	LOC_Os04g02354	expressed protein
Val	5	QTL_04_00762059	4	74	LOC_Os04g02360	transposon protein, putative, CACTA, En/Spm sub-class
Val	5	QTL_04_00762059	4	81	LOC_Os04g02370	transposon protein, putative, unclassified
Val	5	QTL_04_00762059	4	91	LOC_Os04g02375	hypothetical protein
Val	5	QTL_04_00762059	4	92	LOC_Os04g02380	hypothetical protein
Val	5	QTL_04_00762059	4	95	LOC_Os04g02390	transposon protein, putative, CACTA, En/Spm sub-class
Val	5	QTL_04_00762059	4	98	LOC_Os04g02400	conserved hypothetical protein
Val	5	QTL_04_00762059	4	105	LOC_Os04g02410	hypothetical protein
Val	5	QTL_04_00762059	4	109	LOC_Os04g02420	transposon protein, putative, unclassified
Val	5	QTL_04_00762059	4	117	LOC_Os04g02434	transposon protein, putative, unclassified
Val	6	QTL_04_03651481	4	-117	LOC_Os04g06710	hypothetical protein
Val	6	QTL_04_03651481	4	-107	LOC_Os04g06734	expressed protein
Val	6	QTL_04_03651481	4	-104	LOC_Os04g06760	hypothetical protein
Val	6	QTL_04_03651481	4	-92	LOC_Os04g06770	argonaute, putative, expressed
Val	6	QTL_04_03651481	4	-90	LOC_Os04g06780	hypothetical protein
Val	6	QTL_04_03651481	4	-74	LOC_Os04g06790	2-aminoethanethiol dioxygenase, putative, expressed
Val	6	QTL_04_03651481	4	-72	LOC_Os04g06800	hypothetical protein
Val	6	QTL_04_03651481	4	-67	LOC_Os04g06810	expressed protein
Val	6	QTL_04_03651481	4	-58	LOC_Os04g06820	retrotransposon protein, putative, unclassified
Val	6	QTL_04_03651481	4	-55	LOC_Os04g06830	hypothetical protein
Val	6	QTL_04_03651481	4	-47	LOC_Os04g06840	conserved hypothetical protein
Val	6	QTL_04_03651481	4	-42	LOC_Os04g06850	expressed protein
Val	6	QTL_04_03651481	4	-37	LOC_Os04g06860	peroxidase 28 precursor, putative
Val	6	QTL_04_03651481	4	-28	LOC_Os04g06870	retrotransposon protein, putative, unclassified
Val	6	QTL_04_03651481	4	-26	LOC_Os04g06879	hypothetical protein
Val	6	QTL_04_03651481	4	-23	LOC_Os04g06890	conserved hypothetical protein
Val	6	QTL_04_03651481	4	-17	LOC_Os04g06900	expressed protein
Val	6	QTL_04_03651481	4	-5	LOC_Os04g06910	conserved hypothetical protein
Val	6	QTL_04_03651481	4	5	LOC_Os04g06930	retrotransposon protein, putative, unclassified
Val	6	QTL_04_03651481	4	7	LOC_Os04g06940	retrotransposon protein, putative, unclassified
Val	6	QTL_04_03651481	4	10	LOC_Os04g06950	conserved hypothetical protein
Val	6	QTL_04_03651481	4	12	LOC_Os04g06960	retrotransposon protein, putative, unclassified
Val	6	QTL_04_03651481	4	15	LOC_Os04g06970	retrotransposon protein, putative, unclassified
Val	6	QTL_04_03651481	4	22	LOC_Os04g06980	retrotransposon protein, putative, Ty3-gypsy subclass
Val	6	QTL_04_03651481	4	26	LOC_Os04g06990	conserved hypothetical protein
Val	6	QTL_04_03651481	4	85	LOC_Os04g07000	retrotransposon protein, putative, unclassified
Val	6	QTL_04_03651481	4	81	LOC_Os04g07010	transposon protein, putative, CACTA, En/Spm sub-class
Val	6	QTL_04_03651481	4	74	LOC_Os04g07020	retrotransposon protein, putative, Ty3-gypsy subclass
Val	6	QTL_04_03651481	4	71	LOC_Os04g07030	retrotransposon protein, putative, Ty3-gypsy subclass
Val	6	QTL_04_03651481	4	68	LOC_Os04g07040	conserved hypothetical protein
Val	6	QTL_04_03651481	4	49	LOC_Os04g07050	hypothetical protein
Val	6	QTL_04_03651481	4	35	LOC_Os04g07060	retrotransposon protein, putative, Ty3-gypsy subclass
Val	6	QTL_04_03651481	4	93	LOC_Os04g07070	retrotransposon protein, putative, unclassified
Val	6	QTL_04_03651481	4	90	LOC_Os04g07080	retrotransposon protein, putative, unclassified
Val	6	QTL_04_03651481	4	97	LOC_Os04g07090	retrotransposon protein, putative, unclassified
Val	6	QTL_04_03651481	4	103	LOC_Os04g07100	retrotransposon protein, putative, unclassified
Val	6	QTL_04_03651481	4	110	LOC_Os04g07110	expressed protein
Val	7	QTL_05_19754561	5	-118	LOC_Os05g33530	hypothetical protein
Val	7	QTL_05_19754561	5	-112	LOC_Os05g33550	methyl-binding domain protein MBD, putative, expressed
Val	7	QTL_05_19754561	5	-109	LOC_Os05g33554	methyl-binding domain protein MBD, putative, expressed
Val	7	QTL_05_19754561	5	-101	LOC_Os05g33560	hypothetical protein
Val	7	QTL_05_19754561	5	-79	LOC_Os05g33570	pyruvate, phosphate dikinase, chloroplast precursor, putative, expressed
Val	7	QTL_05_19754561	5	-76	LOC_Os05g33580	expressed protein
Val	7	QTL_05_19754561	5	-72	LOC_Os05g33590	cytochrome P450, putative, expressed
Val	7	QTL_05_19754561	5	-58	LOC_Os05g33600	cytochrome P450 72A1, putative, expressed
Val	7	QTL_05_19754561	5	-42	LOC_Os05g33610	expressed protein
Val	7	QTL_05_19754561	5	-36	LOC_Os05g33620	expressed protein
Val	7	QTL_05_19754561	5	-31	LOC_Os05g33630	inosine-uridine preferring nucleoside hydrolase family protein, putative, expressed
Val	7	QTL_05_19754561	5	-11	LOC_Os05g33644	inosine-uridine preferring nucleoside hydrolase family protein, putative, expressed
Val	7	QTL_05_19754561	5	-5	LOC_Os05g33660	hypothetical protein
Val	7	QTL_05_19754561	5	-3	LOC_Os05g33670	hypothetical protein
Val	7	QTL_05_19754561	5	11	LOC_Os05g33690	receptor-like protein kinase precursor, putative, expressed
Val	7	QTL_05_19754561	5	16	LOC_Os05g33700	4F5 protein family protein
Val	7	QTL_05_19754561	5	20	LOC_Os05g33710	WD domain, G-beta repeat domain containing protein, expressed
Val	7	QTL_05_19754561	5	46	LOC_Os05g33720	retrotransposon protein, putative, unclassified
Val	7	QTL_05_19754561	5	51	LOC_Os05g33730	gibberellin receptor GID1L2, putative, expressed
Val	7	QTL_05_19754561	5	59	LOC_Os05g33740	retrotransposon protein, putative, unclassified
Val	7	QTL_05_19754561	5	61	LOC_Os05g33750	retrotransposon protein, putative, unclassified
Val	7	QTL_05_19754561	5	77	LOC_Os05g33760	PPR repeat domain containing protein, putative, expressed
Val	7	QTL_05_19754561	5	83	LOC_Os05g33770	conserved hypothetical protein
Val	7	QTL_05_19754561	5	85	LOC_Os05g33780	hypothetical protein
Val	7	QTL_05_19754561	5	93	LOC_Os05g33790	retrotransposon protein, putative, Ty1-copia subclass
Val	7	QTL_05_19754561	5	100	LOC_Os05g33800	retrotransposon, putative, centromere-specific
Val	7	QTL_05_19754561	5	106	LOC_Os05g33810	OsSPL9 - SBP-box gene family member, expressed
Val	7	QTL_05_19754561	5	117	LOC_Os05g33820	lipase, putative, expressed
Val	8	QTL_06_18538935	6	-121	LOC_Os06g31700	transposon protein, putative, CACTA, En/Spm sub-class
Val	8	QTL_06_18538935	6	-118	LOC_Os06g31710	retrotransposon, putative, centromere-specific
Val	8	QTL_06_18538935	6	-113	LOC_Os06g31720	retrotransposon protein, putative, unclassified
Val	8	QTL_06_18538935	6	-104	LOC_Os06g31730	retrotransposon protein, putative, Ty3-gypsy subclass
Val	8	QTL_06_18538935	6	-101	LOC_Os06g31740	retrotransposon protein, putative, unclassified
Val	8	QTL_06_18538935	6	-96	LOC_Os06g31750	retrotransposon protein, putative, unclassified
Val	8	QTL_06_18538935	6	-93	LOC_Os06g31760	retrotransposon protein, putative, unclassified
Val	8	QTL_06_18538935	6	-87	LOC_Os06g31770	conserved hypothetical protein
Val	8	QTL_06_18538935	6	-85	LOC_Os06g31780	retrotransposon protein, putative, unclassified
Val	8	QTL_06_18538935	6	-76	LOC_Os06g31790	retrotransposon protein, putative, Ty3-gypsy subclass
Val	8	QTL_06_18538935	6	-71	LOC_Os06g31800	THION2 - Plant thionin family protein precursor, expressed
Val	8	QTL_06_18538935	6	-65	LOC_Os06g31810	hypothetical protein
Val	8	QTL_06_18538935	6	-60	LOC_Os06g31820	transposon protein, putative, CACTA, En/Spm sub-class
Val	8	QTL_06_18538935	6	-52	LOC_Os06g31830	retrotransposon protein, putative, Ty3-gypsy subclass
Val	8	QTL_06_18538935	6	-41	LOC_Os06g31840	retrotransposon protein, putative, Ty3-gypsy subclass
Val	8	QTL_06_18538935	6	-32	LOC_Os06g31850	retrotransposon protein, putative, unclassified
Val	8	QTL_06_18538935	6	-26	LOC_Os06g31860	retrotransposon protein, putative, unclassified
Val	8	QTL_06_18538935	6	-19	LOC_Os06g31870	retrotransposon protein, putative, Ty3-gypsy subclass
Val	8	QTL_06_18538935	6	-17	LOC_Os06g31880	retrotransposon protein, putative, Ty3-gypsy subclass
Val	8	QTL_06_18538935	6	-14	LOC_Os06g31890	THION3 - Plant thionin family protein precursor, expressed
Val	8	QTL_06_18538935	6	-5	LOC_Os06g31900	retrotransposon protein, putative, unclassified
Val	8	QTL_06_18538935	6	9	LOC_Os06g31920	retrotransposon, putative, centromere-specific
Val	8	QTL_06_18538935	6	17	LOC_Os06g31930	thionin precursor protein, putative, expressed
Val	8	QTL_06_18538935	6	24	LOC_Os06g31940	transposon protein, putative, CACTA, En/Spm sub-class
Val	8	QTL_06_18538935	6	29	LOC_Os06g31950	retrotransposon, putative, centromere-specific
Val	8	QTL_06_18538935	6	38	LOC_Os06g31960	THION5 - Plant thionin family protein precursor, expressed
Val	8	QTL_06_18538935	6	44	LOC_Os06g31980	transposon protein, putative, CACTA, En/Spm sub-class
Val	8	QTL_06_18538935	6	47	LOC_Os06g31990	retrotransposon, putative, centromere-specific
Val	8	QTL_06_18538935	6	58	LOC_Os06g32000	retrotransposon protein, putative, Ty3-gypsy subclass
Val	8	QTL_06_18538935	6	62	LOC_Os06g32010	retrotransposon protein, putative, Ty3-gypsy subclass
Val	8	QTL_06_18538935	6	75	LOC_Os06g32020	THION6 - Plant thionin family protein precursor, expressed
Val	8	QTL_06_18538935	6	82	LOC_Os06g32030	transposon protein, putative, CACTA, En/Spm sub-class
Val	8	QTL_06_18538935	6	87	LOC_Os06g32040	transposon protein, putative, unclassified
Val	8	QTL_06_18538935	6	90	LOC_Os06g32050	retrotransposon protein, putative, Ty3-gypsy subclass
Val	8	QTL_06_18538935	6	104	LOC_Os06g32060	retrotransposon protein, putative, Ty3-gypsy subclass
Val	8	QTL_06_18538935	6	114	LOC_Os06g32070	retrotransposon protein, putative, Ty3-gypsy subclass
Val	8	QTL_06_18538935	6	115	LOC_Os06g32080	retrotransposon protein, putative, Ty3-gypsy subclass
Val	9	QTL_09_00526550	9	-118	LOC_Os09g01580	hypothetical protein
Val	9	QTL_09_00526550	9	-108	LOC_Os09g01590	triacylglycerol lipase 1 precursor, putative, expressed
Val	9	QTL_09_00526550	9	-100	LOC_Os09g01600	expressed protein
Val	9	QTL_09_00526550	9	-95	LOC_Os09g01610	clumping factor B, putative, expressed
Val	9	QTL_09_00526550	9	-84	LOC_Os09g01620	RNA pseudouridine synthase, putative, expressed
Val	9	QTL_09_00526550	9	-75	LOC_Os09g01630	transposon protein, putative, CACTA, En/Spm sub-class, expressed
Val	9	QTL_09_00526550	9	-69	LOC_Os09g01640	CAX-interacting protein 4, putative, expressed
Val	9	QTL_09_00526550	9	-54	LOC_Os09g01650	peptidyl-prolyl cis-trans isomerase, FKBP-type, putative, expressed
Val	9	QTL_09_00526550	9	-52	LOC_Os09g01660	hypothetical protein
Val	9	QTL_09_00526550	9	-42	LOC_Os09g01670	peptidyl-prolyl cis-trans isomerase, FKBP-type, putative
Val	9	QTL_09_00526550	9	-36	LOC_Os09g01680	DNA repair protein RAD51 homolog 4, putative, expressed
Val	9	QTL_09_00526550	9	-33	LOC_Os09g01690	expressed protein
Val	9	QTL_09_00526550	9	-29	LOC_Os09g01700	conserved hypothetical protein
Val	9	QTL_09_00526550	9	-19	LOC_Os09g01720	retrotransposon protein, putative, unclassified
Val	9	QTL_09_00526550	9	-12	LOC_Os09g01730	retrotransposon protein, putative, unclassified
Val	9	QTL_09_00526550	9	-8	LOC_Os09g01740	retrotransposon protein, putative, Ty3-gypsy subclass
Val	9	QTL_09_00526550	9	-1	LOC_Os09g01750	transposon protein, putative, CACTA, En/Spm sub-class
Val	9	QTL_09_00526550	9	0	LOC_Os09g01760	transposon protein, putative, CACTA, En/Spm sub-class
Val	9	QTL_09_00526550	9	6	LOC_Os09g01770	transposon protein, putative, CACTA, En/Spm sub-class
Val	9	QTL_09_00526550	9	12	LOC_Os09g01780	transposon protein, putative, unclassified
Val	9	QTL_09_00526550	9	17	LOC_Os09g01790	conserved hypothetical protein
Val	9	QTL_09_00526550	9	25	LOC_Os09g01800	retrotransposon protein, putative, unclassified
Val	9	QTL_09_00526550	9	32	LOC_Os09g01810	retrotransposon protein, putative, Ty3-gypsy subclass
Val	9	QTL_09_00526550	9	35	LOC_Os09g01820	retrotransposon protein, putative, Ty3-gypsy subclass
Val	9	QTL_09_00526550	9	42	LOC_Os09g01830	retrotransposon protein, putative, unclassified
Val	9	QTL_09_00526550	9	49	LOC_Os09g01840	retrotransposon protein, putative, unclassified
Val	9	QTL_09_00526550	9	57	LOC_Os09g01850	retrotransposon protein, putative, Ty3-gypsy subclass
Val	9	QTL_09_00526550	9	65	LOC_Os09g01860	hypothetical protein
Val	9	QTL_09_00526550	9	67	LOC_Os09g01870	transposon protein, putative, unclassified
Val	9	QTL_09_00526550	9	68	LOC_Os09g01880	transposon protein, putative, unclassified
Val	9	QTL_09_00526550	9	72	LOC_Os09g01890	conserved hypothetical protein
Val	9	QTL_09_00526550	9	77	LOC_Os09g01900	transposon protein, putative, CACTA, En/Spm sub-class
Val	9	QTL_09_00526550	9	82	LOC_Os09g01910	transposon protein, putative, CACTA, En/Spm sub-class
Val	9	QTL_09_00526550	9	96	LOC_Os09g01930	hypothetical protein
Val	9	QTL_09_00526550	9	99	LOC_Os09g01940	hypothetical protein
Val	9	QTL_09_00526550	9	110	LOC_Os09g01950	hypothetical protein
Val	10	QTL_09_09185340	9	-116	LOC_Os09g15030	retrotransposon protein, putative, Ty1-copia subclass
Val	10	QTL_09_09185340	9	-111	LOC_Os09g15040	hypothetical protein
Val	10	QTL_09_09185340	9	-97	LOC_Os09g15044	expressed protein
Val	10	QTL_09_09185340	9	-85	LOC_Os09g15050	ent-kaurene synthase A, chloroplast precursor, putative, expressed
Val	10	QTL_09_09185340	9	-74	LOC_Os09g15060	hypothetical protein
Val	10	QTL_09_09185340	9	-64	LOC_Os09g15070	hypothetical protein
Val	10	QTL_09_09185340	9	-56	LOC_Os09g15080	retrotransposon protein, putative, unclassified
Val	10	QTL_09_09185340	9	-35	LOC_Os09g15090	transposon protein, putative, CACTA, En/Spm sub-class
Val	10	QTL_09_09185340	9	-32	LOC_Os09g15100	retrotransposon protein, putative, unclassified
Val	10	QTL_09_09185340	9	-27	LOC_Os09g15110	hypothetical protein
Val	10	QTL_09_09185340	9	-6	LOC_Os09g15120	retrotransposon protein, putative, Ty3-gypsy subclass
Val	10	QTL_09_09185340	9	-3	LOC_Os09g15130	retrotransposon protein, putative, Ty3-gypsy subclass
Val	10	QTL_09_09185340	9	0	LOC_Os09g15140	retrotransposon protein, putative, unclassified
Val	10	QTL_09_09185340	9	12	LOC_Os09g15150	hypothetical protein
Val	10	QTL_09_09185340	9	15	LOC_Os09g15160	retrotransposon protein, putative, unclassified
Val	10	QTL_09_09185340	9	20	LOC_Os09g15170	nucleobase-ascorbate transporter, putative, expressed
Val	10	QTL_09_09185340	9	28	LOC_Os09g15180	transposon protein, putative, unclassified
Val	10	QTL_09_09185340	9	34	LOC_Os09g15190	conserved hypothetical protein
Val	10	QTL_09_09185340	9	42	LOC_Os09g15200	ankyrin repeat family protein, putative
Val	10	QTL_09_09185340	9	47	LOC_Os09g15210	retrotransposon protein, putative, unclassified
Val	10	QTL_09_09185340	9	51	LOC_Os09g15220	retrotransposon protein, putative, unclassified, expressed
Val	10	QTL_09_09185340	9	59	LOC_Os09g15230	expressed protein
Val	10	QTL_09_09185340	9	64	LOC_Os09g15240	carotenoid cleavage dioxygenase, putative, expressed
Val	10	QTL_09_09185340	9	77	LOC_Os09g15250	retrotransposon protein, putative, unclassified, expressed
Val	10	QTL_09_09185340	9	97	LOC_Os09g15260	hypothetical protein
Val	11	QTL_09_14864565	9	-111	LOC_Os09g24760	retrotransposon protein, putative, unclassified
Val	11	QTL_09_14864565	9	-105	LOC_Os09g24770	retrotransposon protein, putative, unclassified
Val	11	QTL_09_14864565	9	-103	LOC_Os09g24780	retrotransposon protein, putative, unclassified
Val	11	QTL_09_14864565	9	-99	LOC_Os09g24790	retrotransposon protein, putative, unclassified
Val	11	QTL_09_14864565	9	-88	LOC_Os09g24800	MYB family transcription factor, putative
Val	11	QTL_09_14864565	9	-71	LOC_Os09g24810	ZF-HD protein dimerisation region containing protein, expressed
Val	11	QTL_09_14864565	9	-49	LOC_Os09g24820	ZF-HD protein dimerisation region containing protein, expressed
Val	11	QTL_09_14864565	9	-43	LOC_Os09g24830	hypothetical protein
Val	11	QTL_09_14864565	9	-35	LOC_Os09g24840	GASR10 - Gibberellin-regulated GASA/GAST/Snakin family protein precursor, expressed
Val	11	QTL_09_14864565	9	-26	LOC_Os09g24850	retrotransposon protein, putative, unclassified, expressed
Val	11	QTL_09_14864565	9	-24	LOC_Os09g24860	hypothetical protein
Val	11	QTL_09_14864565	9	-17	LOC_Os09g24870	expressed protein
Val	11	QTL_09_14864565	9	-4	LOC_Os09g24880	retrotransposon protein, putative, unclassified
Val	11	QTL_09_14864565	9	0	LOC_Os09g24890	hypothetical protein
Val	11	QTL_09_14864565	9	1	LOC_Os09g24900	methyltransferase, putative, expressed
Val	11	QTL_09_14864565	9	5	LOC_Os09g24910	phosphofructokinase, putative, expressed
Val	11	QTL_09_14864565	9	21	LOC_Os09g24924	transporter family protein, putative, expressed
Val	11	QTL_09_14864565	9	29	LOC_Os09g24940	conserved hypothetical protein
Val	11	QTL_09_14864565	9	30	LOC_Os09g24954	double-stranded RNA binding motif containing protein, expressed
Val	11	QTL_09_14864565	9	47	LOC_Os09g24965	expressed protein
Val	11	QTL_09_14864565	9	51	LOC_Os09g24970	expressed protein
Val	11	QTL_09_14864565	9	56	LOC_Os09g24980	vesicle transport v-SNARE protein, putative, expressed
Val	11	QTL_09_14864565	9	63	LOC_Os09g24990	CAF1 family ribonuclease containing protein, putative, expressed
Val	11	QTL_09_14864565	9	72	LOC_Os09g25000	spotted leaf 11, putative, expressed
Val	11	QTL_09_14864565	9	80	LOC_Os09g25010	hypothetical protein
Val	11	QTL_09_14864565	9	91	LOC_Os09g25030	hypothetical protein
Val	11	QTL_09_14864565	9	93	LOC_Os09g25040	joka8, putative, expressed
Val	11	QTL_09_14864565	9	105	LOC_Os09g25050	PPR repeat domain containing protein, putative, expressed
Val	11	QTL_09_14864565	9	110	LOC_Os09g25060	OsWRKY76 - Superfamily of TFs having WRKY and zinc finger domains, expressed
Val	12	QTL_09_18724630	9	-112	LOC_Os09g30486	fasciclin domain containing protein, expressed
Val	12	QTL_09_18724630	9	-106	LOC_Os09g30490	EF hand family protein, expressed
Val	12	QTL_09_18724630	9	-94	LOC_Os09g30494	retrotransposon protein, putative, Ty3-gypsy subclass
Val	12	QTL_09_18724630	9	-89	LOC_Os09g30498	hypothetical protein
Val	12	QTL_09_18724630	9	-86	LOC_Os09g30502	transposon protein, putative, unclassified
Val	12	QTL_09_18724630	9	-83	LOC_Os09g30506	EF hand family protein, expressed
Val	12	QTL_09_18724630	9	-81	LOC_Os09g30510	glucosyl transferase, putative, expressed
Val	12	QTL_09_18724630	9	-70	LOC_Os09g30970	retrotransposon protein, putative, Ty3-gypsy subclass
Val	12	QTL_09_18724630	9	-66	LOC_Os09g30980	UDP-glucoronosyl and UDP-glucosyl transferase domain containing protein, expressed
Val	12	QTL_09_18724630	9	-64	LOC_Os09g30990	hypothetical protein
Val	12	QTL_09_18724630	9	-61	LOC_Os09g31000	EF hand family protein, expressed
Val	12	QTL_09_18724630	9	-59	LOC_Os09g31019	ubiquitin fusion protein, putative
Val	12	QTL_09_18724630	9	-57	LOC_Os09g31025	EF hand family protein, expressed
Val	12	QTL_09_18724630	9	-53	LOC_Os09g31031	ubiquitin family protein, putative, expressed
Val	12	QTL_09_18724630	9	-52	LOC_Os09g31040	EF hand family protein, putative, expressed
Val	12	QTL_09_18724630	9	-50	LOC_Os09g31050	cytosolic phospholipase A2 beta, putative, expressed
Val	12	QTL_09_18724630	9	-49	LOC_Os09g31060	hypothetical protein
Val	12	QTL_09_18724630	9	-38	LOC_Os09g31080	induced stolen tip protein TUB8, putative, expressed
Val	12	QTL_09_18724630	9	-31	LOC_Os09g31090	HECT-domain domain containing protein, expressed
Val	12	QTL_09_18724630	9	-23	LOC_Os09g31100	hypothetical protein
Val	12	QTL_09_18724630	9	-15	LOC_Os09g31120	pirin, putative, expressed
Val	12	QTL_09_18724630	9	-6	LOC_Os09g31130	citrate transporter, putative, expressed
Val	12	QTL_09_18724630	9	9	LOC_Os09g31140	ZOS9-16 - C2H2 zinc finger protein, expressed
Val	12	QTL_09_18724630	9	14	LOC_Os09g31160	glutamate receptor precursor, putative
Val	12	QTL_09_18724630	9	23	LOC_Os09g31170	expressed protein
Val	12	QTL_09_18724630	9	26	LOC_Os09g31180	ribosomal protein L6, putative, expressed
Val	12	QTL_09_18724630	9	29	LOC_Os09g31190	slowmo homolog, putative
Val	12	QTL_09_18724630	9	35	LOC_Os09g31200	AN1-like zinc finger domain containing protein, expressed
Val	12	QTL_09_18724630	9	44	LOC_Os09g31210	AGC_PVPK_like_CDK8.1 - ACG kinases include homologs to PKA, PKG and PKC, expressed
Val	12	QTL_09_18724630	9	53	LOC_Os09g31220	expressed protein
Val	12	QTL_09_18724630	9	57	LOC_Os09g31230	expressed protein
Val	12	QTL_09_18724630	9	63	LOC_Os09g31240	retrotransposon protein, putative, unclassified
Val	12	QTL_09_18724630	9	66	LOC_Os09g31250	transposon protein, putative, unclassified
Val	12	QTL_09_18724630	9	73	LOC_Os09g31260	expressed protein
Val	12	QTL_09_18724630	9	75	LOC_Os09g31270	polygalacturonase, putative, expressed
Val	12	QTL_09_18724630	9	80	LOC_Os09g31280	OTU-like cysteine protease family protein, putative, expressed
Val	12	QTL_09_18724630	9	86	LOC_Os09g31290	hypothetical protein
Val	12	QTL_09_18724630	9	88	LOC_Os09g31300	helix-loop-helix DNA-binding domain containing protein, expressed
Val	12	QTL_09_18724630	9	99	LOC_Os09g31310	acetyltransferase, GNAT family, putative, expressed
Val	12	QTL_09_18724630	9	111	LOC_Os09g31330	hypothetical protein
Val	12	QTL_09_18724630	9	114	LOC_Os09g31340	hypothetical protein
Val	13	QTL_10_09752934	10	-108	LOC_Os10g19064	retrotransposon protein, putative, Ty1-copia subclass
Val	13	QTL_10_09752934	10	-104	LOC_Os10g19080	retrotransposon protein, putative, Ty3-gypsy subclass
Val	13	QTL_10_09752934	10	-99	LOC_Os10g19090	retrotransposon, putative, centromere-specific
Val	13	QTL_10_09752934	10	-97	LOC_Os10g19100	hypothetical protein
Val	13	QTL_10_09752934	10	-93	LOC_Os10g19110	cytochrome P450, putative
Val	13	QTL_10_09752934	10	-87	LOC_Os10g19120	retrotransposon protein, putative, Ty3-gypsy subclass
Val	13	QTL_10_09752934	10	-81	LOC_Os10g19130	retrotransposon protein, putative, Ty3-gypsy subclass
Val	13	QTL_10_09752934	10	-76	LOC_Os10g19140	cytochrome P450 87A3, putative, expressed
Val	13	QTL_10_09752934	10	-68	LOC_Os10g19150	retrotransposon protein, putative, unclassified
Val	13	QTL_10_09752934	10	-63	LOC_Os10g19160	receptor kinase, putative, expressed
Val	13	QTL_10_09752934	10	-47	LOC_Os10g19180	zinc finger family protein, putative, expressed
Val	13	QTL_10_09752934	10	-42	LOC_Os10g19190	vesicle transport protein GOT1B, putative, expressed
Val	13	QTL_10_09752934	10	-39	LOC_Os10g19200	vegetative cell wall protein gp1 precursor, putative, expressed
Val	13	QTL_10_09752934	10	-38	LOC_Os10g19210	retrotransposon protein, putative, unclassified
Val	13	QTL_10_09752934	10	-32	LOC_Os10g19230	hypothetical protein
Val	13	QTL_10_09752934	10	-24	LOC_Os10g19240	retrotransposon protein, putative, LINE subclass
Val	13	QTL_10_09752934	10	-20	LOC_Os10g19250	hypothetical protein
Val	13	QTL_10_09752934	10	-7	LOC_Os10g19270	retrotransposon protein, putative, Ty3-gypsy subclass, expressed
Val	13	QTL_10_09752934	10	0	LOC_Os10g19280	retrotransposon protein, putative, Ty1-copia subclass
Val	13	QTL_10_09752934	10	0	LOC_Os10g19290	retrotransposon protein, putative, Ty1-copia subclass
Val	13	QTL_10_09752934	10	4	LOC_Os10g19300	expressed protein
Val	13	QTL_10_09752934	10	13	LOC_Os10g19310	transposon protein, putative, CACTA, En/Spm sub-class
Val	13	QTL_10_09752934	10	20	LOC_Os10g19314	hypothetical protein
Val	13	QTL_10_09752934	10	21	LOC_Os10g19318	hypothetical protein
Val	13	QTL_10_09752934	10	22	LOC_Os10g19322	transposon protein, putative, CACTA, En/Spm sub-class
Val	13	QTL_10_09752934	10	29	LOC_Os10g19326	transposon protein, putative, CACTA, En/Spm sub-class
Val	13	QTL_10_09752934	10	35	LOC_Os10g19330	hypothetical protein
Val	13	QTL_10_09752934	10	36	LOC_Os10g19331	expressed protein
Val	13	QTL_10_09752934	10	37	LOC_Os10g19334	alpha-1,2-fucosidase, putative, expressed
Val	13	QTL_10_09752934	10	45	LOC_Os10g19338	retrotransposon protein, putative, Ty1-copia subclass
Val	13	QTL_10_09752934	10	54	LOC_Os10g19342	IQ calmodulin-binding motif family protein, putative
Val	13	QTL_10_09752934	10	57	LOC_Os10g19810	transposon protein, putative, CACTA, En/Spm sub-class
Val	13	QTL_10_09752934	10	59	LOC_Os10g19820	hypothetical protein
Val	13	QTL_10_09752934	10	62	LOC_Os10g19830	transposon protein, putative, Mariner sub-class
Val	13	QTL_10_09752934	10	71	LOC_Os10g19850	expressed protein
Val	13	QTL_10_09752934	10	83	LOC_Os10g19860	XI-I, putative, expressed
Val	13	QTL_10_09752934	10	96	LOC_Os10g19880	alpha-1,2-fucosidase, putative, expressed
Val	13	QTL_10_09752934	10	110	LOC_Os10g19890	retrotransposon protein, putative, LINE subclass
Val	13	QTL_10_09752934	10	117	LOC_Os10g19892	conserved hypothetical protein
Val	14	QTL_11_00696362	11	-115	LOC_Os11g02120	transposon protein, putative, CACTA, En/Spm sub-class
Val	14	QTL_11_00696362	11	-111	LOC_Os11g02130	peroxidase precursor, putative, expressed
Val	14	QTL_11_00696362	11	-106	LOC_Os11g02140	hypothetical protein
Val	14	QTL_11_00696362	11	-102	LOC_Os11g02150	saposin-like type B, region 1 family protein, putative, expressed
Val	14	QTL_11_00696362	11	-96	LOC_Os11g02159	expressed protein
Val	14	QTL_11_00696362	11	-95	LOC_Os11g02165	LTPL57 - Protease inhibitor/seed storage/LTP family protein precursor, expressed
Val	14	QTL_11_00696362	11	-90	LOC_Os11g02180	dual specificity protein phosphatase, putative, expressed
Val	14	QTL_11_00696362	11	-81	LOC_Os11g02190	expressed protein
Val	14	QTL_11_00696362	11	-77	LOC_Os11g02200	expressed protein
Val	14	QTL_11_00696362	11	-75	LOC_Os11g02210	hypothetical protein
Val	14	QTL_11_00696362	11	-72	LOC_Os11g02220	retrotransposon protein, putative, SINE subclass
Val	14	QTL_11_00696362	11	-69	LOC_Os11g02230	hypothetical protein
Val	14	QTL_11_00696362	11	-63	LOC_Os11g02240	CAMK_KIN1/SNF1/Nim1_like.4 - CAMK includes calcium/calmodulin depedent protein kinases, expressed
Val	14	QTL_11_00696362	11	-55	LOC_Os11g02250	zinc finger, C3HC4 type domain containing protein
Val	14	QTL_11_00696362	11	-54	LOC_Os11g02260	zinc finger, C3HC4 type domain containing protein
Val	14	QTL_11_00696362	11	-48	LOC_Os11g02270	expressed protein
Val	14	QTL_11_00696362	11	-47	LOC_Os11g02280	hypothetical protein
Val	14	QTL_11_00696362	11	-45	LOC_Os11g02290	expressed protein
Val	14	QTL_11_00696362	11	-36	LOC_Os11g02300	CPuORF36 - conserved peptide uORF-containing transcript, expressed
Val	14	QTL_11_00696362	11	-37	LOC_Os11g02305	expressed protein
Val	14	QTL_11_00696362	11	-21	LOC_Os11g02310	pentatricopeptide, putative, expressed
Val	14	QTL_11_00696362	11	-25	LOC_Os11g02320	nucleotidyltransferase, putative, expressed
Val	14	QTL_11_00696362	11	-16	LOC_Os11g02330	LTPL22 - Protease inhibitor/seed storage/LTP family protein precursor, expressed
Val	14	QTL_11_00696362	11	-13	LOC_Os11g02340	hypothetical protein
Val	14	QTL_11_00696362	11	-11	LOC_Os11g02350	LTPL25 - Protease inhibitor/seed storage/LTP family protein precursor, expressed
Val	14	QTL_11_00696362	11	-9	LOC_Os11g02360	hypothetical protein
Val	14	QTL_11_00696362	11	-3	LOC_Os11g02369	LTPL7 - Protease inhibitor/seed storage/LTP family protein precursor, expressed
Val	14	QTL_11_00696362	11	0	LOC_Os11g02379	LTPL6 - Protease inhibitor/seed storage/LTP family protein precursor, expressed
Val	14	QTL_11_00696362	11	5	LOC_Os11g02389	protease inhibitor/seed storage/LTP family, putative, expressed
Val	14	QTL_11_00696362	11	18	LOC_Os11g02400	LTPL8 - Protease inhibitor/seed storage/LTP family protein precursor, expressed
Val	14	QTL_11_00696362	11	23	LOC_Os11g02410	hypothetical protein
Val	14	QTL_11_00696362	11	25	LOC_Os11g02424	LTPL9 - Protease inhibitor/seed storage/LTP family protein precursor, expressed
Val	14	QTL_11_00696362	11	31	LOC_Os11g02440	chalcone--flavonone isomerase, putative, expressed
Val	14	QTL_11_00696362	11	36	LOC_Os11g02450	elongation factor P, putative, expressed
Val	14	QTL_11_00696362	11	40	LOC_Os11g02460	outer membrane protein, OMP85 family, putative, expressed
Val	14	QTL_11_00696362	11	45	LOC_Os11g02464	vacuolar-sorting receptor precursor, putative, expressed
Val	14	QTL_11_00696362	11	52	LOC_Os11g02470	OsWRKY52 - Superfamily of TFs having WRKY and zinc finger domains, expressed
Val	14	QTL_11_00696362	11	62	LOC_Os11g02480	OsWRKY46 - Superfamily of TFs having WRKY and zinc finger domains, expressed
Val	14	QTL_11_00696362	11	73	LOC_Os11g02490	transposon protein, putative, unclassified
Val	14	QTL_11_00696362	11	79	LOC_Os11g02500	hypothetical protein
Val	14	QTL_11_00696362	11	81	LOC_Os11g02510	hypothetical protein
Val	14	QTL_11_00696362	11	84	LOC_Os11g02520	WRKY DNA-binding domain containing protein, expressed
Val	14	QTL_11_00696362	11	90	LOC_Os11g02530	OsWRKY40 - Superfamily of TFs having WRKY and zinc finger domains, expressed
Val	14	QTL_11_00696362	11	95	LOC_Os11g02540	OsWRKY50 - Superfamily of TFs having WRKY and zinc finger domains, expressed
Val	14	QTL_11_00696362	11	104	LOC_Os11g02550	expressed protein
Val	14	QTL_11_00696362	11	114	LOC_Os11g02570	esterase, putative, expressed
Val	14	QTL_11_00696362	11	116	LOC_Os11g02580	esterase, putative, expressed
Val	14	QTL_11_00696362	11	119	LOC_Os11g02590	retrotransposon protein, putative, unclassified
Val	15	QTL_11_16029050	11	-117	LOC_Os11g28440	retrotransposon protein, putative, Ty1-copia subclass
Val	15	QTL_11_16029050	11	-115	LOC_Os11g28450	hypothetical protein
Val	15	QTL_11_16029050	11	-113	LOC_Os11g28460	hypothetical protein
Val	15	QTL_11_16029050	11	-107	LOC_Os11g28470	conserved hypothetical protein
Val	15	QTL_11_16029050	11	-98	LOC_Os11g28480	hypothetical protein
Val	15	QTL_11_16029050	11	-84	LOC_Os11g28490	ent-kaurene synthase B, chloroplast precursor, putative
Val	15	QTL_11_16029050	11	-81	LOC_Os11g28500	terpene synthase, N-terminal domain containing protein
Val	15	QTL_11_16029050	11	-75	LOC_Os11g28510	conserved hypothetical protein
Val	15	QTL_11_16029050	11	-69	LOC_Os11g28520	retrotransposon protein, putative, unclassified
Val	15	QTL_11_16029050	11	-44	LOC_Os11g28530	terpene synthase, putative, expressed
Val	15	QTL_11_16029050	11	-37	LOC_Os11g28540	expressed protein
Val	15	QTL_11_16029050	11	-22	LOC_Os11g28550	retrotransposon protein, putative, Ty1-copia subclass
Val	15	QTL_11_16029050	11	-18	LOC_Os11g28560	retrotransposon protein, putative, Ty3-gypsy subclass
Val	15	QTL_11_16029050	11	-14	LOC_Os11g28570	retrotransposon protein, putative, Ty3-gypsy subclass
Val	15	QTL_11_16029050	11	-12	LOC_Os11g28580	retrotransposon protein, putative, Ty3-gypsy subclass
Val	15	QTL_11_16029050	11	-8	LOC_Os11g28590	retrotransposon protein, putative, Ty1-copia subclass
Val	15	QTL_11_16029050	11	12	LOC_Os11g28600	expressed protein
Val	15	QTL_11_16029050	11	15	LOC_Os11g28610	transporter family protein, putative, expressed
Val	15	QTL_11_16029050	11	41	LOC_Os11g28619	retrotransposon protein, putative, Ty1-copia subclass
Val	15	QTL_11_16029050	11	53	LOC_Os11g28628	retrotransposon protein, putative, Ty1-copia subclass
Val	15	QTL_11_16029050	11	63	LOC_Os11g28640	hypothetical protein
Val	15	QTL_11_16029050	11	76	LOC_Os11g28650	retrotransposon protein, putative, unclassified
Val	15	QTL_11_16029050	11	79	LOC_Os11g28660	retrotransposon protein, putative, unclassified
Val	15	QTL_11_16029050	11	83	LOC_Os11g28670	hypothetical protein
Val	15	QTL_11_16029050	11	87	LOC_Os11g28680	hypothetical protein
Val	15	QTL_11_16029050	11	95	LOC_Os11g28690	retrotransposon protein, putative, Ty3-gypsy subclass
Val	15	QTL_11_16029050	11	98	LOC_Os11g28700	retrotransposon protein, putative, Ty3-gypsy subclass
Val	15	QTL_11_16029050	11	116	LOC_Os11g28710	hypothetical protein
Val	15	QTL_11_16029050	11	117	LOC_Os11g28720	retrotransposon protein, putative, Ty3-gypsy subclass
Leu	1	QTL_01_07089989	1	-114	LOC_Os01g12660	AAA-type ATPase family protein, putative, expressed
Leu	1	QTL_01_07089989	1	-105	LOC_Os01g12670	expressed protein
Leu	1	QTL_01_07089989	1	-96	LOC_Os01g12680	C4-dicarboxylate transporter/malic acid transport protein, expressed
Leu	1	QTL_01_07089989	1	-80	LOC_Os01g12690	plant-specific domain TIGR01568 family protein, expressed
Leu	1	QTL_01_07089989	1	-72	LOC_Os01g12700	MYB family transcription factor, putative
Leu	1	QTL_01_07089989	1	-60	LOC_Os01g12710	oxidoreductase, short chain dehydrogenase/reductase family domain containing protein, expressed
Leu	1	QTL_01_07089989	1	-48	LOC_Os01g12720	protein kinase domain containing protein, expressed
Leu	1	QTL_01_07089989	1	-43	LOC_Os01g12730	ras-related protein, putative, expressed
Leu	1	QTL_01_07089989	1	-40	LOC_Os01g12740	cytochrome P450, putative, expressed
Leu	1	QTL_01_07089989	1	-34	LOC_Os01g12750	cytochrome P450, putative, expressed
Leu	1	QTL_01_07089989	1	-25	LOC_Os01g12760	cytochrome P450, putative, expressed
Leu	1	QTL_01_07089989	1	-17	LOC_Os01g12770	cytochrome P450, putative, expressed
Leu	1	QTL_01_07089989	1	-14	LOC_Os01g12780	hypothetical protein
Leu	1	QTL_01_07089989	1	-5	LOC_Os01g12790	receptor protein kinase, putative
Leu	1	QTL_01_07089989	1	-1	LOC_Os01g12800	peroxisomal membrane protein, putative, expressed
Leu	1	QTL_01_07089989	1	1	LOC_Os01g12810	retrotransposon protein, putative, unclassified, expressed
Leu	1	QTL_01_07089989	1	4	LOC_Os01g12820	harpin-induced protein, putative, expressed
Leu	1	QTL_01_07089989	1	9	LOC_Os01g12830	erythronate-4-phosphate dehydrogenase domain containing protein, expressed
Leu	1	QTL_01_07089989	1	13	LOC_Os01g12840	expressed protein
Leu	1	QTL_01_07089989	1	20	LOC_Os01g12850	hypothetical protein
Leu	1	QTL_01_07089989	1	24	LOC_Os01g12860	MYB family transcription factor, putative, expressed
Leu	1	QTL_01_07089989	1	34	LOC_Os01g12870	eukaryotic translation initiation factor 3 subunit E-interacting protein, putative, expressed
Leu	1	QTL_01_07089989	1	38	LOC_Os01g12880	VHS and GAT domain containing protein, expressed
Leu	1	QTL_01_07089989	1	66	LOC_Os01g12890	expressed protein
Leu	1	QTL_01_07089989	1	73	LOC_Os01g12900	ras-related protein, putative, expressed
Leu	1	QTL_01_07089989	1	82	LOC_Os01g12910	thioesterase family protein, putative, expressed
Leu	1	QTL_01_07089989	1	85	LOC_Os01g12920	thioesterase family protein, putative, expressed
Leu	1	QTL_01_07089989	1	86	LOC_Os01g12930	U-box domain containing protein, expressed
Leu	1	QTL_01_07089989	1	94	LOC_Os01g12940	phosphorylase domain containing protein, putative
Leu	2	QTL_01_10944343	1	-113	LOC_Os01g19170	polygalacturonase, putative, expressed
Leu	2	QTL_01_10944343	1	-107	LOC_Os01g19180	hypothetical protein
Leu	2	QTL_01_10944343	1	-85	LOC_Os01g19190	retrotransposon protein, putative, unclassified
Leu	2	QTL_01_10944343	1	-82	LOC_Os01g19200	retrotransposon protein, putative, unclassified
Leu	2	QTL_01_10944343	1	-78	LOC_Os01g19210	transposon protein, putative, unclassified
Leu	2	QTL_01_10944343	1	-71	LOC_Os01g19220	beta-D-xylosidase, putative, expressed
Leu	2	QTL_01_10944343	1	-69	LOC_Os01g19230	conserved hypothetical protein
Leu	2	QTL_01_10944343	1	-63	LOC_Os01g19240	integral membrane protein DUF6 containing protein
Leu	2	QTL_01_10944343	1	-59	LOC_Os01g19250	hypothetical protein
Leu	2	QTL_01_10944343	1	-51	LOC_Os01g19260	ATPase, putative, expressed
Leu	2	QTL_01_10944343	1	-47	LOC_Os01g19270	expressed protein
Leu	2	QTL_01_10944343	1	-44	LOC_Os01g19280	expressed protein
Leu	2	QTL_01_10944343	1	-30	LOC_Os01g19290	integral membrane protein DUF6 containing protein, expressed
Leu	2	QTL_01_10944343	1	-22	LOC_Os01g19300	retrotransposon protein, putative, unclassified
Leu	2	QTL_01_10944343	1	-16	LOC_Os01g19310	retrotransposon protein, putative, unclassified
Leu	2	QTL_01_10944343	1	-12	LOC_Os01g19320	hypothetical protein
Leu	2	QTL_01_10944343	1	-9	LOC_Os01g19330	MYB family transcription factor, putative, expressed
Leu	2	QTL_01_10944343	1	5	LOC_Os01g19350	hypothetical protein
Leu	2	QTL_01_10944343	1	7	LOC_Os01g19360	retrotransposon protein, putative, Ty1-copia subclass
Leu	2	QTL_01_10944343	1	15	LOC_Os01g19370	retrotransposon protein, putative, unclassified
Leu	2	QTL_01_10944343	1	19	LOC_Os01g19380	pentatricopeptide, putative
Leu	2	QTL_01_10944343	1	23	LOC_Os01g19390	glycerol-3-phosphate acyltransferase, putative
Leu	2	QTL_01_10944343	1	31	LOC_Os01g19400	expressed protein
Leu	2	QTL_01_10944343	1	35	LOC_Os01g19410	expressed protein
Leu	2	QTL_01_10944343	1	40	LOC_Os01g19420	transposon protein, putative, unclassified, expressed
Leu	2	QTL_01_10944343	1	45	LOC_Os01g19430	3-5 exonuclease domain-containing protein, putative, expressed
Leu	2	QTL_01_10944343	1	52	LOC_Os01g19440	pectinesterase, putative
Leu	2	QTL_01_10944343	1	53	LOC_Os01g19450	ATP-citrate synthase subunit 1, putative, expressed
Leu	2	QTL_01_10944343	1	68	LOC_Os01g19460	retrotransposon protein, putative, unclassified
Leu	2	QTL_01_10944343	1	80	LOC_Os01g19470	nodal modulator 1 precursor, putative, expressed
Leu	2	QTL_01_10944343	1	113	LOC_Os01g19480	kelch motif family protein, putative, expressed
Leu	3	QTL_01_23419417	1	-117	LOC_Os01g41160	FAD dependent oxidoreductase domain containing protein, expressed
Leu	3	QTL_01_23419417	1	-107	LOC_Os01g41170	THION27 - Plant thionin family protein precursor, expressed
Leu	3	QTL_01_23419417	1	-106	LOC_Os01g41180	THION19 - Plant thionin family protein precursor, putative, expressed
Leu	3	QTL_01_23419417	1	-97	LOC_Os01g41190	glycine-rich protein, putative, expressed
Leu	3	QTL_01_23419417	1	-95	LOC_Os01g41200	heavy metal-associated domain containing protein, expressed
Leu	3	QTL_01_23419417	1	-88	LOC_Os01g41210	transposon protein, putative, unclassified, expressed
Leu	3	QTL_01_23419417	1	-82	LOC_Os01g41220	DUF538 domain containing protein, putative, expressed
Leu	3	QTL_01_23419417	1	-81	LOC_Os01g41230	hypothetical protein
Leu	3	QTL_01_23419417	1	-75	LOC_Os01g41240	hydrolase, alpha/beta fold family domain containing protein, expressed
Leu	3	QTL_01_23419417	1	-71	LOC_Os01g41250	OsFBX17 - F-box domain containing protein, expressed
Leu	3	QTL_01_23419417	1	-66	LOC_Os01g41260	OsFBD2 - F-box and FBD domain containing protein
Leu	3	QTL_01_23419417	1	-60	LOC_Os01g41270	OsFBD3 - F-box and FBD domain containing protein, expressed
Leu	3	QTL_01_23419417	1	-58	LOC_Os01g41280	OsFBD4 - F-box and FBD domain containing protein, expressed
Leu	3	QTL_01_23419417	1	-54	LOC_Os01g41290	OsFBD5 - F-box and FBD domain containing protein, expressed
Leu	3	QTL_01_23419417	1	-52	LOC_Os01g41300	hypothetical protein
Leu	3	QTL_01_23419417	1	-41	LOC_Os01g41310	OsFBX18 - F-box domain containing protein, expressed
Leu	3	QTL_01_23419417	1	-35	LOC_Os01g41320	hypothetical protein
Leu	3	QTL_01_23419417	1	-32	LOC_Os01g41330	hypothetical protein
Leu	3	QTL_01_23419417	1	-25	LOC_Os01g41340	OsFBL1 - F-box domain and LRR containing protein
Leu	3	QTL_01_23419417	1	-19	LOC_Os01g41350	hypothetical protein
Leu	3	QTL_01_23419417	1	-16	LOC_Os01g41360	expressed protein
Leu	3	QTL_01_23419417	1	-9	LOC_Os01g41370	FBD domain containing protein, putative, expressed
Leu	3	QTL_01_23419417	1	3	LOC_Os01g41390	retrotransposon, putative, centromere-specific
Leu	3	QTL_01_23419417	1	19	LOC_Os01g41400	transmembrane amino acid transporter protein, putative, expressed
Leu	3	QTL_01_23419417	1	21	LOC_Os01g41410	hypothetical protein
Leu	3	QTL_01_23419417	1	26	LOC_Os01g41420	transmembrane amino acid transporter protein, putative, expressed
Leu	3	QTL_01_23419417	1	35	LOC_Os01g41430	UDP-glucoronosyl and UDP-glucosyl transferase, putative, expressed
Leu	3	QTL_01_23419417	1	40	LOC_Os01g41440	retrotransposon protein, putative, unclassified
Leu	3	QTL_01_23419417	1	43	LOC_Os01g41450	UDP-glucoronosyl and UDP-glucosyl transferase domain containing protein
Leu	3	QTL_01_23419417	1	51	LOC_Os01g41460	retrotransposon protein, putative, Ty3-gypsy subclass
Leu	3	QTL_01_23419417	1	58	LOC_Os01g41470	retrotransposon protein, putative, Ty3-gypsy subclass
Leu	3	QTL_01_23419417	1	61	LOC_Os01g41480	retrotransposon protein, putative, Ty3-gypsy subclass
Leu	3	QTL_01_23419417	1	64	LOC_Os01g41490	retrotransposon protein, putative, Ty3-gypsy subclass
Leu	3	QTL_01_23419417	1	67	LOC_Os01g41500	retrotransposon protein, putative, unclassified
Leu	3	QTL_01_23419417	1	77	LOC_Os01g41510	calcineurin B, putative, expressed
Leu	3	QTL_01_23419417	1	83	LOC_Os01g41516	retrotransposon protein, putative, Ty1-copia subclass
Leu	3	QTL_01_23419417	1	86	LOC_Os01g41522	retrotransposon protein, putative, unclassified
Leu	3	QTL_01_23419417	1	89	LOC_Os01g41530	OsFBL2 - F-box domain and LRR containing protein, expressed
Leu	3	QTL_01_23419417	1	92	LOC_Os01g41540	hypothetical protein
Leu	3	QTL_01_23419417	1	94	LOC_Os01g41550	aspartic proteinase, putative, expressed
Leu	3	QTL_01_23419417	1	101	LOC_Os01g41560	hypothetical protein
Leu	3	QTL_01_23419417	1	109	LOC_Os01g41565	ATP-binding domain-containing protein, putative
Leu	4	QTL_01_34820524	1	-99	LOC_Os01g60040	HEAT repeat family protein, putative, expressed
Leu	4	QTL_01_34820524	1	-86	LOC_Os01g60050	HEAT, putative
Leu	4	QTL_01_34820524	1	-77	LOC_Os01g60060	leucine-rich repeat family protein, putative, expressed
Leu	4	QTL_01_34820524	1	-75	LOC_Os01g60070	conserved hypothetical protein
Leu	4	QTL_01_34820524	1	-72	LOC_Os01g60080	monocopper oxidase, putative, expressed
Leu	4	QTL_01_34820524	1	-66	LOC_Os01g60090	retrotransposon protein, putative, unclassified
Leu	4	QTL_01_34820524	1	-63	LOC_Os01g60100	transposon protein, putative, unclassified
Leu	4	QTL_01_34820524	1	-49	LOC_Os01g60110	E2F-related protein, putative, expressed
Leu	4	QTL_01_34820524	1	-40	LOC_Os01g60120	transmembrane protein 56, putative, expressed
Leu	4	QTL_01_34820524	1	-35	LOC_Os01g60130	hypothetical protein
Leu	4	QTL_01_34820524	1	-29	LOC_Os01g60140	ATCHX15, putative, expressed
Leu	4	QTL_01_34820524	1	-24	LOC_Os01g60150	hypothetical protein
Leu	4	QTL_01_34820524	1	-20	LOC_Os01g60160	hypothetical protein
Leu	4	QTL_01_34820524	1	-19	LOC_Os01g60170	DUF567 domain containing protein, putative, expressed
Leu	4	QTL_01_34820524	1	-17	LOC_Os01g60180	hypothetical protein
Leu	4	QTL_01_34820524	1	-13	LOC_Os01g60190	2,3-bisphosphoglycerate-independent phosphoglycerate mutase, putative, expressed
Leu	4	QTL_01_34820524	1	-9	LOC_Os01g60200	expressed protein
Leu	4	QTL_01_34820524	1	1	LOC_Os01g60210	transposon protein, putative, unclassified
Leu	4	QTL_01_34820524	1	2	LOC_Os01g60220	transposon protein, putative, unclassified
Leu	4	QTL_01_34820524	1	12	LOC_Os01g60230	auxin efflux carrier component, putative, expressed
Leu	4	QTL_01_34820524	1	20	LOC_Os01g60250	pentatricopeptide, putative, expressed
Leu	4	QTL_01_34820524	1	30	LOC_Os01g60260	KH domain containing protein, putative, expressed
Leu	4	QTL_01_34820524	1	40	LOC_Os01g60270	homeobox domain containing protein, expressed
Leu	4	QTL_01_34820524	1	46	LOC_Os01g60280	ATP binding protein, putative, expressed
Leu	4	QTL_01_34820524	1	63	LOC_Os01g60290	expressed protein
Leu	4	QTL_01_34820524	1	66	LOC_Os01g60309	retrotransposon protein, putative, Ty1-copia subclass
Leu	4	QTL_01_34820524	1	77	LOC_Os01g60330	inactive receptor kinase At2g26730 precursor, putative, expressed
Leu	4	QTL_01_34820524	1	80	LOC_Os01g60340	NTMC2Type1.1 protein, putative
Leu	4	QTL_01_34820524	1	86	LOC_Os01g60350	hypothetical protein
Leu	4	QTL_01_34820524	1	96	LOC_Os01g60360	ubiquitin-conjugating enzyme, putative
Leu	4	QTL_01_34820524	1	99	LOC_Os01g60369	retrotransposon protein, putative, Ty3-gypsy subclass
Leu	4	QTL_01_34820524	1	103	LOC_Os01g60380	retrotransposon protein, putative, Ty3-gypsy subclass
Leu	4	QTL_01_34820524	1	108	LOC_Os01g60389	retrotransposon protein, putative, Ty3-gypsy subclass
Leu	4	QTL_01_34820524	1	112	LOC_Os01g60400	retrotransposon protein, putative, Ty3-gypsy subclass
Leu	4	QTL_01_34820524	1	116	LOC_Os01g60410	ubiquitin-conjugating enzyme, putative, expressed
Leu	5	QTL_02_24189963	2	-111	LOC_Os02g39850	transferase family protein, putative, expressed
Leu	5	QTL_02_24189963	2	-106	LOC_Os02g39860	retrotransposon protein, putative, unclassified
Leu	5	QTL_02_24189963	2	-101	LOC_Os02g39870	co-chaperone GrpE protein, putative, expressed
Leu	5	QTL_02_24189963	2	-98	LOC_Os02g39880	expressed protein
Leu	5	QTL_02_24189963	2	-95	LOC_Os02g39884	expressed protein
Leu	5	QTL_02_24189963	2	-92	LOC_Os02g39890	RNA recognition motif containing protein, putative, expressed
Leu	5	QTL_02_24189963	2	-81	LOC_Os02g39900	transposon protein, putative, unclassified
Leu	5	QTL_02_24189963	2	-56	LOC_Os02g39910	B4-BTB1 - Bric-a-Brac, Tramtrack, Broad Complex BTB domain with B4 subfamily conserved sequence, expressed
Leu	5	QTL_02_24189963	2	-49	LOC_Os02g39920	AT hook motif family protein, expressed
Leu	5	QTL_02_24189963	2	-42	LOC_Os02g39930	OsTIL-1 Temperature-induced lipocalin-1, expressed
Leu	5	QTL_02_24189963	2	-39	LOC_Os02g39940	hypothetical protein
Leu	5	QTL_02_24189963	2	-32	LOC_Os02g39950	EF hand family protein, putative, expressed
Leu	5	QTL_02_24189963	2	-30	LOC_Os02g39960	exostosin family protein, putative
Leu	5	QTL_02_24189963	2	-21	LOC_Os02g39970	regulatory subunit, putative, expressed
Leu	5	QTL_02_24189963	2	-18	LOC_Os02g39980	hypothetical protein
Leu	5	QTL_02_24189963	2	-14	LOC_Os02g39990	expressed protein
Leu	5	QTL_02_24189963	2	0	LOC_Os02g40000	trafficking protein particle complex subunit, putative, expressed
Leu	5	QTL_02_24189963	2	27	LOC_Os02g40010	phosphoribosyl transferase, putative, expressed
Leu	5	QTL_02_24189963	2	33	LOC_Os02g40020	hypothetical protein
Leu	5	QTL_02_24189963	2	39	LOC_Os02g40030	transporter family protein, putative, expressed
Leu	5	QTL_02_24189963	2	44	LOC_Os02g40040	expressed protein
Leu	5	QTL_02_24189963	2	58	LOC_Os02g40050	retrotransposon protein, putative, unclassified
Leu	5	QTL_02_24189963	2	60	LOC_Os02g40060	retrotransposon protein, putative, unclassified
Leu	5	QTL_02_24189963	2	65	LOC_Os02g40070	AP2-like ethylene-responsive transcription factor PLETHORA 2, putative, expressed
Leu	5	QTL_02_24189963	2	72	LOC_Os02g40080	tic20, putative, expressed
Leu	5	QTL_02_24189963	2	74	LOC_Os02g40090	transporter-related, putative, expressed
Leu	5	QTL_02_24189963	2	80	LOC_Os02g40100	plant protein of unknown function DUF869 domain containing protein, expressed
Leu	5	QTL_02_24189963	2	87	LOC_Os02g40110	expressed protein
Leu	5	QTL_02_24189963	2	92	LOC_Os02g40120	hypothetical protein
Leu	5	QTL_02_24189963	2	97	LOC_Os02g40130	leucine-rich, putative, expressed
Leu	5	QTL_02_24189963	2	104	LOC_Os02g40140	transposon protein, putative, unclassified
Leu	5	QTL_02_24189963	2	109	LOC_Os02g40150	retrotransposon protein, putative, unclassified
Leu	5	QTL_02_24189963	2	111	LOC_Os02g40160	retrotransposon protein, putative, unclassified
Leu	5	QTL_02_24189963	2	115	LOC_Os02g40170	retrotransposon protein, putative, unclassified
Leu	6	QTL_02_25758513	2	-119	LOC_Os02g42630	hypothetical protein
Leu	6	QTL_02_25758513	2	-116	LOC_Os02g42640	CBS domain-containing protein, putative, expressed
Leu	6	QTL_02_25758513	2	-104	LOC_Os02g42650	expansin precursor, putative, expressed
Leu	6	QTL_02_25758513	2	-100	LOC_Os02g42660	sphingolipid delta desaturase, putative, expressed
Leu	6	QTL_02_25758513	2	-91	LOC_Os02g42670	DUF1771 domain containing protein, putative, expressed
Leu	6	QTL_02_25758513	2	-87	LOC_Os02g42690	zinc finger, C3HC4 type domain containing protein, expressed
Leu	6	QTL_02_25758513	2	-80	LOC_Os02g42700	thioredoxin, putative, expressed
Leu	6	QTL_02_25758513	2	-77	LOC_Os02g42710	C2 domain containing protein, putative, expressed
Leu	6	QTL_02_25758513	2	-74	LOC_Os02g42720	hypothetical protein
Leu	6	QTL_02_25758513	2	-67	LOC_Os02g42730	expressed protein
Leu	6	QTL_02_25758513	2	-65	LOC_Os02g42740	cytochrome b5-like Heme/Steroid binding domain containing protein, expressed
Leu	6	QTL_02_25758513	2	-49	LOC_Os02g42750	retrotransposon protein, putative, Ty3-gypsy subclass
Leu	6	QTL_02_25758513	2	-44	LOC_Os02g42760	retrotransposon protein, putative, unclassified
Leu	6	QTL_02_25758513	2	-41	LOC_Os02g42770	retrotransposon protein, putative, unclassified
Leu	6	QTL_02_25758513	2	-38	LOC_Os02g42780	lectin receptor-type protein kinase, putative, expressed
Leu	6	QTL_02_25758513	2	-34	LOC_Os02g42790	short-chain dehydrogenase/reductase, putative
Leu	6	QTL_02_25758513	2	-32	LOC_Os02g42800	expressed protein
Leu	6	QTL_02_25758513	2	-27	LOC_Os02g42810	oxidoreductase, short chain dehydrogenase/reductase family domain containing protein, expressed
Leu	6	QTL_02_25758513	2	-23	LOC_Os02g42820	OsPLIM2a - LIM domain protein, putative actin-binding protein and transcription factor, expressed
Leu	6	QTL_02_25758513	2	-17	LOC_Os02g42830	retrotransposon protein, putative, unclassified
Leu	6	QTL_02_25758513	2	-16	LOC_Os02g42840	retrotransposon protein, putative, LINE subclass
Leu	6	QTL_02_25758513	2	-1	LOC_Os02g42850	MYB family transcription factor, putative, expressed
Leu	6	QTL_02_25758513	2	2	LOC_Os02g42860	DEAD-box ATP-dependent RNA helicase, putative, expressed
Leu	6	QTL_02_25758513	2	13	LOC_Os02g42870	MYB family transcription factor, putative, expressed
Leu	6	QTL_02_25758513	2	24	LOC_Os02g42880	remorin C-terminal domain containing protein, putative, expressed
Leu	6	QTL_02_25758513	2	32	LOC_Os02g42890	cytochrome b561, putative, expressed
Leu	6	QTL_02_25758513	2	38	LOC_Os02g42900	conserved hypothetical protein
Leu	6	QTL_02_25758513	2	41	LOC_Os02g42910	expressed protein
Leu	6	QTL_02_25758513	2	51	LOC_Os02g42920	DTA2, putative, expressed
Leu	6	QTL_02_25758513	2	59	LOC_Os02g42930	conserved hypothetical protein
Leu	6	QTL_02_25758513	2	63	LOC_Os02g42940	MSP domain containing protein, expressed
Leu	6	QTL_02_25758513	2	74	LOC_Os02g42950	YABBY domain containing protein, putative, expressed
Leu	6	QTL_02_25758513	2	91	LOC_Os02g42960	thylakoid lumenal protein, putative, expressed
Leu	6	QTL_02_25758513	2	95	LOC_Os02g42970	NAC domain containing protein, putative
Leu	6	QTL_02_25758513	2	107	LOC_Os02g42980	transposon protein, putative, unclassified
Leu	6	QTL_02_25758513	2	114	LOC_Os02g42990	OsSAUR11 - Auxin-responsive SAUR gene family member, expressed
Leu	7	QTL_02_33500728	2	-113	LOC_Os02g54510	protein kinase domain containing protein, expressed
Leu	7	QTL_02_33500728	2	-103	LOC_Os02g54520	MYB family transcription factor, putative, expressed
Leu	7	QTL_02_33500728	2	-100	LOC_Os02g54530	SCP-like extracellular protein, expressed
Leu	7	QTL_02_33500728	2	-98	LOC_Os02g54540	SCP-like extracellular protein
Leu	7	QTL_02_33500728	2	-92	LOC_Os02g54550	OsFBX63 - F-box domain containing protein
Leu	7	QTL_02_33500728	2	-80	LOC_Os02g54560	SCP-like extracellular protein, expressed
Leu	7	QTL_02_33500728	2	-78	LOC_Os02g54570	SCP-like extracellular protein, expressed
Leu	7	QTL_02_33500728	2	-72	LOC_Os02g54580	serine esterase family protein, putative, expressed
Leu	7	QTL_02_33500728	2	-67	LOC_Os02g54590	serine threonine kinase, putative, expressed
Leu	7	QTL_02_33500728	2	-62	LOC_Os02g54600	STE_MEK_ste7_MAP2K.5 - STE kinases include homologs to sterile 7, sterile 11 and sterile 20 from yeast, expressed
Leu	7	QTL_02_33500728	2	-52	LOC_Os02g54610	hypothetical protein
Leu	7	QTL_02_33500728	2	-45	LOC_Os02g54624	zinc finger family protein, putative, expressed
Leu	7	QTL_02_33500728	2	-30	LOC_Os02g54640	glutamate receptor, putative, expressed
Leu	7	QTL_02_33500728	2	-22	LOC_Os02g54650	diacylglycerol kinase, putative, expressed
Leu	7	QTL_02_33500728	2	-18	LOC_Os02g54670	hypothetical protein
Leu	7	QTL_02_33500728	2	-17	LOC_Os02g54680	conserved hypothetical protein
Leu	7	QTL_02_33500728	2	-13	LOC_Os02g54690	RNA recognition motif containing protein, putative, expressed
Leu	7	QTL_02_33500728	2	-10	LOC_Os02g54700	RNA recognition motif containing protein, putative, expressed
Leu	7	QTL_02_33500728	2	-8	LOC_Os02g54710	expressed protein
Leu	7	QTL_02_33500728	2	0	LOC_Os02g54720	expressed protein
Leu	7	QTL_02_33500728	2	5	LOC_Os02g54730	transmembrane amino acid transporter protein, putative, expressed
Leu	7	QTL_02_33500728	2	11	LOC_Os02g54740	retrotransposon protein, putative, unclassified
Leu	7	QTL_02_33500728	2	19	LOC_Os02g54750	retrotransposon protein, putative, unclassified
Leu	7	QTL_02_33500728	2	23	LOC_Os02g54760	cyclic nucleotide-gated ion channel 14, putative, expressed
Leu	7	QTL_02_33500728	2	35	LOC_Os02g54770	RNA recognition motif containing protein, expressed
Leu	7	QTL_02_33500728	2	40	LOC_Os02g54780	CYPRO4, putative, expressed
Leu	7	QTL_02_33500728	2	45	LOC_Os02g54790	hypothetical protein
Leu	7	QTL_02_33500728	2	55	LOC_Os02g54800	hypothetical protein
Leu	7	QTL_02_33500728	2	57	LOC_Os02g54810	hypothetical protein
Leu	7	QTL_02_33500728	2	62	LOC_Os02g54820	trehalose-6-phosphate synthase, putative, expressed
Leu	7	QTL_02_33500728	2	72	LOC_Os02g54830	RING-H2 finger protein, putative, expressed
Leu	7	QTL_02_33500728	2	77	LOC_Os02g54840	hypothetical protein
Leu	7	QTL_02_33500728	2	84	LOC_Os02g54850	hypothetical protein
Leu	7	QTL_02_33500728	2	89	LOC_Os02g54860	ankyrin repeat-rich protein, putative, expressed
Leu	7	QTL_02_33500728	2	97	LOC_Os02g54870	expressed protein
Leu	7	QTL_02_33500728	2	101	LOC_Os02g54880	cytochrome c oxidase subunit, putative
Leu	7	QTL_02_33500728	2	111	LOC_Os02g54890	UDP-glucuronate 4-epimerase, putative, expressed
Leu	8	QTL_04_01468909	4	-116	LOC_Os04g03200	conserved hypothetical protein
Leu	8	QTL_04_01468909	4	-111	LOC_Os04g03210	receptor kinase, putative
Leu	8	QTL_04_01468909	4	-105	LOC_Os04g03220	hypothetical protein
Leu	8	QTL_04_01468909	4	-98	LOC_Os04g03230	retrotransposon protein, putative, unclassified
Leu	8	QTL_04_01468909	4	-93	LOC_Os04g03240	retrotransposon protein, putative, unclassified
Leu	8	QTL_04_01468909	4	-84	LOC_Os04g03250	retrotransposon protein, putative, Ty3-gypsy subclass
Leu	8	QTL_04_01468909	4	-81	LOC_Os04g03260	retrotransposon protein, putative, Ty3-gypsy subclass
Leu	8	QTL_04_01468909	4	-80	LOC_Os04g03270	retrotransposon protein, putative, Ty3-gypsy subclass
Leu	8	QTL_04_01468909	4	-76	LOC_Os04g03280	retrotransposon protein, putative, Ty3-gypsy subclass
Leu	8	QTL_04_01468909	4	-72	LOC_Os04g03290	retrotransposon protein, putative, unclassified
Leu	8	QTL_04_01468909	4	-66	LOC_Os04g03300	retrotransposon protein, putative, unclassified
Leu	8	QTL_04_01468909	4	-63	LOC_Os04g03310	hypothetical protein
Leu	8	QTL_04_01468909	4	-60	LOC_Os04g03320	jacalin-like lectin domain containing protein
Leu	8	QTL_04_01468909	4	-50	LOC_Os04g03330	transposon protein, putative, CACTA, En/Spm sub-class
Leu	8	QTL_04_01468909	4	-39	LOC_Os04g03340	transposon protein, putative, CACTA, En/Spm sub-class
Leu	8	QTL_04_01468909	4	-31	LOC_Os04g03350	transposon protein, putative, CACTA, En/Spm sub-class
Leu	8	QTL_04_01468909	4	-28	LOC_Os04g03360	jacalin-like lectin domain containing protein
Leu	8	QTL_04_01468909	4	-24	LOC_Os04g03370	cysteine-rich receptor-like protein kinase 41 precursor, putative
Leu	8	QTL_04_01468909	4	-20	LOC_Os04g03380	legume lectins beta domain containing protein, putative
Leu	8	QTL_04_01468909	4	-18	LOC_Os04g03390	hypothetical protein
Leu	8	QTL_04_01468909	4	-16	LOC_Os04g03400	transposon protein, putative, CACTA, En/Spm sub-class
Leu	8	QTL_04_01468909	4	-8	LOC_Os04g03410	retrotransposon protein, putative, unclassified
Leu	8	QTL_04_01468909	4	-4	LOC_Os04g03420	retrotransposon protein, putative, unclassified
Leu	8	QTL_04_01468909	4	-1	LOC_Os04g03430	retrotransposon, putative, centromere-specific
Leu	8	QTL_04_01468909	4	4	LOC_Os04g03440	retrotransposon protein, putative, unclassified
Leu	8	QTL_04_01468909	4	11	LOC_Os04g03450	retrotransposon protein, putative, unclassified
Leu	8	QTL_04_01468909	4	21	LOC_Os04g03460	retrotransposon protein, putative, unclassified
Leu	8	QTL_04_01468909	4	25	LOC_Os04g03470	retrotransposon protein, putative, unclassified
Leu	8	QTL_04_01468909	4	32	LOC_Os04g03480	retrotransposon protein, putative, unclassified
Leu	8	QTL_04_01468909	4	34	LOC_Os04g03490	retrotransposon protein, putative, Ty3-gypsy subclass
Leu	8	QTL_04_01468909	4	55	LOC_Os04g03500	hypothetical protein
Leu	8	QTL_04_01468909	4	57	LOC_Os04g03510	hypothetical protein
Leu	8	QTL_04_01468909	4	58	LOC_Os04g03520	expressed protein
Leu	8	QTL_04_01468909	4	61	LOC_Os04g03530	cysteine-rich receptor-like protein kinase 37 precursor, putative
Leu	8	QTL_04_01468909	4	75	LOC_Os04g03550	retrotransposon protein, putative, unclassified
Leu	8	QTL_04_01468909	4	79	LOC_Os04g03560	retrotransposon protein, putative, unclassified
Leu	8	QTL_04_01468909	4	88	LOC_Os04g03579	protein kinase, putative, expressed
Leu	8	QTL_04_01468909	4	100	LOC_Os04g03600	retrotransposon protein, putative, unclassified
Leu	8	QTL_04_01468909	4	103	LOC_Os04g03610	transposon protein, putative, CACTA, En/Spm sub-class
Leu	8	QTL_04_01468909	4	107	LOC_Os04g03620	transposon protein, putative, CACTA, En/Spm sub-class
Leu	9	QTL_04_08365015	4	-114	LOC_Os04g14700	retrotransposon protein, putative, Ty3-gypsy subclass
Leu	9	QTL_04_08365015	4	-100	LOC_Os04g14710	flavin-containing monooxygenase family protein, putative, expressed
Leu	9	QTL_04_08365015	4	-94	LOC_Os04g14730	expressed protein
Leu	9	QTL_04_08365015	4	-93	LOC_Os04g14740	hypothetical protein
Leu	9	QTL_04_08365015	4	-90	LOC_Os04g14750	hypothetical protein
Leu	9	QTL_04_08365015	4	-84	LOC_Os04g14760	phosphoglycerate mutase, putative, expressed
Leu	9	QTL_04_08365015	4	-77	LOC_Os04g14770	retrotransposon protein, putative, unclassified
Leu	9	QTL_04_08365015	4	-73	LOC_Os04g14780	retrotransposon protein, putative, unclassified
Leu	9	QTL_04_08365015	4	-55	LOC_Os04g14790	FAD dependent oxidoreductase domain containing protein, expressed
Leu	9	QTL_04_08365015	4	-48	LOC_Os04g14810	3-5 exonuclease domain-containing protein, putative, expressed
Leu	9	QTL_04_08365015	4	-46	LOC_Os04g14820	hypothetical protein
Leu	9	QTL_04_08365015	4	-36	LOC_Os04g14830	retrotransposon protein, putative, unclassified
Leu	9	QTL_04_08365015	4	-21	LOC_Os04g14840	retrotransposon protein, putative, unclassified
Leu	9	QTL_04_08365015	4	-16	LOC_Os04g14850	retrotransposon protein, putative, Ty3-gypsy subclass
Leu	9	QTL_04_08365015	4	-11	LOC_Os04g14860	retrotransposon protein, putative, unclassified
Leu	9	QTL_04_08365015	4	-2	LOC_Os04g14870	retrotransposon protein, putative, unclassified
Leu	9	QTL_04_08365015	4	-1	LOC_Os04g14880	retrotransposon protein, putative, unclassified
Leu	9	QTL_04_08365015	4	3	LOC_Os04g14890	retrotransposon protein, putative, Ty3-gypsy subclass
Leu	9	QTL_04_08365015	4	13	LOC_Os04g14900	retrotransposon protein, putative, Ty3-gypsy subclass
Leu	9	QTL_04_08365015	4	16	LOC_Os04g14910	retrotransposon protein, putative, Ty3-gypsy subclass
Leu	9	QTL_04_08365015	4	23	LOC_Os04g14920	retrotransposon protein, putative, Ty3-gypsy subclass
Leu	9	QTL_04_08365015	4	26	LOC_Os04g14930	retrotransposon protein, putative, Ty1-copia subclass
Leu	9	QTL_04_08365015	4	29	LOC_Os04g14940	retrotransposon protein, putative, unclassified
Leu	9	QTL_04_08365015	4	33	LOC_Os04g14950	retrotransposon protein, putative, unclassified
Leu	9	QTL_04_08365015	4	37	LOC_Os04g14960	retrotransposon protein, putative, Ty1-copia subclass
Leu	9	QTL_04_08365015	4	39	LOC_Os04g14970	retrotransposon protein, putative, Ty1-copia subclass
Leu	9	QTL_04_08365015	4	46	LOC_Os04g14980	retrotransposon protein, putative, unclassified
Leu	9	QTL_04_08365015	4	52	LOC_Os04g14990	BURP domain containing protein
Leu	9	QTL_04_08365015	4	56	LOC_Os04g15000	hypothetical protein
Leu	9	QTL_04_08365015	4	63	LOC_Os04g15510	retrotransposon protein, putative, unclassified
Leu	9	QTL_04_08365015	4	70	LOC_Os04g15520	retrotransposon protein, putative, unclassified
Leu	9	QTL_04_08365015	4	75	LOC_Os04g15530	retrotransposon protein, putative, Ty1-copia subclass, expressed
Leu	9	QTL_04_08365015	4	84	LOC_Os04g15550	expressed protein
Leu	9	QTL_04_08365015	4	93	LOC_Os04g15560	protein kinase, putative
Leu	9	QTL_04_08365015	4	95	LOC_Os04g15570	retrotransposon protein, putative, unclassified
Leu	9	QTL_04_08365015	4	103	LOC_Os04g15580	serine/threonine-protein kinase receptor precursor, putative, expressed
Leu	9	QTL_04_08365015	4	111	LOC_Os04g15590	hypothetical protein
Leu	9	QTL_04_08365015	4	114	LOC_Os04g15600	receptor kinase, putative, expressed
Leu	10	QTL_04_10197947	4	-108	LOC_Os04g18260	retrotransposon protein, putative, unclassified
Leu	10	QTL_04_10197947	4	-104	LOC_Os04g18280	retrotransposon protein, putative, unclassified
Leu	10	QTL_04_10197947	4	-101	LOC_Os04g18290	retrotransposon protein, putative, unclassified
Leu	10	QTL_04_10197947	4	-99	LOC_Os04g18300	retrotransposon protein, putative, unclassified
Leu	10	QTL_04_10197947	4	-96	LOC_Os04g18310	retrotransposon, putative, centromere-specific
Leu	10	QTL_04_10197947	4	-94	LOC_Os04g18320	retrotransposon protein, putative, Ty3-gypsy subclass
Leu	10	QTL_04_10197947	4	-85	LOC_Os04g18330	retrotransposon protein, putative, Ty3-gypsy subclass
Leu	10	QTL_04_10197947	4	-76	LOC_Os04g18340	retrotransposon protein, putative, Ty3-gypsy subclass
Leu	10	QTL_04_10197947	4	-75	LOC_Os04g18350	retrotransposon protein, putative, unclassified
Leu	10	QTL_04_10197947	4	-69	LOC_Os04g18360	retrotransposon protein, putative, unclassified
Leu	10	QTL_04_10197947	4	-56	LOC_Os04g18380	cytochrome P450, putative, expressed
Leu	10	QTL_04_10197947	4	-49	LOC_Os04g18390	transposon protein, putative, unclassified
Leu	10	QTL_04_10197947	4	-42	LOC_Os04g18400	retrotransposon protein, putative, unclassified
Leu	10	QTL_04_10197947	4	-35	LOC_Os04g18410	retrotransposon protein, putative, unclassified
Leu	10	QTL_04_10197947	4	-31	LOC_Os04g18420	retrotransposon protein, putative, unclassified
Leu	10	QTL_04_10197947	4	-27	LOC_Os04g18430	hypothetical protein
Leu	10	QTL_04_10197947	4	-22	LOC_Os04g18440	retrotransposon protein, putative, unclassified
Leu	10	QTL_04_10197947	4	-18	LOC_Os04g18450	retrotransposon protein, putative, Ty3-gypsy subclass
Leu	10	QTL_04_10197947	4	-7	LOC_Os04g18460	retrotransposon protein, putative, Ty3-gypsy subclass
Leu	10	QTL_04_10197947	4	5	LOC_Os04g18480	retrotransposon protein, putative, Ty3-gypsy subclass
Leu	10	QTL_04_10197947	4	15	LOC_Os04g18490	retrotransposon protein, putative, Ty3-gypsy subclass
Leu	10	QTL_04_10197947	4	18	LOC_Os04g18500	retrotransposon protein, putative, Ty3-gypsy subclass
Leu	10	QTL_04_10197947	4	23	LOC_Os04g18510	retrotransposon protein, putative, unclassified
Leu	10	QTL_04_10197947	4	26	LOC_Os04g18520	retrotransposon protein, putative, Ty3-gypsy subclass
Leu	10	QTL_04_10197947	4	32	LOC_Os04g18530	hypothetical protein
Leu	10	QTL_04_10197947	4	36	LOC_Os04g18540	hAT dimerisation domain containing protein, putative
Leu	10	QTL_04_10197947	4	39	LOC_Os04g18550	hypothetical protein
Leu	10	QTL_04_10197947	4	42	LOC_Os04g18559	retrotransposon protein, putative, unclassified
Leu	10	QTL_04_10197947	4	45	LOC_Os04g18570	retrotransposon protein, putative, unclassified
Leu	10	QTL_04_10197947	4	52	LOC_Os04g18580	transposon protein, putative, CACTA, En/Spm sub-class
Leu	10	QTL_04_10197947	4	60	LOC_Os04g18590	conserved hypothetical protein
Leu	10	QTL_04_10197947	4	67	LOC_Os04g18600	retrotransposon protein, putative, Ty3-gypsy subclass
Leu	10	QTL_04_10197947	4	84	LOC_Os04g18610	retrotransposon protein, putative, Ty3-gypsy subclass
Leu	10	QTL_04_10197947	4	88	LOC_Os04g18620	retrotransposon protein, putative, unclassified
Leu	10	QTL_04_10197947	4	93	LOC_Os04g18630	retrotransposon, putative, centromere-specific
Leu	10	QTL_04_10197947	4	95	LOC_Os04g18640	retrotransposon protein, putative, Ty3-gypsy subclass
Leu	10	QTL_04_10197947	4	109	LOC_Os04g18650	AP2 domain containing protein
Leu	11	QTL_05_23533644	5	-117	LOC_Os05g39950	DUF623 domain containing protein, expressed
Leu	11	QTL_05_23533644	5	-110	LOC_Os05g39960	40S ribosomal protein S26, putative, expressed
Leu	11	QTL_05_23533644	5	-109	LOC_Os05g39970	hypothetical protein
Leu	11	QTL_05_23533644	5	-104	LOC_Os05g39980	expressed protein
Leu	11	QTL_05_23533644	5	-98	LOC_Os05g39990	expansin precursor, putative, expressed
Leu	11	QTL_05_23533644	5	-92	LOC_Os05g40000	expressed protein
Leu	11	QTL_05_23533644	5	-86	LOC_Os05g40010	LTPL17 - Protease inhibitor/seed storage/LTP family protein precursor, expressed
Leu	11	QTL_05_23533644	5	-85	LOC_Os05g40020	RING-H2 finger protein, putative, expressed
Leu	11	QTL_05_23533644	5	-83	LOC_Os05g40030	hypothetical protein
Leu	11	QTL_05_23533644	5	-76	LOC_Os05g40040	expressed protein
Leu	11	QTL_05_23533644	5	-68	LOC_Os05g40050	receptor-like protein kinase 2 precursor, putative, expressed
Leu	11	QTL_05_23533644	5	-65	LOC_Os05g40060	OsWRKY48 - Superfamily of TFs having WRKY and zinc finger domains, expressed
Leu	11	QTL_05_23533644	5	-57	LOC_Os05g40070	WRKY DNA-binding domain containing protein, expressed
Leu	11	QTL_05_23533644	5	-44	LOC_Os05g40080	OsWRKY54 - Superfamily of TFs having WRKY and zinc finger domains
Leu	11	QTL_05_23533644	5	-40	LOC_Os05g40090	transposon protein, putative, unclassified
Leu	11	QTL_05_23533644	5	-37	LOC_Os05g40100	retrotransposon protein, putative, unclassified
Leu	11	QTL_05_23533644	5	-25	LOC_Os05g40110	retrotransposon protein, putative, unclassified
Leu	11	QTL_05_23533644	5	-24	LOC_Os05g40120	hypothetical protein
Leu	11	QTL_05_23533644	5	-22	LOC_Os05g40130	hypothetical protein
Leu	11	QTL_05_23533644	5	-19	LOC_Os05g40140	retrotransposon protein, putative, unclassified
Leu	11	QTL_05_23533644	5	-10	LOC_Os05g40150	RGH2B, putative, expressed
Leu	11	QTL_05_23533644	5	-5	LOC_Os05g40160	NB-ARC domain containing protein, expressed
Leu	11	QTL_05_23533644	5	0	LOC_Os05g40170	expressed protein
Leu	11	QTL_05_23533644	5	1	LOC_Os05g40180	serine/threonine-protein kinase stt7, chloroplast precursor, putative, expressed
Leu	11	QTL_05_23533644	5	4	LOC_Os05g40190	thioredoxin, putative, expressed
Leu	11	QTL_05_23533644	5	9	LOC_Os05g40200	inactive receptor kinase At2g26730 precursor, putative, expressed
Leu	11	QTL_05_23533644	5	21	LOC_Os05g40212	expressed protein
Leu	11	QTL_05_23533644	5	26	LOC_Os05g40220	transposon protein, putative, unclassified, expressed
Leu	11	QTL_05_23533644	5	36	LOC_Os05g40230	vacuolar ATP synthase subunit E, putative, expressed
Leu	11	QTL_05_23533644	5	39	LOC_Os05g40240	expressed protein
Leu	11	QTL_05_23533644	5	43	LOC_Os05g40250	hypothetical protein
Leu	11	QTL_05_23533644	5	46	LOC_Os05g40260	acetyltransferase, GNAT family, putative, expressed
Leu	11	QTL_05_23533644	5	57	LOC_Os05g40270	expressed protein
Leu	11	QTL_05_23533644	5	65	LOC_Os05g40280	B3 DNA binding domain containing protein, expressed
Leu	11	QTL_05_23533644	5	75	LOC_Os05g40285	expressed protein
Leu	11	QTL_05_23533644	5	76	LOC_Os05g40290	KH domain-containing protein, putative, expressed
Leu	11	QTL_05_23533644	5	89	LOC_Os05g40300	expressed protein
Leu	11	QTL_05_23533644	5	92	LOC_Os05g40310	expressed protein
Leu	11	QTL_05_23533644	5	96	LOC_Os05g40320	PPR repeat domain containing protein, putative, expressed
Leu	11	QTL_05_23533644	5	101	LOC_Os05g40330	auxin efflux carrier component, putative, expressed
Leu	11	QTL_05_23533644	5	108	LOC_Os05g40340	hypothetical protein
Leu	11	QTL_05_23533644	5	111	LOC_Os05g40350	hypothetical protein
Leu	11	QTL_05_23533644	5	113	LOC_Os05g40360	hypothetical protein
Leu	12	QTL_09_00239306	9	-119	LOC_Os09g01110	retrotransposon protein, putative, Ty3-gypsy subclass
Leu	12	QTL_09_00239306	9	-111	LOC_Os09g01120	retrotransposon protein, putative, Ty3-gypsy subclass
Leu	12	QTL_09_00239306	9	-104	LOC_Os09g01130	retrotransposon protein, putative, unclassified
Leu	12	QTL_09_00239306	9	-94	LOC_Os09g01134	expressed protein
Leu	12	QTL_09_00239306	9	-87	LOC_Os09g01140	hypothetical protein
Leu	12	QTL_09_00239306	9	-82	LOC_Os09g01150	retrotransposon protein, putative, Ty3-gypsy subclass
Leu	12	QTL_09_00239306	9	-77	LOC_Os09g01160	hypothetical protein
Leu	12	QTL_09_00239306	9	-71	LOC_Os09g01170	retrotransposon protein, putative, Ty3-gypsy subclass
Leu	12	QTL_09_00239306	9	-69	LOC_Os09g01180	retrotransposon protein, putative, unclassified
Leu	12	QTL_09_00239306	9	-61	LOC_Os09g01190	retrotransposon protein, putative, unclassified
Leu	12	QTL_09_00239306	9	-55	LOC_Os09g01200	retrotransposon protein, putative, unclassified
Leu	12	QTL_09_00239306	9	-53	LOC_Os09g01210	retrotransposon protein, putative, unclassified
Leu	12	QTL_09_00239306	9	-47	LOC_Os09g01220	retrotransposon protein, putative, Ty3-gypsy subclass
Leu	12	QTL_09_00239306	9	-42	LOC_Os09g01230	retrotransposon protein, putative, Ty3-gypsy subclass
Leu	12	QTL_09_00239306	9	-37	LOC_Os09g01240	retrotransposon protein, putative, Ty3-gypsy subclass
Leu	12	QTL_09_00239306	9	-23	LOC_Os09g01250	retrotransposon protein, putative, Ty3-gypsy subclass
Leu	12	QTL_09_00239306	9	-15	LOC_Os09g01260	retrotransposon protein, putative, Ty3-gypsy subclass
Leu	12	QTL_09_00239306	9	-4	LOC_Os09g01270	retrotransposon protein, putative, Ty3-gypsy subclass
Leu	12	QTL_09_00239306	9	4	LOC_Os09g01290	hhH-GPD superfamily base excision DNA repair protein, putative, expressed
Leu	12	QTL_09_00239306	9	10	LOC_Os09g01300	transposon protein, putative, unclassified
Leu	12	QTL_09_00239306	9	19	LOC_Os09g01310	hypothetical protein
Leu	12	QTL_09_00239306	9	25	LOC_Os09g01320	expressed protein
Leu	12	QTL_09_00239306	9	28	LOC_Os09g01330	hypothetical protein
Leu	12	QTL_09_00239306	9	32	LOC_Os09g01340	retrotransposon protein, putative, Ty3-gypsy subclass
Leu	12	QTL_09_00239306	9	38	LOC_Os09g01350	retrotransposon protein, putative, unclassified
Leu	12	QTL_09_00239306	9	45	LOC_Os09g01360	expressed protein
Leu	12	QTL_09_00239306	9	65	LOC_Os09g01370	transposon protein, putative, unclassified
Leu	12	QTL_09_00239306	9	69	LOC_Os09g01375	retrotransposon protein, putative, unclassified
Leu	12	QTL_09_00239306	9	69	LOC_Os09g01380	conserved hypothetical protein
Leu	12	QTL_09_00239306	9	70	LOC_Os09g01390	retrotransposon protein, putative, unclassified
Leu	12	QTL_09_00239306	9	76	LOC_Os09g01400	retrotransposon protein, putative, unclassified
Leu	12	QTL_09_00239306	9	79	LOC_Os09g01410	retrotransposon protein, putative, unclassified
Leu	12	QTL_09_00239306	9	83	LOC_Os09g01420	hypothetical protein
Leu	12	QTL_09_00239306	9	85	LOC_Os09g01430	retrotransposon protein, putative, unclassified
Leu	12	QTL_09_00239306	9	91	LOC_Os09g01440	hypothetical protein
Leu	12	QTL_09_00239306	9	94	LOC_Os09g01450	retrotransposon protein, putative, Ty3-gypsy subclass
Leu	12	QTL_09_00239306	9	99	LOC_Os09g01460	retrotransposon protein, putative, Ty3-gypsy subclass
Leu	12	QTL_09_00239306	9	104	LOC_Os09g01470	expressed protein
Leu	12	QTL_09_00239306	9	107	LOC_Os09g01480	retrotransposon protein, putative, unclassified
Leu	12	QTL_09_00239306	9	119	LOC_Os09g01490	retrotransposon protein, putative, unclassified
Leu	13	QTL_10_05473583	10	-110	LOC_Os10g09870	HVA22, putative, expressed
Leu	13	QTL_10_05473583	10	-104	LOC_Os10g09880	retrotransposon protein, putative, unclassified
Leu	13	QTL_10_05473583	10	-95	LOC_Os10g09890	hypothetical protein
Leu	13	QTL_10_05473583	10	-91	LOC_Os10g09900	transposon protein, putative, unclassified
Leu	13	QTL_10_05473583	10	-90	LOC_Os10g09910	hypothetical protein
Leu	13	QTL_10_05473583	10	-87	LOC_Os10g09920	LTPL132 - Protease inhibitor/seed storage/LTP family protein precursor, putative, expressed
Leu	13	QTL_10_05473583	10	-76	LOC_Os10g09930	expressed protein
Leu	13	QTL_10_05473583	10	-67	LOC_Os10g09940	retrotransposon protein, putative, Ty1-copia subclass
Leu	13	QTL_10_05473583	10	-59	LOC_Os10g09950	retrotransposon protein, putative, Ty3-gypsy subclass
Leu	13	QTL_10_05473583	10	-55	LOC_Os10g09960	retrotransposon protein, putative, unclassified, expressed
Leu	13	QTL_10_05473583	10	-46	LOC_Os10g09970	retrotransposon protein, putative, Ty3-gypsy subclass
Leu	13	QTL_10_05473583	10	-42	LOC_Os10g09990	cytokinin-O-glucosyltransferase 3, putative, expressed
Leu	13	QTL_10_05473583	10	-29	LOC_Os10g10000	hypothetical protein
Leu	13	QTL_10_05473583	10	-27	LOC_Os10g10010	hypothetical protein
Leu	13	QTL_10_05473583	10	-19	LOC_Os10g10020	hypothetical protein
Leu	13	QTL_10_05473583	10	-7	LOC_Os10g10030	OsWAK111 - OsWAK receptor-like protein kinase, expressed
Leu	13	QTL_10_05473583	10	4	LOC_Os10g10040	cytochrome P450, putative
Leu	13	QTL_10_05473583	10	12	LOC_Os10g10050	expressed protein
Leu	13	QTL_10_05473583	10	13	LOC_Os10g10060	conserved hypothetical protein
Leu	13	QTL_10_05473583	10	29	LOC_Os10g10080	exostosin family domain containing protein, expressed
Leu	13	QTL_10_05473583	10	54	LOC_Os10g10090	hypothetical protein
Leu	13	QTL_10_05473583	10	57	LOC_Os10g10100	retrotransposon protein, putative, Ty3-gypsy subclass
Leu	13	QTL_10_05473583	10	64	LOC_Os10g10110	retrotransposon protein, putative, Ty3-gypsy subclass
Leu	13	QTL_10_05473583	10	80	LOC_Os10g10130	OsWAK112d - OsWAK receptor-like protein kinase, expressed
Leu	13	QTL_10_05473583	10	101	LOC_Os10g10140	hypothetical protein
Leu	13	QTL_10_05473583	10	111	LOC_Os10g10149	expressed protein
Leu	13	QTL_10_05473583	10	113	LOC_Os10g10160	hypothetical protein
Leu	14	QTL_10_05632537	10	-104	LOC_Os10g10090	hypothetical protein
Leu	14	QTL_10_05632537	10	-95	LOC_Os10g10100	retrotransposon protein, putative, Ty3-gypsy subclass
Leu	14	QTL_10_05632537	10	-91	LOC_Os10g10110	retrotransposon protein, putative, Ty3-gypsy subclass
Leu	14	QTL_10_05632537	10	-71	LOC_Os10g10130	OsWAK112d - OsWAK receptor-like protein kinase, expressed
Leu	14	QTL_10_05632537	10	-52	LOC_Os10g10140	hypothetical protein
Leu	14	QTL_10_05632537	10	-46	LOC_Os10g10149	expressed protein
Leu	14	QTL_10_05632537	10	-41	LOC_Os10g10160	hypothetical protein
Leu	14	QTL_10_05632537	10	-30	LOC_Os10g10170	PPR repeat domain containing protein, putative, expressed
Leu	14	QTL_10_05632537	10	-29	LOC_Os10g10175	expressed protein
Leu	14	QTL_10_05632537	10	-20	LOC_Os10g10180	methyltransferase domain containing protein, putative, expressed
Leu	14	QTL_10_05632537	10	-5	LOC_Os10g10190	ATP-binding region, ATPase-like domain containing protein, expressed
Leu	14	QTL_10_05632537	10	2	LOC_Os10g10214	retrotransposon protein, putative, unclassified
Leu	14	QTL_10_05632537	10	10	LOC_Os10g10230	retrotransposon protein, putative, unclassified
Leu	14	QTL_10_05632537	10	16	LOC_Os10g10244	alanyl-tRNA synthetase, putative, expressed
Leu	14	QTL_10_05632537	10	28	LOC_Os10g10260	expressed protein
Leu	14	QTL_10_05632537	10	30	LOC_Os10g10270	conserved hypothetical protein
Leu	14	QTL_10_05632537	10	31	LOC_Os10g10280	hypothetical protein
Leu	14	QTL_10_05632537	10	38	LOC_Os10g10290	retrotransposon protein, putative, unclassified
Leu	14	QTL_10_05632537	10	41	LOC_Os10g10300	retrotransposon protein, putative, unclassified, expressed
Leu	14	QTL_10_05632537	10	48	LOC_Os10g10310	conserved hypothetical protein
Leu	14	QTL_10_05632537	10	54	LOC_Os10g10320	conserved hypothetical protein
Leu	14	QTL_10_05632537	10	60	LOC_Os10g10334	conserved hypothetical protein
Leu	14	QTL_10_05632537	10	67	LOC_Os10g10350	retrotransposon protein, putative, unclassified
Leu	14	QTL_10_05632537	10	77	LOC_Os10g10360	NBS-LRR disease resistance protein, putative, expressed
Leu	14	QTL_10_05632537	10	84	LOC_Os10g10370	hypothetical protein
Leu	14	QTL_10_05632537	10	88	LOC_Os10g10380	retrotransposon protein, putative, unclassified
Leu	14	QTL_10_05632537	10	94	LOC_Os10g10390	OsFBX376 - F-box domain containing protein
Leu	14	QTL_10_05632537	10	98	LOC_Os10g10400	hypothetical protein
Leu	14	QTL_10_05632537	10	101	LOC_Os10g10410	OsFBX377 - F-box domain containing protein
Leu	14	QTL_10_05632537	10	104	LOC_Os10g10420	OsFBX378 - F-box domain containing protein
Leu	14	QTL_10_05632537	10	114	LOC_Os10g10434	dimethyladenosine transferase, putative, expressed
Leu	15	QTL_12_08631432	12	-119	LOC_Os12g14870	hypothetical protein
Leu	15	QTL_12_08631432	12	-117	LOC_Os12g14880	retrotransposon protein, putative, unclassified
Leu	15	QTL_12_08631432	12	-113	LOC_Os12g14890	retrotransposon protein, putative, unclassified
Leu	15	QTL_12_08631432	12	-107	LOC_Os12g14900	retrotransposon protein, putative, unclassified
Leu	15	QTL_12_08631432	12	-102	LOC_Os12g14910	hypothetical protein
Leu	15	QTL_12_08631432	12	-95	LOC_Os12g14920	transposon protein, putative, unclassified
Leu	15	QTL_12_08631432	12	-92	LOC_Os12g14930	ATP synthase protein MI25, putative, expressed
Leu	15	QTL_12_08631432	12	-89	LOC_Os12g14939	conserved hypothetical protein
Leu	15	QTL_12_08631432	12	-71	LOC_Os12g14960	retrotransposon, putative, centromere-specific
Leu	15	QTL_12_08631432	12	-62	LOC_Os12g14984	retrotransposon protein, putative, unclassified
Leu	15	QTL_12_08631432	12	-60	LOC_Os12g15000	retrotransposon protein, putative, Ty1-copia subclass
Leu	15	QTL_12_08631432	12	-56	LOC_Os12g15010	retrotransposon protein, putative, Ty1-copia subclass
Leu	15	QTL_12_08631432	12	-49	LOC_Os12g15020	retrotransposon protein, putative, Ty3-gypsy subclass
Leu	15	QTL_12_08631432	12	-45	LOC_Os12g15030	retrotransposon protein, putative, Ty3-gypsy subclass
Leu	15	QTL_12_08631432	12	-42	LOC_Os12g15040	retrotransposon protein, putative, Ty3-gypsy subclass
Leu	15	QTL_12_08631432	12	-40	LOC_Os12g15050	retrotransposon protein, putative, Ty3-gypsy subclass
Leu	15	QTL_12_08631432	12	-32	LOC_Os12g15060	retrotransposon protein, putative, Ty3-gypsy subclass
Leu	15	QTL_12_08631432	12	-29	LOC_Os12g15070	retrotransposon protein, putative, Ty3-gypsy subclass
Leu	15	QTL_12_08631432	12	-27	LOC_Os12g15080	retrotransposon protein, putative, Ty3-gypsy subclass
Leu	15	QTL_12_08631432	12	-22	LOC_Os12g15090	retrotransposon protein, putative, unclassified
Leu	15	QTL_12_08631432	12	-15	LOC_Os12g15100	retrotransposon protein, putative, Ty3-gypsy subclass
Leu	15	QTL_12_08631432	12	-9	LOC_Os12g15110	retrotransposon protein, putative, unclassified
Leu	15	QTL_12_08631432	12	-4	LOC_Os12g15120	retrotransposon protein, putative, unclassified
Leu	15	QTL_12_08631432	12	-1	LOC_Os12g15130	retrotransposon protein, putative, unclassified
Leu	15	QTL_12_08631432	12	8	LOC_Os12g15150	retrotransposon protein, putative, Ty3-gypsy subclass
Leu	15	QTL_12_08631432	12	11	LOC_Os12g15160	retrotransposon protein, putative, Ty3-gypsy subclass
Leu	15	QTL_12_08631432	12	15	LOC_Os12g15170	hypothetical protein
Leu	15	QTL_12_08631432	12	17	LOC_Os12g15180	hypothetical protein
Leu	15	QTL_12_08631432	12	27	LOC_Os12g15190	conserved hypothetical protein
Leu	15	QTL_12_08631432	12	36	LOC_Os12g15222	expressed protein
Leu	15	QTL_12_08631432	12	53	LOC_Os12g15240	hypothetical protein
Leu	15	QTL_12_08631432	12	56	LOC_Os12g15250	hypothetical protein
Leu	15	QTL_12_08631432	12	67	LOC_Os12g15260	hypothetical protein
Leu	15	QTL_12_08631432	12	76	LOC_Os12g15270	expressed protein
Leu	15	QTL_12_08631432	12	81	LOC_Os12g15280	retrotransposon protein, putative, Ty1-copia subclass
Leu	15	QTL_12_08631432	12	84	LOC_Os12g15290	retrotransposon protein, putative, Ty1-copia subclass
Leu	15	QTL_12_08631432	12	89	LOC_Os12g15300	retrotransposon protein, putative, Ty1-copia subclass
Leu	15	QTL_12_08631432	12	91	LOC_Os12g15314	staphylococcal nuclease homologue, putative, expressed
Leu	15	QTL_12_08631432	12	108	LOC_Os12g15330	retrotransposon protein, putative, unclassified
Leu	16	QTL_12_14378056	12	-119	LOC_Os12g24870	SWIM zinc finger family protein, putative
Leu	16	QTL_12_14378056	12	-115	LOC_Os12g24880	retrotransposon protein, putative, unclassified
Leu	16	QTL_12_14378056	12	-100	LOC_Os12g24890	retrotransposon protein, putative, Ty3-gypsy subclass
Leu	16	QTL_12_14378056	12	-98	LOC_Os12g24900	hypothetical protein
Leu	16	QTL_12_14378056	12	-79	LOC_Os12g24910	retrotransposon protein, putative, Ty3-gypsy subclass
Leu	16	QTL_12_14378056	12	-66	LOC_Os12g24920	retrotransposon, putative, centromere-specific
Leu	16	QTL_12_14378056	12	-59	LOC_Os12g24930	retrotransposon protein, putative, Ty3-gypsy subclass
Leu	16	QTL_12_14378056	12	-56	LOC_Os12g24940	retrotransposon protein, putative, unclassified
Leu	16	QTL_12_14378056	12	-53	LOC_Os12g24950	retrotransposon protein, putative, Ty3-gypsy subclass
Leu	16	QTL_12_14378056	12	-49	LOC_Os12g24960	retrotransposon protein, putative, Ty3-gypsy subclass
Leu	16	QTL_12_14378056	12	-45	LOC_Os12g24970	retrotransposon protein, putative, Ty3-gypsy subclass
Leu	16	QTL_12_14378056	12	-39	LOC_Os12g24980	hypothetical protein
Leu	16	QTL_12_14378056	12	-33	LOC_Os12g24990	retrotransposon protein, putative, Ty3-gypsy subclass
Leu	16	QTL_12_14378056	12	-24	LOC_Os12g25000	transposon protein, putative, CACTA, En/Spm sub-class
Leu	16	QTL_12_14378056	12	-23	LOC_Os12g25010	transposon protein, putative, CACTA, En/Spm sub-class
Leu	16	QTL_12_14378056	12	-20	LOC_Os12g25020	transposon protein, putative, CACTA, En/Spm sub-class
Leu	16	QTL_12_14378056	12	-18	LOC_Os12g25030	hypothetical protein
Leu	16	QTL_12_14378056	12	-6	LOC_Os12g25040	retrotransposon protein, putative, unclassified
Leu	16	QTL_12_14378056	12	20	LOC_Os12g25070	retrotransposon protein, putative, unclassified
Leu	16	QTL_12_14378056	12	25	LOC_Os12g25080	retrotransposon protein, putative, Ty1-copia subclass
Leu	16	QTL_12_14378056	12	30	LOC_Os12g25090	expressed protein
Leu	16	QTL_12_14378056	12	34	LOC_Os12g25100	retrotransposon protein, putative, Ty1-copia subclass
Leu	16	QTL_12_14378056	12	39	LOC_Os12g25110	hypothetical protein
Leu	16	QTL_12_14378056	12	42	LOC_Os12g25120	core histone H2A/H2B/H3/H4, putative, expressed
Leu	16	QTL_12_14378056	12	52	LOC_Os12g25130	CRP8 - Cysteine-rich family protein precursor, expressed
Leu	16	QTL_12_14378056	12	54	LOC_Os12g25140	hypothetical protein
Leu	16	QTL_12_14378056	12	57	LOC_Os12g25150	retrotransposon protein, putative, Ty3-gypsy subclass
Leu	16	QTL_12_14378056	12	67	LOC_Os12g25160	MATE, putative
Leu	16	QTL_12_14378056	12	69	LOC_Os12g25170	NB-ARC domain containing disease resistance protein, putative, expressed
Leu	16	QTL_12_14378056	12	72	LOC_Os12g25180	expressed protein
Leu	16	QTL_12_14378056	12	91	LOC_Os12g25190	retrotransposon protein, putative, Ty1-copia subclass
Leu	16	QTL_12_14378056	12	106	LOC_Os12g25200	chloride transporter, chloride channel family, putative, expressed
Ile	1	QTL_01_07646091	1	-116	LOC_Os01g13500	hypothetical protein
Ile	1	QTL_01_07646091	1	-102	LOC_Os01g13510	hypothetical protein
Ile	1	QTL_01_07646091	1	-95	LOC_Os01g13520	auxin response factor 1, putative, expressed
Ile	1	QTL_01_07646091	1	-86	LOC_Os01g13530	ABIL2, putative, expressed
Ile	1	QTL_01_07646091	1	-70	LOC_Os01g13540	NIN, putative, expressed
Ile	1	QTL_01_07646091	1	-64	LOC_Os01g13550	beta-amylase, putative, expressed
Ile	1	QTL_01_07646091	1	-57	LOC_Os01g13560	membrane associated DUF588 domain containing protein, putative, expressed
Ile	1	QTL_01_07646091	1	-54	LOC_Os01g13570	phosphoglycerate mutase, putative, expressed
Ile	1	QTL_01_07646091	1	-43	LOC_Os01g13590	isoflavone reductase homolog IRL, putative
Ile	1	QTL_01_07646091	1	-40	LOC_Os01g13600	nmrA-like family domain containing protein
Ile	1	QTL_01_07646091	1	-22	LOC_Os01g13610	isoflavone reductase homolog IRL, putative, expressed
Ile	1	QTL_01_07646091	1	-6	LOC_Os01g13620	retrotransposon protein, putative, unclassified
Ile	1	QTL_01_07646091	1	-3	LOC_Os01g13630	retrotransposon protein, putative, unclassified
Ile	1	QTL_01_07646091	1	1	LOC_Os01g13640	retrotransposon, putative, centromere-specific
Ile	1	QTL_01_07646091	1	3	LOC_Os01g13650	retrotransposon protein, putative, unclassified
Ile	1	QTL_01_07646091	1	5	LOC_Os01g13660	expressed protein
Ile	1	QTL_01_07646091	1	10	LOC_Os01g13670	conserved hypothetical protein
Ile	1	QTL_01_07646091	1	13	LOC_Os01g13680	hypothetical protein
Ile	1	QTL_01_07646091	1	18	LOC_Os01g13690	ligA, putative, expressed
Ile	1	QTL_01_07646091	1	22	LOC_Os01g13700	DNA-binding protein-related, putative, expressed
Ile	1	QTL_01_07646091	1	25	LOC_Os01g13710	transposon protein, putative, unclassified, expressed
Ile	1	QTL_01_07646091	1	30	LOC_Os01g13720	expressed protein
Ile	1	QTL_01_07646091	1	31	LOC_Os01g13730	WD domain, G-beta repeat domain containing protein, expressed
Ile	1	QTL_01_07646091	1	39	LOC_Os01g13740	myb-like DNA-binding domain containing protein, expressed
Ile	1	QTL_01_07646091	1	65	LOC_Os01g13760	dnaJ domain containing protein, expressed
Ile	1	QTL_01_07646091	1	71	LOC_Os01g13770	DUF250 domain containing protein, putative, expressed
Ile	1	QTL_01_07646091	1	77	LOC_Os01g13780	expressed protein
Ile	1	QTL_01_07646091	1	91	LOC_Os01g13800	receptor-like protein kinase 5 precursor, putative, expressed
Ile	1	QTL_01_07646091	1	97	LOC_Os01g13810	expressed protein
Ile	1	QTL_01_07646091	1	102	LOC_Os01g13820	retrotransposon protein, putative, unclassified
Ile	1	QTL_01_07646091	1	108	LOC_Os01g13830	expressed protein
Ile	1	QTL_01_07646091	1	117	LOC_Os01g13840	PE-PGRS family protein, putative
Ile	1	QTL_01_07646091	1	119	LOC_Os01g13850	hypothetical protein
Ile	2	QTL_01_10944343	1	-113	LOC_Os01g19170	polygalacturonase, putative, expressed
Ile	2	QTL_01_10944343	1	-107	LOC_Os01g19180	hypothetical protein
Ile	2	QTL_01_10944343	1	-85	LOC_Os01g19190	retrotransposon protein, putative, unclassified
Ile	2	QTL_01_10944343	1	-82	LOC_Os01g19200	retrotransposon protein, putative, unclassified
Ile	2	QTL_01_10944343	1	-78	LOC_Os01g19210	transposon protein, putative, unclassified
Ile	2	QTL_01_10944343	1	-71	LOC_Os01g19220	beta-D-xylosidase, putative, expressed
Ile	2	QTL_01_10944343	1	-69	LOC_Os01g19230	conserved hypothetical protein
Ile	2	QTL_01_10944343	1	-63	LOC_Os01g19240	integral membrane protein DUF6 containing protein
Ile	2	QTL_01_10944343	1	-59	LOC_Os01g19250	hypothetical protein
Ile	2	QTL_01_10944343	1	-51	LOC_Os01g19260	ATPase, putative, expressed
Ile	2	QTL_01_10944343	1	-47	LOC_Os01g19270	expressed protein
Ile	2	QTL_01_10944343	1	-44	LOC_Os01g19280	expressed protein
Ile	2	QTL_01_10944343	1	-30	LOC_Os01g19290	integral membrane protein DUF6 containing protein, expressed
Ile	2	QTL_01_10944343	1	-22	LOC_Os01g19300	retrotransposon protein, putative, unclassified
Ile	2	QTL_01_10944343	1	-16	LOC_Os01g19310	retrotransposon protein, putative, unclassified
Ile	2	QTL_01_10944343	1	-12	LOC_Os01g19320	hypothetical protein
Ile	2	QTL_01_10944343	1	-9	LOC_Os01g19330	MYB family transcription factor, putative, expressed
Ile	2	QTL_01_10944343	1	5	LOC_Os01g19350	hypothetical protein
Ile	2	QTL_01_10944343	1	7	LOC_Os01g19360	retrotransposon protein, putative, Ty1-copia subclass
Ile	2	QTL_01_10944343	1	15	LOC_Os01g19370	retrotransposon protein, putative, unclassified
Ile	2	QTL_01_10944343	1	19	LOC_Os01g19380	pentatricopeptide, putative
Ile	2	QTL_01_10944343	1	23	LOC_Os01g19390	glycerol-3-phosphate acyltransferase, putative
Ile	2	QTL_01_10944343	1	31	LOC_Os01g19400	expressed protein
Ile	2	QTL_01_10944343	1	35	LOC_Os01g19410	expressed protein
Ile	2	QTL_01_10944343	1	40	LOC_Os01g19420	transposon protein, putative, unclassified, expressed
Ile	2	QTL_01_10944343	1	45	LOC_Os01g19430	3-5 exonuclease domain-containing protein, putative, expressed
Ile	2	QTL_01_10944343	1	52	LOC_Os01g19440	pectinesterase, putative
Ile	2	QTL_01_10944343	1	53	LOC_Os01g19450	ATP-citrate synthase subunit 1, putative, expressed
Ile	2	QTL_01_10944343	1	68	LOC_Os01g19460	retrotransposon protein, putative, unclassified
Ile	2	QTL_01_10944343	1	80	LOC_Os01g19470	nodal modulator 1 precursor, putative, expressed
Ile	2	QTL_01_10944343	1	113	LOC_Os01g19480	kelch motif family protein, putative, expressed
Ile	3	QTL_01_23419417	1	-117	LOC_Os01g41160	FAD dependent oxidoreductase domain containing protein, expressed
Ile	3	QTL_01_23419417	1	-107	LOC_Os01g41170	THION27 - Plant thionin family protein precursor, expressed
Ile	3	QTL_01_23419417	1	-106	LOC_Os01g41180	THION19 - Plant thionin family protein precursor, putative, expressed
Ile	3	QTL_01_23419417	1	-97	LOC_Os01g41190	glycine-rich protein, putative, expressed
Ile	3	QTL_01_23419417	1	-95	LOC_Os01g41200	heavy metal-associated domain containing protein, expressed
Ile	3	QTL_01_23419417	1	-88	LOC_Os01g41210	transposon protein, putative, unclassified, expressed
Ile	3	QTL_01_23419417	1	-82	LOC_Os01g41220	DUF538 domain containing protein, putative, expressed
Ile	3	QTL_01_23419417	1	-81	LOC_Os01g41230	hypothetical protein
Ile	3	QTL_01_23419417	1	-75	LOC_Os01g41240	hydrolase, alpha/beta fold family domain containing protein, expressed
Ile	3	QTL_01_23419417	1	-71	LOC_Os01g41250	OsFBX17 - F-box domain containing protein, expressed
Ile	3	QTL_01_23419417	1	-66	LOC_Os01g41260	OsFBD2 - F-box and FBD domain containing protein
Ile	3	QTL_01_23419417	1	-60	LOC_Os01g41270	OsFBD3 - F-box and FBD domain containing protein, expressed
Ile	3	QTL_01_23419417	1	-58	LOC_Os01g41280	OsFBD4 - F-box and FBD domain containing protein, expressed
Ile	3	QTL_01_23419417	1	-54	LOC_Os01g41290	OsFBD5 - F-box and FBD domain containing protein, expressed
Ile	3	QTL_01_23419417	1	-52	LOC_Os01g41300	hypothetical protein
Ile	3	QTL_01_23419417	1	-41	LOC_Os01g41310	OsFBX18 - F-box domain containing protein, expressed
Ile	3	QTL_01_23419417	1	-35	LOC_Os01g41320	hypothetical protein
Ile	3	QTL_01_23419417	1	-32	LOC_Os01g41330	hypothetical protein
Ile	3	QTL_01_23419417	1	-25	LOC_Os01g41340	OsFBL1 - F-box domain and LRR containing protein
Ile	3	QTL_01_23419417	1	-19	LOC_Os01g41350	hypothetical protein
Ile	3	QTL_01_23419417	1	-16	LOC_Os01g41360	expressed protein
Ile	3	QTL_01_23419417	1	-9	LOC_Os01g41370	FBD domain containing protein, putative, expressed
Ile	3	QTL_01_23419417	1	3	LOC_Os01g41390	retrotransposon, putative, centromere-specific
Ile	3	QTL_01_23419417	1	19	LOC_Os01g41400	transmembrane amino acid transporter protein, putative, expressed
Ile	3	QTL_01_23419417	1	21	LOC_Os01g41410	hypothetical protein
Ile	3	QTL_01_23419417	1	26	LOC_Os01g41420	transmembrane amino acid transporter protein, putative, expressed
Ile	3	QTL_01_23419417	1	35	LOC_Os01g41430	UDP-glucoronosyl and UDP-glucosyl transferase, putative, expressed
Ile	3	QTL_01_23419417	1	40	LOC_Os01g41440	retrotransposon protein, putative, unclassified
Ile	3	QTL_01_23419417	1	43	LOC_Os01g41450	UDP-glucoronosyl and UDP-glucosyl transferase domain containing protein
Ile	3	QTL_01_23419417	1	51	LOC_Os01g41460	retrotransposon protein, putative, Ty3-gypsy subclass
Ile	3	QTL_01_23419417	1	58	LOC_Os01g41470	retrotransposon protein, putative, Ty3-gypsy subclass
Ile	3	QTL_01_23419417	1	61	LOC_Os01g41480	retrotransposon protein, putative, Ty3-gypsy subclass
Ile	3	QTL_01_23419417	1	64	LOC_Os01g41490	retrotransposon protein, putative, Ty3-gypsy subclass
Ile	3	QTL_01_23419417	1	67	LOC_Os01g41500	retrotransposon protein, putative, unclassified
Ile	3	QTL_01_23419417	1	77	LOC_Os01g41510	calcineurin B, putative, expressed
Ile	3	QTL_01_23419417	1	83	LOC_Os01g41516	retrotransposon protein, putative, Ty1-copia subclass
Ile	3	QTL_01_23419417	1	86	LOC_Os01g41522	retrotransposon protein, putative, unclassified
Ile	3	QTL_01_23419417	1	89	LOC_Os01g41530	OsFBL2 - F-box domain and LRR containing protein, expressed
Ile	3	QTL_01_23419417	1	92	LOC_Os01g41540	hypothetical protein
Ile	3	QTL_01_23419417	1	94	LOC_Os01g41550	aspartic proteinase, putative, expressed
Ile	3	QTL_01_23419417	1	101	LOC_Os01g41560	hypothetical protein
Ile	3	QTL_01_23419417	1	109	LOC_Os01g41565	ATP-binding domain-containing protein, putative
Ile	4	QTL_02_23416746	2	-118	LOC_Os02g38540	retrotransposon protein, putative, Ty3-gypsy subclass
Ile	4	QTL_02_23416746	2	-113	LOC_Os02g38550	retrotransposon protein, putative, Ty3-gypsy subclass
Ile	4	QTL_02_23416746	2	-109	LOC_Os02g38560	retrotransposon protein, putative, unclassified
Ile	4	QTL_02_23416746	2	-106	LOC_Os02g38570	retrotransposon protein, putative, unclassified
Ile	4	QTL_02_23416746	2	-98	LOC_Os02g38572	EMB2423, putative, expressed
Ile	4	QTL_02_23416746	2	-96	LOC_Os02g38574	EMB2423, putative
Ile	4	QTL_02_23416746	2	-90	LOC_Os02g38580	protein phosphatase 2C, putative, expressed
Ile	4	QTL_02_23416746	2	-88	LOC_Os02g38589	OsFBX55 - F-box domain containing protein, expressed
Ile	4	QTL_02_23416746	2	-87	LOC_Os02g38598	expressed protein
Ile	4	QTL_02_23416746	2	-84	LOC_Os02g38610	retrotransposon protein, putative, unclassified
Ile	4	QTL_02_23416746	2	-78	LOC_Os02g38620	retrotransposon protein, putative, Ty3-gypsy subclass
Ile	4	QTL_02_23416746	2	-71	LOC_Os02g38630	retrotransposon protein, putative, Ty3-gypsy subclass
Ile	4	QTL_02_23416746	2	-66	LOC_Os02g38640	retrotransposon protein, putative, Ty3-gypsy subclass
Ile	4	QTL_02_23416746	2	-60	LOC_Os02g38650	retrotransposon protein, putative, Ty3-gypsy subclass
Ile	4	QTL_02_23416746	2	-51	LOC_Os02g38660	retrotransposon protein, putative, unclassified
Ile	4	QTL_02_23416746	2	-47	LOC_Os02g38670	retrotransposon protein, putative, unclassified
Ile	4	QTL_02_23416746	2	-37	LOC_Os02g38680	EMB2423, putative
Ile	4	QTL_02_23416746	2	-30	LOC_Os02g38690	protein phosphatase 2C containing protein
Ile	4	QTL_02_23416746	2	-25	LOC_Os02g38700	transposon protein, putative, Ac/Ds sub-class
Ile	4	QTL_02_23416746	2	-17	LOC_Os02g38710	protein phosphatase 2C containing protein, expressed
Ile	4	QTL_02_23416746	2	-16	LOC_Os02g38720	OsFBX56 - F-box domain containing protein
Ile	4	QTL_02_23416746	2	-13	LOC_Os02g38730	hypothetical protein
Ile	4	QTL_02_23416746	2	-5	LOC_Os02g38740	expressed protein
Ile	4	QTL_02_23416746	2	-3	LOC_Os02g38750	hypothetical protein
Ile	4	QTL_02_23416746	2	4	LOC_Os02g38770	hypothetical protein
Ile	4	QTL_02_23416746	2	9	LOC_Os02g38780	protein phosphatase 2C containing protein, expressed
Ile	4	QTL_02_23416746	2	21	LOC_Os02g38790	expressed protein
Ile	4	QTL_02_23416746	2	27	LOC_Os02g38795	hypothetical protein
Ile	4	QTL_02_23416746	2	29	LOC_Os02g38800	26S proteasome non-ATPase regulatory subunit 6, putative, expressed
Ile	4	QTL_02_23416746	2	32	LOC_Os02g38804	protein phosphatase 2C containing protein, expressed
Ile	4	QTL_02_23416746	2	38	LOC_Os02g38810	26S proteasome non-ATPase regulatory subunit 6, putative, expressed
Ile	4	QTL_02_23416746	2	43	LOC_Os02g38820	expressed protein
Ile	4	QTL_02_23416746	2	51	LOC_Os02g38830	retrotransposon protein, putative, unclassified
Ile	4	QTL_02_23416746	2	57	LOC_Os02g38840	glucose-6-phosphate 1-dehydrogenase, cytoplasmic isoform, putative, expressed
Ile	4	QTL_02_23416746	2	72	LOC_Os02g38850	hypothetical protein
Ile	4	QTL_02_23416746	2	72	LOC_Os02g38860	expressed protein
Ile	4	QTL_02_23416746	2	84	LOC_Os02g38870	hypothetical protein
Ile	4	QTL_02_23416746	2	85	LOC_Os02g38880	hypothetical protein
Ile	4	QTL_02_23416746	2	90	LOC_Os02g38890	hypothetical protein
Ile	4	QTL_02_23416746	2	91	LOC_Os02g38900	cytosolic Fe-S cluster assembling factor NBP35, putative, expressed
Ile	4	QTL_02_23416746	2	96	LOC_Os02g38910	hypothetical protein
Ile	4	QTL_02_23416746	2	104	LOC_Os02g38920	glyceraldehyde-3-phosphate dehydrogenase, putative, expressed
Ile	4	QTL_02_23416746	2	108	LOC_Os02g38930	cytochrome P450 71D7, putative
Ile	4	QTL_02_23416746	2	112	LOC_Os02g38940	cytochrome P450, putative, expressed
Ile	4	QTL_02_23416746	2	115	LOC_Os02g38950	PPR repeat containing protein, expressed
Ile	4	QTL_02_23416746	2	118	LOC_Os02g38960	hypothetical protein
Ile	5	QTL_02_24189963	2	-111	LOC_Os02g39850	transferase family protein, putative, expressed
Ile	5	QTL_02_24189963	2	-106	LOC_Os02g39860	retrotransposon protein, putative, unclassified
Ile	5	QTL_02_24189963	2	-101	LOC_Os02g39870	co-chaperone GrpE protein, putative, expressed
Ile	5	QTL_02_24189963	2	-98	LOC_Os02g39880	expressed protein
Ile	5	QTL_02_24189963	2	-95	LOC_Os02g39884	expressed protein
Ile	5	QTL_02_24189963	2	-92	LOC_Os02g39890	RNA recognition motif containing protein, putative, expressed
Ile	5	QTL_02_24189963	2	-81	LOC_Os02g39900	transposon protein, putative, unclassified
Ile	5	QTL_02_24189963	2	-56	LOC_Os02g39910	B4-BTB1 - Bric-a-Brac, Tramtrack, Broad Complex BTB domain with B4 subfamily conserved sequence, expressed
Ile	5	QTL_02_24189963	2	-49	LOC_Os02g39920	AT hook motif family protein, expressed
Ile	5	QTL_02_24189963	2	-42	LOC_Os02g39930	OsTIL-1 Temperature-induced lipocalin-1, expressed
Ile	5	QTL_02_24189963	2	-39	LOC_Os02g39940	hypothetical protein
Ile	5	QTL_02_24189963	2	-32	LOC_Os02g39950	EF hand family protein, putative, expressed
Ile	5	QTL_02_24189963	2	-30	LOC_Os02g39960	exostosin family protein, putative
Ile	5	QTL_02_24189963	2	-21	LOC_Os02g39970	regulatory subunit, putative, expressed
Ile	5	QTL_02_24189963	2	-18	LOC_Os02g39980	hypothetical protein
Ile	5	QTL_02_24189963	2	-14	LOC_Os02g39990	expressed protein
Ile	5	QTL_02_24189963	2	0	LOC_Os02g40000	trafficking protein particle complex subunit, putative, expressed
Ile	5	QTL_02_24189963	2	27	LOC_Os02g40010	phosphoribosyl transferase, putative, expressed
Ile	5	QTL_02_24189963	2	33	LOC_Os02g40020	hypothetical protein
Ile	5	QTL_02_24189963	2	39	LOC_Os02g40030	transporter family protein, putative, expressed
Ile	5	QTL_02_24189963	2	44	LOC_Os02g40040	expressed protein
Ile	5	QTL_02_24189963	2	58	LOC_Os02g40050	retrotransposon protein, putative, unclassified
Ile	5	QTL_02_24189963	2	60	LOC_Os02g40060	retrotransposon protein, putative, unclassified
Ile	5	QTL_02_24189963	2	65	LOC_Os02g40070	AP2-like ethylene-responsive transcription factor PLETHORA 2, putative, expressed
Ile	5	QTL_02_24189963	2	72	LOC_Os02g40080	tic20, putative, expressed
Ile	5	QTL_02_24189963	2	74	LOC_Os02g40090	transporter-related, putative, expressed
Ile	5	QTL_02_24189963	2	80	LOC_Os02g40100	plant protein of unknown function DUF869 domain containing protein, expressed
Ile	5	QTL_02_24189963	2	87	LOC_Os02g40110	expressed protein
Ile	5	QTL_02_24189963	2	92	LOC_Os02g40120	hypothetical protein
Ile	5	QTL_02_24189963	2	97	LOC_Os02g40130	leucine-rich, putative, expressed
Ile	5	QTL_02_24189963	2	104	LOC_Os02g40140	transposon protein, putative, unclassified
Ile	5	QTL_02_24189963	2	109	LOC_Os02g40150	retrotransposon protein, putative, unclassified
Ile	5	QTL_02_24189963	2	111	LOC_Os02g40160	retrotransposon protein, putative, unclassified
Ile	5	QTL_02_24189963	2	115	LOC_Os02g40170	retrotransposon protein, putative, unclassified
Ile	6	QTL_04_12895359	4	-118	LOC_Os04g22580	retrotransposon protein, putative, Ty3-gypsy subclass
Ile	6	QTL_04_12895359	4	-112	LOC_Os04g22590	retrotransposon protein, putative, Ty3-gypsy subclass
Ile	6	QTL_04_12895359	4	-102	LOC_Os04g22600	retrotransposon protein, putative, Ty3-gypsy subclass
Ile	6	QTL_04_12895359	4	-93	LOC_Os04g22610	retrotransposon protein, putative, Ty3-gypsy subclass
Ile	6	QTL_04_12895359	4	-88	LOC_Os04g22620	retrotransposon protein, putative, Ty3-gypsy subclass
Ile	6	QTL_04_12895359	4	-82	LOC_Os04g22630	retrotransposon protein, putative, unclassified
Ile	6	QTL_04_12895359	4	-77	LOC_Os04g22640	retrotransposon protein, putative, Ty3-gypsy subclass
Ile	6	QTL_04_12895359	4	-65	LOC_Os04g22660	tropinone reductase, putative, expressed
Ile	6	QTL_04_12895359	4	-57	LOC_Os04g22670	hypothetical protein
Ile	6	QTL_04_12895359	4	-50	LOC_Os04g22680	retrotransposon protein, putative, Ty3-gypsy subclass
Ile	6	QTL_04_12895359	4	-37	LOC_Os04g22690	retrotransposon protein, putative, Ty3-gypsy subclass
Ile	6	QTL_04_12895359	4	-34	LOC_Os04g22700	expressed protein
Ile	6	QTL_04_12895359	4	-21	LOC_Os04g22720	expressed protein
Ile	6	QTL_04_12895359	4	-17	LOC_Os04g22730	tropinone reductase, putative
Ile	6	QTL_04_12895359	4	-13	LOC_Os04g22740	conserved hypothetical protein
Ile	6	QTL_04_12895359	4	-11	LOC_Os04g22750	hypothetical protein
Ile	6	QTL_04_12895359	4	-7	LOC_Os04g22760	conserved hypothetical protein
Ile	6	QTL_04_12895359	4	-5	LOC_Os04g22770	hypothetical protein
Ile	6	QTL_04_12895359	4	-2	LOC_Os04g22780	transposon protein, putative, unclassified
Ile	6	QTL_04_12895359	4	11	LOC_Os04g22800	hypothetical protein
Ile	6	QTL_04_12895359	4	17	LOC_Os04g22810	transposon protein, putative, CACTA, En/Spm sub-class
Ile	6	QTL_04_12895359	4	20	LOC_Os04g22820	hypothetical protein
Ile	6	QTL_04_12895359	4	23	LOC_Os04g22830	transposon protein, putative, CACTA, En/Spm sub-class
Ile	6	QTL_04_12895359	4	33	LOC_Os04g22840	transposon protein, putative, CACTA, En/Spm sub-class
Ile	6	QTL_04_12895359	4	38	LOC_Os04g22844	transposon protein, putative, CACTA, En/Spm sub-class
Ile	6	QTL_04_12895359	4	42	LOC_Os04g22850	transposon protein, putative, CACTA, En/Spm sub-class
Ile	6	QTL_04_12895359	4	48	LOC_Os04g22860	protein phosphatase 1 regulatory subunit 11, putative, expressed
Ile	6	QTL_04_12895359	4	51	LOC_Os04g22870	rpp14 family protein, expressed
Ile	6	QTL_04_12895359	4	67	LOC_Os04g22880	conserved hypothetical protein
Ile	6	QTL_04_12895359	4	77	LOC_Os04g22890	hypothetical protein
Ile	6	QTL_04_12895359	4	85	LOC_Os04g22900	jasmonate-induced protein, putative, expressed
Ile	6	QTL_04_12895359	4	93	LOC_Os04g22910	expressed protein
Ile	6	QTL_04_12895359	4	107	LOC_Os04g22920	retrotransposon protein, putative, unclassified
Ile	6	QTL_04_12895359	4	109	LOC_Os04g22930	transposon protein, putative, CACTA, En/Spm sub-class
Ile	6	QTL_04_12895359	4	113	LOC_Os04g22940	conserved hypothetical protein
Ile	7	QTL_04_18136896	4	-114	LOC_Os04g30450	DUF803 domain containing, putative, expressed
Ile	7	QTL_04_18136896	4	-108	LOC_Os04g30460	conserved hypothetical protein
Ile	7	QTL_04_18136896	4	-104	LOC_Os04g30470	U-box domain-containing protein, putative
Ile	7	QTL_04_18136896	4	-103	LOC_Os04g30480	hypothetical protein
Ile	7	QTL_04_18136896	4	-92	LOC_Os04g30490	MATE efflux family protein, putative, expressed
Ile	7	QTL_04_18136896	4	-89	LOC_Os04g30500	retrotransposon protein, putative, unclassified
Ile	7	QTL_04_18136896	4	-78	LOC_Os04g30510	retrotransposon protein, putative, unclassified
Ile	7	QTL_04_18136896	4	-70	LOC_Os04g30520	hypothetical protein
Ile	7	QTL_04_18136896	4	-58	LOC_Os04g30530	disease resistance protein RGA2, putative, expressed
Ile	7	QTL_04_18136896	4	-56	LOC_Os04g30540	Leucine Rich Repeat family protein
Ile	7	QTL_04_18136896	4	-53	LOC_Os04g30550	GDP-mannose 4,6 dehydratase 1, putative
Ile	7	QTL_04_18136896	4	-52	LOC_Os04g30560	hypothetical protein
Ile	7	QTL_04_18136896	4	-49	LOC_Os04g30570	transferase family protein, putative
Ile	7	QTL_04_18136896	4	-44	LOC_Os04g30580	transposon protein, putative, CACTA, En/Spm sub-class
Ile	7	QTL_04_18136896	4	-38	LOC_Os04g30590	transposon protein, putative, CACTA, En/Spm sub-class
Ile	7	QTL_04_18136896	4	-34	LOC_Os04g30600	conserved hypothetical protein
Ile	7	QTL_04_18136896	4	-27	LOC_Os04g30610	disease resistance protein RGA2, putative
Ile	7	QTL_04_18136896	4	-18	LOC_Os04g30620	retrotransposon protein, putative, Ty3-gypsy subclass
Ile	7	QTL_04_18136896	4	-11	LOC_Os04g30630	retrotransposon protein, putative, Ty3-gypsy subclass
Ile	7	QTL_04_18136896	4	-10	LOC_Os04g30640	retrotransposon protein, putative, Ty3-gypsy subclass
Ile	7	QTL_04_18136896	4	9	LOC_Os04g30660	NBS type disease resistance protein, putative, expressed
Ile	7	QTL_04_18136896	4	18	LOC_Os04g30670	hypothetical protein
Ile	7	QTL_04_18136896	4	29	LOC_Os04g30680	conserved hypothetical protein
Ile	7	QTL_04_18136896	4	32	LOC_Os04g30690	NBS type disease resistance protein, putative
Ile	7	QTL_04_18136896	4	44	LOC_Os04g30700	conserved hypothetical protein
Ile	7	QTL_04_18136896	4	48	LOC_Os04g30710	conserved hypothetical protein
Ile	7	QTL_04_18136896	4	52	LOC_Os04g30720	kinesin motor domain containing protein, putative, expressed
Ile	7	QTL_04_18136896	4	60	LOC_Os04g30730	ribosomal protein L29, putative, expressed
Ile	7	QTL_04_18136896	4	62	LOC_Os04g30740	mitochondrial import inner membrane translocase subunit Tim17, putative, expressed
Ile	7	QTL_04_18136896	4	69	LOC_Os04g30750	expressed protein
Ile	7	QTL_04_18136896	4	73	LOC_Os04g30760	3-oxoacyl-reductase, chloroplast precursor, putative, expressed
Ile	7	QTL_04_18136896	4	83	LOC_Os04g30770	glycosyl hydrolase, putative, expressed
Ile	7	QTL_04_18136896	4	92	LOC_Os04g30780	eukaryotic translation initiation factor 3 subunit H, putative, expressed
Ile	7	QTL_04_18136896	4	98	LOC_Os04g30790	expressed protein
Ile	7	QTL_04_18136896	4	105	LOC_Os04g30800	ER lumen protein retaining receptor, putative, expressed
Ile	7	QTL_04_18136896	4	110	LOC_Os04g30810	OsFBX129 - F-box domain containing protein
Ile	7	QTL_04_18136896	4	114	LOC_Os04g30820	hypothetical protein
Ile	7	QTL_04_18136896	4	117	LOC_Os04g30830	F-box domain containing protein
Ile	7	QTL_04_18136896	4	121	LOC_Os04g30840	hypothetical protein
Ile	8	QTL_04_34516031	4	-121	LOC_Os04g58055	expressed protein
Ile	8	QTL_04_34516031	4	-115	LOC_Os04g58060	methyltransferase, putative, expressed
Ile	8	QTL_04_34516031	4	-112	LOC_Os04g58070	aspartic proteinase nepenthesin precursor, putative, expressed
Ile	8	QTL_04_34516031	4	-103	LOC_Os04g58080	polygalacturonase inhibitor 3 precursor, putative, expressed
Ile	8	QTL_04_34516031	4	-102	LOC_Os04g58090	harpin-induced protein 1 domain containing protein, expressed
Ile	8	QTL_04_34516031	4	-96	LOC_Os04g58100	expressed protein
Ile	8	QTL_04_34516031	4	-92	LOC_Os04g58110	pyruvate kinase, putative, expressed
Ile	8	QTL_04_34516031	4	-87	LOC_Os04g58120	CRP2 - Cysteine-rich family protein precursor, expressed
Ile	8	QTL_04_34516031	4	-78	LOC_Os04g58130	katanin p80 WD40 repeat-containing subunit B1 homolog 1, putative, expressed
Ile	8	QTL_04_34516031	4	-69	LOC_Os04g58140	elongation factor Tu, putative, expressed
Ile	8	QTL_04_34516031	4	-62	LOC_Os04g58150	transposon protein, putative, unclassified
Ile	8	QTL_04_34516031	4	-56	LOC_Os04g58160	fiber protein Fb34, putative, expressed
Ile	8	QTL_04_34516031	4	-45	LOC_Os04g58180	WD-40 repeat family protein, putative, expressed
Ile	8	QTL_04_34516031	4	-44	LOC_Os04g58190	dof zinc finger domain containing protein, putative, expressed
Ile	8	QTL_04_34516031	4	-36	LOC_Os04g58200	protochlorophyllide reductase A, chloroplast precursor, putative, expressed
Ile	8	QTL_04_34516031	4	-32	LOC_Os04g58210	N-acetylglucosaminyl-phosphatidylinositol de-N-acetylase, putative, expressed
Ile	8	QTL_04_34516031	4	-29	LOC_Os04g58220	transporter family protein, putative
Ile	8	QTL_04_34516031	4	-26	LOC_Os04g58230	transporter family protein, putative, expressed
Ile	8	QTL_04_34516031	4	-19	LOC_Os04g58240	expressed protein
Ile	8	QTL_04_34516031	4	-15	LOC_Os04g58250	protein kinase, putative, expressed
Ile	8	QTL_04_34516031	4	-9	LOC_Os04g58270	conserved hypothetical protein
Ile	8	QTL_04_34516031	4	-3	LOC_Os04g58280	stem-specific protein TSJT1, putative, expressed
Ile	8	QTL_04_34516031	4	1	LOC_Os04g58300	retrotransposon protein, putative, Ty1-copia subclass
Ile	8	QTL_04_34516031	4	5	LOC_Os04g58310	CBS domain-containing protein, putative, expressed
Ile	8	QTL_04_34516031	4	13	LOC_Os04g58320	zinc finger, RING-type, putative, expressed
Ile	8	QTL_04_34516031	4	16	LOC_Os04g58330	expressed protein
Ile	8	QTL_04_34516031	4	23	LOC_Os04g58340	conserved hypothetical protein
Ile	8	QTL_04_34516031	4	24	LOC_Os04g58350	TFIIH basal transcription factor complex p52 subunit, putative, expressed
Ile	8	QTL_04_34516031	4	29	LOC_Os04g58360	hypothetical protein
Ile	8	QTL_04_34516031	4	31	LOC_Os04g58370	expressed protein
Ile	8	QTL_04_34516031	4	32	LOC_Os04g58380	expressed protein
Ile	8	QTL_04_34516031	4	36	LOC_Os04g58390	allantoinase, putative, expressed
Ile	8	QTL_04_34516031	4	42	LOC_Os04g58400	tRNA synthetase, putative, expressed
Ile	8	QTL_04_34516031	4	50	LOC_Os04g58410	smr domain containing protein, expressed
Ile	8	QTL_04_34516031	4	60	LOC_Os04g58420	MLO domain containing protein, putative, expressed
Ile	8	QTL_04_34516031	4	64	LOC_Os04g58430	retrotransposon protein, putative, unclassified
Ile	8	QTL_04_34516031	4	66	LOC_Os04g58440	retrotransposon protein, putative, unclassified
Ile	8	QTL_04_34516031	4	67	LOC_Os04g58450	retrotransposon protein, putative, unclassified
Ile	8	QTL_04_34516031	4	75	LOC_Os04g58460	expressed protein
Ile	8	QTL_04_34516031	4	79	LOC_Os04g58470	choline transporter-related, putative, expressed
Ile	8	QTL_04_34516031	4	86	LOC_Os04g58480	EF hand family protein, putative, expressed
Ile	8	QTL_04_34516031	4	89	LOC_Os04g58490	conserved hypothetical protein
Ile	8	QTL_04_34516031	4	90	LOC_Os04g58504	choline transporter-related, putative, expressed
Ile	8	QTL_04_34516031	4	103	LOC_Os04g58520	hypothetical protein
Ile	8	QTL_04_34516031	4	105	LOC_Os04g58530	hypothetical protein
Ile	8	QTL_04_34516031	4	106	LOC_Os04g58540	transposon protein, putative, Mariner sub-class
Ile	8	QTL_04_34516031	4	109	LOC_Os04g58550	acyl-CoA-binding domain-containing protein 6, putative, expressed
Ile	8	QTL_04_34516031	4	113	LOC_Os04g58555	X8 domain containing protein
Ile	8	QTL_04_34516031	4	115	LOC_Os04g58560	cysteine protease ATG4, putative, expressed
Ile	9	QTL_04_34755453	4	-117	LOC_Os04g58564	GA18008-PA, putative, expressed
Ile	9	QTL_04_34755453	4	-114	LOC_Os04g58570	C2 domain containing protein, putative, expressed
Ile	9	QTL_04_34755453	4	-109	LOC_Os04g58580	phosphomannomutase, putative, expressed
Ile	9	QTL_04_34755453	4	-103	LOC_Os04g58590	RNA recognition motif containing protein, putative, expressed
Ile	9	QTL_04_34755453	4	-97	LOC_Os04g58600	L-asparaginase precursor protein, putative, expressed
Ile	9	QTL_04_34755453	4	-85	LOC_Os04g58610	retrotransposon protein, putative, unclassified, expressed
Ile	9	QTL_04_34755453	4	-70	LOC_Os04g58620	potasium efflux antiporter protein, putative, expressed
Ile	9	QTL_04_34755453	4	-63	LOC_Os04g58630	DNA mismatch repair protein MSH3, putative, expressed
Ile	9	QTL_04_34755453	4	-58	LOC_Os04g58640	cleavage and polyadenylation specificity factor subunit 5, putative, expressed
Ile	9	QTL_04_34755453	4	-55	LOC_Os04g58650	retrotransposon protein, putative, unclassified
Ile	9	QTL_04_34755453	4	-53	LOC_Os04g58660	retrotransposon protein, putative, unclassified
Ile	9	QTL_04_34755453	4	-48	LOC_Os04g58680	core histone H2A/H2B/H3/H4, putative, expressed
Ile	9	QTL_04_34755453	4	-41	LOC_Os04g58690	tRNA-specific adenosine deaminase 1, putative, expressed
Ile	9	QTL_04_34755453	4	-33	LOC_Os04g58700	expressed protein
Ile	9	QTL_04_34755453	4	-29	LOC_Os04g58710	AMP-binding domain containing protein, expressed
Ile	9	QTL_04_34755453	4	-20	LOC_Os04g58720	anthranilate phosphoribosyltransferase, putative, expressed
Ile	9	QTL_04_34755453	4	-14	LOC_Os04g58730	AT hook motif domain containing protein, expressed
Ile	9	QTL_04_34755453	4	-8	LOC_Os04g58734	expressed protein
Ile	9	QTL_04_34755453	4	0	LOC_Os04g58740	expressed protein
Ile	9	QTL_04_34755453	4	2	LOC_Os04g58750	protein kinase family protein, putative, expressed
Ile	9	QTL_04_34755453	4	9	LOC_Os04g58760	membrane associated DUF588 domain containing protein, putative, expressed
Ile	9	QTL_04_34755453	4	15	LOC_Os04g58770	hypothetical protein
Ile	9	QTL_04_34755453	4	18	LOC_Os04g58780	pentatricopeptide repeat protein, putative, expressed
Ile	9	QTL_04_34755453	4	31	LOC_Os04g58790	hypothetical protein
Ile	9	QTL_04_34755453	4	35	LOC_Os04g58800	ubiquitin-conjugating enzyme, putative, expressed
Ile	9	QTL_04_34755453	4	40	LOC_Os04g58810	CAF1 family ribonuclease containing protein, putative, expressed
Ile	9	QTL_04_34755453	4	48	LOC_Os04g58820	ATOFP18/OFP18, putative, expressed
Ile	9	QTL_04_34755453	4	51	LOC_Os04g58830	ribosome biogenesis regulatory protein, putative, expressed
Ile	9	QTL_04_34755453	4	56	LOC_Os04g58840	Eukaryotic aspartyl protease domain containing protein, expressed
Ile	9	QTL_04_34755453	4	60	LOC_Os04g58850	harpin-induced protein 1 domain containing protein, expressed
Ile	9	QTL_04_34755453	4	70	LOC_Os04g58860	harpin-induced protein 1 domain containing protein, expressed
Ile	9	QTL_04_34755453	4	76	LOC_Os04g58870	exo70 exocyst complex subunit, putative, expressed
Ile	9	QTL_04_34755453	4	81	LOC_Os04g58880	exo70 exocyst complex subunit, putative, expressed
Ile	9	QTL_04_34755453	4	90	LOC_Os04g58890	expressed protein
Ile	9	QTL_04_34755453	4	94	LOC_Os04g58900	hydrolase, NUDIX family, domain containing protein, expressed
Ile	9	QTL_04_34755453	4	99	LOC_Os04g58910	receptor protein kinase TMK1 precursor, putative, expressed
Ile	9	QTL_04_34755453	4	113	LOC_Os04g58920	U-box domain-containing protein, putative, expressed
Ile	10	QTL_05_19754561	5	-118	LOC_Os05g33530	hypothetical protein
Ile	10	QTL_05_19754561	5	-112	LOC_Os05g33550	methyl-binding domain protein MBD, putative, expressed
Ile	10	QTL_05_19754561	5	-109	LOC_Os05g33554	methyl-binding domain protein MBD, putative, expressed
Ile	10	QTL_05_19754561	5	-101	LOC_Os05g33560	hypothetical protein
Ile	10	QTL_05_19754561	5	-79	LOC_Os05g33570	pyruvate, phosphate dikinase, chloroplast precursor, putative, expressed
Ile	10	QTL_05_19754561	5	-76	LOC_Os05g33580	expressed protein
Ile	10	QTL_05_19754561	5	-72	LOC_Os05g33590	cytochrome P450, putative, expressed
Ile	10	QTL_05_19754561	5	-58	LOC_Os05g33600	cytochrome P450 72A1, putative, expressed
Ile	10	QTL_05_19754561	5	-42	LOC_Os05g33610	expressed protein
Ile	10	QTL_05_19754561	5	-36	LOC_Os05g33620	expressed protein
Ile	10	QTL_05_19754561	5	-31	LOC_Os05g33630	inosine-uridine preferring nucleoside hydrolase family protein, putative, expressed
Ile	10	QTL_05_19754561	5	-11	LOC_Os05g33644	inosine-uridine preferring nucleoside hydrolase family protein, putative, expressed
Ile	10	QTL_05_19754561	5	-5	LOC_Os05g33660	hypothetical protein
Ile	10	QTL_05_19754561	5	-3	LOC_Os05g33670	hypothetical protein
Ile	10	QTL_05_19754561	5	11	LOC_Os05g33690	receptor-like protein kinase precursor, putative, expressed
Ile	10	QTL_05_19754561	5	16	LOC_Os05g33700	4F5 protein family protein
Ile	10	QTL_05_19754561	5	20	LOC_Os05g33710	WD domain, G-beta repeat domain containing protein, expressed
Ile	10	QTL_05_19754561	5	46	LOC_Os05g33720	retrotransposon protein, putative, unclassified
Ile	10	QTL_05_19754561	5	51	LOC_Os05g33730	gibberellin receptor GID1L2, putative, expressed
Ile	10	QTL_05_19754561	5	59	LOC_Os05g33740	retrotransposon protein, putative, unclassified
Ile	10	QTL_05_19754561	5	61	LOC_Os05g33750	retrotransposon protein, putative, unclassified
Ile	10	QTL_05_19754561	5	77	LOC_Os05g33760	PPR repeat domain containing protein, putative, expressed
Ile	10	QTL_05_19754561	5	83	LOC_Os05g33770	conserved hypothetical protein
Ile	10	QTL_05_19754561	5	85	LOC_Os05g33780	hypothetical protein
Ile	10	QTL_05_19754561	5	93	LOC_Os05g33790	retrotransposon protein, putative, Ty1-copia subclass
Ile	10	QTL_05_19754561	5	100	LOC_Os05g33800	retrotransposon, putative, centromere-specific
Ile	10	QTL_05_19754561	5	106	LOC_Os05g33810	OsSPL9 - SBP-box gene family member, expressed
Ile	10	QTL_05_19754561	5	117	LOC_Os05g33820	lipase, putative, expressed
Ile	11	QTL_06_21015140	6	-114	LOC_Os06g35814	ras-related protein, putative, expressed
Ile	11	QTL_06_21015140	6	-108	LOC_Os06g35830	expressed protein
Ile	11	QTL_06_21015140	6	-101	LOC_Os06g35840	retrotransposon protein, putative, Ty1-copia subclass
Ile	11	QTL_06_21015140	6	-97	LOC_Os06g35850	lectin protein kinase family protein, putative, expressed
Ile	11	QTL_06_21015140	6	-89	LOC_Os06g35860	hypothetical protein
Ile	11	QTL_06_21015140	6	-84	LOC_Os06g35870	lectin protein kinase family protein, putative
Ile	11	QTL_06_21015140	6	-81	LOC_Os06g35880	hypothetical protein
Ile	11	QTL_06_21015140	6	-76	LOC_Os06g35890	hypothetical protein
Ile	11	QTL_06_21015140	6	-71	LOC_Os06g35900	BES1/BZR1 homolog protein, putative, expressed
Ile	11	QTL_06_21015140	6	-63	LOC_Os06g35910	FYVE zinc finger domain containing protein, expressed
Ile	11	QTL_06_21015140	6	-61	LOC_Os06g35920	conserved hypothetical protein
Ile	11	QTL_06_21015140	6	-54	LOC_Os06g35930	aquaporin protein, putative
Ile	11	QTL_06_21015140	6	-41	LOC_Os06g35940	osFTL12 FT-Like12 homologous to Flowering Locus T gene; contains Pfam profile PF01161: Phosphatidylethanolamine-binding protein, expressed
Ile	11	QTL_06_21015140	6	-32	LOC_Os06g35950	conserved hypothetical protein
Ile	11	QTL_06_21015140	6	-17	LOC_Os06g35960	HSF-type DNA-binding domain containing protein, expressed
Ile	11	QTL_06_21015140	6	-7	LOC_Os06g35970	meiosis 5, putative, expressed
Ile	11	QTL_06_21015140	6	0	LOC_Os06g35980	hypothetical protein
Ile	11	QTL_06_21015140	6	5	LOC_Os06g35990	hypothetical protein
Ile	11	QTL_06_21015140	6	24	LOC_Os06g36000	AP2 domain containing protein, expressed
Ile	11	QTL_06_21015140	6	32	LOC_Os06g36010	plastocyanin-like domain containing protein, putative, expressed
Ile	11	QTL_06_21015140	6	39	LOC_Os06g36020	retrotransposon protein, putative, unclassified
Ile	11	QTL_06_21015140	6	44	LOC_Os06g36030	SWIM zinc finger family protein, expressed
Ile	11	QTL_06_21015140	6	47	LOC_Os06g36040	expressed protein
Ile	11	QTL_06_21015140	6	50	LOC_Os06g36050	expressed protein
Ile	11	QTL_06_21015140	6	57	LOC_Os06g36060	retrotransposon protein, putative, unclassified
Ile	11	QTL_06_21015140	6	73	LOC_Os06g36070	expressed protein
Ile	11	QTL_06_21015140	6	87	LOC_Os06g36080	kinesin motor domain containing protein, expressed
Ile	11	QTL_06_21015140	6	97	LOC_Os06g36090	ABC-2 type transporter, putative, expressed
Ile	12	QTL_07_08680072	7	-115	LOC_Os07g14940	transposon protein, putative, CACTA, En/Spm sub-class
Ile	12	QTL_07_08680072	7	-102	LOC_Os07g14950	retrotransposon protein, putative, unclassified
Ile	12	QTL_07_08680072	7	-95	LOC_Os07g14960	retrotransposon protein, putative, unclassified
Ile	12	QTL_07_08680072	7	-89	LOC_Os07g14970	retrotransposon protein, putative, unclassified
Ile	12	QTL_07_08680072	7	-87	LOC_Os07g14980	retrotransposon protein, putative, unclassified
Ile	12	QTL_07_08680072	7	-82	LOC_Os07g14990	retrotransposon protein, putative, Ty3-gypsy subclass
Ile	12	QTL_07_08680072	7	-79	LOC_Os07g15000	hypothetical protein
Ile	12	QTL_07_08680072	7	-75	LOC_Os07g15010	hypothetical protein
Ile	12	QTL_07_08680072	7	-69	LOC_Os07g15020	conserved hypothetical protein
Ile	12	QTL_07_08680072	7	-61	LOC_Os07g15030	retrotransposon protein, putative, unclassified
Ile	12	QTL_07_08680072	7	-55	LOC_Os07g15040	retrotransposon protein, putative, unclassified
Ile	12	QTL_07_08680072	7	-52	LOC_Os07g15050	retrotransposon protein, putative, unclassified
Ile	12	QTL_07_08680072	7	-49	LOC_Os07g15060	retrotransposon, putative, centromere-specific
Ile	12	QTL_07_08680072	7	-46	LOC_Os07g15070	retrotransposon, putative, centromere-specific
Ile	12	QTL_07_08680072	7	-36	LOC_Os07g15080	retrotransposon protein, putative, Ty3-gypsy subclass
Ile	12	QTL_07_08680072	7	-32	LOC_Os07g15090	transposon protein, putative, unclassified
Ile	12	QTL_07_08680072	7	-19	LOC_Os07g15100	hypothetical protein
Ile	12	QTL_07_08680072	7	-10	LOC_Os07g15110	retrotransposon protein, putative, unclassified
Ile	12	QTL_07_08680072	7	-4	LOC_Os07g15120	transposon protein, putative, unclassified
Ile	12	QTL_07_08680072	7	0	LOC_Os07g15130	hypothetical protein
Ile	12	QTL_07_08680072	7	8	LOC_Os07g15140	transposon protein, putative, CACTA, En/Spm sub-class
Ile	12	QTL_07_08680072	7	15	LOC_Os07g15150	transposon protein, putative, CACTA, En/Spm sub-class
Ile	12	QTL_07_08680072	7	21	LOC_Os07g15160	retrotransposon protein, putative, unclassified, expressed
Ile	12	QTL_07_08680072	7	64	LOC_Os07g15170	transposon protein, putative, CACTA, En/Spm sub-class
Ile	12	QTL_07_08680072	7	71	LOC_Os07g15180	transposon protein, putative, unclassified
Ile	12	QTL_07_08680072	7	76	LOC_Os07g15190	3-ketoacyl-CoA synthase 2, putative
Ile	12	QTL_07_08680072	7	79	LOC_Os07g15200	hypothetical protein
Ile	12	QTL_07_08680072	7	82	LOC_Os07g15210	retrotransposon protein, putative, Ty3-gypsy subclass
Ile	12	QTL_07_08680072	7	92	LOC_Os07g15220	hypothetical protein
Ile	12	QTL_07_08680072	7	102	LOC_Os07g15230	expressed protein
Ile	12	QTL_07_08680072	7	106	LOC_Os07g15240	hypothetical protein
Ile	12	QTL_07_08680072	7	109	LOC_Os07g15250	retrotransposon protein, putative, unclassified
Ile	12	QTL_07_08680072	7	116	LOC_Os07g15260	retrotransposon protein, putative, Ty1-copia subclass
Ile	13	QTL_08_15978346	8	-118	LOC_Os08g26070	transposon protein, putative, CACTA, En/Spm sub-class
Ile	13	QTL_08_15978346	8	-115	LOC_Os08g26080	latency associated nuclear antigen, putative
Ile	13	QTL_08_15978346	8	-111	LOC_Os08g26090	transposon protein, putative, CACTA, En/Spm sub-class
Ile	13	QTL_08_15978346	8	-107	LOC_Os08g26100	hypothetical protein
Ile	13	QTL_08_15978346	8	-104	LOC_Os08g26110	dirigent, putative
Ile	13	QTL_08_15978346	8	-91	LOC_Os08g26120	expressed protein
Ile	13	QTL_08_15978346	8	-76	LOC_Os08g26140	retrotransposon, putative, centromere-specific
Ile	13	QTL_08_15978346	8	-69	LOC_Os08g26150	hypothetical protein
Ile	13	QTL_08_15978346	8	-65	LOC_Os08g26160	retrotransposon, putative, centromere-specific
Ile	13	QTL_08_15978346	8	-59	LOC_Os08g26170	retrotransposon protein, putative, unclassified
Ile	13	QTL_08_15978346	8	-56	LOC_Os08g26180	dirigent, putative
Ile	13	QTL_08_15978346	8	-46	LOC_Os08g26190	retrotransposon protein, putative, Ty1-copia subclass
Ile	13	QTL_08_15978346	8	-42	LOC_Os08g26200	conserved hypothetical protein
Ile	13	QTL_08_15978346	8	-24	LOC_Os08g26210	conserved hypothetical protein
Ile	13	QTL_08_15978346	8	-3	LOC_Os08g26220	expressed protein
Ile	13	QTL_08_15978346	8	3	LOC_Os08g26230	expressed protein
Ile	13	QTL_08_15978346	8	20	LOC_Os08g26240	hypothetical protein
Ile	13	QTL_08_15978346	8	25	LOC_Os08g26250	retrotransposon protein, putative, unclassified
Ile	13	QTL_08_15978346	8	27	LOC_Os08g26260	retrotransposon protein, putative, Ty3-gypsy subclass, expressed
Ile	13	QTL_08_15978346	8	34	LOC_Os08g26270	hypothetical protein
Ile	13	QTL_08_15978346	8	36	LOC_Os08g26280	transposon protein, putative, CACTA, En/Spm sub-class
Ile	13	QTL_08_15978346	8	43	LOC_Os08g26290	transposon protein, putative, CACTA, En/Spm sub-class
Ile	13	QTL_08_15978346	8	58	LOC_Os08g26300	retrotransposon protein, putative, unclassified
Ile	13	QTL_08_15978346	8	67	LOC_Os08g26310	conserved hypothetical protein
Ile	13	QTL_08_15978346	8	69	LOC_Os08g26320	hypothetical protein
Ile	13	QTL_08_15978346	8	71	LOC_Os08g26330	retrotransposon protein, putative, unclassified
Ile	13	QTL_08_15978346	8	80	LOC_Os08g26340	hypothetical protein
Ile	13	QTL_08_15978346	8	83	LOC_Os08g26350	expressed protein
Ile	13	QTL_08_15978346	8	89	LOC_Os08g26360	expressed protein
Ile	13	QTL_08_15978346	8	91	LOC_Os08g26370	hypothetical protein
Ile	13	QTL_08_15978346	8	97	LOC_Os08g26380	hypothetical protein
Ile	13	QTL_08_15978346	8	101	LOC_Os08g26390	retrotransposon protein, putative, unclassified
Ile	13	QTL_08_15978346	8	103	LOC_Os08g26400	retrotransposon, putative, centromere-specific
Ile	13	QTL_08_15978346	8	112	LOC_Os08g26409	hypothetical protein
Ile	13	QTL_08_15978346	8	114	LOC_Os08g26420	hypothetical protein
Ile	14	QTL_10_08138230	10	-115	LOC_Os10g15260	retrotransposon protein, putative, unclassified
Ile	14	QTL_10_08138230	10	-110	LOC_Os10g15270	retrotransposon protein, putative, unclassified
Ile	14	QTL_10_08138230	10	-101	LOC_Os10g15279	retrotransposon, putative, centromere-specific
Ile	14	QTL_10_08138230	10	-99	LOC_Os10g15290	retrotransposon, putative, centromere-specific
Ile	14	QTL_10_08138230	10	-94	LOC_Os10g15300	expressed protein
Ile	14	QTL_10_08138230	10	-87	LOC_Os10g15310	expressed protein
Ile	14	QTL_10_08138230	10	-85	LOC_Os10g15320	retrotransposon protein, putative, unclassified
Ile	14	QTL_10_08138230	10	-81	LOC_Os10g15330	retrotransposon protein, putative, Ty3-gypsy subclass
Ile	14	QTL_10_08138230	10	-73	LOC_Os10g15340	retrotransposon protein, putative, unclassified
Ile	14	QTL_10_08138230	10	-58	LOC_Os10g15360	retrotransposon protein, putative, unclassified
Ile	14	QTL_10_08138230	10	-54	LOC_Os10g15370	expressed protein
Ile	14	QTL_10_08138230	10	-43	LOC_Os10g15390	ribosomal protein S7, putative, expressed
Ile	14	QTL_10_08138230	10	-34	LOC_Os10g16390	retrotransposon protein, putative, Ty3-gypsy subclass
Ile	14	QTL_10_08138230	10	-33	LOC_Os10g16400	retrotransposon protein, putative, unclassified
Ile	14	QTL_10_08138230	10	-28	LOC_Os10g16410	retrotransposon protein, putative, unclassified
Ile	14	QTL_10_08138230	10	-16	LOC_Os10g16430	conserved hypothetical protein
Ile	14	QTL_10_08138230	10	-8	LOC_Os10g16440	CUE domain containing protein, expressed
Ile	14	QTL_10_08138230	10	-2	LOC_Os10g16450	retrotransposon protein, putative, unclassified
Ile	14	QTL_10_08138230	10	2	LOC_Os10g16470	retrotransposon protein, putative, unclassified
Ile	14	QTL_10_08138230	10	7	LOC_Os10g16480	retrotransposon protein, putative, Ty3-gypsy subclass
Ile	14	QTL_10_08138230	10	16	LOC_Os10g16490	retrotransposon protein, putative, unclassified
Ile	14	QTL_10_08138230	10	19	LOC_Os10g16500	conserved hypothetical protein
Ile	14	QTL_10_08138230	10	22	LOC_Os10g16510	retrotransposon protein, putative, unclassified
Ile	14	QTL_10_08138230	10	26	LOC_Os10g16520	retrotransposon protein, putative, unclassified
Ile	14	QTL_10_08138230	10	30	LOC_Os10g16530	retrotransposon protein, putative, unclassified
Ile	14	QTL_10_08138230	10	33	LOC_Os10g16540	retrotransposon protein, putative, Ty3-gypsy subclass
Ile	14	QTL_10_08138230	10	38	LOC_Os10g16550	retrotransposon protein, putative, Ty3-gypsy subclass
Ile	14	QTL_10_08138230	10	44	LOC_Os10g16560	retrotransposon protein, putative, unclassified, expressed
Ile	14	QTL_10_08138230	10	56	LOC_Os10g16570	retrotransposon protein, putative, unclassified
Ile	14	QTL_10_08138230	10	58	LOC_Os10g16580	retrotransposon, putative, centromere-specific
Ile	14	QTL_10_08138230	10	65	LOC_Os10g16600	retrotransposon protein, putative, Ty3-gypsy subclass
Ile	14	QTL_10_08138230	10	74	LOC_Os10g16610	retrotransposon, putative, centromere-specific
Ile	14	QTL_10_08138230	10	77	LOC_Os10g16620	hypothetical protein
Ile	14	QTL_10_08138230	10	81	LOC_Os10g16630	retrotransposon protein, putative, Ty3-gypsy subclass
Ile	14	QTL_10_08138230	10	85	LOC_Os10g16640	expressed protein
Ile	14	QTL_10_08138230	10	99	LOC_Os10g16650	retrotransposon protein, putative, unclassified
Ile	14	QTL_10_08138230	10	102	LOC_Os10g16660	retrotransposon protein, putative, unclassified
Ile	14	QTL_10_08138230	10	103	LOC_Os10g16670	retrotransposon protein, putative, unclassified
Ile	14	QTL_10_08138230	10	108	LOC_Os10g16680	retrotransposon protein, putative, unclassified
Ile	14	QTL_10_08138230	10	111	LOC_Os10g16690	retrotransposon protein, putative, unclassified
Ile	14	QTL_10_08138230	10	114	LOC_Os10g16700	retrotransposon protein, putative, Ty3-gypsy subclass
Ile	15	QTL_10_08684777	10	-106	LOC_Os10g17210	retrotransposon protein, putative, unclassified
Ile	15	QTL_10_08684777	10	-100	LOC_Os10g17220	retrotransposon, putative, centromere-specific
Ile	15	QTL_10_08684777	10	-87	LOC_Os10g17230	retrotransposon protein, putative, Ty3-gypsy subclass
Ile	15	QTL_10_08684777	10	-84	LOC_Os10g17240	retrotransposon protein, putative, Ty3-gypsy subclass
Ile	15	QTL_10_08684777	10	-77	LOC_Os10g17250	retrotransposon protein, putative, Ty3-gypsy subclass
Ile	15	QTL_10_08684777	10	-74	LOC_Os10g17260	cytochrome P450, putative, expressed
Ile	15	QTL_10_08684777	10	-70	LOC_Os10g17270	hypothetical protein
Ile	15	QTL_10_08684777	10	-58	LOC_Os10g17280	ATP synthase gamma chain, putative, expressed
Ile	15	QTL_10_08684777	10	-55	LOC_Os10g17290	retrotransposon protein, putative, unclassified
Ile	15	QTL_10_08684777	10	-50	LOC_Os10g17300	retrotransposon protein, putative, Ty3-gypsy subclass
Ile	15	QTL_10_08684777	10	-46	LOC_Os10g17310	retrotransposon protein, putative, Ty3-gypsy subclass
Ile	15	QTL_10_08684777	10	-38	LOC_Os10g17320	retrotransposon protein, putative, unclassified
Ile	15	QTL_10_08684777	10	-34	LOC_Os10g17330	retrotransposon protein, putative, Ty3-gypsy subclass
Ile	15	QTL_10_08684777	10	-20	LOC_Os10g17340	retrotransposon protein, putative, Ty3-gypsy subclass
Ile	15	QTL_10_08684777	10	-12	LOC_Os10g17350	retrotransposon protein, putative, Ty3-gypsy subclass
Ile	15	QTL_10_08684777	10	-4	LOC_Os10g17360	retrotransposon protein, putative, Ty3-gypsy subclass
Ile	15	QTL_10_08684777	10	3	LOC_Os10g17380	retrotransposon protein, putative, unclassified
Ile	15	QTL_10_08684777	10	6	LOC_Os10g17390	retrotransposon protein, putative, unclassified
Ile	15	QTL_10_08684777	10	12	LOC_Os10g17400	retrotransposon, putative, centromere-specific
Ile	15	QTL_10_08684777	10	19	LOC_Os10g17410	retrotransposon protein, putative, unclassified
Ile	15	QTL_10_08684777	10	25	LOC_Os10g17430	retrotransposon protein, putative, Ty3-gypsy subclass
Ile	15	QTL_10_08684777	10	26	LOC_Os10g17440	retrotransposon protein, putative, unclassified
Ile	15	QTL_10_08684777	10	31	LOC_Os10g17454	RNA recognition motif containing protein, expressed
Ile	15	QTL_10_08684777	10	49	LOC_Os10g17470	retrotransposon protein, putative, unclassified
Ile	15	QTL_10_08684777	10	59	LOC_Os10g17489	UDP-glucoronosyl and UDP-glucosyl transferase domain containing protein, expressed
Ile	15	QTL_10_08684777	10	76	LOC_Os10g17510	transposon protein, putative, Ac/Ds sub-class
Ile	15	QTL_10_08684777	10	81	LOC_Os10g17520	expressed protein
Ile	15	QTL_10_08684777	10	86	LOC_Os10g17530	retrotransposon protein, putative, unclassified
Ile	15	QTL_10_08684777	10	93	LOC_Os10g17540	retrotransposon protein, putative, unclassified
Ile	15	QTL_10_08684777	10	98	LOC_Os10g17560	retrotransposon protein, putative, Ty3-gypsy subclass
Ile	15	QTL_10_08684777	10	107	LOC_Os10g17570	retrotransposon protein, putative, unclassified
Ile	16	QTL_10_17905052	10	-103	LOC_Os10g33770	importin-beta N-terminal domain containing protein
Ile	16	QTL_10_17905052	10	-98	LOC_Os10g33774	leucoanthocyanidin reductase, putative, expressed
Ile	16	QTL_10_17905052	10	-86	LOC_Os10g33780	DUF640 domain containing protein, putative, expressed
Ile	16	QTL_10_17905052	10	-65	LOC_Os10g33790	expressed protein
Ile	16	QTL_10_17905052	10	-58	LOC_Os10g33800	lactate/malate dehydrogenase, putative, expressed
Ile	16	QTL_10_17905052	10	-49	LOC_Os10g33810	myb-related protein Myb4, putative, expressed
Ile	16	QTL_10_17905052	10	-35	LOC_Os10g33820	expressed protein
Ile	16	QTL_10_17905052	10	-19	LOC_Os10g33830	MATH domain containing protein
Ile	16	QTL_10_17905052	10	-11	LOC_Os10g33840	expressed protein
Ile	16	QTL_10_17905052	10	-8	LOC_Os10g33850	Exo70 exocyst complex subunit family, putative
Ile	16	QTL_10_17905052	10	-4	LOC_Os10g33855	expressed protein
Ile	16	QTL_10_17905052	10	-1	LOC_Os10g33862	expressed protein
Ile	16	QTL_10_17905052	10	4	LOC_Os10g33874	PPR repeat domain containing protein, putative, expressed
Ile	16	QTL_10_17905052	10	9	LOC_Os10g33886	hypothetical protein
Ile	16	QTL_10_17905052	10	24	LOC_Os10g33900	possible lysine decarboxylase domain containing protein, expressed
Ile	16	QTL_10_17905052	10	30	LOC_Os10g33910	mitochondrial import inner membrane translocase subunit Tim16, putative, expressed
Ile	16	QTL_10_17905052	10	35	LOC_Os10g33920	transporter-related, putative, expressed
Ile	16	QTL_10_17905052	10	60	LOC_Os10g33930	DUF1336 domain containing protein, expressed
Ile	16	QTL_10_17905052	10	75	LOC_Os10g33940	auxin response factor 18, putative, expressed
Ile	16	QTL_10_17905052	10	86	LOC_Os10g33950	retrotransposon protein, putative, unclassified
Ile	16	QTL_10_17905052	10	104	LOC_Os10g33954	hypothetical protein
Ile	16	QTL_10_17905052	10	109	LOC_Os10g33960	START domain containing protein, expressed
Ile	17	QTL_11_21411812	11	-114	LOC_Os11g36890	conserved hypothetical protein
Ile	17	QTL_11_21411812	11	-112	LOC_Os11g36900	hypothetical protein
Ile	17	QTL_11_21411812	11	-109	LOC_Os11g36910	hypothetical protein
Ile	17	QTL_11_21411812	11	-95	LOC_Os11g36920	conserved hypothetical protein
Ile	17	QTL_11_21411812	11	-88	LOC_Os11g36930	ZOS11-05 - C2H2 zinc finger protein
Ile	17	QTL_11_21411812	11	-86	LOC_Os11g36940	glucan endo-1,3-beta-glucosidase precursor, putative, expressed
Ile	17	QTL_11_21411812	11	-79	LOC_Os11g36950	T-complex protein 1 subunit theta, putative
Ile	17	QTL_11_21411812	11	-68	LOC_Os11g36960	dnaJ domain containing protein, expressed
Ile	17	QTL_11_21411812	11	-54	LOC_Os11g36970	zinc finger C3HC4 type family protein, putative
Ile	17	QTL_11_21411812	11	-52	LOC_Os11g36980	hypothetical protein
Ile	17	QTL_11_21411812	11	-47	LOC_Os11g36990	transposon protein, putative, CACTA, En/Spm sub-class
Ile	17	QTL_11_21411812	11	-34	LOC_Os11g37000	heat shock protein DnaJ, putative, expressed
Ile	17	QTL_11_21411812	11	-25	LOC_Os11g37010	expressed protein
Ile	17	QTL_11_21411812	11	-23	LOC_Os11g37020	retrotransposon protein, putative, unclassified
Ile	17	QTL_11_21411812	11	-13	LOC_Os11g37040	expressed protein
Ile	17	QTL_11_21411812	11	0	LOC_Os11g37050	expressed protein
Ile	17	QTL_11_21411812	11	3	LOC_Os11g37060	OsFBDUF52 - F-box and DUF domain containing protein, expressed
Ile	17	QTL_11_21411812	11	5	LOC_Os11g37070	expressed protein
Ile	17	QTL_11_21411812	11	12	LOC_Os11g37080	h/ACA ribonucleoprotein complex subunit 1-like protein 1, putative, expressed
Ile	17	QTL_11_21411812	11	14	LOC_Os11g37090	pumilio-family RNA binding repeat domain containing protein, expressed
Ile	17	QTL_11_21411812	11	28	LOC_Os11g37100	expressed protein
Ile	17	QTL_11_21411812	11	31	LOC_Os11g37110	conserved hypothetical protein
Ile	17	QTL_11_21411812	11	34	LOC_Os11g37120	nucleolar protein 5, putative
Ile	17	QTL_11_21411812	11	42	LOC_Os11g37130	mttA/Hcf106 family protein, putative, expressed
Ile	17	QTL_11_21411812	11	47	LOC_Os11g37140	conserved hypothetical protein
Ile	17	QTL_11_21411812	11	57	LOC_Os11g37160	hypothetical protein
Ile	17	QTL_11_21411812	11	66	LOC_Os11g37170	retrotransposon protein, putative, Ty3-gypsy subclass
Ile	17	QTL_11_21411812	11	73	LOC_Os11g37180	retrotransposon protein, putative, Ty3-gypsy subclass
Ile	17	QTL_11_21411812	11	88	LOC_Os11g37190	allergen-related, putative
Ile	17	QTL_11_21411812	11	104	LOC_Os11g37200	transmembrane BAX inhibitor motif-containing protein, putative, expressed
Ile	17	QTL_11_21411812	11	108	LOC_Os11g37210	MTN26L5 - MtN26 family protein precursor, expressed
Ile	17	QTL_11_21411812	11	113	LOC_Os11g37230	zinc finger, C3HC4 type domain containing protein, expressed
Ile	17	QTL_11_21411812	11	120	LOC_Os11g37240	retrotransposon protein, putative, unclassified
Ile	18	QTL_11_22556199	11	-114	LOC_Os11g38630	conserved hypothetical protein
Ile	18	QTL_11_22556199	11	-105	LOC_Os11g38640	expressed protein
Ile	18	QTL_11_22556199	11	-94	LOC_Os11g38650	UDP-glucoronosyl/UDP-glucosyl transferase, putative, expressed
Ile	18	QTL_11_22556199	11	-78	LOC_Os11g38660	transposon protein, putative, CACTA, En/Spm sub-class, expressed
Ile	18	QTL_11_22556199	11	-67	LOC_Os11g38670	DEAD-box ATP-dependent RNA helicase, putative, expressed
Ile	18	QTL_11_22556199	11	-64	LOC_Os11g38680	hypothetical protein
Ile	18	QTL_11_22556199	11	-56	LOC_Os11g38690	transposon protein, putative, CACTA, En/Spm sub-class
Ile	18	QTL_11_22556199	11	-50	LOC_Os11g38700	transposon protein, putative, CACTA, En/Spm sub-class
Ile	18	QTL_11_22556199	11	-48	LOC_Os11g38710	conserved hypothetical protein
Ile	18	QTL_11_22556199	11	-38	LOC_Os11g38720	retrotransposon protein, putative, Ty3-gypsy subclass
Ile	18	QTL_11_22556199	11	-6	LOC_Os11g38750	retrotransposon protein, putative, unclassified
Ile	18	QTL_11_22556199	11	5	LOC_Os11g38760	retrotransposon protein, putative, LINE subclass
Ile	18	QTL_11_22556199	11	30	LOC_Os11g38765	expressed protein
Ile	18	QTL_11_22556199	11	38	LOC_Os11g38780	EF hand family protein, putative
Ile	18	QTL_11_22556199	11	41	LOC_Os11g38790	expressed protein
Ile	18	QTL_11_22556199	11	43	LOC_Os11g38800	zinc finger family protein, putative, expressed
Ile	18	QTL_11_22556199	11	55	LOC_Os11g38810	mannose-6-phosphate isomerase, putative, expressed
Ile	18	QTL_11_22556199	11	68	LOC_Os11g38820	retrotransposon protein, putative, Ty3-gypsy subclass, expressed
Ile	18	QTL_11_22556199	11	74	LOC_Os11g38830	PE-PGRS family protein, putative
Ile	18	QTL_11_22556199	11	81	LOC_Os11g38840	hypothetical protein
Ile	18	QTL_11_22556199	11	97	LOC_Os11g38850	TKL_IRAK_DUF26-la.7 - DUF26 kinases have homology to DUF26 containing loci
Ile	18	QTL_11_22556199	11	106	LOC_Os11g38860	methyltransferase, putative, expressed
Ile	18	QTL_11_22556199	11	109	LOC_Os11g38870	helix-loop-helix DNA-binding domain containing protein, expressed
Ile	18	QTL_11_22556199	11	118	LOC_Os11g38880	hypothetical protein
Ile	19	QTL_11_27910501	11	-105	LOC_Os11g47110	OsWAK121 - OsWAK receptor-like protein kinase
Ile	19	QTL_11_27910501	11	-95	LOC_Os11g47120	DEFL48 - Defensin and Defensin-like DEFL family, expressed
Ile	19	QTL_11_27910501	11	-85	LOC_Os11g47130	protein transporter, putative, expressed
Ile	19	QTL_11_27910501	11	-70	LOC_Os11g47140	OsWAK123 - OsWAK receptor-like protein kinase, expressed
Ile	19	QTL_11_27910501	11	-63	LOC_Os11g47150	OsWAK122 - OsWAK receptor-like protein kinase
Ile	19	QTL_11_27910501	11	-59	LOC_Os11g47160	receptor kinase 1, putative
Ile	19	QTL_11_27910501	11	-58	LOC_Os11g47170	receptor-like protein kinase precursor, putative
Ile	19	QTL_11_27910501	11	-53	LOC_Os11g47180	receptor-like protein kinase 2 precursor, putative, expressed
Ile	19	QTL_11_27910501	11	-43	LOC_Os11g47190	transposon protein, putative, unclassified
Ile	19	QTL_11_27910501	11	-39	LOC_Os11g47200	transposon protein, putative, unclassified
Ile	19	QTL_11_27910501	11	-30	LOC_Os11g47210	receptor-like protein kinase 5 precursor, putative
Ile	19	QTL_11_27910501	11	-28	LOC_Os11g47220	retrotransposon protein, putative, LINE subclass
Ile	19	QTL_11_27910501	11	-27	LOC_Os11g47229	hypothetical protein
Ile	19	QTL_11_27910501	11	-22	LOC_Os11g47240	leucine-rich repeat receptor protein kinase EXS precursor, putative, expressed
Ile	19	QTL_11_27910501	11	-15	LOC_Os11g47250	retrotransposon protein, putative, unclassified
Ile	19	QTL_11_27910501	11	-9	LOC_Os11g47260	retrotransposon protein, putative, unclassified
Ile	19	QTL_11_27910501	11	-4	LOC_Os11g47269	DEFL44 - Defensin and Defensin-like DEFL family
Ile	19	QTL_11_27910501	11	-2	LOC_Os11g47278	expressed protein
Ile	19	QTL_11_27910501	11	10	LOC_Os11g47300	receptor-like protein kinase precursor, putative
Ile	19	QTL_11_27910501	11	17	LOC_Os11g47310	receptor kinase-like protein, identical, putative, expressed
Ile	19	QTL_11_27910501	11	28	LOC_Os11g47320	protein transporter, putative, expressed
Ile	19	QTL_11_27910501	11	40	LOC_Os11g47330	ATP-grasp domain containing protein, expressed
Ile	19	QTL_11_27910501	11	49	LOC_Os11g47350	beta-D-xylosidase, putative
Ile	19	QTL_11_27910501	11	57	LOC_Os11g47360	retrotransposon protein, putative, Ty3-gypsy subclass
Ile	19	QTL_11_27910501	11	62	LOC_Os11g47370	expressed protein
Ile	19	QTL_11_27910501	11	74	LOC_Os11g47390	laccase precursor protein, putative, expressed
Ile	19	QTL_11_27910501	11	81	LOC_Os11g47400	hypothetical protein
Ile	19	QTL_11_27910501	11	83	LOC_Os11g47410	retrotransposon protein, putative, unclassified
Ile	19	QTL_11_27910501	11	88	LOC_Os11g47420	retrotransposon protein, putative, unclassified
Ile	19	QTL_11_27910501	11	92	LOC_Os11g47430	retrotransposon protein, putative, unclassified
Ile	19	QTL_11_27910501	11	108	LOC_Os11g47432	zinc knuckle family protein
Ile	19	QTL_11_27910501	11	101	LOC_Os11g47453	expressed protein
Ile	20	QTL_12_07716974	12	-119	LOC_Os12g13540	hypothetical protein
Ile	20	QTL_12_07716974	12	-112	LOC_Os12g13550	NBS-LRR disease resistance protein, putative, expressed
Ile	20	QTL_12_07716974	12	-108	LOC_Os12g13560	hypothetical protein
Ile	20	QTL_12_07716974	12	-99	LOC_Os12g13570	MYB family transcription factor, putative, expressed
Ile	20	QTL_12_07716974	12	-94	LOC_Os12g13580	hypothetical protein
Ile	20	QTL_12_07716974	12	-75	LOC_Os12g13590	exocyst complex component 5, putative, expressed
Ile	20	QTL_12_07716974	12	-71	LOC_Os12g13600	expressed protein
Ile	20	QTL_12_07716974	12	-69	LOC_Os12g13610	CHIT9 - Chitinase family protein precursor, putative, expressed
Ile	20	QTL_12_07716974	12	-61	LOC_Os12g13620	retrotransposon protein, putative, unclassified
Ile	20	QTL_12_07716974	12	-55	LOC_Os12g13630	hypothetical protein
Ile	20	QTL_12_07716974	12	-49	LOC_Os12g13640	glycosyltransferase, putative, expressed
Ile	20	QTL_12_07716974	12	-42	LOC_Os12g13650	hypothetical protein
Ile	20	QTL_12_07716974	12	-33	LOC_Os12g13660	expressed protein
Ile	20	QTL_12_07716974	12	-20	LOC_Os12g13670	expressed protein
Ile	20	QTL_12_07716974	12	-8	LOC_Os12g13674	expressed protein
Ile	20	QTL_12_07716974	12	0	LOC_Os12g13680	hypothetical protein
Ile	20	QTL_12_07716974	12	0	LOC_Os12g13690	hypothetical protein
Ile	20	QTL_12_07716974	12	4	LOC_Os12g13700	hypothetical protein
Ile	20	QTL_12_07716974	12	8	LOC_Os12g13710	hypothetical protein
Ile	20	QTL_12_07716974	12	12	LOC_Os12g13720	Plant PDR ABC transporter associated domain containing protein, expressed
Ile	20	QTL_12_07716974	12	28	LOC_Os12g13730	pleiotropic drug resistance protein 2, putative, expressed
Ile	20	QTL_12_07716974	12	33	LOC_Os12g13740	hypothetical protein
Ile	20	QTL_12_07716974	12	36	LOC_Os12g13750	retrotransposon protein, putative, unclassified
Ile	20	QTL_12_07716974	12	43	LOC_Os12g13760	hypothetical protein
Ile	20	QTL_12_07716974	12	57	LOC_Os12g13770	retrotransposon protein, putative, Ty3-gypsy subclass
Ile	20	QTL_12_07716974	12	69	LOC_Os12g13780	retrotransposon protein, putative, Ty1-copia subclass
Ile	20	QTL_12_07716974	12	75	LOC_Os12g13790	POT family protein
Ile	20	QTL_12_07716974	12	82	LOC_Os12g13800	O-methyltransferase, putative, expressed
Ile	20	QTL_12_07716974	12	86	LOC_Os12g13810	caffeic acid 3-O-methyltransferase, putative
Ile	20	QTL_12_07716974	12	100	LOC_Os12g13824	expressed protein
Ile	20	QTL_12_07716974	12	112	LOC_Os12g13840	retrotransposon protein, putative, unclassified
Ile	20	QTL_12_07716974	12	114	LOC_Os12g13850	hypothetical protein
Arg	1	QTL_02_20293741	2	-117	LOC_Os02g33850	elongation factor Tu family protein, putative, expressed
Arg	1	QTL_02_20293741	2	-113	LOC_Os02g33860	WD domain, G-beta repeat domain containing protein, expressed
Arg	1	QTL_02_20293741	2	-110	LOC_Os02g33870	retrotransposon protein, putative, Ty3-gypsy subclass
Arg	1	QTL_02_20293741	2	-105	LOC_Os02g33880	retrotransposon protein, putative, Ty3-gypsy subclass
Arg	1	QTL_02_20293741	2	-101	LOC_Os02g33890	hypothetical protein
Arg	1	QTL_02_20293741	2	-94	LOC_Os02g33900	transposon protein, putative, unclassified
Arg	1	QTL_02_20293741	2	-86	LOC_Os02g33910	retrotransposon protein, putative, Ty3-gypsy subclass
Arg	1	QTL_02_20293741	2	-81	LOC_Os02g33920	transposon protein, putative, unclassified
Arg	1	QTL_02_20293741	2	-75	LOC_Os02g33930	conserved hypothetical protein
Arg	1	QTL_02_20293741	2	-64	LOC_Os02g33944	transposon protein, putative, CACTA, En/Spm sub-class, expressed
Arg	1	QTL_02_20293741	2	-58	LOC_Os02g33960	retrotransposon protein, putative, Ty1-copia subclass
Arg	1	QTL_02_20293741	2	-56	LOC_Os02g33970	retrotransposon protein, putative, Ty1-copia subclass
Arg	1	QTL_02_20293741	2	-41	LOC_Os02g33980	hypothetical protein
Arg	1	QTL_02_20293741	2	-7	LOC_Os02g33990	transposon protein, putative, CACTA, En/Spm sub-class
Arg	1	QTL_02_20293741	2	-2	LOC_Os02g34000	transposon protein, putative, CACTA, En/Spm sub-class
Arg	1	QTL_02_20293741	2	11	LOC_Os02g34010	transposon protein, putative, CACTA, En/Spm sub-class
Arg	1	QTL_02_20293741	2	19	LOC_Os02g34020	transposon protein, putative, CACTA, En/Spm sub-class
Arg	1	QTL_02_20293741	2	23	LOC_Os02g34030	retrotransposon protein, putative, unclassified
Arg	1	QTL_02_20293741	2	38	LOC_Os02g34040	retrotransposon protein, putative, Ty1-copia subclass
Arg	1	QTL_02_20293741	2	54	LOC_Os02g34060	hypothetical protein
Arg	1	QTL_02_20293741	2	66	LOC_Os02g34070	hypothetical protein
Arg	1	QTL_02_20293741	2	69	LOC_Os02g34080	myosin, putative, expressed
Arg	1	QTL_02_20293741	2	93	LOC_Os02g34090	hypothetical protein
Arg	1	QTL_02_20293741	2	97	LOC_Os02g34100	hypothetical protein
Arg	1	QTL_02_20293741	2	108	LOC_Os02g34120	expressed protein
Arg	1	QTL_02_20293741	2	113	LOC_Os02g34130	transposon protein, putative, CACTA, En/Spm sub-class
Arg	1	QTL_02_20293741	2	117	LOC_Os02g34140	hypothetical protein
Arg	2	QTL_05_08130390	5	-112	LOC_Os05g14270	expressed protein
Arg	2	QTL_05_08130390	5	-109	LOC_Os05g14280	RNA-directed DNA polymerase, putative
Arg	2	QTL_05_08130390	5	-101	LOC_Os05g14290	hypothetical protein
Arg	2	QTL_05_08130390	5	-90	LOC_Os05g14300	ubiquitin-conjugating enzyme E2 O, putative, expressed
Arg	2	QTL_05_08130390	5	-82	LOC_Os05g14310	expressed protein
Arg	2	QTL_05_08130390	5	-73	LOC_Os05g14320	transposon protein, putative, unclassified, expressed
Arg	2	QTL_05_08130390	5	-66	LOC_Os05g14330	retrotransposon protein, putative, unclassified
Arg	2	QTL_05_08130390	5	-58	LOC_Os05g14340	retrotransposon protein, putative, unclassified
Arg	2	QTL_05_08130390	5	-54	LOC_Os05g14350	retrotransposon protein, putative, unclassified
Arg	2	QTL_05_08130390	5	-48	LOC_Os05g14360	expressed protein
Arg	2	QTL_05_08130390	5	-41	LOC_Os05g14370	WRKY DNA-binding domain containing protein, expressed
Arg	2	QTL_05_08130390	5	-26	LOC_Os05g14380	retrotransposon protein, putative, unclassified
Arg	2	QTL_05_08130390	5	-23	LOC_Os05g14390	hypothetical protein
Arg	2	QTL_05_08130390	5	-12	LOC_Os05g14400	retrotransposon protein, putative, unclassified
Arg	2	QTL_05_08130390	5	-3	LOC_Os05g14410	transposon protein, putative, CACTA, En/Spm sub-class
Arg	2	QTL_05_08130390	5	10	LOC_Os05g14430	retrotransposon protein, putative, unclassified
Arg	2	QTL_05_08130390	5	14	LOC_Os05g14440	transposon protein, putative, Ac/Ds sub-class
Arg	2	QTL_05_08130390	5	30	LOC_Os05g14450	transposon protein, putative, CACTA, En/Spm sub-class
Arg	2	QTL_05_08130390	5	36	LOC_Os05g14460	transposon protein, putative, CACTA, En/Spm sub-class
Arg	2	QTL_05_08130390	5	43	LOC_Os05g14470	hypothetical protein
Arg	2	QTL_05_08130390	5	46	LOC_Os05g14480	conserved hypothetical protein
Arg	2	QTL_05_08130390	5	50	LOC_Os05g14490	hypothetical protein
Arg	2	QTL_05_08130390	5	65	LOC_Os05g14500	conserved hypothetical protein
Arg	2	QTL_05_08130390	5	74	LOC_Os05g14510	retrotransposon protein, putative, unclassified
Arg	2	QTL_05_08130390	5	86	LOC_Os05g14520	retrotransposon protein, putative, unclassified
Arg	2	QTL_05_08130390	5	105	LOC_Os05g14530	retrotransposon protein, putative, unclassified
Arg	2	QTL_05_08130390	5	116	LOC_Os05g14540	hypothetical protein
Arg	3	QTL_05_28394307	5	-111	LOC_Os05g49430	aldose 1-epimerase, putative, expressed
Arg	3	QTL_05_28394307	5	-108	LOC_Os05g49440	DUF1264 domain containing protein, putative, expressed
Arg	3	QTL_05_28394307	5	-106	LOC_Os05g49450	OsFBX177 - F-box domain containing protein, expressed
Arg	3	QTL_05_28394307	5	-100	LOC_Os05g49460	CTP synthase, putative
Arg	3	QTL_05_28394307	5	-97	LOC_Os05g49470	THO complex subunit 7, putative, expressed
Arg	3	QTL_05_28394307	5	-95	LOC_Os05g49480	transcription factor-related, putative, expressed
Arg	3	QTL_05_28394307	5	-78	LOC_Os05g49490	hypothetical protein
Arg	3	QTL_05_28394307	5	-70	LOC_Os05g49500	hypothetical protein
Arg	3	QTL_05_28394307	5	-66	LOC_Os05g49510	expressed protein
Arg	3	QTL_05_28394307	5	-59	LOC_Os05g49520	CTP synthase, putative
Arg	3	QTL_05_28394307	5	-55	LOC_Os05g49530	F-box domain containing protein
Arg	3	QTL_05_28394307	5	-39	LOC_Os05g49540	retrotransposon protein, putative, Ty1-copia subclass
Arg	3	QTL_05_28394307	5	-32	LOC_Os05g49550	retrotransposon protein, putative, Ty1-copia subclass
Arg	3	QTL_05_28394307	5	-26	LOC_Os05g49560	retrotransposon protein, putative, unclassified
Arg	3	QTL_05_28394307	5	-21	LOC_Os05g49570	retrotransposon protein, putative, unclassified
Arg	3	QTL_05_28394307	5	-12	LOC_Os05g49580	plastocyanin-like domain containing protein, putative, expressed
Arg	3	QTL_05_28394307	5	-4	LOC_Os05g49590	suppressor of phythchrome A, putative, expressed
Arg	3	QTL_05_28394307	5	7	LOC_Os05g49610	ubiquitin carboxyl-terminal hydrolase, family 1, putative, expressed
Arg	3	QTL_05_28394307	5	14	LOC_Os05g49620	OsWRKY19 - Superfamily of TFs having WRKY and zinc finger domains, expressed
Arg	3	QTL_05_28394307	5	16	LOC_Os05g49630	expressed protein
Arg	3	QTL_05_28394307	5	21	LOC_Os05g49640	expressed protein
Arg	3	QTL_05_28394307	5	23	LOC_Os05g49650	expressed protein
Arg	3	QTL_05_28394307	5	29	LOC_Os05g49660	hypothetical protein
Arg	3	QTL_05_28394307	5	30	LOC_Os05g49670	expressed protein
Arg	3	QTL_05_28394307	5	32	LOC_Os05g49680	OsFBX178 - F-box domain containing protein, expressed
Arg	3	QTL_05_28394307	5	37	LOC_Os05g49684	hypothetical protein
Arg	3	QTL_05_28394307	5	40	LOC_Os05g49690	hypothetical protein
Arg	3	QTL_05_28394307	5	42	LOC_Os05g49700	AP2 domain containing protein, expressed
Arg	3	QTL_05_28394307	5	46	LOC_Os05g49710	retrotransposon protein, putative, unclassified
Arg	3	QTL_05_28394307	5	53	LOC_Os05g49720	retrotransposon protein, putative, unclassified
Arg	3	QTL_05_28394307	5	66	LOC_Os05g49730	protein phosphatase 2C, putative, expressed
Arg	3	QTL_05_28394307	5	77	LOC_Os05g49740	EMB2744, putative, expressed
Arg	3	QTL_05_28394307	5	82	LOC_Os05g49750	expressed protein
Arg	3	QTL_05_28394307	5	90	LOC_Os05g49760	dehydrogenase, putative, expressed
Arg	3	QTL_05_28394307	5	94	LOC_Os05g49770	CTP synthase, putative, expressed
Arg	3	QTL_05_28394307	5	115	LOC_Os05g49780	histone-like transcription factor and archaeal histone, putative, expressed
Arg	3	QTL_05_28394307	5	121	LOC_Os05g49790	DUF538 domain containing protein, putative, expressed
Arg	4	QTL_06_26090111	6	-110	LOC_Os06g43220	AP2 domain containing protein, expressed
Arg	4	QTL_06_26090111	6	-105	LOC_Os06g43230	hypothetical protein
Arg	4	QTL_06_26090111	6	-101	LOC_Os06g43240	transposon protein, putative, unclassified
Arg	4	QTL_06_26090111	6	-97	LOC_Os06g43250	expressed protein
Arg	4	QTL_06_26090111	6	-95	LOC_Os06g43260	hypothetical protein
Arg	4	QTL_06_26090111	6	-84	LOC_Os06g43270	protein kinase domain containing protein, expressed
Arg	4	QTL_06_26090111	6	-80	LOC_Os06g43280	paxneb-related protein, putative, expressed
Arg	4	QTL_06_26090111	6	-74	LOC_Os06g43290	retrotransposon protein, putative, Ty1-copia subclass
Arg	4	QTL_06_26090111	6	-61	LOC_Os06g43304	cytochrome P450, putative, expressed
Arg	4	QTL_06_26090111	6	-52	LOC_Os06g43320	cytochrome P450, putative, expressed
Arg	4	QTL_06_26090111	6	-40	LOC_Os06g43330	retrotransposon protein, putative, unclassified
Arg	4	QTL_06_26090111	6	-33	LOC_Os06g43340	retrotransposon protein, putative, unclassified
Arg	4	QTL_06_26090111	6	-25	LOC_Os06g43350	cytochrome P450, putative, expressed
Arg	4	QTL_06_26090111	6	-21	LOC_Os06g43360	hypothetical protein
Arg	4	QTL_06_26090111	6	-16	LOC_Os06g43370	cytochrome P450, putative, expressed
Arg	4	QTL_06_26090111	6	-4	LOC_Os06g43384	cytochrome P450, putative, expressed
Arg	4	QTL_06_26090111	6	0	LOC_Os06g43400	tabersonine 16-hydroxylase, putative
Arg	4	QTL_06_26090111	6	1	LOC_Os06g43410	cytochrome P450, putative, expressed
Arg	4	QTL_06_26090111	6	6	LOC_Os06g43420	cytochrome P450, putative, expressed
Arg	4	QTL_06_26090111	6	13	LOC_Os06g43430	cytochrome P450, putative, expressed
Arg	4	QTL_06_26090111	6	17	LOC_Os06g43440	cytochrome P450, putative, expressed
Arg	4	QTL_06_26090111	6	20	LOC_Os06g43450	retrotransposon protein, putative, unclassified
Arg	4	QTL_06_26090111	6	23	LOC_Os06g43460	retrotransposon protein, putative, unclassified
Arg	4	QTL_06_26090111	6	32	LOC_Os06g43470	cytochrome P450 71A9, putative
Arg	4	QTL_06_26090111	6	45	LOC_Os06g43480	cytochrome P450, putative
Arg	4	QTL_06_26090111	6	54	LOC_Os06g43490	cytochrome P450, putative
Arg	4	QTL_06_26090111	6	63	LOC_Os06g43500	hypothetical protein
Arg	4	QTL_06_26090111	6	64	LOC_Os06g43510	cytochrome P450 71D6, putative, expressed
Arg	4	QTL_06_26090111	6	68	LOC_Os06g43520	cytochrome P450 71D7, putative, expressed
Arg	4	QTL_06_26090111	6	81	LOC_Os06g43530	hypothetical protein
Arg	4	QTL_06_26090111	6	85	LOC_Os06g43540	retrotransposon protein, putative, unclassified, expressed
Arg	4	QTL_06_26090111	6	92	LOC_Os06g43550	expressed protein
Arg	4	QTL_06_26090111	6	98	LOC_Os06g43560	phox domain-containing protein, putative, expressed
Arg	4	QTL_06_26090111	6	108	LOC_Os06g43570	peptidase, T1 family, putative, expressed
Arg	4	QTL_06_26090111	6	117	LOC_Os06g43580	hypothetical protein
Arg	5	QTL_08_00953534	8	-95	LOC_Os08g02300	no apical meristem protein, putative, expressed
Arg	5	QTL_08_00953534	8	-71	LOC_Os08g02310	retrotransposon protein, putative, unclassified
Arg	5	QTL_08_00953534	8	-64	LOC_Os08g02320	hypothetical protein
Arg	5	QTL_08_00953534	8	-55	LOC_Os08g02330	RNA recognition motif containing protein, putative, expressed
Arg	5	QTL_08_00953534	8	-48	LOC_Os08g02340	60S acidic ribosomal protein, putative, expressed
Arg	5	QTL_08_00953534	8	-31	LOC_Os08g02350	expressed protein
Arg	5	QTL_08_00953534	8	-19	LOC_Os08g02354	expressed protein
Arg	5	QTL_08_00953534	8	-14	LOC_Os08g02360	exosome complex exonuclease, putative, expressed
Arg	5	QTL_08_00953534	8	-10	LOC_Os08g02370	galactosyltransferase family protein, putative, expressed
Arg	5	QTL_08_00953534	8	-1	LOC_Os08g02380	kinesin motor domain containing protein, putative, expressed
Arg	5	QTL_08_00953534	8	1	LOC_Os08g02400	40S ribosomal protein S13, putative, expressed
Arg	5	QTL_08_00953534	8	8	LOC_Os08g02410	40S ribosomal protein S13, putative, expressed
Arg	5	QTL_08_00953534	8	14	LOC_Os08g02420	OsCML7 - Calmodulin-related calcium sensor protein, expressed
Arg	5	QTL_08_00953534	8	16	LOC_Os08g02430	hypothetical protein
Arg	5	QTL_08_00953534	8	19	LOC_Os08g02440	expressed protein
Arg	5	QTL_08_00953534	8	26	LOC_Os08g02450	ATCHX, putative, expressed
Arg	5	QTL_08_00953534	8	29	LOC_Os08g02460	expressed protein
Arg	5	QTL_08_00953534	8	39	LOC_Os08g02470	retrotransposon protein, putative, unclassified
Arg	5	QTL_08_00953534	8	47	LOC_Os08g02480	retrotransposon protein, putative, unclassified
Arg	5	QTL_08_00953534	8	52	LOC_Os08g02490	AT hook motif domain containing protein, expressed
Arg	5	QTL_08_00953534	8	60	LOC_Os08g02500	ACT domain containing protein, putative
Arg	5	QTL_08_00953534	8	85	LOC_Os08g02520	OsSAUR31 - Auxin-responsive SAUR gene family member, expressed
Arg	5	QTL_08_00953534	8	91	LOC_Os08g02530	OsSAUR32 - Auxin-responsive SAUR gene family member
Arg	5	QTL_08_00953534	8	92	LOC_Os08g02540	adenylate kinase, putative, expressed
Arg	5	QTL_08_00953534	8	96	LOC_Os08g02550	proteasome subunit, putative, expressed
Arg	5	QTL_08_00953534	8	101	LOC_Os08g02560	DUF1517 domain containing protein, putative
Arg	5	QTL_08_00953534	8	107	LOC_Os08g02570	DUF1517 domain containing protein, putative
Arg	5	QTL_08_00953534	8	114	LOC_Os08g02580	conserved hypothetical protein
Arg	5	QTL_08_00953534	8	119	LOC_Os08g02590	conserved hypothetical protein
Arg	5	QTL_08_00953534	8	120	LOC_Os08g02600	methyltransferase domain containing protein, expressed
Arg	6	QTL_08_16289400	8	-112	LOC_Os08g26580	hypothetical protein
Arg	6	QTL_08_16289400	8	-110	LOC_Os08g26590	hypothetical protein
Arg	6	QTL_08_16289400	8	-107	LOC_Os08g26600	hypothetical protein
Arg	6	QTL_08_16289400	8	-105	LOC_Os08g26610	retrotransposon protein, putative, unclassified
Arg	6	QTL_08_16289400	8	-98	LOC_Os08g26620	hypothetical protein
Arg	6	QTL_08_16289400	8	-97	LOC_Os08g26630	hypothetical protein
Arg	6	QTL_08_16289400	8	-88	LOC_Os08g26650	retrotransposon, putative, centromere-specific
Arg	6	QTL_08_16289400	8	-85	LOC_Os08g26660	retrotransposon, putative, centromere-specific
Arg	6	QTL_08_16289400	8	-81	LOC_Os08g26670	hypothetical protein
Arg	6	QTL_08_16289400	8	-79	LOC_Os08g26680	hypothetical protein
Arg	6	QTL_08_16289400	8	-71	LOC_Os08g26685	glycerol 3-phosphate permease, putative
Arg	6	QTL_08_16289400	8	-59	LOC_Os08g26690	retrotransposon protein, putative, Ty1-copia subclass
Arg	6	QTL_08_16289400	8	-51	LOC_Os08g26700	expressed protein
Arg	6	QTL_08_16289400	8	-44	LOC_Os08g26710	plant protein of unknown function domain containing protein, expressed
Arg	6	QTL_08_16289400	8	-38	LOC_Os08g26720	hypothetical protein
Arg	6	QTL_08_16289400	8	-30	LOC_Os08g26730	retrotransposon protein, putative, unclassified
Arg	6	QTL_08_16289400	8	-24	LOC_Os08g26740	retrotransposon protein, putative, Ty3-gypsy subclass
Arg	6	QTL_08_16289400	8	-20	LOC_Os08g26750	retrotransposon protein, putative, Ty3-gypsy subclass
Arg	6	QTL_08_16289400	8	-17	LOC_Os08g26760	retrotransposon protein, putative, unclassified
Arg	6	QTL_08_16289400	8	-15	LOC_Os08g26770	retrotransposon protein, putative, unclassified
Arg	6	QTL_08_16289400	8	-14	LOC_Os08g26780	retrotransposon protein, putative, unclassified
Arg	6	QTL_08_16289400	8	-12	LOC_Os08g26790	retrotransposon protein, putative, unclassified
Arg	6	QTL_08_16289400	8	-8	LOC_Os08g26800	retrotransposon protein, putative, Ty3-gypsy subclass
Arg	6	QTL_08_16289400	8	10	LOC_Os08g26810	hypothetical protein
Arg	6	QTL_08_16289400	8	15	LOC_Os08g26820	plant protein of unknown function domain containing protein, expressed
Arg	6	QTL_08_16289400	8	21	LOC_Os08g26830	hypothetical protein
Arg	6	QTL_08_16289400	8	27	LOC_Os08g26840	plant protein of unknown function domain containing protein, expressed
Arg	6	QTL_08_16289400	8	39	LOC_Os08g26850	plant protein of unknown function domain containing protein, expressed
Arg	6	QTL_08_16289400	8	45	LOC_Os08g26860	hypothetical protein
Arg	6	QTL_08_16289400	8	48	LOC_Os08g26870	wound responsive protein, putative, expressed
Arg	6	QTL_08_16289400	8	62	LOC_Os08g26875	expressed protein
Arg	6	QTL_08_16289400	8	79	LOC_Os08g26880	bZIP transcription factor domain containing protein, expressed
Arg	6	QTL_08_16289400	8	96	LOC_Os08g26890	conserved hypothetical protein
Arg	6	QTL_08_16289400	8	112	LOC_Os08g26900	retrotransposon protein, putative, Ty3-gypsy subclass
Arg	7	QTL_09_16065720	9	-103	LOC_Os09g26420	AP2 domain containing protein, expressed
Arg	7	QTL_09_16065720	9	-86	LOC_Os09g26430	retrotransposon protein, putative, unclassified
Arg	7	QTL_09_16065720	9	-85	LOC_Os09g26440	expressed protein
Arg	7	QTL_09_16065720	9	-75	LOC_Os09g26460	protein binding protein, putative, expressed
Arg	7	QTL_09_16065720	9	-69	LOC_Os09g26470	zinc finger, C3HC4 type family protein, expressed
Arg	7	QTL_09_16065720	9	-63	LOC_Os09g26480	conserved hypothetical protein
Arg	7	QTL_09_16065720	9	-55	LOC_Os09g26490	alpha/beta hydrolase fold, putative
Arg	7	QTL_09_16065720	9	-51	LOC_Os09g26500	CXE carboxylesterase, putative, expressed
Arg	7	QTL_09_16065720	9	-48	LOC_Os09g26510	conserved hypothetical protein
Arg	7	QTL_09_16065720	9	-38	LOC_Os09g26520	hypothetical protein
Arg	7	QTL_09_16065720	9	-31	LOC_Os09g26530	expressed protein
Arg	7	QTL_09_16065720	9	-21	LOC_Os09g26540	expressed protein
Arg	7	QTL_09_16065720	9	-7	LOC_Os09g26550	protease Do-like 14, putative, expressed
Arg	7	QTL_09_16065720	9	8	LOC_Os09g26554	expressed protein
Arg	7	QTL_09_16065720	9	12	LOC_Os09g26560	expressed protein
[truncated: 1,032 more rows]

## Sheet: Supplementary Table 4
Supplementary Table 4 | Haplotype and content analysis of potential candidate genes for five FAA content datasets.
Trait	Acc id	Subpopulation	MSU locus	Haplotype	Content
Val	C001	Ind	LOC_Os01g19220	GGAA	24.75
Val	C003	Jap	LOC_Os01g19220	AAGG	23.68
Val	C004	Jap	LOC_Os01g19220	AAGG	23.23
Val	C005	Jap	LOC_Os01g19220	AAGG	24.23
Val	C006	Ind	LOC_Os01g19220	GGAA	23.34
Val	C007	Ind	LOC_Os01g19220	GGAA	23.43
Val	C008	Ind	LOC_Os01g19220	GGAA	23.5
Val	C009	Ind	LOC_Os01g19220	GGGG	23.81
Val	C010	Jap	LOC_Os01g19220	AAGG	23.75
Val	C011	Ind	LOC_Os01g19220	GGGG	23.19
Val	C012	Jap	LOC_Os01g19220	AAGG	23.72
Val	C014	Jap	LOC_Os01g19220	AAGG	23.59
Val	C016	Jap	LOC_Os01g19220	AAGG	23.38
Val	C017	Jap	LOC_Os01g19220	AAGG	23.28
Val	C018	Jap	LOC_Os01g19220	AAGG	23.16
Val	C019	Ind	LOC_Os01g19220	GGGG	23.66
Val	C020	Ind	LOC_Os01g19220	GGGG	23.43
Val	C021	Ind	LOC_Os01g19220	GGGG	22.84
Val	C022	Ind	LOC_Os01g19220	GGAA	22.67
Val	C023	Jap	LOC_Os01g19220	AAGG	23.48
Val	C024	Ind	LOC_Os01g19220	GGAA	23.22
Val	C025	Ind	LOC_Os01g19220	GGGG	22.89
Val	C026	Jap	LOC_Os01g19220	AAGG	23.38
Val	C027	Ind	LOC_Os01g19220	GGGG	23.73
Val	C028	Jap	LOC_Os01g19220	AAGG	23.04
Val	C029	Jap	LOC_Os01g19220	GGGG	23.32
Val	C030	Ind	LOC_Os01g19220	GGAA	23.03
Val	C031	Ind	LOC_Os01g19220	GGAA	24.51
Val	C032	Jap	LOC_Os01g19220	AAGG	23.17
Val	C033	Ind	LOC_Os01g19220	GGAA	24.12
Val	C034	Jap	LOC_Os01g19220	AAGG	23.85
Val	C035	Jap	LOC_Os01g19220	AAGG	23.95
Val	C036	Ind	LOC_Os01g19220	GGGG	24.23
Val	C037	Ind	LOC_Os01g19220	GGGG	24.33
Val	C038	Ind	LOC_Os01g19220	GGAA	24.16
Val	C039	Ind	LOC_Os01g19220	GGGG	24.69
Val	C040	Ind	LOC_Os01g19220	GGGG	24.3
Val	C041	Ind	LOC_Os01g19220	GGGG	24.36
Val	C042	Ind	LOC_Os01g19220	GGGG	24.36
Val	C043	Ind	LOC_Os01g19220	GGGG	23.79
Val	C044	Ind	LOC_Os01g19220	GGGG	24.38
Val	C045	Ind	LOC_Os01g19220	GGAA	24.03
Val	C046	Ind	LOC_Os01g19220	GGAA	24.04
Val	C047	Ind	LOC_Os01g19220	GGGG	23.92
Val	C048	Jap	LOC_Os01g19220	AAGG	24.4
Val	C049	Ind	LOC_Os01g19220	GGAA	23.5
Val	C050	Ind	LOC_Os01g19220	GGAA	23.66
Val	C052	Jap	LOC_Os01g19220	AAGG	24.71
Val	C053	Ind	LOC_Os01g19220	GGGG	23.75
Val	C054	Jap	LOC_Os01g19220	AAGG	24.65
Val	C055	Ind	LOC_Os01g19220	GGGG	24.84
Val	C056	Jap	LOC_Os01g19220	AAGG	24.19
Val	C057	Jap	LOC_Os01g19220	AAGG	24.45
Val	C058	Ind	LOC_Os01g19220	GGGG	24.22
Val	C059	Ind	LOC_Os01g19220	GGAA	24.43
Val	C060	Ind	LOC_Os01g19220	GGGG	24.05
Val	C061	Ind	LOC_Os01g19220	GGAA	24.25
Val	C062	Ind	LOC_Os01g19220	GGGG	24.49
Val	C063	Jap	LOC_Os01g19220	AAGG	25.24
Val	C064	Jap	LOC_Os01g19220	AAGG	24.84
Val	C065	Ind	LOC_Os01g19220	GGGG	24.09
Val	C066	Ind	LOC_Os01g19220	GGAA	24.52
Val	C067	Jap	LOC_Os01g19220	AAGG	24.55
Val	C068	Ind	LOC_Os01g19220	GGGG	24.24
Val	C069	Ind	LOC_Os01g19220	GGAA	24.46
Val	C070	Jap	LOC_Os01g19220	AAGG	24.58
Val	C071	Jap	LOC_Os01g19220	AAGG	24.1
Val	C072	Ind	LOC_Os01g19220	GGGG	23.54
Val	C073	Ind	LOC_Os01g19220	GGAA	23.28
Val	C074	Jap	LOC_Os01g19220	AAGG	24.72
Val	C075	Jap	LOC_Os01g19220	AAGG	24.2
Val	C076	Ind	LOC_Os01g19220	GGGG	23.68
Val	C077	Ind	LOC_Os01g19220	GGGG	23.64
Val	C078	Ind	LOC_Os01g19220	GGGG	24.13
Val	C079	Jap	LOC_Os01g19220	AAGG	23.96
Val	C080	Ind	LOC_Os01g19220	GGGG	23.62
Val	C081	Ind	LOC_Os01g19220	GGGG	23.65
Val	C082	Jap	LOC_Os01g19220	AAGG	23.7
Val	C083	Jap	LOC_Os01g19220	AAGG	23.66
Val	C085	Jap	LOC_Os01g19220	AAGG	24.3
Val	C087	Jap	LOC_Os01g19220	AAGG	24.08
Val	C088	Ind	LOC_Os01g19220	GGGG	24.25
Val	C089	Jap	LOC_Os01g19220	AAGG	23.61
Val	C090	Ind	LOC_Os01g19220	GGAA	23.5
Val	C091	Ind	LOC_Os01g19220	GGAA	24.11
Val	C092	Ind	LOC_Os01g19220	GGAA	24.4
Val	C093	Jap	LOC_Os01g19220	AAGG	24.76
Val	C094	Ind	LOC_Os01g19220	GGGG	23.96
Val	C095	Ind	LOC_Os01g19220	GGGG	23.39
Val	C096	Ind	LOC_Os01g19220	GGAA	23.42
Val	C097	Ind	LOC_Os01g19220	GGAA	23.78
Val	C098	Ind	LOC_Os01g19220	GGGG	23.87
Val	C099	Ind	LOC_Os01g19220	GGGG	24.26
Val	C100	Ind	LOC_Os01g19220	GGAA	23.91
Val	C101	Jap	LOC_Os01g19220	AAGG	24.1
Val	C102	Ind	LOC_Os01g19220	GGAA	23.74
Val	C103	Jap	LOC_Os01g19220	AAGG	23.91
Val	C104	Ind	LOC_Os01g19220	GGGG	24.01
Val	C105	Ind	LOC_Os01g19220	GGGG	23.76
Val	C106	Jap	LOC_Os01g19220	AAGG	23.84
Val	C107	Ind	LOC_Os01g19220	GGGG	23.93
Val	C108	Ind	LOC_Os01g19220	GGGG	23.95
Val	C109	Ind	LOC_Os01g19220	GGGG	23.9
Val	C110	Ind	LOC_Os01g19220	GGGG	23.38
Val	C111	Jap	LOC_Os01g19220	AAGG	23.55
Val	C112	Ind	LOC_Os01g19220	GGAA	24.3
Val	C113	Ind	LOC_Os01g19220	GGAA	24.12
Val	C114	Ind	LOC_Os01g19220	GGAA	24.18
Val	C115	Ind	LOC_Os01g19220	GGAA	24.11
Val	C116	Jap	LOC_Os01g19220	AAGG	24.42
Val	C117	Ind	LOC_Os01g19220	GGGG	23.73
Val	C118	Ind	LOC_Os01g19220	GGGG	24.13
Val	C119	Jap	LOC_Os01g19220	AAGG	24.7
Val	C120	Jap	LOC_Os01g19220	AAGG	24.01
Val	C121	Ind	LOC_Os01g19220	GGGG	23.6
Val	C122	Ind	LOC_Os01g19220	GGAA	23.98
Val	C123	Jap	LOC_Os01g19220	GGAA	23.46
Val	C124	Ind	LOC_Os01g19220	GGGG	23.73
Val	C125	Ind	LOC_Os01g19220	GGAA	23.1
Val	C127	Ind	LOC_Os01g19220	GGAA	22.85
Val	C128	Ind	LOC_Os01g19220	GGAA	22.86
Val	C129	Ind	LOC_Os01g19220	GGAA	23
Val	C130	Jap	LOC_Os01g19220	AAGG	22.66
Val	C131	Ind	LOC_Os01g19220	GGAA	22.84
Val	C132	Ind	LOC_Os01g19220	AAGG	23.19
Val	C133	Jap	LOC_Os01g19220	AAGG	23.09
Val	C134	Jap	LOC_Os01g19220	AAGG	22.98
Val	C135	Ind	LOC_Os01g19220	GGGG	23.34
Val	C136	Ind	LOC_Os01g19220	GGGG	23.02
Val	C137	Jap	LOC_Os01g19220	AAGG	23.4
Val	C138	Jap	LOC_Os01g19220	AAGG	23.34
Val	C139	Ind	LOC_Os01g19220	GGAA	23.46
Val	C140	Ind	LOC_Os01g19220	GGGG	22.64
Val	C141	Ind	LOC_Os01g19220	GGGG	23.64
Val	C142	Ind	LOC_Os01g19220	GGGG	23.63
Val	C143	Ind	LOC_Os01g19220	GGGG	23.48
Val	C144	Jap	LOC_Os01g19220	AAGG	23.9
Val	C145	Ind	LOC_Os01g19220	GGAA	23.95
Val	C146	Jap	LOC_Os01g19220	AAGG	23.6
Val	C147	Ind	LOC_Os01g19220	GGAA	22.66
Val	C148	Ind	LOC_Os01g19220	GGAA	23.32
Val	C149	Jap	LOC_Os01g19220	AAGG	23.47
Val	C150	Jap	LOC_Os01g19220	AAGG	23.75
Val	C151	Ind	LOC_Os01g19220	GGAA	24.9
Val	C152	Jap	LOC_Os01g19220	AAGG	24.01
Val	C153	Jap	LOC_Os01g19220	AAGG	23.52
Val	C154	Jap	LOC_Os01g19220	AAGG	22.95
Val	C155	Ind	LOC_Os01g19220	GGGG	23.52
Val	C156	Ind	LOC_Os01g19220	GGAA	23.21
Val	C157	Ind	LOC_Os01g19220	GGAA	23.48
Val	C158	Ind	LOC_Os01g19220	GGAA	23.34
Val	C159	Ind	LOC_Os01g19220	GGGG	23.15
Val	C160	Ind	LOC_Os01g19220	AAGG	23.28
Val	C161	Ind	LOC_Os01g19220	GGGG	22.92
Val	C162	Ind	LOC_Os01g19220	GGGG	23.62
Val	C163	Ind	LOC_Os01g19220	GGGG	23.13
Val	C164	Ind	LOC_Os01g19220	GGGG	23.27
Val	C165	Ind	LOC_Os01g19220	GGAA	23.5
Val	C166	Ind	LOC_Os01g19220	GGAA	23.24
Val	C167	Ind	LOC_Os01g19220	GGGG	23.12
Val	C168	Ind	LOC_Os01g19220	GGGG	22.85
Val	C169	Ind	LOC_Os01g19220	GGGG	23.35
Val	C170	Ind	LOC_Os01g19220	GGAA	23.36
Val	C171	Jap	LOC_Os01g19220	AAGG	23.91
Val	C172	Jap	LOC_Os01g19220	AAGG	23.49
Val	C173	Ind	LOC_Os01g19220	GGGG	22.89
Val	C174	Ind	LOC_Os01g19220	GGAA	22.7
Val	C175	Ind	LOC_Os01g19220	GGAA	22.62
Val	C176	Ind	LOC_Os01g19220	GGGG	23.55
Val	C177	Jap	LOC_Os01g19220	AAGG	23.75
Val	C178	Ind	LOC_Os01g19220	GGGG	23.36
Val	C179	Jap	LOC_Os01g19220	AAGG	23.91
Val	C180	Ind	LOC_Os01g19220	GGAA	22.93
Val	C181	Jap	LOC_Os01g19220	AAGG	24.51
Val	C182	Ind	LOC_Os01g19220	GGAA	24.21
Val	C183	Ind	LOC_Os01g19220	GGAA	24.56
Val	C184	Ind	LOC_Os01g19220	GGGG	24.13
Val	C185	Jap	LOC_Os01g19220	AAGG	24.52
Val	C186	Jap	LOC_Os01g19220	AAGG	24.9
Val	C187	Jap	LOC_Os01g19220	AAGG	24.3
Val	C188	Jap	LOC_Os01g19220	AAGG	23.73
Val	C189	Jap	LOC_Os01g19220	AAGG	24.57
Val	C190	Ind	LOC_Os01g19220	GGAA	23.86
Val	C191	Ind	LOC_Os01g19220	GGGG	24.09
Val	C192	Ind	LOC_Os01g19220	GGGG	23.63
Val	C193	Ind	LOC_Os01g19220	GGAA	23.96
Val	C194	Ind	LOC_Os01g19220	GGGG	23.83
Val	C195	Jap	LOC_Os01g19220	AAGG	24.13
Val	C196	Jap	LOC_Os01g19220	AAGG	24.5
Val	C197	Ind	LOC_Os01g19220	GGGG	23.92
Val	C198	Ind	LOC_Os01g19220	GGGG	24.17
Val	C199	Ind	LOC_Os01g19220	GGAA	24.05
Val	C200	Ind	LOC_Os01g19220	GGGG	24.24
Val	C201	Ind	LOC_Os01g19220	GGGG	24.04
Val	C202	Ind	LOC_Os01g19220	GGGG	23.98
Val	C203	Ind	LOC_Os01g19220	GGGG	24.69
Val	W001	Ind	LOC_Os01g19220	GGGG	24.46
Val	W002	Jap	LOC_Os01g19220	AAGG	24.6
Val	W003	Jap	LOC_Os01g19220	AAGG	24.25
Val	W004	Jap	LOC_Os01g19220	AAGG	23.71
Val	W005	Jap	LOC_Os01g19220	AAGG	24.26
Val	W006	Jap	LOC_Os01g19220	AAGG	24.58
Val	W007	Jap	LOC_Os01g19220	AAGG	23.97
Val	W008	Jap	LOC_Os01g19220	AAGG	23.5
Val	W009	Ind	LOC_Os01g19220	GGGG	23.24
Val	W010	Jap	LOC_Os01g19220	AAGG	23.63
Val	W011	Jap	LOC_Os01g19220	AAGG	23.12
Val	W012	Jap	LOC_Os01g19220	AAGG	22.68
Val	W013	Jap	LOC_Os01g19220	AAGG	22.68
Val	W016	Jap	LOC_Os01g19220	AAGG	23.48
Val	W017	Jap	LOC_Os01g19220	AAGG	23.16
Val	W018	Jap	LOC_Os01g19220	AAGG	23.88
Val	W019	Jap	LOC_Os01g19220	AAGG	22.95
Val	W021	Jap	LOC_Os01g19220	AAGG	23.5
Val	W022	Jap	LOC_Os01g19220	AAGG	23.17
Val	W023	Ind	LOC_Os01g19220	GGAA	21.87
Val	W024	Jap	LOC_Os01g19220	AAGG	24.09
Val	W026	Ind	LOC_Os01g19220	GGGG	23.31
Val	W027	Jap	LOC_Os01g19220	AAGG	22.08
Val	W029	Ind	LOC_Os01g19220	GGGG	22.57
Val	W030	Ind	LOC_Os01g19220	GGGG	23.4
Val	W031	Ind	LOC_Os01g19220	GGGG	24.12
Val	W032	Ind	LOC_Os01g19220	GGGG	23.36
Val	W033	Ind	LOC_Os01g19220	GGAA	23.25
Val	W035	Ind	LOC_Os01g19220	GGGG	23.93
Val	W036	Ind	LOC_Os01g19220	GGAA	24.1
Val	W038	Jap	LOC_Os01g19220	AAGG	23.03
Val	W039	Ind	LOC_Os01g19220	GGGG	23.6
Val	W040	Ind	LOC_Os01g19220	GGGG	23.64
Val	W041	Jap	LOC_Os01g19220	AAGG	25.01
Val	W043	Ind	LOC_Os01g19220	GGGG	23.9
Val	W045	Jap	LOC_Os01g19220	AAGG	23.89
Val	W046	Ind	LOC_Os01g19220	GGGG	23.86
Val	W047	Jap	LOC_Os01g19220	AAGG	23.81
Val	W051	Ind	LOC_Os01g19220	GGGG	23.07
Val	W052	Jap	LOC_Os01g19220	AAGG	24.22
Val	W053	Jap	LOC_Os01g19220	AAGG	23.77
Val	W054	Ind	LOC_Os01g19220	GGAA	24.38
Val	W056	Jap	LOC_Os01g19220	AAGG	23.96
Val	W057	Jap	LOC_Os01g19220	AAGG	23.53
Val	W058	Ind	LOC_Os01g19220	GGGG	23.92
Val	W059	Jap	LOC_Os01g19220	AAGG	24.24
Val	W060	Jap	LOC_Os01g19220	AAGG	23.24
Val	W061	Jap	LOC_Os01g19220	AAGG	23.91
Val	W062	Jap	LOC_Os01g19220	AAGG	23.24
Val	W063	Jap	LOC_Os01g19220	AAGG	23.79
Val	W064	Jap	LOC_Os01g19220	AAGG	24.09
Val	W065	Jap	LOC_Os01g19220	AAGG	23.4
Val	W066	Ind	LOC_Os01g19220	GGAA	23.39
Val	W067	Jap	LOC_Os01g19220	AAGG	24.09
Val	W068	Jap	LOC_Os01g19220	AAGG	23.72
Val	W070	Ind	LOC_Os01g19220	GGGG	24.4
Val	W071	Ind	LOC_Os01g19220	GGGG	24.7
Val	W073	Ind	LOC_Os01g19220	GGGG	23.2
Val	W074	Ind	LOC_Os01g19220	GGGG	24.25
Val	W075	Ind	LOC_Os01g19220	GGGG	23.38
Val	W078	Ind	LOC_Os01g19220	GGGG	23.94
Val	W080	Ind	LOC_Os01g19220	GGAA	24.53
Val	W082	Jap	LOC_Os01g19220	AAGG	24.78
Val	W083	Ind	LOC_Os01g19220	GGAA	23.82
Val	W084	Ind	LOC_Os01g19220	GGGG	24.22
Val	W085	Ind	LOC_Os01g19220	GGGG	24.23
Val	W086	Ind	LOC_Os01g19220	GGGG	24.91
Val	W087	Ind	LOC_Os01g19220	GGAA	25.11
Val	W088	Jap	LOC_Os01g19220	AAGG	25.83
Val	W089	Ind	LOC_Os01g19220	GGAA	24.15
Val	W093	Ind	LOC_Os01g19220	GGAA	24.11
Val	W101	Ind	LOC_Os01g19220	GGGG	23.92
Val	W102	Jap	LOC_Os01g19220	AAGG	24.65
Val	W109	Jap	LOC_Os01g19220	AAGG	24.04
Val	W110	Jap	LOC_Os01g19220	AAGG	25.06
Val	W111	Ind	LOC_Os01g19220	GGGG	23.5
Val	W112	Ind	LOC_Os01g19220	GGAA	22.92
Val	W113	Jap	LOC_Os01g19220	AAGG	25.14
Val	W114	Ind	LOC_Os01g19220	GGGG	23.46
Val	W116	Jap	LOC_Os01g19220	AAGG	24.41
Val	W117	Jap	LOC_Os01g19220	AAGG	23.82
Val	W118	Jap	LOC_Os01g19220	AAGG	24.64
Val	W119	Jap	LOC_Os01g19220	AAGG	24.42
Val	W120	Jap	LOC_Os01g19220	AAGG	24.18
Val	W122	Jap	LOC_Os01g19220	AAGG	24.23
Val	W123	Jap	LOC_Os01g19220	AAGG	24.47
Val	W124	Ind	LOC_Os01g19220	GGAA	23.39
Val	W126	Ind	LOC_Os01g19220	GGAA	23.82
Val	W127	Jap	LOC_Os01g19220	AAGG	24.76
Val	W130	Jap	LOC_Os01g19220	AAGG	24.09
Val	W132	Ind	LOC_Os01g19220	GGGG	24.1
Val	W133	Ind	LOC_Os01g19220	GGAA	24.42
Val	W137	Ind	LOC_Os01g19220	GGGG	23.31
Val	W138	Ind	LOC_Os01g19220	GGAA	22.77
Val	W139	Jap	LOC_Os01g19220	AAGG	24.04
Val	W143	Jap	LOC_Os01g19220	AAGG	24.1
Val	W144	Ind	LOC_Os01g19220	GGGG	23.46
Val	W145	Ind	LOC_Os01g19220	GGGG	23.14
Val	W146	Ind	LOC_Os01g19220	GGAA	22.86
Val	W147	Ind	LOC_Os01g19220	GGGG	23.49
Val	W148	Ind	LOC_Os01g19220	GGGG	23.39
Val	W149	Ind	LOC_Os01g19220	GGAA	24.27
Val	W150	Ind	LOC_Os01g19220	GGAA	23.49
Val	W151	Ind	LOC_Os01g19220	GGGG	24.62
Val	W152	Ind	LOC_Os01g19220	GGAA	22.97
Val	W153	Ind	LOC_Os01g19220	GGAA	23.01
Val	W154	Ind	LOC_Os01g19220	GGGG	22.91
Val	W155	Ind	LOC_Os01g19220	GGAA	23.2
Val	W156	Ind	LOC_Os01g19220	GGGG	23.35
Val	W157	Ind	LOC_Os01g19220	AAGG	22.88
Val	W159	Ind	LOC_Os01g19220	GGGG	22.14
Val	W160	Jap	LOC_Os01g19220	AAGG	23.09
Val	W161	Ind	LOC_Os01g19220	GGGG	22.69
Val	W162	Jap	LOC_Os01g19220	AAGG	23.43
Val	W163	Ind	LOC_Os01g19220	GGGG	23.06
Val	W164	Ind	LOC_Os01g19220	GGGG	23.25
Val	W165	Ind	LOC_Os01g19220	GGGG	23.05
Val	W166	Ind	LOC_Os01g19220	GGGG	22
Val	W167	Ind	LOC_Os01g19220	GGGG	21.69
Val	W168	Ind	LOC_Os01g19220	GGGG	23.04
Val	W169	Ind	LOC_Os01g19220	GGGG	22.49
Val	W170	Ind	LOC_Os01g19220	GGGG	23.27
Val	W171	Ind	LOC_Os01g19220	GGGG	22.41
Val	W172	Ind	LOC_Os01g19220	GGGG	22.51
Val	W173	Jap	LOC_Os01g19220	AAGG	23.94
Val	W174	Ind	LOC_Os01g19220	GGGG	22.77
Val	W176	Ind	LOC_Os01g19220	GGGG	22.28
Val	W177	Ind	LOC_Os01g19220	GGGG	22.51
Val	W178	Ind	LOC_Os01g19220	GGGG	22.48
Val	W179	Ind	LOC_Os01g19220	GGGG	22.11
Val	W180	Ind	LOC_Os01g19220	GGAA	22.1
Val	W181	Ind	LOC_Os01g19220	GGAA	23.44
Val	W182	Ind	LOC_Os01g19220	GGAA	22.75
Val	W183	Ind	LOC_Os01g19220	GGAA	22.19
Val	W184	Ind	LOC_Os01g19220	GGGG	22.45
Val	W185	Ind	LOC_Os01g19220	GGGG	22.74
Val	W186	Ind	LOC_Os01g19220	GGGG	23.73
Val	W187	Ind	LOC_Os01g19220	GGGG	24.45
Val	W188	Ind	LOC_Os01g19220	AAGG	22.74
Val	W189	Ind	LOC_Os01g19220	GGGG	22.89
Val	W193	Jap	LOC_Os01g19220	AAGG	23.97
Val	W194	Ind	LOC_Os01g19220	GGAA	23.62
Val	W195	Ind	LOC_Os01g19220	GGGG	23.68
Val	W197	Ind	LOC_Os01g19220	GGGG	23.54
Val	W198	Ind	LOC_Os01g19220	GGGG	23.59
Val	W199	Ind	LOC_Os01g19220	GGGG	23.62
Val	W200	Ind	LOC_Os01g19220	GGAA	23.3
Val	W201	Ind	LOC_Os01g19220	GGAA	23.64
Val	W202	Ind	LOC_Os01g19220	GGAA	23.61
Val	W203	Ind	LOC_Os01g19220	GGAA	23.72
Val	W204	Ind	LOC_Os01g19220	GGGG	23.54
Val	W205	Ind	LOC_Os01g19220	GGGG	23.59
Val	W206	Ind	LOC_Os01g19220	GGGG	23.58
Val	W207	Jap	LOC_Os01g19220	AAGG	23.83
Val	W208	Jap	LOC_Os01g19220	GGGG	24.88
Val	W209	Jap	LOC_Os01g19220	GGGG	24.01
Val	W210	Ind	LOC_Os01g19220	GGAA	23.49
Val	W211	Ind	LOC_Os01g19220	GGGG	23.2
Val	W212	Ind	LOC_Os01g19220	GGGG	23.86
Val	W213	Ind	LOC_Os01g19220	GGGG	23.1
Val	W216	Ind	LOC_Os01g19220	GGGG	23.54
Val	W217	Ind	LOC_Os01g19220	GGGG	23.78
Val	W218	Ind	LOC_Os01g19220	GGGG	24.23
Val	W221	Ind	LOC_Os01g19220	GGGG	24.23
Val	W222	Ind	LOC_Os01g19220	GGGG	24.22
Val	W223	Ind	LOC_Os01g19220	GGGG	24.07
Val	W224	Ind	LOC_Os01g19220	GGGG	23.97
Val	W225	Jap	LOC_Os01g19220	AAGG	24.79
Val	W226	Jap	LOC_Os01g19220	AAGG	24.83
Val	W227	Ind	LOC_Os01g19220	GGAA	24
Val	W228	Ind	LOC_Os01g19220	GGGG	23.92
Val	W229	Ind	LOC_Os01g19220	GGGG	23.77
Val	W230	Ind	LOC_Os01g19220	GGGG	24.04
Val	W231	Ind	LOC_Os01g19220	GGGG	23.93
Val	W233	Ind	LOC_Os01g19220	GGGG	24.67
Val	W234	Ind	LOC_Os01g19220	GGGG	24.34
Val	W235	Ind	LOC_Os01g19220	GGGG	23.9
Val	W236	Ind	LOC_Os01g19220	GGAA	24.45
Val	W237	Ind	LOC_Os01g19220	GGAA	24.22
Val	W238	Ind	LOC_Os01g19220	GGAA	24.29
Val	W239	Ind	LOC_Os01g19220	GGAA	23.9
Val	W240	Ind	LOC_Os01g19220	GGAA	23.89
Val	W241	Ind	LOC_Os01g19220	GGAA	23.87
Val	W242	Ind	LOC_Os01g19220	GGGG	23.8
Val	W243	Ind	LOC_Os01g19220	GGAA	24.27
Val	W245	Ind	LOC_Os01g19220	GGAA	23.58
Val	W246	Ind	LOC_Os01g19220	GGAA	23.71
Val	W247	Ind	LOC_Os01g19220	GGAA	24.04
Val	W248	Ind	LOC_Os01g19220	GGGG	24.13
Val	W249	Jap	LOC_Os01g19220	AAGG	24.35
Val	W250	Jap	LOC_Os01g19220	AAGG	23.96
Val	W251	Jap	LOC_Os01g19220	AAGG	24.62
Val	W253	Jap	LOC_Os01g19220	AAGG	24.18
Val	W254	Jap	LOC_Os01g19220	AAGG	24.42
Val	W257	Jap	LOC_Os01g19220	AAGG	24.46
Val	W259	Ind	LOC_Os01g19220	GGAA	24.06
Val	W260	Jap	LOC_Os01g19220	AAGG	24.06
Val	W262	Ind	LOC_Os01g19220	GGGG	24.47
Val	W263	Ind	LOC_Os01g19220	GGGG	23.07
Val	W264	Ind	LOC_Os01g19220	GGAA	24.02
Val	W265	Ind	LOC_Os01g19220	GGGG	23.42
Val	W266	Ind	LOC_Os01g19220	GGGG	23.11
Val	W267	Ind	LOC_Os01g19220	GGGG	23.56
Val	W268	Ind	LOC_Os01g19220	GGGG	23.85
Val	W269	Ind	LOC_Os01g19220	GGAA	23.9
Val	W270	Ind	LOC_Os01g19220	GGGG	23.93
Val	W271	Ind	LOC_Os01g19220	GGAA	23.62
Val	W272	Ind	LOC_Os01g19220	GGAA	23.36
Val	W273	Jap	LOC_Os01g19220	AAGG	24.44
Val	W274	Ind	LOC_Os01g19220	GGAA	24.38
Val	W275	Jap	LOC_Os01g19220	AAGG	23.62
Val	W276	Ind	LOC_Os01g19220	GGGG	23.76
Val	W281	Jap	LOC_Os01g19220	AAGG	23.63
Val	W282	Ind	LOC_Os01g19220	GGGG	23.35
Val	W283	Jap	LOC_Os01g19220	AAGG	23.81
Val	W284	Jap	LOC_Os01g19220	AAGG	23.12
Val	W285	Jap	LOC_Os01g19220	AAGG	24.34
Val	W288	Jap	LOC_Os01g19220	AAGG	23.79
Val	W289	Ind	LOC_Os01g19220	GGGG	23.52
Val	W290	Jap	LOC_Os01g19220	AAGG	24.06
Val	W291	Ind	LOC_Os01g19220	GGGG	23.34
Val	W293	Ind	LOC_Os01g19220	GGGG	23.46
Val	W295	Ind	LOC_Os01g19220	GGAA	22.65
Val	W298	Ind	LOC_Os01g19220	GGGG	23.03
Val	W299	Ind	LOC_Os01g19220	GGAA	23.43
Val	W300	Jap	LOC_Os01g19220	AAGG	23.42
Val	W301	Ind	LOC_Os01g19220	GGAA	22.19
Val	W302	Jap	LOC_Os01g19220	AAGG	22.55
Val	W303	Jap	LOC_Os01g19220	AAGG	23.01
Val	W305	Jap	LOC_Os01g19220	AAGG	23.22
Val	W307	Ind	LOC_Os01g19220	GGGG	22.65
Val	W308	Ind	LOC_Os01g19220	GGGG	22.85
Val	W309	Ind	LOC_Os01g19220	GGAA	22.82
Val	W310	Ind	LOC_Os01g19220	GGGG	23.02
Val	W311	Ind	LOC_Os01g19220	GGAA	22.53
Val	W312	Ind	LOC_Os01g19220	GGAA	21.92
Val	W313	Ind	LOC_Os01g19220	GGGG	22.23
Val	W314	Ind	LOC_Os01g19220	GGAA	22.94
Val	W315	Ind	LOC_Os01g19220	GGAA	22.05
Val	W316	Ind	LOC_Os01g19220	GGGG	23.58
Val	W317	Ind	LOC_Os01g19220	GGAA	22.17
Val	W318	Ind	LOC_Os01g19220	GGAA	22.59
Val	W319	Jap	LOC_Os01g19220	AAGG	23.43
Val	W320	Ind	LOC_Os01g19220	GGGG	22.52
Val	W321	Ind	LOC_Os01g19220	GGGG	22.99
Val	W322	Ind	LOC_Os01g19220	GGAA	22.72
Val	W323	Jap	LOC_Os01g19220	AAGG	23.62
Val	W324	Jap	LOC_Os01g19220	AAGG	23.65
Val	W325	Jap	LOC_Os01g19220	AAGG	22.66
Val	W326	Jap	LOC_Os01g19220	AAGG	23.52
Val	W327	Jap	LOC_Os01g19220	AAGG	23.23
Val	W329	Jap	LOC_Os01g19220	AAGG	23.64
Leu	C001	Ind	LOC_Os01g12940	TTGG	24.6
Leu	C003	Jap	LOC_Os01g12940	TTTT	24.09
Leu	C004	Jap	LOC_Os01g12940	TTTT	23.34
Leu	C005	Jap	LOC_Os01g12940	TTGG	24.64
Leu	C006	Ind	LOC_Os01g12940	TTGG	23
Leu	C007	Ind	LOC_Os01g12940	TTGG	23.28
Leu	C008	Ind	LOC_Os01g12940	TTGG	23.95
Leu	C009	Ind	LOC_Os01g12940	TTGG	24.13
Leu	C010	Jap	LOC_Os01g12940	TTTT	24.09
Leu	C011	Ind	LOC_Os01g12940	TTGG	23.32
Leu	C012	Jap	LOC_Os01g12940	TTTT	24.12
Leu	C014	Jap	LOC_Os01g12940	TTTT	24.09
Leu	C016	Jap	LOC_Os01g12940	TTTT	23.53
Leu	C017	Jap	LOC_Os01g12940	TTTT	23.43
Leu	C018	Jap	LOC_Os01g12940	TTTT	23.24
Leu	C019	Ind	LOC_Os01g12940	TTGG	23.85
Leu	C020	Ind	LOC_Os01g12940	TTGG	23.4
Leu	C021	Ind	LOC_Os01g12940	TTGG	22.71
Leu	C022	Ind	LOC_Os01g12940	TTGG	22.64
Leu	C023	Jap	LOC_Os01g12940	TTTT	23.9
Leu	C024	Ind	LOC_Os01g12940	TTGG	23.43
Leu	C025	Ind	LOC_Os01g12940	TTGG	23.56
Leu	C026	Jap	LOC_Os01g12940	TTTT	23.8
Leu	C027	Ind	LOC_Os01g12940	TTGG	24.25
Leu	C028	Jap	LOC_Os01g12940	TTTT	23.24
Leu	C029	Jap	LOC_Os01g12940	TTTT	23.66
Leu	C030	Ind	LOC_Os01g12940	TTGG	23.06
Leu	C031	Ind	LOC_Os01g12940	TTGG	23.6
Leu	C032	Jap	LOC_Os01g12940	TTTT	23.19
Leu	C033	Ind	LOC_Os01g12940	TTGG	24.65
Leu	C034	Jap	LOC_Os01g12940	TTTT	24.15
Leu	C035	Jap	LOC_Os01g12940	TTTT	23.49
Leu	C036	Ind	LOC_Os01g12940	TTGG	24.55
Leu	C037	Ind	LOC_Os01g12940	TTGG	24.6
Leu	C038	Ind	LOC_Os01g12940	TTGG	24.46
Leu	C039	Ind	LOC_Os01g12940	TTGG	24.86
Leu	C040	Ind	LOC_Os01g12940	TTGG	24.68
Leu	C041	Ind	LOC_Os01g12940	TTGG	24.11
Leu	C042	Ind	LOC_Os01g12940	TTGG	24.62
Leu	C043	Ind	LOC_Os01g12940	TTGG	24.09
Leu	C044	Ind	LOC_Os01g12940	TTGG	24
Leu	C045	Ind	LOC_Os01g12940	TTGG	23.97
Leu	C046	Ind	LOC_Os01g12940	TTGG	24.53
Leu	C047	Ind	LOC_Os01g12940	TTGG	23.98
Leu	C048	Jap	LOC_Os01g12940	TTTT	24.88
Leu	C049	Ind	LOC_Os01g12940	TTGG	24.04
Leu	C050	Ind	LOC_Os01g12940	TTGG	24.06
Leu	C052	Jap	LOC_Os01g12940	TTTT	25.2
Leu	C053	Ind	LOC_Os01g12940	TTGG	24.19
Leu	C054	Jap	LOC_Os01g12940	TTTT	25.22
Leu	C055	Ind	LOC_Os01g12940	TTGG	25.26
Leu	C056	Jap	LOC_Os01g12940	TTTT	23.9
Leu	C057	Jap	LOC_Os01g12940	TTTT	24.22
Leu	C058	Ind	LOC_Os01g12940	TTGG	24.03
Leu	C059	Ind	LOC_Os01g12940	TTGG	24.85
Leu	C060	Ind	LOC_Os01g12940	TTGG	24.68
Leu	C061	Ind	LOC_Os01g12940	TTGG	24.61
Leu	C062	Ind	LOC_Os01g12940	TTGG	24.39
Leu	C063	Jap	LOC_Os01g12940	TTTT	24.92
Leu	C064	Jap	LOC_Os01g12940	TTTT	24.63
Leu	C065	Ind	LOC_Os01g12940	TTGG	24.44
Leu	C066	Ind	LOC_Os01g12940	TTGG	24.74
Leu	C067	Jap	LOC_Os01g12940	TTTT	24.22
Leu	C068	Ind	LOC_Os01g12940	TTGG	24.87
Leu	C069	Ind	LOC_Os01g12940	TTGG	24.95
Leu	C070	Jap	LOC_Os01g12940	TTTT	24.43
Leu	C071	Jap	LOC_Os01g12940	TTTT	23.75
Leu	C072	Ind	LOC_Os01g12940	TTGG	23.52
Leu	C073	Ind	LOC_Os01g12940	TTGG	22.01
Leu	C074	Jap	LOC_Os01g12940	TTTT	23.96
Leu	C075	Jap	LOC_Os01g12940	TTTT	23.53
Leu	C076	Ind	LOC_Os01g12940	TTGG	22.94
Leu	C077	Ind	LOC_Os01g12940	TTGG	23.4
Leu	C078	Ind	LOC_Os01g12940	TTGG	23.27
Leu	C079	Jap	LOC_Os01g12940	TTTT	23.53
Leu	C080	Ind	LOC_Os01g12940	TTGG	23.1
Leu	C081	Ind	LOC_Os01g12940	TTGG	22.87
Leu	C082	Jap	LOC_Os01g12940	TTTT	23.11
Leu	C083	Jap	LOC_Os01g12940	TTTT	23.15
Leu	C085	Jap	LOC_Os01g12940	TTTT	24.64
Leu	C087	Jap	LOC_Os01g12940	TTTT	24.57
Leu	C088	Ind	LOC_Os01g12940	TTGG	23.38
Leu	C089	Jap	LOC_Os01g12940	TTTT	23.52
Leu	C090	Ind	LOC_Os01g12940	TTGG	23.56
Leu	C091	Ind	LOC_Os01g12940	TTGG	23.69
Leu	C092	Ind	LOC_Os01g12940	TTGG	23.61
Leu	C093	Jap	LOC_Os01g12940	TTTT	25.24
Leu	C094	Ind	LOC_Os01g12940	TTGG	22.89
Leu	C095	Ind	LOC_Os01g12940	TTGG	22.65
Leu	C096	Ind	LOC_Os01g12940	TTGG	23.39
Leu	C097	Ind	LOC_Os01g12940	TTGG	22.75
Leu	C098	Ind	LOC_Os01g12940	TTGG	23.08
Leu	C099	Ind	LOC_Os01g12940	TTGG	23.59
Leu	C100	Ind	LOC_Os01g12940	TTGG	23.02
Leu	C101	Jap	LOC_Os01g12940	TTTT	23.99
Leu	C102	Ind	LOC_Os01g12940	TTGG	23.52
Leu	C103	Jap	LOC_Os01g12940	TTTT	24.05
Leu	C104	Ind	LOC_Os01g12940	TTGG	23.43
Leu	C105	Ind	LOC_Os01g12940	TTGG	22.97
Leu	C106	Jap	LOC_Os01g12940	TTTT	23.44
Leu	C107	Ind	LOC_Os01g12940	TTGG	22.79
Leu	C108	Ind	LOC_Os01g12940	TTGG	22.5
Leu	C109	Ind	LOC_Os01g12940	TTGG	23.25
Leu	C110	Ind	LOC_Os01g12940	TTGG	23.46
Leu	C111	Jap	LOC_Os01g12940	TTTT	22.68
Leu	C112	Ind	LOC_Os01g12940	TTGG	23.9
Leu	C113	Ind	LOC_Os01g12940	TTGG	23.27
Leu	C114	Ind	LOC_Os01g12940	TTGG	23.68
Leu	C115	Ind	LOC_Os01g12940	TTGG	23.35
Leu	C116	Jap	LOC_Os01g12940	TTTT	24.15
Leu	C117	Ind	LOC_Os01g12940	TTGG	23.05
Leu	C118	Ind	LOC_Os01g12940	TTGG	23.42
Leu	C119	Jap	LOC_Os01g12940	TTGG	24.16
Leu	C120	Jap	LOC_Os01g12940	TTTT	23.48
Leu	C121	Ind	LOC_Os01g12940	TTGG	23.49
Leu	C122	Ind	LOC_Os01g12940	TTGG	23.65
Leu	C123	Jap	LOC_Os01g12940	TTGG	23.68
Leu	C124	Ind	LOC_Os01g12940	TTGG	23.4
Leu	C125	Ind	LOC_Os01g12940	TTGG	22.84
Leu	C127	Ind	LOC_Os01g12940	TTGG	22.39
Leu	C128	Ind	LOC_Os01g12940	TTGG	22.14
Leu	C129	Ind	LOC_Os01g12940	TTGG	22.55
Leu	C130	Jap	LOC_Os01g12940	TTTT	22.45
Leu	C131	Ind	LOC_Os01g12940	TTGG	22.53
Leu	C132	Ind	LOC_Os01g12940	TTGG	22.79
Leu	C133	Jap	LOC_Os01g12940	TTTT	23.25
Leu	C134	Jap	LOC_Os01g12940	TTTT	23.06
Leu	C135	Ind	LOC_Os01g12940	TTGG	23.05
Leu	C136	Ind	LOC_Os01g12940	TTGG	22.47
Leu	C137	Jap	LOC_Os01g12940	TTTT	23.04
Leu	C138	Jap	LOC_Os01g12940	TTTT	23.07
Leu	C139	Ind	LOC_Os01g12940	TTGG	23.03
Leu	C140	Ind	LOC_Os01g12940	TTGG	22.57
Leu	C141	Ind	LOC_Os01g12940	TTGG	23.47
Leu	C142	Ind	LOC_Os01g12940	TTGG	23.19
Leu	C143	Ind	LOC_Os01g12940	TTGG	23.74
Leu	C144	Jap	LOC_Os01g12940	TTTT	24.04
Leu	C145	Ind	LOC_Os01g12940	TTGG	23.92
Leu	C146	Jap	LOC_Os01g12940	TTTT	23.98
Leu	C147	Ind	LOC_Os01g12940	TTGG	22.97
Leu	C148	Ind	LOC_Os01g12940	TTGG	23.4
Leu	C149	Jap	LOC_Os01g12940	TTTT	23
Leu	C150	Jap	LOC_Os01g12940	TTTT	23.59
Leu	C151	Ind	LOC_Os01g12940	TTGG	23.77
Leu	C152	Jap	LOC_Os01g12940	TTGG	24.04
Leu	C153	Jap	LOC_Os01g12940	TTGG	23.68
Leu	C154	Jap	LOC_Os01g12940	TTTT	22.58
Leu	C155	Ind	LOC_Os01g12940	TTGG	23.59
Leu	C156	Ind	LOC_Os01g12940	TTGG	23.05
Leu	C157	Ind	LOC_Os01g12940	TTGG	23.46
Leu	C158	Ind	LOC_Os01g12940	TTGG	23.1
Leu	C159	Ind	LOC_Os01g12940	TTGG	23.08
Leu	C160	Ind	LOC_Os01g12940	TTTT	23.4
Leu	C161	Ind	LOC_Os01g12940	TTGG	22.73
Leu	C162	Ind	LOC_Os01g12940	TTGG	23.55
Leu	C163	Ind	LOC_Os01g12940	TTGG	23.09
Leu	C164	Ind	LOC_Os01g12940	TTGG	22.62
Leu	C165	Ind	LOC_Os01g12940	TTGG	23.13
Leu	C166	Ind	LOC_Os01g12940	TTGG	22.88
Leu	C167	Ind	LOC_Os01g12940	TTGG	22.75
Leu	C168	Ind	LOC_Os01g12940	TTGG	22.27
Leu	C169	Ind	LOC_Os01g12940	TTGG	22.77
Leu	C170	Ind	LOC_Os01g12940	TTGG	23.38
Leu	C171	Jap	LOC_Os01g12940	TTTT	23.99
Leu	C172	Jap	LOC_Os01g12940	TTTT	23.76
Leu	C173	Ind	LOC_Os01g12940	TTGG	22.25
Leu	C174	Ind	LOC_Os01g12940	TTGG	22.2
Leu	C175	Ind	LOC_Os01g12940	TTGG	22.07
Leu	C176	Ind	LOC_Os01g12940	TTGG	23.72
Leu	C177	Jap	LOC_Os01g12940	TTTT	24.07
Leu	C178	Ind	LOC_Os01g12940	TTGG	23.55
Leu	C179	Jap	LOC_Os01g12940	TTTT	23.88
Leu	C180	Ind	LOC_Os01g12940	TTGG	23.18
Leu	C181	Jap	LOC_Os01g12940	TTTT	24.24
Leu	C182	Ind	LOC_Os01g12940	TTGG	24.03
Leu	C183	Ind	LOC_Os01g12940	TTGG	24.49
Leu	C184	Ind	LOC_Os01g12940	TTGG	23.91
Leu	C185	Jap	LOC_Os01g12940	TTTT	24.52
Leu	C186	Jap	LOC_Os01g12940	TTTT	24.79
Leu	C187	Jap	LOC_Os01g12940	TTTT	24.36
Leu	C188	Jap	LOC_Os01g12940	TTTT	23.83
Leu	C189	Jap	LOC_Os01g12940	TTTT	24.45
Leu	C190	Ind	LOC_Os01g12940	TTGG	23.83
Leu	C191	Ind	LOC_Os01g12940	TTGG	24.34
Leu	C192	Ind	LOC_Os01g12940	TTGG	24.11
Leu	C193	Ind	LOC_Os01g12940	TTGG	23.88
Leu	C194	Ind	LOC_Os01g12940	TTGG	24.24
Leu	C195	Jap	LOC_Os01g12940	TTTT	23.98
Leu	C196	Jap	LOC_Os01g12940	TTTT	24.4
Leu	C197	Ind	LOC_Os01g12940	TTGG	24.25
Leu	C198	Ind	LOC_Os01g12940	TTGG	24.51
Leu	C199	Ind	LOC_Os01g12940	TTGG	24.16
Leu	C200	Ind	LOC_Os01g12940	TTGG	24.42
Leu	C201	Ind	LOC_Os01g12940	TTGG	24.11
Leu	C202	Ind	LOC_Os01g12940	TTGG	24.38
Leu	C203	Ind	LOC_Os01g12940	TTGG	24.12
Leu	W001	Ind	LOC_Os01g12940	TTGG	24.85
Leu	W002	Jap	LOC_Os01g12940	TTTT	24.64
Leu	W003	Jap	LOC_Os01g12940	TTTT	24.53
Leu	W004	Jap	LOC_Os01g12940	TTGG	24.13
Leu	W005	Jap	LOC_Os01g12940	TTTT	24.42
Leu	W006	Jap	LOC_Os01g12940	TTTT	25
Leu	W007	Jap	LOC_Os01g12940	TTGG	24.4
Leu	W008	Jap	LOC_Os01g12940	TTTT	23.12
Leu	W009	Ind	LOC_Os01g12940	TTGG	22.6
Leu	W010	Jap	LOC_Os01g12940	TTTT	23.98
Leu	W011	Jap	LOC_Os01g12940	TTTT	22.49
Leu	W012	Jap	LOC_Os01g12940	TTTT	22.49
Leu	W013	Jap	LOC_Os01g12940	TTTT	22.17
Leu	W016	Jap	LOC_Os01g12940	TTTT	23.21
Leu	W017	Jap	LOC_Os01g12940	TTTT	22.8
Leu	W018	Jap	LOC_Os01g12940	TTTT	24.36
Leu	W019	Jap	LOC_Os01g12940	TTTT	22.54
Leu	W021	Jap	LOC_Os01g12940	TTTT	23.05
Leu	W022	Jap	LOC_Os01g12940	TTGG	22.74
Leu	W023	Ind	LOC_Os01g12940	TTGG	21.64
Leu	W024	Jap	LOC_Os01g12940	TTTT	24.19
Leu	W026	Ind	LOC_Os01g12940	TTGG	22.98
Leu	W027	Jap	LOC_Os01g12940	TTTT	21.8
Leu	W029	Ind	LOC_Os01g12940	TTGG	22.29
Leu	W030	Ind	LOC_Os01g12940	TTGG	23.3
Leu	W031	Ind	LOC_Os01g12940	TTGG	22.83
Leu	W032	Ind	LOC_Os01g12940	TTGG	23.05
Leu	W033	Ind	LOC_Os01g12940	TTGG	22.43
Leu	W035	Ind	LOC_Os01g12940	TTGG	23.83
Leu	W036	Ind	LOC_Os01g12940	TTGG	22.73
Leu	W038	Jap	LOC_Os01g12940	TTTT	22.98
Leu	W039	Ind	LOC_Os01g12940	TTGG	23.19
Leu	W040	Ind	LOC_Os01g12940	TTGG	23.34
Leu	W041	Jap	LOC_Os01g12940	TTGG	24.25
Leu	W043	Ind	LOC_Os01g12940	TTGG	23.2
Leu	W045	Jap	LOC_Os01g12940	TTTT	22.79
Leu	W046	Ind	LOC_Os01g12940	TTGG	23.85
Leu	W047	Jap	LOC_Os01g12940	TTTT	22.8
Leu	W051	Ind	LOC_Os01g12940	TTGG	22.02
Leu	W052	Jap	LOC_Os01g12940	TTTT	23.77
Leu	W053	Jap	LOC_Os01g12940	TTTT	23.07
Leu	W054	Ind	LOC_Os01g12940	TTGG	22.91
Leu	W056	Jap	LOC_Os01g12940	TTTT	23.39
Leu	W057	Jap	LOC_Os01g12940	TTTT	22.55
Leu	W058	Ind	LOC_Os01g12940	TTGG	22.91
Leu	W059	Jap	LOC_Os01g12940	TTTT	23.87
Leu	W060	Jap	LOC_Os01g12940	TTTT	22.79
Leu	W061	Jap	LOC_Os01g12940	TTTT	22.75
Leu	W062	Jap	LOC_Os01g12940	TTTT	23.05
Leu	W063	Jap	LOC_Os01g12940	TTTT	22.73
Leu	W064	Jap	LOC_Os01g12940	TTTT	22.68
Leu	W065	Jap	LOC_Os01g12940	TTTT	22.6
Leu	W066	Ind	LOC_Os01g12940	TTGG	22.55
Leu	W067	Jap	LOC_Os01g12940	TTGG	22.84
Leu	W068	Jap	LOC_Os01g12940	TTTT	22.92
Leu	W070	Ind	LOC_Os01g12940	TTGG	23.13
Leu	W071	Ind	LOC_Os01g12940	TTGG	23.31
Leu	W073	Ind	LOC_Os01g12940	TTGG	22.18
Leu	W074	Ind	LOC_Os01g12940	TTGG	23.03
Leu	W075	Ind	LOC_Os01g12940	TTGG	23.35
Leu	W078	Ind	LOC_Os01g12940	TTGG	23.62
Leu	W080	Ind	LOC_Os01g12940	TTGG	23.43
Leu	W082	Jap	LOC_Os01g12940	TTTT	24.53
Leu	W083	Ind	LOC_Os01g12940	TTGG	23.65
Leu	W084	Ind	LOC_Os01g12940	TTGG	24.06
Leu	W085	Ind	LOC_Os01g12940	TTGG	23.82
Leu	W086	Ind	LOC_Os01g12940	TTGG	24.79
Leu	W087	Ind	LOC_Os01g12940	TTGG	24.67
Leu	W088	Jap	LOC_Os01g12940	TTTT	25.43
Leu	W089	Ind	LOC_Os01g12940	TTGG	23.39
Leu	W093	Ind	LOC_Os01g12940	TTGG	23.54
Leu	W101	Ind	LOC_Os01g12940	TTGG	23.19
Leu	W102	Jap	LOC_Os01g12940	TTTT	24.25
Leu	W109	Jap	LOC_Os01g12940	TTTT	23.69
Leu	W110	Jap	LOC_Os01g12940	TTTT	24.4
Leu	W111	Ind	LOC_Os01g12940	TTGG	22.52
Leu	W112	Ind	LOC_Os01g12940	TTGG	21.71
Leu	W113	Jap	LOC_Os01g12940	TTTT	24.68
Leu	W114	Ind	LOC_Os01g12940	TTGG	23.2
Leu	W116	Jap	LOC_Os01g12940	TTGG	23.54
Leu	W117	Jap	LOC_Os01g12940	TTTT	23.83
Leu	W118	Jap	LOC_Os01g12940	TTGG	24.69
Leu	W119	Jap	LOC_Os01g12940	TTGG	24.98
Leu	W120	Jap	LOC_Os01g12940	TTTT	24.52
Leu	W122	Jap	LOC_Os01g12940	TTTT	23.8
Leu	W123	Jap	LOC_Os01g12940	TTTT	24.16
Leu	W124	Ind	LOC_Os01g12940	TTGG	22.91
Leu	W126	Ind	LOC_Os01g12940	TTGG	23.94
Leu	W127	Jap	LOC_Os01g12940	TTTT	24.14
Leu	W130	Jap	LOC_Os01g12940	TTTT	23.58
Leu	W132	Ind	LOC_Os01g12940	TTGG	24.03
Leu	W133	Ind	LOC_Os01g12940	TTGG	24.86
Leu	W137	Ind	LOC_Os01g12940	TTGG	23.31
Leu	W138	Ind	LOC_Os01g12940	TTGG	22.03
Leu	W139	Jap	LOC_Os01g12940	TTTT	23.59
Leu	W143	Jap	LOC_Os01g12940	TTTT	23.55
Leu	W144	Ind	LOC_Os01g12940	TTGG	22.47
Leu	W145	Ind	LOC_Os01g12940	TTGG	21.99
Leu	W146	Ind	LOC_Os01g12940	TTGG	22.32
Leu	W147	Ind	LOC_Os01g12940	TTGG	22.38
Leu	W148	Ind	LOC_Os01g12940	TTGG	22.08
Leu	W149	Ind	LOC_Os01g12940	TTGG	23.72
Leu	W150	Ind	LOC_Os01g12940	TTGG	22.42
Leu	W151	Ind	LOC_Os01g12940	TTGG	24.03
Leu	W152	Ind	LOC_Os01g12940	TTGG	23.08
Leu	W153	Ind	LOC_Os01g12940	TTGG	22.96
Leu	W154	Ind	LOC_Os01g12940	TTGG	22.81
Leu	W155	Ind	LOC_Os01g12940	TTGG	22.92
Leu	W156	Ind	LOC_Os01g12940	TTGG	22.91
Leu	W157	Ind	LOC_Os01g12940	TTGG	22.78
Leu	W159	Ind	LOC_Os01g12940	TTGG	21.86
Leu	W160	Jap	LOC_Os01g12940	TTTT	23.27
Leu	W161	Ind	LOC_Os01g12940	TTGG	22.54
Leu	W162	Jap	LOC_Os01g12940	TTTT	23.65
Leu	W163	Ind	LOC_Os01g12940	TTGG	22.9
Leu	W164	Ind	LOC_Os01g12940	TTGG	22.75
Leu	W165	Ind	LOC_Os01g12940	TTGG	22.88
Leu	W166	Ind	LOC_Os01g12940	TTGG	21.41
Leu	W167	Ind	LOC_Os01g12940	TTGG	20.96
Leu	W168	Ind	LOC_Os01g12940	TTGG	22.94
Leu	W169	Ind	LOC_Os01g12940	TTGG	22.02
Leu	W170	Ind	LOC_Os01g12940	TTGG	23.44
Leu	W171	Ind	LOC_Os01g12940	TTGG	22.44
Leu	W172	Ind	LOC_Os01g12940	TTGG	21.93
Leu	W173	Jap	LOC_Os01g12940	TTTT	24.1
Leu	W174	Ind	LOC_Os01g12940	TTGG	22.72
Leu	W176	Ind	LOC_Os01g12940	TTGG	22.04
Leu	W177	Ind	LOC_Os01g12940	TTGG	22.27
Leu	W178	Ind	LOC_Os01g12940	TTGG	22.08
Leu	W179	Ind	LOC_Os01g12940	TTGG	21.16
Leu	W180	Ind	LOC_Os01g12940	TTGG	21.46
Leu	W181	Ind	LOC_Os01g12940	TTGG	23.2
Leu	W182	Ind	LOC_Os01g12940	TTGG	21.89
Leu	W183	Ind	LOC_Os01g12940	TTGG	22.06
Leu	W184	Ind	LOC_Os01g12940	TTGG	22.03
Leu	W185	Ind	LOC_Os01g12940	TTGG	22.87
Leu	W186	Ind	LOC_Os01g12940	TTGG	23.35
Leu	W187	Ind	LOC_Os01g12940	TTGG	24.34
Leu	W188	Ind	LOC_Os01g12940	TTGG	21.55
Leu	W189	Ind	LOC_Os01g12940	TTGG	22.23
Leu	W193	Jap	LOC_Os01g12940	TTTT	23.77
Leu	W194	Ind	LOC_Os01g12940	TTGG	23.22
Leu	W195	Ind	LOC_Os01g12940	TTGG	23.76
Leu	W197	Ind	LOC_Os01g12940	TTGG	22.95
Leu	W198	Ind	LOC_Os01g12940	TTGG	23.21
Leu	W199	Ind	LOC_Os01g12940	TTGG	22.85
Leu	W200	Ind	LOC_Os01g12940	TTGG	22.53
Leu	W201	Ind	LOC_Os01g12940	TTGG	23.54
Leu	W202	Ind	LOC_Os01g12940	TTGG	23.77
Leu	W203	Ind	LOC_Os01g12940	TTGG	23.36
Leu	W204	Ind	LOC_Os01g12940	TTGG	22.4
Leu	W205	Ind	LOC_Os01g12940	TTGG	23.31
Leu	W206	Ind	LOC_Os01g12940	TTGG	22.59
Leu	W207	Jap	LOC_Os01g12940	TTTT	23.54
Leu	W208	Jap	LOC_Os01g12940	TTGG	25.24
Leu	W209	Jap	LOC_Os01g12940	TTTT	23.34
Leu	W210	Ind	LOC_Os01g12940	TTGG	22.58
Leu	W211	Ind	LOC_Os01g12940	TTGG	22.36
Leu	W212	Ind	LOC_Os01g12940	TTGG	23.13
Leu	W213	Ind	LOC_Os01g12940	TTGG	22.58
Leu	W216	Ind	LOC_Os01g12940	TTGG	23.08
Leu	W217	Ind	LOC_Os01g12940	TTGG	23.13
Leu	W218	Ind	LOC_Os01g12940	TTGG	24.21
Leu	W221	Ind	LOC_Os01g12940	TTGG	24.03
Leu	W222	Ind	LOC_Os01g12940	TTGG	24.55
Leu	W223	Ind	LOC_Os01g12940	TTGG	23.87
Leu	W224	Ind	LOC_Os01g12940	TTGG	23.28
Leu	W225	Jap	LOC_Os01g12940	TTGG	24.84
Leu	W226	Jap	LOC_Os01g12940	TTTT	25.51
Leu	W227	Ind	LOC_Os01g12940	TTGG	23.93
Leu	W228	Ind	LOC_Os01g12940	TTGG	23.46
Leu	W229	Ind	LOC_Os01g12940	TTGG	23.28
Leu	W230	Ind	LOC_Os01g12940	TTGG	24.41
Leu	W231	Ind	LOC_Os01g12940	TTGG	23.61
Leu	W233	Ind	LOC_Os01g12940	TTGG	24.91
Leu	W234	Ind	LOC_Os01g12940	TTGG	23.71
Leu	W235	Ind	LOC_Os01g12940	TTGG	23.3
Leu	W236	Ind	LOC_Os01g12940	TTGG	24.43
Leu	W237	Ind	LOC_Os01g12940	TTGG	24.13
Leu	W238	Ind	LOC_Os01g12940	TTGG	24.27
Leu	W239	Ind	LOC_Os01g12940	TTGG	23.36
Leu	W240	Ind	LOC_Os01g12940	TTGG	23.08
Leu	W241	Ind	LOC_Os01g12940	TTGG	23.19
Leu	W242	Ind	LOC_Os01g12940	TTGG	23.2
Leu	W243	Ind	LOC_Os01g12940	TTGG	24.05
Leu	W245	Ind	LOC_Os01g12940	TTGG	22.86
Leu	W246	Ind	LOC_Os01g12940	TTGG	22.77
Leu	W247	Ind	LOC_Os01g12940	TTGG	22.8
Leu	W248	Ind	LOC_Os01g12940	TTGG	23.5
Leu	W249	Jap	LOC_Os01g12940	TTTT	24.04
Leu	W250	Jap	LOC_Os01g12940	TTTT	23.87
Leu	W251	Jap	LOC_Os01g12940	TTTT	25.08
Leu	W253	Jap	LOC_Os01g12940	TTTT	24.12
Leu	W254	Jap	LOC_Os01g12940	TTTT	25.04
Leu	W257	Jap	LOC_Os01g12940	TTTT	24.34
Leu	W259	Ind	LOC_Os01g12940	TTGG	23.24
Leu	W260	Jap	LOC_Os01g12940	TTGG	24.58
Leu	W262	Ind	LOC_Os01g12940	TTGG	23.27
Leu	W263	Ind	LOC_Os01g12940	TTGG	22.98
Leu	W264	Ind	LOC_Os01g12940	TTGG	23.65
Leu	W265	Ind	LOC_Os01g12940	TTGG	22.75
Leu	W266	Ind	LOC_Os01g12940	TTGG	22.81
Leu	W267	Ind	LOC_Os01g12940	TTGG	22.91
Leu	W268	Ind	LOC_Os01g12940	TTGG	23.44
Leu	W269	Ind	LOC_Os01g12940	TTGG	22.36
Leu	W270	Ind	LOC_Os01g12940	TTGG	23.31
Leu	W271	Ind	LOC_Os01g12940	TTGG	23.09
Leu	W272	Ind	LOC_Os01g12940	TTGG	23.01
Leu	W273	Jap	LOC_Os01g12940	TTGG	23.98
Leu	W274	Ind	LOC_Os01g12940	TTGG	23.94
Leu	W275	Jap	LOC_Os01g12940	AAGG	23.91
Leu	W276	Ind	LOC_Os01g12940	TTGG	23.92
Leu	W281	Jap	LOC_Os01g12940	TTTT	23.55
Leu	W282	Ind	LOC_Os01g12940	TTGG	23.17
Leu	W283	Jap	LOC_Os01g12940	TTTT	23.38
Leu	W284	Jap	LOC_Os01g12940	TTTT	23.35
Leu	W285	Jap	LOC_Os01g12940	TTTT	24.16
Leu	W288	Jap	LOC_Os01g12940	TTGG	23.55
Leu	W289	Ind	LOC_Os01g12940	TTGG	23.77
Leu	W290	Jap	LOC_Os01g12940	TTTT	24.07
Leu	W291	Ind	LOC_Os01g12940	TTGG	23.39
Leu	W293	Ind	LOC_Os01g12940	TTGG	23.1
Leu	W295	Ind	LOC_Os01g12940	TTGG	21.76
Leu	W298	Ind	LOC_Os01g12940	TTGG	22.57
Leu	W299	Ind	LOC_Os01g12940	TTGG	23.18
Leu	W300	Jap	LOC_Os01g12940	TTTT	23.11
Leu	W301	Ind	LOC_Os01g12940	TTGG	21.52
Leu	W302	Jap	LOC_Os01g12940	TTTT	21.9
Leu	W303	Jap	LOC_Os01g12940	TTTT	22.87
Leu	W305	Jap	LOC_Os01g12940	TTTT	23.44
Leu	W307	Ind	LOC_Os01g12940	TTGG	22.31
Leu	W308	Ind	LOC_Os01g12940	TTGG	22.42
Leu	W309	Ind	LOC_Os01g12940	TTGG	22.84
Leu	W310	Ind	LOC_Os01g12940	TTGG	22.68
Leu	W311	Ind	LOC_Os01g12940	TTGG	22
Leu	W312	Ind	LOC_Os01g12940	TTGG	21.76
Leu	W313	Ind	LOC_Os01g12940	TTGG	21.57
Leu	W314	Ind	LOC_Os01g12940	TTGG	22.32
Leu	W315	Ind	LOC_Os01g12940	TTGG	21.91
Leu	W316	Ind	LOC_Os01g12940	AAGG	23.53
Leu	W317	Ind	LOC_Os01g12940	TTGG	21.7
Leu	W318	Ind	LOC_Os01g12940	TTGG	22.24
Leu	W319	Jap	LOC_Os01g12940	TTTT	23.48
Leu	W320	Ind	LOC_Os01g12940	TTGG	22.11
Leu	W321	Ind	LOC_Os01g12940	TTGG	22.12
Leu	W322	Ind	LOC_Os01g12940	TTGG	22.46
Leu	W323	Jap	LOC_Os01g12940	TTTT	23.5
Leu	W324	Jap	LOC_Os01g12940	TTTT	23.68
Leu	W325	Jap	LOC_Os01g12940	TTTT	22.82
Leu	W326	Jap	LOC_Os01g12940	TTTT	23.78
Leu	W327	Jap	LOC_Os01g12940	TTTT	23.34
Leu	W329	Jap	LOC_Os01g12940	TTGG	23.48
Ile	C001	Ind	LOC_Os01g19220	GGAA	22.63
Ile	C003	Jap	LOC_Os01g19220	AAGG	22.57
Ile	C004	Jap	LOC_Os01g19220	AAGG	21.56
Ile	C005	Jap	LOC_Os01g19220	AAGG	22.96
Ile	C006	Ind	LOC_Os01g19220	GGAA	21.43
Ile	C007	Ind	LOC_Os01g19220	GGAA	21.73
Ile	C008	Ind	LOC_Os01g19220	GGAA	22.6
Ile	C009	Ind	LOC_Os01g19220	GGGG	22.49
Ile	C010	Jap	LOC_Os01g19220	AAGG	22.48
Ile	C011	Ind	LOC_Os01g19220	GGGG	21.52
Ile	C012	Jap	LOC_Os01g19220	AAGG	22.62
Ile	C014	Jap	LOC_Os01g19220	AAGG	22.43
Ile	C016	Jap	LOC_Os01g19220	AAGG	21.52
Ile	C017	Jap	LOC_Os01g19220	AAGG	21.72
Ile	C018	Jap	LOC_Os01g19220	AAGG	21.23
Ile	C019	Ind	LOC_Os01g19220	GGGG	21.63
Ile	C020	Ind	LOC_Os01g19220	GGGG	21.21
Ile	C021	Ind	LOC_Os01g19220	GGGG	21.08
Ile	C022	Ind	LOC_Os01g19220	GGAA	20.9
Ile	C023	Jap	LOC_Os01g19220	AAGG	21.73
Ile	C024	Ind	LOC_Os01g19220	GGAA	21.33
Ile	C025	Ind	LOC_Os01g19220	GGGG	21.81
Ile	C026	Jap	LOC_Os01g19220	AAGG	22.09
Ile	C027	Ind	LOC_Os01g19220	GGGG	22.34
Ile	C028	Jap	LOC_Os01g19220	AAGG	21.64
Ile	C029	Jap	LOC_Os01g19220	GGGG	21.94
Ile	C030	Ind	LOC_Os01g19220	GGAA	21.04
Ile	C031	Ind	LOC_Os01g19220	GGAA	22.32
Ile	C032	Jap	LOC_Os01g19220	AAGG	21.61
Ile	C033	Ind	LOC_Os01g19220	GGAA	21.82
Ile	C034	Jap	LOC_Os01g19220	AAGG	22.55
Ile	C035	Jap	LOC_Os01g19220	AAGG	22.63
Ile	C036	Ind	LOC_Os01g19220	GGGG	22.45
Ile	C037	Ind	LOC_Os01g19220	GGGG	22.7
Ile	C038	Ind	LOC_Os01g19220	GGAA	22.56
Ile	C039	Ind	LOC_Os01g19220	GGGG	23.09
Ile	C040	Ind	LOC_Os01g19220	GGGG	22.62
Ile	C041	Ind	LOC_Os01g19220	GGGG	22.9
Ile	C042	Ind	LOC_Os01g19220	GGGG	22.85
Ile	C043	Ind	LOC_Os01g19220	GGGG	22.24
Ile	C044	Ind	LOC_Os01g19220	GGGG	22.44
Ile	C045	Ind	LOC_Os01g19220	GGAA	22.35
Ile	C046	Ind	LOC_Os01g19220	GGAA	22.49
Ile	C047	Ind	LOC_Os01g19220	GGGG	21.96
Ile	C048	Jap	LOC_Os01g19220	AAGG	23.04
Ile	C049	Ind	LOC_Os01g19220	GGAA	22.02
Ile	C050	Ind	LOC_Os01g19220	GGAA	22.11
Ile	C052	Jap	LOC_Os01g19220	AAGG	23.63
Ile	C053	Ind	LOC_Os01g19220	GGGG	22.47
Ile	C054	Jap	LOC_Os01g19220	AAGG	23.44
Ile	C055	Ind	LOC_Os01g19220	GGGG	23.79
Ile	C056	Jap	LOC_Os01g19220	AAGG	22.77
Ile	C057	Jap	LOC_Os01g19220	AAGG	23.01
Ile	C058	Ind	LOC_Os01g19220	GGGG	22.55
Ile	C059	Ind	LOC_Os01g19220	GGAA	23.12
Ile	C060	Ind	LOC_Os01g19220	GGGG	22.85
Ile	C061	Ind	LOC_Os01g19220	GGAA	22.78
Ile	C062	Ind	LOC_Os01g19220	GGGG	23.39
Ile	C063	Jap	LOC_Os01g19220	AAGG	24.19
Ile	C064	Jap	LOC_Os01g19220	AAGG	23.63
Ile	C065	Ind	LOC_Os01g19220	GGGG	22.85
Ile	C066	Ind	LOC_Os01g19220	GGAA	22.92
Ile	C067	Jap	LOC_Os01g19220	AAGG	23.09
Ile	C068	Ind	LOC_Os01g19220	GGGG	23.14
Ile	C069	Ind	LOC_Os01g19220	GGAA	23.19
Ile	C070	Jap	LOC_Os01g19220	AAGG	23.38
Ile	C071	Jap	LOC_Os01g19220	AAGG	22.48
Ile	C072	Ind	LOC_Os01g19220	GGGG	21.7
Ile	C073	Ind	LOC_Os01g19220	GGAA	20.65
Ile	C074	Jap	LOC_Os01g19220	AAGG	23.03
Ile	C075	Jap	LOC_Os01g19220	AAGG	22.47
Ile	C076	Ind	LOC_Os01g19220	GGGG	21.73
Ile	C077	Ind	LOC_Os01g19220	GGGG	21.42
Ile	C078	Ind	LOC_Os01g19220	GGGG	21.97
Ile	C079	Jap	LOC_Os01g19220	AAGG	22.24
Ile	C080	Ind	LOC_Os01g19220	GGGG	21.27
Ile	C081	Ind	LOC_Os01g19220	GGGG	21.66
Ile	C082	Jap	LOC_Os01g19220	AAGG	21.94
Ile	C083	Jap	LOC_Os01g19220	AAGG	21.88
Ile	C085	Jap	LOC_Os01g19220	AAGG	22.9
Ile	C087	Jap	LOC_Os01g19220	AAGG	22.72
Ile	C088	Ind	LOC_Os01g19220	GGGG	22.02
Ile	C089	Jap	LOC_Os01g19220	AAGG	21.59
Ile	C090	Ind	LOC_Os01g19220	GGAA	21.43
Ile	C091	Ind	LOC_Os01g19220	GGAA	21.68
Ile	C092	Ind	LOC_Os01g19220	GGAA	22.49
Ile	C093	Jap	LOC_Os01g19220	AAGG	23.74
Ile	C094	Ind	LOC_Os01g19220	GGGG	21.71
Ile	C095	Ind	LOC_Os01g19220	GGGG	21.55
Ile	C096	Ind	LOC_Os01g19220	GGAA	21.46
Ile	C097	Ind	LOC_Os01g19220	GGAA	21.3
Ile	C098	Ind	LOC_Os01g19220	GGGG	21.69
Ile	C099	Ind	LOC_Os01g19220	GGGG	22.29
Ile	C100	Ind	LOC_Os01g19220	GGAA	21.73
Ile	C101	Jap	LOC_Os01g19220	AAGG	22.77
Ile	C102	Ind	LOC_Os01g19220	GGAA	21.76
Ile	C103	Jap	LOC_Os01g19220	AAGG	22.22
Ile	C104	Ind	LOC_Os01g19220	GGGG	22.2
Ile	C105	Ind	LOC_Os01g19220	GGGG	21.69
Ile	C106	Jap	LOC_Os01g19220	AAGG	22.29
Ile	C107	Ind	LOC_Os01g19220	GGGG	21.47
Ile	C108	Ind	LOC_Os01g19220	GGGG	21.5
Ile	C109	Ind	LOC_Os01g19220	GGGG	21.68
Ile	C110	Ind	LOC_Os01g19220	GGGG	21.51
Ile	C111	Jap	LOC_Os01g19220	AAGG	21.38
Ile	C112	Ind	LOC_Os01g19220	GGAA	22.08
Ile	C113	Ind	LOC_Os01g19220	GGAA	22.06
Ile	C114	Ind	LOC_Os01g19220	GGAA	21.84
Ile	C115	Ind	LOC_Os01g19220	GGAA	22.21
Ile	C116	Jap	LOC_Os01g19220	AAGG	23.05
Ile	C117	Ind	LOC_Os01g19220	GGGG	21.74
Ile	C118	Ind	LOC_Os01g19220	GGGG	22.05
Ile	C119	Jap	LOC_Os01g19220	AAGG	23.03
Ile	C120	Jap	LOC_Os01g19220	AAGG	22.29
Ile	C121	Ind	LOC_Os01g19220	GGGG	22.01
Ile	C122	Ind	LOC_Os01g19220	GGAA	21.83
Ile	C123	Jap	LOC_Os01g19220	GGAA	21.84
Ile	C124	Ind	LOC_Os01g19220	GGGG	21.93
Ile	C125	Ind	LOC_Os01g19220	GGAA	20.9
Ile	C127	Ind	LOC_Os01g19220	GGAA	20.72
Ile	C128	Ind	LOC_Os01g19220	GGAA	20.44
Ile	C129	Ind	LOC_Os01g19220	GGAA	20.86
Ile	C130	Jap	LOC_Os01g19220	AAGG	20.71
Ile	C131	Ind	LOC_Os01g19220	GGAA	20.88
Ile	C132	Ind	LOC_Os01g19220	AAGG	20.97
Ile	C133	Jap	LOC_Os01g19220	AAGG	21.64
Ile	C134	Jap	LOC_Os01g19220	AAGG	21.53
Ile	C135	Ind	LOC_Os01g19220	GGGG	20.93
Ile	C136	Ind	LOC_Os01g19220	GGGG	20.84
Ile	C137	Jap	LOC_Os01g19220	AAGG	20.92
Ile	C138	Jap	LOC_Os01g19220	AAGG	21.53
Ile	C139	Ind	LOC_Os01g19220	GGAA	21.42
Ile	C140	Ind	LOC_Os01g19220	GGGG	21.03
Ile	C141	Ind	LOC_Os01g19220	GGGG	21.85
Ile	C142	Ind	LOC_Os01g19220	GGGG	21.39
Ile	C143	Ind	LOC_Os01g19220	GGGG	22.06
Ile	C144	Jap	LOC_Os01g19220	AAGG	22.65
Ile	C145	Ind	LOC_Os01g19220	GGAA	21.94
Ile	C146	Jap	LOC_Os01g19220	AAGG	22.41
Ile	C147	Ind	LOC_Os01g19220	GGAA	21.29
Ile	C148	Ind	LOC_Os01g19220	GGAA	21.84
Ile	C149	Jap	LOC_Os01g19220	AAGG	21.11
Ile	C150	Jap	LOC_Os01g19220	AAGG	22.1
Ile	C151	Ind	LOC_Os01g19220	GGAA	22.47
Ile	C152	Jap	LOC_Os01g19220	AAGG	22.27
Ile	C153	Jap	LOC_Os01g19220	AAGG	22
Ile	C154	Jap	LOC_Os01g19220	AAGG	20.73
Ile	C155	Ind	LOC_Os01g19220	GGGG	21.91
Ile	C156	Ind	LOC_Os01g19220	GGAA	21.03
Ile	C157	Ind	LOC_Os01g19220	GGAA	21.83
Ile	C158	Ind	LOC_Os01g19220	GGAA	21.21
Ile	C159	Ind	LOC_Os01g19220	GGGG	21.05
Ile	C160	Ind	LOC_Os01g19220	AAGG	21.41
Ile	C161	Ind	LOC_Os01g19220	GGGG	20.9
Ile	C162	Ind	LOC_Os01g19220	GGGG	21.32
Ile	C163	Ind	LOC_Os01g19220	GGGG	20.94
Ile	C164	Ind	LOC_Os01g19220	GGGG	20.8
Ile	C165	Ind	LOC_Os01g19220	GGAA	20.65
Ile	C166	Ind	LOC_Os01g19220	GGAA	21.14
Ile	C167	Ind	LOC_Os01g19220	GGGG	20.69
Ile	C168	Ind	LOC_Os01g19220	GGGG	20.41
Ile	C169	Ind	LOC_Os01g19220	GGGG	20.78
Ile	C170	Ind	LOC_Os01g19220	GGAA	21.47
Ile	C171	Jap	LOC_Os01g19220	AAGG	21.95
Ile	C172	Jap	LOC_Os01g19220	AAGG	22.23
Ile	C173	Ind	LOC_Os01g19220	GGGG	20.39
Ile	C174	Ind	LOC_Os01g19220	GGAA	20.62
Ile	C175	Ind	LOC_Os01g19220	GGAA	20.29
Ile	C176	Ind	LOC_Os01g19220	GGGG	21.56
Ile	C177	Jap	LOC_Os01g19220	AAGG	22.04
Ile	C178	Ind	LOC_Os01g19220	GGGG	21.52
Ile	C179	Jap	LOC_Os01g19220	AAGG	21.93
Ile	C180	Ind	LOC_Os01g19220	GGAA	21.06
Ile	C181	Jap	LOC_Os01g19220	AAGG	22.77
Ile	C182	Ind	LOC_Os01g19220	GGAA	22.64
Ile	C183	Ind	LOC_Os01g19220	GGAA	22.59
Ile	C184	Ind	LOC_Os01g19220	GGGG	22.63
Ile	C185	Jap	LOC_Os01g19220	AAGG	23.31
Ile	C186	Jap	LOC_Os01g19220	AAGG	23.75
Ile	C187	Jap	LOC_Os01g19220	AAGG	23.09
Ile	C188	Jap	LOC_Os01g19220	AAGG	22.24
Ile	C189	Jap	LOC_Os01g19220	AAGG	23.28
Ile	C190	Ind	LOC_Os01g19220	GGAA	22.26
Ile	C191	Ind	LOC_Os01g19220	GGGG	22.35
Ile	C192	Ind	LOC_Os01g19220	GGGG	22.6
Ile	C193	Ind	LOC_Os01g19220	GGAA	22.64
Ile	C194	Ind	LOC_Os01g19220	GGGG	22.38
Ile	C195	Jap	LOC_Os01g19220	AAGG	22.69
Ile	C196	Jap	LOC_Os01g19220	AAGG	23.08
Ile	C197	Ind	LOC_Os01g19220	GGGG	22.3
Ile	C198	Ind	LOC_Os01g19220	GGGG	23.27
Ile	C199	Ind	LOC_Os01g19220	GGAA	22.84
Ile	C200	Ind	LOC_Os01g19220	GGGG	22.56
Ile	C201	Ind	LOC_Os01g19220	GGGG	22.6
Ile	C202	Ind	LOC_Os01g19220	GGGG	22.51
Ile	C203	Ind	LOC_Os01g19220	GGGG	22.67
Ile	W001	Ind	LOC_Os01g19220	GGGG	22.79
Ile	W002	Jap	LOC_Os01g19220	AAGG	22.69
Ile	W003	Jap	LOC_Os01g19220	AAGG	22.69
Ile	W004	Jap	LOC_Os01g19220	AAGG	22.16
Ile	W005	Jap	LOC_Os01g19220	AAGG	22.35
Ile	W006	Jap	LOC_Os01g19220	AAGG	23.28
Ile	W007	Jap	LOC_Os01g19220	AAGG	22.52
Ile	W008	Jap	LOC_Os01g19220	AAGG	21.03
Ile	W009	Ind	LOC_Os01g19220	GGGG	20.71
Ile	W010	Jap	LOC_Os01g19220	AAGG	22.19
Ile	W011	Jap	LOC_Os01g19220	AAGG	20.85
Ile	W012	Jap	LOC_Os01g19220	AAGG	20.71
Ile	W013	Jap	LOC_Os01g19220	AAGG	20.44
Ile	W016	Jap	LOC_Os01g19220	AAGG	21.19
Ile	W017	Jap	LOC_Os01g19220	AAGG	20.55
Ile	W018	Jap	LOC_Os01g19220	AAGG	22.59
Ile	W019	Jap	LOC_Os01g19220	AAGG	20.89
Ile	W021	Jap	LOC_Os01g19220	AAGG	21.54
Ile	W022	Jap	LOC_Os01g19220	AAGG	20.75
Ile	W023	Ind	LOC_Os01g19220	GGAA	19.72
Ile	W024	Jap	LOC_Os01g19220	AAGG	22.36
Ile	W026	Ind	LOC_Os01g19220	GGGG	21.08
Ile	W027	Jap	LOC_Os01g19220	AAGG	20
Ile	W029	Ind	LOC_Os01g19220	GGGG	20.22
Ile	W030	Ind	LOC_Os01g19220	GGGG	21.03
Ile	W031	Ind	LOC_Os01g19220	GGGG	21.65
Ile	W032	Ind	LOC_Os01g19220	GGGG	21.05
Ile	W033	Ind	LOC_Os01g19220	GGAA	21.11
Ile	W035	Ind	LOC_Os01g19220	GGGG	22.01
Ile	W036	Ind	LOC_Os01g19220	GGAA	21.55
Ile	W038	Jap	LOC_Os01g19220	AAGG	20.9
Ile	W039	Ind	LOC_Os01g19220	GGGG	21.3
Ile	W040	Ind	LOC_Os01g19220	GGGG	21.42
Ile	W041	Jap	LOC_Os01g19220	AAGG	23.13
Ile	W043	Ind	LOC_Os01g19220	GGGG	21.63
Ile	W045	Jap	LOC_Os01g19220	AAGG	21.47
Ile	W046	Ind	LOC_Os01g19220	GGGG	21.88
Ile	W047	Jap	LOC_Os01g19220	AAGG	21.34
Ile	W051	Ind	LOC_Os01g19220	GGGG	20.64
Ile	W052	Jap	LOC_Os01g19220	AAGG	21.81
Ile	W053	Jap	LOC_Os01g19220	AAGG	21.68
Ile	W054	Ind	LOC_Os01g19220	GGAA	21.48
Ile	W056	Jap	LOC_Os01g19220	AAGG	22.01
Ile	W057	Jap	LOC_Os01g19220	AAGG	21.1
Ile	W058	Ind	LOC_Os01g19220	GGGG	21.52
Ile	W059	Jap	LOC_Os01g19220	AAGG	22.71
Ile	W060	Jap	LOC_Os01g19220	AAGG	20.74
Ile	W061	Jap	LOC_Os01g19220	AAGG	21.47
Ile	W062	Jap	LOC_Os01g19220	AAGG	20.95
Ile	W063	Jap	LOC_Os01g19220	AAGG	21.32
Ile	W064	Jap	LOC_Os01g19220	AAGG	21.31
Ile	W065	Jap	LOC_Os01g19220	AAGG	21.1
Ile	W066	Ind	LOC_Os01g19220	GGAA	20.95
Ile	W067	Jap	LOC_Os01g19220	AAGG	21.19
Ile	W068	Jap	LOC_Os01g19220	AAGG	21.45
Ile	W070	Ind	LOC_Os01g19220	GGGG	21.92
Ile	W071	Ind	LOC_Os01g19220	GGGG	22.05
Ile	W073	Ind	LOC_Os01g19220	GGGG	20.55
Ile	W074	Ind	LOC_Os01g19220	GGGG	21.83
Ile	W075	Ind	LOC_Os01g19220	GGGG	21.25
Ile	W078	Ind	LOC_Os01g19220	GGGG	22.4
Ile	W080	Ind	LOC_Os01g19220	GGAA	22.24
Ile	W082	Jap	LOC_Os01g19220	AAGG	23.44
Ile	W083	Ind	LOC_Os01g19220	GGAA	22.32
Ile	W084	Ind	LOC_Os01g19220	GGGG	22.06
Ile	W085	Ind	LOC_Os01g19220	GGGG	22.7
Ile	W086	Ind	LOC_Os01g19220	GGGG	23.82
Ile	W087	Ind	LOC_Os01g19220	GGAA	23.72
Ile	W088	Jap	LOC_Os01g19220	AAGG	24.94
Ile	W089	Ind	LOC_Os01g19220	GGAA	22.22
Ile	W093	Ind	LOC_Os01g19220	GGAA	22.28
Ile	W101	Ind	LOC_Os01g19220	GGGG	21.97
Ile	W102	Jap	LOC_Os01g19220	AAGG	23.15
Ile	W109	Jap	LOC_Os01g19220	AAGG	21.69
Ile	W110	Jap	LOC_Os01g19220	AAGG	23.31
Ile	W111	Ind	LOC_Os01g19220	GGGG	21.18
Ile	W112	Ind	LOC_Os01g19220	GGAA	20.34
Ile	W113	Jap	LOC_Os01g19220	AAGG	23.64
Ile	W114	Ind	LOC_Os01g19220	GGGG	21
Ile	W116	Jap	LOC_Os01g19220	AAGG	22.36
Ile	W117	Jap	LOC_Os01g19220	AAGG	21.76
Ile	W118	Jap	LOC_Os01g19220	AAGG	23.55
Ile	W119	Jap	LOC_Os01g19220	AAGG	23.22
Ile	W120	Jap	LOC_Os01g19220	AAGG	22.51
Ile	W122	Jap	LOC_Os01g19220	AAGG	22.77
Ile	W123	Jap	LOC_Os01g19220	AAGG	23.31
Ile	W124	Ind	LOC_Os01g19220	GGAA	21.61
Ile	W126	Ind	LOC_Os01g19220	GGAA	22.06
Ile	W127	Jap	LOC_Os01g19220	AAGG	23.43
Ile	W130	Jap	LOC_Os01g19220	AAGG	22.3
Ile	W132	Ind	LOC_Os01g19220	GGGG	22.75
Ile	W133	Ind	LOC_Os01g19220	GGAA	23.38
Ile	W137	Ind	LOC_Os01g19220	GGGG	21.3
Ile	W138	Ind	LOC_Os01g19220	GGAA	20.64
Ile	W139	Jap	LOC_Os01g19220	AAGG	22.51
Ile	W143	Jap	LOC_Os01g19220	AAGG	22.54
Ile	W144	Ind	LOC_Os01g19220	GGGG	21.37
Ile	W145	Ind	LOC_Os01g19220	GGGG	20.79
Ile	W146	Ind	LOC_Os01g19220	GGAA	20.92
Ile	W147	Ind	LOC_Os01g19220	GGGG	21.02
Ile	W148	Ind	LOC_Os01g19220	GGGG	20.77
Ile	W149	Ind	LOC_Os01g19220	GGAA	22.42
Ile	W150	Ind	LOC_Os01g19220	GGAA	21.03
Ile	W151	Ind	LOC_Os01g19220	GGGG	22.64
Ile	W152	Ind	LOC_Os01g19220	GGAA	21.26
Ile	W153	Ind	LOC_Os01g19220	GGAA	21.06
Ile	W154	Ind	LOC_Os01g19220	GGGG	20.92
Ile	W155	Ind	LOC_Os01g19220	GGAA	21.25
Ile	W156	Ind	LOC_Os01g19220	GGGG	20.6
Ile	W157	Ind	LOC_Os01g19220	AAGG	21.04
Ile	W159	Ind	LOC_Os01g19220	GGGG	19.85
Ile	W160	Jap	LOC_Os01g19220	AAGG	21.68
Ile	W161	Ind	LOC_Os01g19220	GGGG	20.87
Ile	W162	Jap	LOC_Os01g19220	AAGG	21.95
Ile	W163	Ind	LOC_Os01g19220	GGGG	21.22
Ile	W164	Ind	LOC_Os01g19220	GGGG	20.83
Ile	W165	Ind	LOC_Os01g19220	GGGG	21.26
Ile	W166	Ind	LOC_Os01g19220	GGGG	19.48
Ile	W167	Ind	LOC_Os01g19220	GGGG	19.42
Ile	W168	Ind	LOC_Os01g19220	GGGG	21.46
Ile	W169	Ind	LOC_Os01g19220	GGGG	20.4
Ile	W170	Ind	LOC_Os01g19220	GGGG	21.77
Ile	W171	Ind	LOC_Os01g19220	GGGG	20.71
Ile	W172	Ind	LOC_Os01g19220	GGGG	20.3
Ile	W173	Jap	LOC_Os01g19220	AAGG	22.16
Ile	W174	Ind	LOC_Os01g19220	GGGG	21.02
Ile	W176	Ind	LOC_Os01g19220	GGGG	19.88
Ile	W177	Ind	LOC_Os01g19220	GGGG	20.41
Ile	W178	Ind	LOC_Os01g19220	GGGG	20.21
Ile	W179	Ind	LOC_Os01g19220	GGGG	19.45
Ile	W180	Ind	LOC_Os01g19220	GGAA	19.53
Ile	W181	Ind	LOC_Os01g19220	GGAA	21.15
Ile	W182	Ind	LOC_Os01g19220	GGAA	20.32
Ile	W183	Ind	LOC_Os01g19220	GGAA	20.04
Ile	W184	Ind	LOC_Os01g19220	GGGG	20.4
Ile	W185	Ind	LOC_Os01g19220	GGGG	20.76
Ile	W186	Ind	LOC_Os01g19220	GGGG	21.89
Ile	W187	Ind	LOC_Os01g19220	GGGG	22.27
Ile	W188	Ind	LOC_Os01g19220	AAGG	20.08
Ile	W189	Ind	LOC_Os01g19220	GGGG	20.22
Ile	W193	Jap	LOC_Os01g19220	AAGG	21.93
Ile	W194	Ind	LOC_Os01g19220	GGAA	21.9
Ile	W195	Ind	LOC_Os01g19220	GGGG	21.88
Ile	W197	Ind	LOC_Os01g19220	GGGG	20.84
Ile	W198	Ind	LOC_Os01g19220	GGGG	21.72
Ile	W199	Ind	LOC_Os01g19220	GGGG	21.32
Ile	W200	Ind	LOC_Os01g19220	GGAA	21.2
Ile	W201	Ind	LOC_Os01g19220	GGAA	21.76
Ile	W202	Ind	LOC_Os01g19220	GGAA	22.2
Ile	W203	Ind	LOC_Os01g19220	GGAA	21.48
Ile	W204	Ind	LOC_Os01g19220	GGGG	20.97
Ile	W205	Ind	LOC_Os01g19220	GGGG	21.55
Ile	W206	Ind	LOC_Os01g19220	GGGG	21.46
Ile	W207	Jap	LOC_Os01g19220	AAGG	22.46
Ile	W208	Jap	LOC_Os01g19220	GGGG	23.59
Ile	W209	Jap	LOC_Os01g19220	GGGG	21.94
Ile	W210	Ind	LOC_Os01g19220	GGAA	21.35
Ile	W211	Ind	LOC_Os01g19220	GGGG	20.78
Ile	W212	Ind	LOC_Os01g19220	GGGG	21.56
Ile	W213	Ind	LOC_Os01g19220	GGGG	20.63
Ile	W216	Ind	LOC_Os01g19220	GGGG	21.06
Ile	W217	Ind	LOC_Os01g19220	GGGG	21.67
Ile	W218	Ind	LOC_Os01g19220	GGGG	22.12
Ile	W221	Ind	LOC_Os01g19220	GGGG	22.72
Ile	W222	Ind	LOC_Os01g19220	GGGG	22.77
Ile	W223	Ind	LOC_Os01g19220	GGGG	21.92
Ile	W224	Ind	LOC_Os01g19220	GGGG	21.76
Ile	W225	Jap	LOC_Os01g19220	AAGG	23.66
Ile	W226	Jap	LOC_Os01g19220	AAGG	23.94
Ile	W227	Ind	LOC_Os01g19220	GGAA	22.45
Ile	W228	Ind	LOC_Os01g19220	GGGG	21.87
Ile	W229	Ind	LOC_Os01g19220	GGGG	21.9
Ile	W230	Ind	LOC_Os01g19220	GGGG	22.65
Ile	W231	Ind	LOC_Os01g19220	GGGG	22.3
Ile	W233	Ind	LOC_Os01g19220	GGGG	23.27
Ile	W234	Ind	LOC_Os01g19220	GGGG	22.34
Ile	W235	Ind	LOC_Os01g19220	GGGG	21.28
Ile	W236	Ind	LOC_Os01g19220	GGAA	23.08
Ile	W237	Ind	LOC_Os01g19220	GGAA	22.62
Ile	W238	Ind	LOC_Os01g19220	GGAA	22.89
Ile	W239	Ind	LOC_Os01g19220	GGAA	21.91
Ile	W240	Ind	LOC_Os01g19220	GGAA	21.88
Ile	W241	Ind	LOC_Os01g19220	GGAA	21.85
Ile	W242	Ind	LOC_Os01g19220	GGGG	21.98
Ile	W243	Ind	LOC_Os01g19220	GGAA	22.86
Ile	W245	Ind	LOC_Os01g19220	GGAA	21.31
Ile	W246	Ind	LOC_Os01g19220	GGAA	21.57
Ile	W247	Ind	LOC_Os01g19220	GGAA	21.65
Ile	W248	Ind	LOC_Os01g19220	GGGG	22.41
Ile	W249	Jap	LOC_Os01g19220	AAGG	23.11
Ile	W250	Jap	LOC_Os01g19220	AAGG	22.02
Ile	W251	Jap	LOC_Os01g19220	AAGG	23.53
Ile	W253	Jap	LOC_Os01g19220	AAGG	23.07
Ile	W254	Jap	LOC_Os01g19220	AAGG	23.6
Ile	W257	Jap	LOC_Os01g19220	AAGG	23.19
Ile	W259	Ind	LOC_Os01g19220	GGAA	21.92
Ile	W260	Jap	LOC_Os01g19220	AAGG	22.85
Ile	W262	Ind	LOC_Os01g19220	GGGG	22.26
Ile	W263	Ind	LOC_Os01g19220	GGGG	21.31
Ile	W264	Ind	LOC_Os01g19220	GGAA	22.66
Ile	W265	Ind	LOC_Os01g19220	GGGG	21.85
Ile	W266	Ind	LOC_Os01g19220	GGGG	20.85
Ile	W267	Ind	LOC_Os01g19220	GGGG	21.77
Ile	W268	Ind	LOC_Os01g19220	GGGG	22.06
Ile	W269	Ind	LOC_Os01g19220	GGAA	21.19
Ile	W270	Ind	LOC_Os01g19220	GGGG	22.35
Ile	W271	Ind	LOC_Os01g19220	GGAA	21.1
Ile	W272	Ind	LOC_Os01g19220	GGAA	21.32
Ile	W273	Jap	LOC_Os01g19220	AAGG	22.52
Ile	W274	Ind	LOC_Os01g19220	GGAA	21.98
Ile	W275	Jap	LOC_Os01g19220	AAGG	21.93
Ile	W276	Ind	LOC_Os01g19220	GGGG	22.39
Ile	W281	Jap	LOC_Os01g19220	AAGG	22.08
Ile	W282	Ind	LOC_Os01g19220	GGGG	21.1
Ile	W283	Jap	LOC_Os01g19220	AAGG	21.54
Ile	W284	Jap	LOC_Os01g19220	AAGG	21.4
Ile	W285	Jap	LOC_Os01g19220	AAGG	22.4
Ile	W288	Jap	LOC_Os01g19220	AAGG	21.88
Ile	W289	Ind	LOC_Os01g19220	GGGG	22.11
Ile	W290	Jap	LOC_Os01g19220	AAGG	22.83
Ile	W291	Ind	LOC_Os01g19220	GGGG	21.56
Ile	W293	Ind	LOC_Os01g19220	GGGG	21.5
Ile	W295	Ind	LOC_Os01g19220	GGAA	20.02
Ile	W298	Ind	LOC_Os01g19220	GGGG	20.93
Ile	W299	Ind	LOC_Os01g19220	GGAA	21.41
Ile	W300	Jap	LOC_Os01g19220	AAGG	21.5
Ile	W301	Ind	LOC_Os01g19220	GGAA	19.78
Ile	W302	Jap	LOC_Os01g19220	AAGG	20.3
Ile	W303	Jap	LOC_Os01g19220	AAGG	21.13
Ile	W305	Jap	LOC_Os01g19220	AAGG	21.71
Ile	W307	Ind	LOC_Os01g19220	GGGG	20.66
Ile	W308	Ind	LOC_Os01g19220	GGGG	20.76
Ile	W309	Ind	LOC_Os01g19220	GGAA	21.11
Ile	W310	Ind	LOC_Os01g19220	GGGG	21.19
Ile	W311	Ind	LOC_Os01g19220	GGAA	20.19
Ile	W312	Ind	LOC_Os01g19220	GGAA	20.08
Ile	W313	Ind	LOC_Os01g19220	GGGG	19.85
Ile	W314	Ind	LOC_Os01g19220	GGAA	20.67
Ile	W315	Ind	LOC_Os01g19220	GGAA	20.07
Ile	W316	Ind	LOC_Os01g19220	GGGG	21.86
Ile	W317	Ind	LOC_Os01g19220	GGAA	20.12
Ile	W318	Ind	LOC_Os01g19220	GGAA	20.45
Ile	W319	Jap	LOC_Os01g19220	AAGG	21.82
Ile	W320	Ind	LOC_Os01g19220	GGGG	20.4
Ile	W321	Ind	LOC_Os01g19220	GGGG	20.31
Ile	W322	Ind	LOC_Os01g19220	GGAA	20.71
Ile	W323	Jap	LOC_Os01g19220	AAGG	21.61
Ile	W324	Jap	LOC_Os01g19220	AAGG	21.62
Ile	W325	Jap	LOC_Os01g19220	AAGG	21.28
Ile	W326	Jap	LOC_Os01g19220	AAGG	21.87
Ile	W327	Jap	LOC_Os01g19220	AAGG	21.67
Ile	W329	Jap	LOC_Os01g19220	AAGG	21.76
Arg	C001	Ind	LOC_Os05g49760	AAGG	17.88
Arg	C003	Jap	LOC_Os05g49760	GGAA	18.65
Arg	C004	Jap	LOC_Os05g49760	GGAA	18
Arg	C005	Jap	LOC_Os05g49760	AAGG	19.1
Arg	C006	Ind	LOC_Os05g49760	AAGG	17.4
Arg	C007	Ind	LOC_Os05g49760	AAGG	17.06
Arg	C008	Ind	LOC_Os05g49760	AAGG	18.53
Arg	C009	Ind	LOC_Os05g49760	AAGG	18.11
Arg	C010	Jap	LOC_Os05g49760	AAGG	18.14
Arg	C011	Ind	LOC_Os05g49760	AAGG	16.75
Arg	C012	Jap	LOC_Os05g49760	GGAA	18.69
Arg	C014	Jap	LOC_Os05g49760	GGAA	17.76
Arg	C016	Jap	LOC_Os05g49760	GGAA	17.91
Arg	C017	Jap	LOC_Os05g49760	GGAA	17.18
Arg	C018	Jap	LOC_Os05g49760	GGAA	17.54
Arg	C019	Ind	LOC_Os05g49760	AAGG	17.07
Arg	C020	Ind	LOC_Os05g49760	AAGG	16.76
Arg	C021	Ind	LOC_Os05g49760	AAGG	16.19
Arg	C022	Ind	LOC_Os05g49760	AAGG	16.52
Arg	C023	Jap	LOC_Os05g49760	GGAA	17
Arg	C024	Ind	LOC_Os05g49760	AAGG	16.29
Arg	C025	Ind	LOC_Os05g49760	AAGG	16.94
Arg	C026	Jap	LOC_Os05g49760	GGAA	17.46
Arg	C027	Ind	LOC_Os05g49760	GGGG	17.37
Arg	C028	Jap	LOC_Os05g49760	GGAA	17.47
Arg	C029	Jap	LOC_Os05g49760	GGAA	17.08
Arg	C030	Ind	LOC_Os05g49760	AAGG	16.19
Arg	C031	Ind	LOC_Os05g49760	GGGG	18.81
Arg	C032	Jap	LOC_Os05g49760	GGAA	16.79
Arg	C033	Ind	LOC_Os05g49760	AAGG	17.47
Arg	C034	Jap	LOC_Os05g49760	GGAA	17.07
Arg	C035	Jap	LOC_Os05g49760	GGAA	17.25
Arg	C036	Ind	LOC_Os05g49760	AAGG	19
Arg	C037	Ind	LOC_Os05g49760	AAGG	18.71
Arg	C038	Ind	LOC_Os05g49760	AAGG	18.71
Arg	C039	Ind	LOC_Os05g49760	AAGG	18.6
Arg	C040	Ind	LOC_Os05g49760	AAGG	18.62
Arg	C041	Ind	LOC_Os05g49760	AAGG	18.75
Arg	C042	Ind	LOC_Os05g49760	AAGG	18.49
Arg	C043	Ind	LOC_Os05g49760	AAGG	18.19
Arg	C044	Ind	LOC_Os05g49760	GGAA	18.5
Arg	C045	Ind	LOC_Os05g49760	GGGG	18.35
Arg	C046	Ind	LOC_Os05g49760	GGGG	18.66
Arg	C047	Ind	LOC_Os05g49760	AAGG	18.25
Arg	C048	Jap	LOC_Os05g49760	GGAA	18.35
Arg	C049	Ind	LOC_Os05g49760	GGGG	18.29
Arg	C050	Ind	LOC_Os05g49760	GGGG	18.11
Arg	C052	Jap	LOC_Os05g49760	GGAA	18.83
Arg	C053	Ind	LOC_Os05g49760	GGGG	18.19
Arg	C054	Jap	LOC_Os05g49760	GGAA	18.91
Arg	C055	Ind	LOC_Os05g49760	AAGG	19.36
Arg	C056	Jap	LOC_Os05g49760	GGAA	18.7
Arg	C057	Jap	LOC_Os05g49760	GGAA	18.85
Arg	C058	Ind	LOC_Os05g49760	AAGG	18.34
Arg	C059	Ind	LOC_Os05g49760	AAGG	18.85
Arg	C060	Ind	LOC_Os05g49760	AAGG	19
Arg	C061	Ind	LOC_Os05g49760	GGGG	18.69
Arg	C062	Ind	LOC_Os05g49760	AAGG	19.1
Arg	C063	Jap	LOC_Os05g49760	GGAA	21.36
Arg	C064	Jap	LOC_Os05g49760	GGAA	19.15
Arg	C065	Ind	LOC_Os05g49760	AAGG	18.26
Arg	C066	Ind	LOC_Os05g49760	AAGG	18.79
Arg	C067	Jap	LOC_Os05g49760	GGAA	18.57
Arg	C068	Ind	LOC_Os05g49760	AAGG	18.75
Arg	C069	Ind	LOC_Os05g49760	GGGG	18.44
Arg	C070	Jap	LOC_Os05g49760	GGAA	18.85
Arg	C071	Jap	LOC_Os05g49760	GGAA	17.47
Arg	C072	Ind	LOC_Os05g49760	AAGG	16.9
Arg	C073	Ind	LOC_Os05g49760	AAGG	17
Arg	C074	Jap	LOC_Os05g49760	GGGG	19.5
Arg	C075	Jap	LOC_Os05g49760	GGAA	17.72
Arg	C076	Ind	LOC_Os05g49760	AAGG	17.41
Arg	C077	Ind	LOC_Os05g49760	AAGG	17.5
Arg	C078	Ind	LOC_Os05g49760	AAGG	18.67
Arg	C079	Jap	LOC_Os05g49760	GGAA	17.64
Arg	C080	Ind	LOC_Os05g49760	AAGG	17.65
Arg	C081	Ind	LOC_Os05g49760	AAGG	17.31
Arg	C082	Jap	LOC_Os05g49760	GGAA	17.47
Arg	C083	Jap	LOC_Os05g49760	GGAA	17.94
Arg	C085	Jap	LOC_Os05g49760	GGAA	19.16
Arg	C087	Jap	LOC_Os05g49760	GGAA	18.88
Arg	C088	Ind	LOC_Os05g49760	AAGG	19.75
Arg	C089	Jap	LOC_Os05g49760	GGAA	17.23
Arg	C090	Ind	LOC_Os05g49760	AAGG	16.54
Arg	C091	Ind	LOC_Os05g49760	AAGG	17.77
Arg	C092	Ind	LOC_Os05g49760	AAGG	18.61
Arg	C093	Jap	LOC_Os05g49760	GGAA	18.99
Arg	C094	Ind	LOC_Os05g49760	AAGG	17.33
Arg	C095	Ind	LOC_Os05g49760	AAGG	18.09
Arg	C096	Ind	LOC_Os05g49760	AAGG	17.71
Arg	C097	Ind	LOC_Os05g49760	AAGG	17.18
Arg	C098	Ind	LOC_Os05g49760	GGGG	18.23
Arg	C099	Ind	LOC_Os05g49760	AAGG	18.46
Arg	C100	Ind	LOC_Os05g49760	AAGG	17.56
Arg	C101	Jap	LOC_Os05g49760	GGAA	18.21
Arg	C102	Ind	LOC_Os05g49760	GGGG	17.22
Arg	C103	Jap	LOC_Os05g49760	GGAA	17.82
Arg	C104	Ind	LOC_Os05g49760	AAGG	17.81
Arg	C105	Ind	LOC_Os05g49760	AAGG	17.74
Arg	C106	Jap	LOC_Os05g49760	GGAA	18.26
Arg	C107	Ind	LOC_Os05g49760	AAGG	18.05
Arg	C108	Ind	LOC_Os05g49760	AAGG	17.91
Arg	C109	Ind	LOC_Os05g49760	AAGG	17.27
Arg	C110	Ind	LOC_Os05g49760	AAGG	18.1
Arg	C111	Jap	LOC_Os05g49760	GGAA	18.78
Arg	C112	Ind	LOC_Os05g49760	AAGG	18.86
Arg	C113	Ind	LOC_Os05g49760	AAGG	18.7
Arg	C114	Ind	LOC_Os05g49760	AAGG	17.46
Arg	C115	Ind	LOC_Os05g49760	AAGG	17.64
Arg	C116	Jap	LOC_Os05g49760	GGAA	18.25
Arg	C117	Ind	LOC_Os05g49760	AAGG	18.36
Arg	C118	Ind	LOC_Os05g49760	GGGG	17.21
Arg	C119	Jap	LOC_Os05g49760	GGAA	17.94
Arg	C120	Jap	LOC_Os05g49760	GGAA	18.46
Arg	C121	Ind	LOC_Os05g49760	AAGG	18.35
Arg	C122	Ind	LOC_Os05g49760	AAGG	18.71
Arg	C123	Jap	LOC_Os05g49760	GGAA	19.22
Arg	C124	Ind	LOC_Os05g49760	GGAA	19.23
Arg	C125	Ind	LOC_Os05g49760	AAGG	17.6
Arg	C127	Ind	LOC_Os05g49760	AAGG	17.43
Arg	C128	Ind	LOC_Os05g49760	AAGG	16.97
Arg	C129	Ind	LOC_Os05g49760	AAGG	17.38
Arg	C130	Jap	LOC_Os05g49760	GGAA	16.94
Arg	C131	Ind	LOC_Os05g49760	AAGG	17.52
Arg	C132	Ind	LOC_Os05g49760	AAGG	19.59
Arg	C133	Jap	LOC_Os05g49760	GGAA	17.54
Arg	C134	Jap	LOC_Os05g49760	GGAA	18.3
Arg	C135	Ind	LOC_Os05g49760	AAGG	18.21
Arg	C136	Ind	LOC_Os05g49760	AAGG	17.82
Arg	C137	Jap	LOC_Os05g49760	GGAA	18.06
Arg	C138	Jap	LOC_Os05g49760	GGAA	17.92
Arg	C139	Ind	LOC_Os05g49760	AAGG	19.42
Arg	C140	Ind	LOC_Os05g49760	AAGG	17.79
Arg	C141	Ind	LOC_Os05g49760	AAGG	19.34
Arg	C142	Ind	LOC_Os05g49760	AAGG	18.32
Arg	C143	Ind	LOC_Os05g49760	AAGG	19.44
Arg	C144	Jap	LOC_Os05g49760	GGAA	18.57
Arg	C145	Ind	LOC_Os05g49760	AAGG	18.28
Arg	C146	Jap	LOC_Os05g49760	GGAA	19.18
Arg	C147	Ind	LOC_Os05g49760	GGGG	17.21
Arg	C148	Ind	LOC_Os05g49760	GGGG	19
Arg	C149	Jap	LOC_Os05g49760	GGAA	17.62
Arg	C150	Jap	LOC_Os05g49760	GGAA	18.65
Arg	C151	Ind	LOC_Os05g49760	AAGG	18.75
Arg	C152	Jap	LOC_Os05g49760	GGAA	19.46
Arg	C153	Jap	LOC_Os05g49760	GGAA	17.93
Arg	C154	Jap	LOC_Os05g49760	GGAA	17.61
Arg	C155	Ind	LOC_Os05g49760	AAGG	18.61
Arg	C156	Ind	LOC_Os05g49760	AAGG	17.49
Arg	C157	Ind	LOC_Os05g49760	GGGG	17.77
Arg	C158	Ind	LOC_Os05g49760	AAGG	17.38
Arg	C159	Ind	LOC_Os05g49760	AAGG	16.95
Arg	C160	Ind	LOC_Os05g49760	GGGG	16.88
Arg	C161	Ind	LOC_Os05g49760	AAGG	17.03
Arg	C162	Ind	LOC_Os05g49760	AAGG	17.88
Arg	C163	Ind	LOC_Os05g49760	GGAA	16.85
Arg	C164	Ind	LOC_Os05g49760	GGAA	17.93
Arg	C165	Ind	LOC_Os05g49760	AAGG	17.86
Arg	C166	Ind	LOC_Os05g49760	AAGG	17.3
Arg	C167	Ind	LOC_Os05g49760	AAGG	17.82
Arg	C168	Ind	LOC_Os05g49760	AAGG	17.57
Arg	C169	Ind	LOC_Os05g49760	GGGG	17.01
Arg	C170	Ind	LOC_Os05g49760	AAGG	17.05
Arg	C171	Jap	LOC_Os05g49760	GGAA	17.91
Arg	C172	Jap	LOC_Os05g49760	GGAA	17.75
Arg	C173	Ind	LOC_Os05g49760	AAGG	16.69
Arg	C174	Ind	LOC_Os05g49760	GGGG	16.92
Arg	C175	Ind	LOC_Os05g49760	GGGG	16.71
Arg	C176	Ind	LOC_Os05g49760	AAGG	17.99
Arg	C177	Jap	LOC_Os05g49760	GGAA	18.67
Arg	C178	Ind	LOC_Os05g49760	AAGG	18.47
Arg	C179	Jap	LOC_Os05g49760	GGAA	19.33
Arg	C180	Ind	LOC_Os05g49760	AAGG	18.57
Arg	C181	Jap	LOC_Os05g49760	GGAA	18.68
Arg	C182	Ind	LOC_Os05g49760	AAGG	19.23
Arg	C183	Ind	LOC_Os05g49760	AAGG	18.93
Arg	C184	Ind	LOC_Os05g49760	AAGG	18.82
Arg	C185	Jap	LOC_Os05g49760	GGAA	19
Arg	C186	Jap	LOC_Os05g49760	GGGG	19.3
Arg	C187	Jap	LOC_Os05g49760	GGAA	19.88
Arg	C188	Jap	LOC_Os05g49760	GGAA	18.56
Arg	C189	Jap	LOC_Os05g49760	GGAA	18.76
Arg	C190	Ind	LOC_Os05g49760	AAGG	18.62
Arg	C191	Ind	LOC_Os05g49760	AAGG	18.72
Arg	C192	Ind	LOC_Os05g49760	GGGG	19.35
Arg	C193	Ind	LOC_Os05g49760	GGGG	19.12
Arg	C194	Ind	LOC_Os05g49760	AAGG	18.65
Arg	C195	Jap	LOC_Os05g49760	GGAA	18.52
Arg	C196	Jap	LOC_Os05g49760	GGAA	19.48
Arg	C197	Ind	LOC_Os05g49760	AAGG	18.64
Arg	C198	Ind	LOC_Os05g49760	AAGG	19.55
Arg	C199	Ind	LOC_Os05g49760	AAGG	19.19
Arg	C200	Ind	LOC_Os05g49760	AAGG	19.7
Arg	C201	Ind	LOC_Os05g49760	AAGG	18.65
Arg	C202	Ind	LOC_Os05g49760	GGGG	18.84
Arg	C203	Ind	LOC_Os05g49760	AAGG	18.8
Arg	W001	Ind	LOC_Os05g49760	AAGG	19.05
Arg	W002	Jap	LOC_Os05g49760	AAGG	19.22
Arg	W003	Jap	LOC_Os05g49760	GGAA	18.5
Arg	W004	Jap	LOC_Os05g49760	AAGG	18.43
Arg	W005	Jap	LOC_Os05g49760	GGAA	18.06
Arg	W006	Jap	LOC_Os05g49760	GGAA	20.16
Arg	W007	Jap	LOC_Os05g49760	AAGG	18.58
Arg	W008	Jap	LOC_Os05g49760	AAGG	18.17
Arg	W009	Ind	LOC_Os05g49760	AAGG	17.4
Arg	W010	Jap	LOC_Os05g49760	GGAA	19.6
Arg	W011	Jap	LOC_Os05g49760	GGAA	18.14
Arg	W012	Jap	LOC_Os05g49760	GGAA	18.63
Arg	W013	Jap	LOC_Os05g49760	GGAA	17.84
Arg	W016	Jap	LOC_Os05g49760	GGAA	19.71
Arg	W017	Jap	LOC_Os05g49760	GGAA	16.85
Arg	W018	Jap	LOC_Os05g49760	GGAA	19.78
Arg	W019	Jap	LOC_Os05g49760	GGAA	18.26
Arg	W021	Jap	LOC_Os05g49760	GGGG	18.38
Arg	W022	Jap	LOC_Os05g49760	AAGG	17.44
Arg	W023	Ind	LOC_Os05g49760	GGGG	16.51
Arg	W024	Jap	LOC_Os05g49760	AAGG	18.58
Arg	W026	Ind	LOC_Os05g49760	AAGG	17.57
Arg	W027	Jap	LOC_Os05g49760	GGAA	17.2
Arg	W029	Ind	LOC_Os05g49760	AAGG	15.79
Arg	W030	Ind	LOC_Os05g49760	GGGG	17.97
Arg	W031	Ind	LOC_Os05g49760	AAGG	18.79
Arg	W032	Ind	LOC_Os05g49760	AAGG	18.13
Arg	W033	Ind	LOC_Os05g49760	AAGG	18.18
Arg	W035	Ind	LOC_Os05g49760	GGGG	18.61
Arg	W036	Ind	LOC_Os05g49760	AAGG	18.25
Arg	W038	Jap	LOC_Os05g49760	GGAA	17.18
Arg	W039	Ind	LOC_Os05g49760	AAGG	17.84
Arg	W040	Ind	LOC_Os05g49760	GGGG	17.98
Arg	W041	Jap	LOC_Os05g49760	GGAA	19.89
Arg	W043	Ind	LOC_Os05g49760	AAGG	17.26
Arg	W045	Jap	LOC_Os05g49760	GGAA	18.72
Arg	W046	Ind	LOC_Os05g49760	AAGG	18.15
Arg	W047	Jap	LOC_Os05g49760	GGAA	18.28
Arg	W051	Ind	LOC_Os05g49760	AAGG	17.18
Arg	W052	Jap	LOC_Os05g49760	GGAA	18.9
Arg	W053	Jap	LOC_Os05g49760	GGAA	18.18
Arg	W054	Ind	LOC_Os05g49760	AAGG	17.77
Arg	W056	Jap	LOC_Os05g49760	GGAA	18.18
Arg	W057	Jap	LOC_Os05g49760	GGAA	18.21
Arg	W058	Ind	LOC_Os05g49760	AAGG	19.15
Arg	W059	Jap	LOC_Os05g49760	GGAA	18
Arg	W060	Jap	LOC_Os05g49760	GGAA	17.69
Arg	W061	Jap	LOC_Os05g49760	GGAA	19.76
Arg	W062	Jap	LOC_Os05g49760	GGAA	17.41
Arg	W063	Jap	LOC_Os05g49760	GGAA	18.16
Arg	W064	Jap	LOC_Os05g49760	GGAA	19.79
Arg	W065	Jap	LOC_Os05g49760	GGAA	18.05
Arg	W066	Ind	LOC_Os05g49760	GGGG	17.02
Arg	W067	Jap	LOC_Os05g49760	AAGG	18.43
Arg	W068	Jap	LOC_Os05g49760	GGAA	18.86
Arg	W070	Ind	LOC_Os05g49760	GGGG	18.07
Arg	W071	Ind	LOC_Os05g49760	AAGG	19.33
Arg	W073	Ind	LOC_Os05g49760	GGGG	16.48
Arg	W074	Ind	LOC_Os05g49760	AAGG	18.31
Arg	W075	Ind	LOC_Os05g49760	AAGG	17.37
Arg	W078	Ind	LOC_Os05g49760	GGGG	18.07
Arg	W080	Ind	LOC_Os05g49760	AAGG	18.37
Arg	W082	Jap	LOC_Os05g49760	GGAA	19.77
Arg	W083	Ind	LOC_Os05g49760	AAGG	17.38
Arg	W084	Ind	LOC_Os05g49760	AAGG	18.92
Arg	W085	Ind	LOC_Os05g49760	AAGG	17.01
Arg	W086	Ind	LOC_Os05g49760	AAGG	18.49
Arg	W087	Ind	LOC_Os05g49760	AAGG	18.75
Arg	W088	Jap	LOC_Os05g49760	GGAA	20.94
Arg	W089	Ind	LOC_Os05g49760	AAGG	18.46
Arg	W093	Ind	LOC_Os05g49760	AAGG	18.28
Arg	W101	Ind	LOC_Os05g49760	AAGG	17.75
Arg	W102	Jap	LOC_Os05g49760	AAGG	18.74
Arg	W109	Jap	LOC_Os05g49760	GGAA	17.9
Arg	W110	Jap	LOC_Os05g49760	GGAA	18.6
Arg	W111	Ind	LOC_Os05g49760	AAGG	16.49
Arg	W112	Ind	LOC_Os05g49760	AAGG	16.51
Arg	W113	Jap	LOC_Os05g49760	GGAA	21.87
Arg	W114	Ind	LOC_Os05g49760	GGGG	17.81
Arg	W116	Jap	LOC_Os05g49760	AAGG	19.84
Arg	W117	Jap	LOC_Os05g49760	GGAA	18.03
Arg	W118	Jap	LOC_Os05g49760	AAGG	19.86
Arg	W119	Jap	LOC_Os05g49760	GGAA	18.69
Arg	W120	Jap	LOC_Os05g49760	GGAA	19.41
Arg	W122	Jap	LOC_Os05g49760	GGAA	17.97
Arg	W123	Jap	LOC_Os05g49760	GGAA	18.6
Arg	W124	Ind	LOC_Os05g49760	AAGG	18.38
Arg	W126	Ind	LOC_Os05g49760	AAGG	18.4
Arg	W127	Jap	LOC_Os05g49760	GGAA	19.29
Arg	W130	Jap	LOC_Os05g49760	GGAA	18.51
Arg	W132	Ind	LOC_Os05g49760	AAGG	19.04
Arg	W133	Ind	LOC_Os05g49760	AAGG	18.57
Arg	W137	Ind	LOC_Os05g49760	GGGG	17.85
Arg	W138	Ind	LOC_Os05g49760	AAGG	17.43
Arg	W139	Jap	LOC_Os05g49760	GGAA	18.45
Arg	W143	Jap	LOC_Os05g49760	GGAA	18.48
Arg	W144	Ind	LOC_Os05g49760	AAGG	17.28
Arg	W145	Ind	LOC_Os05g49760	AAGG	16.43
Arg	W146	Ind	LOC_Os05g49760	AAGG	16.59
Arg	W147	Ind	LOC_Os05g49760	AAGG	16.69
Arg	W148	Ind	LOC_Os05g49760	AAGG	17.78
Arg	W149	Ind	LOC_Os05g49760	AAGG	18.5
Arg	W150	Ind	LOC_Os05g49760	AAGG	17.4
Arg	W151	Ind	LOC_Os05g49760	AAGG	17.98
Arg	W152	Ind	LOC_Os05g49760	GGGG	17.23
Arg	W153	Ind	LOC_Os05g49760	GGGG	17.12
Arg	W154	Ind	LOC_Os05g49760	AAGG	16.81
Arg	W155	Ind	LOC_Os05g49760	AAGG	17.23
Arg	W156	Ind	LOC_Os05g49760	AAGG	16.54
Arg	W157	Ind	LOC_Os05g49760	AAGG	16.28
Arg	W159	Ind	LOC_Os05g49760	AAGG	15.01
Arg	W160	Jap	LOC_Os05g49760	GGAA	17.07
Arg	W161	Ind	LOC_Os05g49760	AAGG	15.7
Arg	W162	Jap	LOC_Os05g49760	GGAA	17.55
Arg	W163	Ind	LOC_Os05g49760	AAGG	16.92
Arg	W164	Ind	LOC_Os05g49760	AAGG	17.16
Arg	W165	Ind	LOC_Os05g49760	AAGG	18.11
Arg	W166	Ind	LOC_Os05g49760	AAGG	16.72
Arg	W167	Ind	LOC_Os05g49760	AAGG	15.26
Arg	W168	Ind	LOC_Os05g49760	GGGG	16.42
Arg	W169	Ind	LOC_Os05g49760	GGGG	15.73
Arg	W170	Ind	LOC_Os05g49760	AAGG	17.05
Arg	W171	Ind	LOC_Os05g49760	GGGG	16.64
Arg	W172	Ind	LOC_Os05g49760	AAGG	17.21
Arg	W173	Jap	LOC_Os05g49760	AAGG	17.35
Arg	W174	Ind	LOC_Os05g49760	GGAA	17
Arg	W176	Ind	LOC_Os05g49760	AAGG	15.74
Arg	W177	Ind	LOC_Os05g49760	AAGG	15.47
Arg	W178	Ind	LOC_Os05g49760	GGGG	16.62
Arg	W179	Ind	LOC_Os05g49760	GGGG	15.22
Arg	W180	Ind	LOC_Os05g49760	GGGG	15.91
Arg	W181	Ind	LOC_Os05g49760	AAGG	16.81
Arg	W182	Ind	LOC_Os05g49760	AAGG	16.59
Arg	W183	Ind	LOC_Os05g49760	GGGG	16.5
Arg	W184	Ind	LOC_Os05g49760	GGGG	16.9
Arg	W185	Ind	LOC_Os05g49760	GGGG	16.73
Arg	W186	Ind	LOC_Os05g49760	AAGG	18.52
Arg	W187	Ind	LOC_Os05g49760	AAGG	19.32
Arg	W188	Ind	LOC_Os05g49760	AAGG	15.39
Arg	W189	Ind	LOC_Os05g49760	GGGG	16.36
Arg	W193	Jap	LOC_Os05g49760	GGAA	17.02
Arg	W194	Ind	LOC_Os05g49760	GGAA	17.59
Arg	W195	Ind	LOC_Os05g49760	GGGG	18.01
Arg	W197	Ind	LOC_Os05g49760	AAGG	17.02
Arg	W198	Ind	LOC_Os05g49760	AAGG	17.83
Arg	W199	Ind	LOC_Os05g49760	AAGG	17.65
Arg	W200	Ind	LOC_Os05g49760	GGGG	18.05
Arg	W201	Ind	LOC_Os05g49760	GGGG	19.23
Arg	W202	Ind	LOC_Os05g49760	GGGG	18.13
Arg	W203	Ind	LOC_Os05g49760	AAGG	17.8
Arg	W204	Ind	LOC_Os05g49760	AAGG	16.31
Arg	W205	Ind	LOC_Os05g49760	AAGG	16.82
Arg	W206	Ind	LOC_Os05g49760	AAGG	17.31
Arg	W207	Jap	LOC_Os05g49760	GGAA	18.12
Arg	W208	Jap	LOC_Os05g49760	GGAA	18.08
Arg	W209	Jap	LOC_Os05g49760	GGAA	17.47
Arg	W210	Ind	LOC_Os05g49760	AAGG	17.18
Arg	W211	Ind	LOC_Os05g49760	GGGG	16.14
Arg	W212	Ind	LOC_Os05g49760	AAGG	17.33
Arg	W213	Ind	LOC_Os05g49760	GGGG	16.45
Arg	W216	Ind	LOC_Os05g49760	GGAA	17.44
Arg	W217	Ind	LOC_Os05g49760	AAGG	18.26
Arg	W218	Ind	LOC_Os05g49760	GGGG	18.55
Arg	W221	Ind	LOC_Os05g49760	GGGG	18.48
Arg	W222	Ind	LOC_Os05g49760	GGGG	17.96
Arg	W223	Ind	LOC_Os05g49760	AAGG	17.56
Arg	W224	Ind	LOC_Os05g49760	GGGG	17.55
Arg	W225	Jap	LOC_Os05g49760	AAGG	19.34
Arg	W226	Jap	LOC_Os05g49760	GGAA	19.21
Arg	W227	Ind	LOC_Os05g49760	GGGG	16.84
Arg	W228	Ind	LOC_Os05g49760	GGGG	17.03
Arg	W229	Ind	LOC_Os05g49760	GGGG	17.47
Arg	W230	Ind	LOC_Os05g49760	GGGG	17.84
Arg	W231	Ind	LOC_Os05g49760	GGGG	17.38
Arg	W233	Ind	LOC_Os05g49760	AAGG	18.08
Arg	W234	Ind	LOC_Os05g49760	AAGG	17.69
Arg	W235	Ind	LOC_Os05g49760	AAGG	17.37
Arg	W236	Ind	LOC_Os05g49760	GGGG	18.36
Arg	W237	Ind	LOC_Os05g49760	GGGG	17.94
Arg	W238	Ind	LOC_Os05g49760	AAGG	18.23
Arg	W239	Ind	LOC_Os05g49760	AAGG	18.12
Arg	W240	Ind	LOC_Os05g49760	AAGG	18.6
Arg	W241	Ind	LOC_Os05g49760	AAGG	17.13
Arg	W242	Ind	LOC_Os05g49760	AAGG	17.38
Arg	W243	Ind	LOC_Os05g49760	GGGG	17.51
Arg	W245	Ind	LOC_Os05g49760	GGGG	17.36
Arg	W246	Ind	LOC_Os05g49760	AAGG	17.3
Arg	W247	Ind	LOC_Os05g49760	AAGG	16.75
Arg	W248	Ind	LOC_Os05g49760	AAGG	17.34
Arg	W249	Jap	LOC_Os05g49760	GGAA	18.31
Arg	W250	Jap	LOC_Os05g49760	GGAA	18.95
Arg	W251	Jap	LOC_Os05g49760	GGAA	19.08
Arg	W253	Jap	LOC_Os05g49760	GGAA	18.72
Arg	W254	Jap	LOC_Os05g49760	GGAA	18.87
Arg	W257	Jap	LOC_Os05g49760	GGAA	19.18
Arg	W259	Ind	LOC_Os05g49760	GGGG	17.71
Arg	W260	Jap	LOC_Os05g49760	GGAA	18.82
Arg	W262	Ind	LOC_Os05g49760	AAGG	17.42
Arg	W263	Ind	LOC_Os05g49760	AAGG	17.08
Arg	W264	Ind	LOC_Os05g49760	AAGG	17.65
Arg	W265	Ind	LOC_Os05g49760	AAGG	17.23
Arg	W266	Ind	LOC_Os05g49760	GGGG	16.41
Arg	W267	Ind	LOC_Os05g49760	AAGG	17.3
Arg	W268	Ind	LOC_Os05g49760	AAGG	17.85
Arg	W269	Ind	LOC_Os05g49760	GGGG	16.97
Arg	W270	Ind	LOC_Os05g49760	AAGG	17.18
Arg	W271	Ind	LOC_Os05g49760	AAGG	16.72
Arg	W272	Ind	LOC_Os05g49760	AAGG	16.91
Arg	W273	Jap	LOC_Os05g49760	GGAA	18.26
Arg	W274	Ind	LOC_Os05g49760	AAGG	17.31
Arg	W275	Jap	LOC_Os05g49760	GGAA	18.23
Arg	W276	Ind	LOC_Os05g49760	AAGG	17.59
Arg	W281	Jap	LOC_Os05g49760	GGAA	17.43
Arg	W282	Ind	LOC_Os05g49760	GGGG	17.35
Arg	W283	Jap	LOC_Os05g49760	GGAA	18.82
Arg	W284	Jap	LOC_Os05g49760	GGAA	17.47
Arg	W285	Jap	LOC_Os05g49760	GGAA	18.39
Arg	W288	Jap	LOC_Os05g49760	GGAA	18.67
Arg	W289	Ind	LOC_Os05g49760	AAGG	17.52
Arg	W290	Jap	LOC_Os05g49760	GGAA	18.14
Arg	W291	Ind	LOC_Os05g49760	GGGG	16.87
Arg	W293	Ind	LOC_Os05g49760	AAGG	17.69
Arg	W295	Ind	LOC_Os05g49760	GGGG	16.55
Arg	W298	Ind	LOC_Os05g49760	GGGG	16.55
Arg	W299	Ind	LOC_Os05g49760	AAGG	18.06
Arg	W300	Jap	LOC_Os05g49760	AAGG	17.95
Arg	W301	Ind	LOC_Os05g49760	GGGG	16.02
Arg	W302	Jap	LOC_Os05g49760	GGAA	17
Arg	W303	Jap	LOC_Os05g49760	GGAA	17.31
Arg	W305	Jap	LOC_Os05g49760	GGAA	17.31
Arg	W307	Ind	LOC_Os05g49760	GGGG	17.18
Arg	W308	Ind	LOC_Os05g49760	AAGG	16.84
Arg	W309	Ind	LOC_Os05g49760	AAGG	16.87
Arg	W310	Ind	LOC_Os05g49760	GGGG	17.25
Arg	W311	Ind	LOC_Os05g49760	AAGG	16.68
Arg	W312	Ind	LOC_Os05g49760	GGGG	16.1
Arg	W313	Ind	LOC_Os05g49760	GGGG	16.28
Arg	W314	Ind	LOC_Os05g49760	GGGG	17.13
Arg	W315	Ind	LOC_Os05g49760	GGGG	16.73
Arg	W316	Ind	LOC_Os05g49760	AAGG	17.85
Arg	W317	Ind	LOC_Os05g49760	GGGG	16.67
Arg	W318	Ind	LOC_Os05g49760	AAGG	16.68
Arg	W319	Jap	LOC_Os05g49760	GGAA	17.69
Arg	W320	Ind	LOC_Os05g49760	AAGG	16.5
Arg	W321	Ind	LOC_Os05g49760	GGGG	17.1
Arg	W322	Ind	LOC_Os05g49760	AAGG	17.14
Arg	W323	Jap	LOC_Os05g49760	GGGG	18.59
Arg	W324	Jap	LOC_Os05g49760	GGAA	18.75
Arg	W325	Jap	LOC_Os05g49760	GGAA	18.49
Arg	W326	Jap	LOC_Os05g49760	GGAA	17.47
Arg	W327	Jap	LOC_Os05g49760	GGAA	17.25
Arg	W329	Jap	LOC_Os05g49760	AAGG	18.62
Trp	C001	Ind	LOC_Os11g06900	CC	22.53
Trp	C003	Jap	LOC_Os11g06900	TT	22.46
Trp	C004	Jap	LOC_Os11g06900	TT	21.86
Trp	C005	Jap	LOC_Os11g06900	TT	22.04
Trp	C006	Ind	LOC_Os11g06900	TT	21.98
Trp	C007	Ind	LOC_Os11g06900	TT	22.58
Trp	C008	Ind	LOC_Os11g06900	CC	23.58
Trp	C009	Ind	LOC_Os11g06900	TT	23.31
Trp	C010	Jap	LOC_Os11g06900	TT	22.96
Trp	C011	Ind	LOC_Os11g06900	CC	21.98
Trp	C012	Jap	LOC_Os11g06900	TT	22.66
Trp	C014	Jap	LOC_Os11g06900	TT	22.96
Trp	C016	Jap	LOC_Os11g06900	TT	21.64
Trp	C017	Jap	LOC_Os11g06900	TT	22.15
Trp	C018	Jap	LOC_Os11g06900	TT	21.73
Trp	C019	Ind	LOC_Os11g06900	CC	22.1
Trp	C020	Ind	LOC_Os11g06900	CC	21.54
Trp	C021	Ind	LOC_Os11g06900	CC	22.36
Trp	C022	Ind	LOC_Os11g06900	CC	21.74
Trp	C023	Jap	LOC_Os11g06900	TT	21.56
Trp	C024	Ind	LOC_Os11g06900	CC	21.77
Trp	C025	Ind	LOC_Os11g06900	TT	22.74
Trp	C026	Jap	LOC_Os11g06900	TT	22.55
Trp	C027	Ind	LOC_Os11g06900	CC	23
Trp	C028	Jap	LOC_Os11g06900	TT	22.28
Trp	C029	Jap	LOC_Os11g06900	TT	22.92
Trp	C030	Ind	LOC_Os11g06900	CC	21.5
Trp	C031	Ind	LOC_Os11g06900	CC	22.48
Trp	C032	Jap	LOC_Os11g06900	TT	21.55
Trp	C033	Ind	LOC_Os11g06900	CC	22.99
Trp	C034	Jap	LOC_Os11g06900	TT	21.6
Trp	C035	Jap	LOC_Os11g06900	TT	21.54
Trp	C036	Ind	LOC_Os11g06900	CC	22.47
Trp	C037	Ind	LOC_Os11g06900	CC	22.35
Trp	C038	Ind	LOC_Os11g06900	CC	22.1
Trp	C039	Ind	LOC_Os11g06900	CC	22.84
Trp	C040	Ind	LOC_Os11g06900	CC	22.28
Trp	C041	Ind	LOC_Os11g06900	CC	22.38
Trp	C042	Ind	LOC_Os11g06900	CC	22.24
Trp	C043	Ind	LOC_Os11g06900	CC	21.93
Trp	C044	Ind	LOC_Os11g06900	CC	22.95
Trp	C045	Ind	LOC_Os11g06900	CC	22.09
Trp	C046	Ind	LOC_Os11g06900	CC	22.67
Trp	C047	Ind	LOC_Os11g06900	CC	21.76
Trp	C048	Jap	LOC_Os11g06900	TT	22.7
Trp	C049	Ind	LOC_Os11g06900	CC	22.12
Trp	C050	Ind	LOC_Os11g06900	CC	21.93
Trp	C052	Jap	LOC_Os11g06900	TT	22.9
Trp	C053	Ind	LOC_Os11g06900	TT	22.27
Trp	C054	Jap	LOC_Os11g06900	TT	22.7
Trp	C055	Ind	LOC_Os11g06900	TT	24.45
Trp	C056	Jap	LOC_Os11g06900	TT	22.47
Trp	C057	Jap	LOC_Os11g06900	TT	22.87
Trp	C058	Ind	LOC_Os11g06900	CC	22.21
Trp	C059	Ind	LOC_Os11g06900	CC	22.59
Trp	C060	Ind	LOC_Os11g06900	CC	22.75
Trp	C061	Ind	LOC_Os11g06900	CC	23.44
Trp	C062	Ind	LOC_Os11g06900	CC	23.21
Trp	C063	Jap	LOC_Os11g06900	TT	23.44
Trp	C064	Jap	LOC_Os11g06900	TT	23.3
Trp	C065	Ind	LOC_Os11g06900	CC	22.71
Trp	C066	Ind	LOC_Os11g06900	CC	22.28
Trp	C067	Jap	LOC_Os11g06900	TT	22.43
Trp	C068	Ind	LOC_Os11g06900	CC	23.76
Trp	C069	Ind	LOC_Os11g06900	CC	23.19
Trp	C070	Jap	LOC_Os11g06900	TT	23.25
Trp	C071	Jap	LOC_Os11g06900	TT	21.29
Trp	C072	Ind	LOC_Os11g06900	CC	22.04
Trp	C073	Ind	LOC_Os11g06900	CC	20.95
Trp	C074	Jap	LOC_Os11g06900	TT	22.78
Trp	C075	Jap	LOC_Os11g06900	TT	22.56
Trp	C076	Ind	LOC_Os11g06900	CC	21.9
Trp	C077	Ind	LOC_Os11g06900	CC	22.53
Trp	C078	Ind	LOC_Os11g06900	CC	22.9
Trp	C079	Jap	LOC_Os11g06900	TT	22.44
Trp	C080	Ind	LOC_Os11g06900	CC	21.34
Trp	C081	Ind	LOC_Os11g06900	CC	22.17
Trp	C082	Jap	LOC_Os11g06900	TT	22.1
Trp	C083	Jap	LOC_Os11g06900	TT	22.15
Trp	C085	Jap	LOC_Os11g06900	TT	22.86
Trp	C087	Jap	LOC_Os11g06900	TT	22.9
Trp	C088	Ind	LOC_Os11g06900	CC	23.9
Trp	C089	Jap	LOC_Os11g06900	TT	21.28
Trp	C090	Ind	LOC_Os11g06900	CC	22.47
Trp	C091	Ind	LOC_Os11g06900	CC	23.4
Trp	C092	Ind	LOC_Os11g06900	CC	23.91
Trp	C093	Jap	LOC_Os11g06900	TT	24.38
Trp	C094	Ind	LOC_Os11g06900	CC	22.41
Trp	C095	Ind	LOC_Os11g06900	TT	22.76
Trp	C096	Ind	LOC_Os11g06900	CC	22.05
Trp	C097	Ind	LOC_Os11g06900	CC	22.14
Trp	C098	Ind	LOC_Os11g06900	CC	22.41
Trp	C099	Ind	LOC_Os11g06900	TT	23.31
Trp	C100	Ind	LOC_Os11g06900	CC	22.98
Trp	C101	Jap	LOC_Os11g06900	TT	23.25
Trp	C102	Ind	LOC_Os11g06900	TT	21.84
Trp	C103	Jap	LOC_Os11g06900	TT	23.31
Trp	C104	Ind	LOC_Os11g06900	CC	22.87
Trp	C105	Ind	LOC_Os11g06900	CC	23.03
Trp	C106	Jap	LOC_Os11g06900	TT	22.42
Trp	C107	Ind	LOC_Os11g06900	CC	23.34
Trp	C108	Ind	LOC_Os11g06900	CC	21.25
Trp	C109	Ind	LOC_Os11g06900	CC	22.16
Trp	C110	Ind	LOC_Os11g06900	TT	22.75
Trp	C111	Jap	LOC_Os11g06900	TT	21.64
Trp	C112	Ind	LOC_Os11g06900	CC	22.1
Trp	C113	Ind	LOC_Os11g06900	CC	21.98
Trp	C114	Ind	LOC_Os11g06900	CC	22.24
Trp	C115	Ind	LOC_Os11g06900	CC	22.87
Trp	C116	Jap	LOC_Os11g06900	TT	23.43
Trp	C117	Ind	LOC_Os11g06900	CC	22.35
Trp	C118	Ind	LOC_Os11g06900	CC	21.97
Trp	C119	Jap	LOC_Os11g06900	TT	22.61
Trp	C120	Jap	LOC_Os11g06900	TT	22.66
Trp	C121	Ind	LOC_Os11g06900	CC	22.02
Trp	C122	Ind	LOC_Os11g06900	CC	23.32
Trp	C123	Jap	LOC_Os11g06900	TT	22.22
Trp	C124	Ind	LOC_Os11g06900	CC	21.85
Trp	C125	Ind	LOC_Os11g06900	CC	21.38
Trp	C127	Ind	LOC_Os11g06900	CC	21.16
Trp	C128	Ind	LOC_Os11g06900	CC	21.37
Trp	C129	Ind	LOC_Os11g06900	CC	23.36
Trp	C130	Jap	LOC_Os11g06900	TT	21.81
Trp	C131	Ind	LOC_Os11g06900	CC	21.91
Trp	C132	Ind	LOC_Os11g06900	CC	21.61
Trp	C133	Jap	LOC_Os11g06900	TT	22.02
Trp	C134	Jap	LOC_Os11g06900	TT	22.26
Trp	C135	Ind	LOC_Os11g06900	CC	21.32
Trp	C136	Ind	LOC_Os11g06900	CC	21.15
Trp	C137	Jap	LOC_Os11g06900	TT	21.43
Trp	C138	Jap	LOC_Os11g06900	TT	23.15
Trp	C139	Ind	LOC_Os11g06900	TT	22.45
Trp	C140	Ind	LOC_Os11g06900	TT	22.59
Trp	C141	Ind	LOC_Os11g06900	CC	22.63
Trp	C142	Ind	LOC_Os11g06900	CC	23.11
Trp	C143	Ind	LOC_Os11g06900	TT	22.73
Trp	C144	Jap	LOC_Os11g06900	TT	23.43
Trp	C145	Ind	LOC_Os11g06900	CC	22.53
Trp	C146	Jap	LOC_Os11g06900	TT	22.5
Trp	C147	Ind	LOC_Os11g06900	CC	22.58
Trp	C148	Ind	LOC_Os11g06900	CC	22.58
Trp	C149	Jap	LOC_Os11g06900	TT	21.9
Trp	C150	Jap	LOC_Os11g06900	TT	23.03
Trp	C151	Ind	LOC_Os11g06900	CC	22.78
Trp	C152	Jap	LOC_Os11g06900	TT	22.55
Trp	C153	Jap	LOC_Os11g06900	TT	22.16
Trp	C154	Jap	LOC_Os11g06900	TT	21.47
Trp	C155	Ind	LOC_Os11g06900	CC	22.41
Trp	C156	Ind	LOC_Os11g06900	CC	22.18
Trp	C157	Ind	LOC_Os11g06900	CC	22.49
Trp	C158	Ind	LOC_Os11g06900	CC	21.56
Trp	C159	Ind	LOC_Os11g06900	CC	22.47
Trp	C160	Ind	LOC_Os11g06900	CC	22.14
Trp	C161	Ind	LOC_Os11g06900	CC	22.12
Trp	C162	Ind	LOC_Os11g06900	CC	22.39
Trp	C163	Ind	LOC_Os11g06900	CC	22.24
Trp	C164	Ind	LOC_Os11g06900	CC	22
Trp	C165	Ind	LOC_Os11g06900	CC	22.35
Trp	C166	Ind	LOC_Os11g06900	CC	22.28
Trp	C167	Ind	LOC_Os11g06900	CC	21.37
Trp	C168	Ind	LOC_Os11g06900	CC	21.06
Trp	C169	Ind	LOC_Os11g06900	CC	22.21
Trp	C170	Ind	LOC_Os11g06900	CC	21.82
Trp	C171	Jap	LOC_Os11g06900	TT	22.48
Trp	C172	Jap	LOC_Os11g06900	TT	22.26
Trp	C173	Ind	LOC_Os11g06900	CC	22.9
Trp	C174	Ind	LOC_Os11g06900	CC	21.67
Trp	C175	Ind	LOC_Os11g06900	CC	22.26
Trp	C176	Ind	LOC_Os11g06900	CC	22.11
Trp	C177	Jap	LOC_Os11g06900	TT	21.69
Trp	C178	Ind	LOC_Os11g06900	CC	22.4
Trp	C179	Jap	LOC_Os11g06900	TT	22.18
Trp	C180	Ind	LOC_Os11g06900	CC	21.85
Trp	C181	Jap	LOC_Os11g06900	TT	22.6
Trp	C182	Ind	LOC_Os11g06900	CC	22.64
Trp	C183	Ind	LOC_Os11g06900	CC	22.9
Trp	C184	Ind	LOC_Os11g06900	CC	22.79
Trp	C185	Jap	LOC_Os11g06900	TT	23.04
Trp	C186	Jap	LOC_Os11g06900	TT	23.17
Trp	C187	Jap	LOC_Os11g06900	TT	22.52
Trp	C188	Jap	LOC_Os11g06900	TT	21.94
Trp	C189	Jap	LOC_Os11g06900	TT	22.13
Trp	C190	Ind	LOC_Os11g06900	CC	22.06
Trp	C191	Ind	LOC_Os11g06900	CC	22.12
Trp	C192	Ind	LOC_Os11g06900	CC	22.38
Trp	C193	Ind	LOC_Os11g06900	CC	23.34
Trp	C194	Ind	LOC_Os11g06900	CC	22.42
Trp	C195	Jap	LOC_Os11g06900	TT	22.42
Trp	C196	Jap	LOC_Os11g06900	TT	23.61
Trp	C197	Ind	LOC_Os11g06900	CC	23.13
Trp	C198	Ind	LOC_Os11g06900	CC	23.07
Trp	C199	Ind	LOC_Os11g06900	TT	23.81
Trp	C200	Ind	LOC_Os11g06900	CC	23.32
Trp	C201	Ind	LOC_Os11g06900	CC	22.43
Trp	C202	Ind	LOC_Os11g06900	CC	22.46
Trp	C203	Ind	LOC_Os11g06900	CC	22.06
Trp	W001	Ind	LOC_Os11g06900	CC	24.47
Trp	W002	Jap	LOC_Os11g06900	TT	23.21
Trp	W003	Jap	LOC_Os11g06900	TT	22.92
Trp	W004	Jap	LOC_Os11g06900	TT	22.97
Trp	W005	Jap	LOC_Os11g06900	TT	22.98
Trp	W006	Jap	LOC_Os11g06900	CC	23.62
Trp	W007	Jap	LOC_Os11g06900	TT	22.77
Trp	W008	Jap	LOC_Os11g06900	TT	22.44
Trp	W009	Ind	LOC_Os11g06900	CC	23.14
Trp	W010	Jap	LOC_Os11g06900	TT	22.62
[truncated: 242 more rows]

## Sheet: Supplementary Table 5
Supplementary Table 5 | QTN-by-environment interactions (QEIs) detected from five FAA content datasets.
Trait	QEI	Chromosome	Position (bp)	SNP	LOD (QEI)	add*env1	add*env2	R2(%)
Val	QEI_01_03142509	1	3142509	G/A	6.098	0.058	-0.058	0.391
Val	QEI_01_07646220	1	7646220	A/G	22.653	-0.115	0.115	1.505
Val	QEI_02_12835432	2	12835432	T/C	5.172	-0.055	0.055	0.34
Val	QEI_03_08713916	3	8713916	A/G	7.114	-0.063	0.063	0.455
Val	QEI_03_29912150	3	29912150	T/C	5.722	-0.056	0.056	0.365
Val	QEI_04_00943094	4	943094	T/C	6.384	0.06	-0.06	0.409
Val	QEI_05_03167614	5	3167614	T/C	13.648	0.088	-0.088	0.886
Val	QEI_05_19754561	5	19754561	C/A	6.449	0.06	-0.06	0.414
Val	QEI_06_05320615	6	5320615	T/C	5.739	0.058	-0.058	0.381
Val	QEI_06_10883433	6	10883433	T/C	28.951	-0.131	0.131	1.956
Val	QEI_06_12183485	6	12183485	T/G	15.174	0.095	-0.095	1.028
Val	QEI_06_22994271	6	22994271	G/T	5.088	0.054	-0.054	0.333
Val	QEI_07_10432101	7	10432101	T/C	9.145	0.074	-0.074	0.632
Val	QEI_07_18015469	7	18015469	T/C	6.883	0.064	-0.064	0.468
Val	QEI_09_04669772	9	4669772	G/C	10.147	0.076	-0.076	0.66
Val	QEI_09_09052420	9	9052420	A/G	7.432	0.065	-0.065	0.487
Val	QEI_10_11567790	10	11567790	A/G	5.205	-0.054	0.054	0.331
Val	QEI_11_06000883	11	6000883	G/A	7.617	-0.065	0.065	0.489
Val	QEI_11_08096193	11	8096193	C/A	23.702	0.118	-0.118	1.586
Val	QEI_11_26137605	11	26137605	G/A	35.284	0.146	-0.146	2.424
Val	QEI_12_08037829	12	8037829	C/G	7.712	0.068	-0.068	0.531
Val	QEI_12_14228913	12	14228913	T/G	26.542	0.125	-0.125	1.786
Val	QEI_12_17047868	12	17047868	A/C	12.462	0.084	-0.084	0.812
Leu	QEI_01_34820524	1	34820524	C/T	7.828	0.092	-0.092	0.91
Leu	QEI_02_08224395	2	8224395	T/C	7.844	0.089	-0.089	0.863
Leu	QEI_04_03199708	4	3199708	G/A	5.069	-0.073	0.073	0.574
Leu	QEI_04_10816239	4	10816239	T/C	6.556	0.082	-0.082	0.727
Leu	QEI_04_12566119	4	12566119	C/T	7.698	-0.089	0.089	0.854
Leu	QEI_05_10460733	5	10460733	T/C	13.01	0.116	-0.116	1.457
Leu	QEI_06_06934620	6	6934620	C/G	14.059	0.124	-0.124	1.65
Leu	QEI_07_10492787	7	10492787	C/T	11.29	-0.109	0.109	1.282
Leu	QEI_07_11019378	7	11019378	T/G	21.311	-0.149	0.149	2.406
Leu	QEI_07_14098546	7	14098546	C/T	11.271	-0.108	0.108	1.257
Leu	QEI_07_17050959	7	17050959	C/T	10.181	-0.103	0.103	1.142
Leu	QEI_08_14219820	8	14219820	T/C	9.144	0.097	-0.097	1.019
Leu	QEI_08_26013894	8	26013894	C/T	11.435	0.108	-0.108	1.258
Leu	QEI_09_03363172	9	3363172	G/C	5.45	-0.074	0.074	0.593
Leu	QEI_09_03978551	9	3978551	A/G	11.416	-0.111	0.111	1.324
Leu	QEI_12_16723846	12	16723846	G/A	13.917	-0.124	0.124	1.668
Ile	QEI_01_07646220	1	7646220	A/G	8.968	-0.103	0.103	0.834
Ile	QEI_01_33085249	1	33085249	T/C	8.322	-0.101	0.101	0.799
Ile	QEI_01_40769605	1	40769605	C/T	29.921	-0.194	0.194	2.939
Ile	QEI_02_08224395	2	8224395	T/C	12.098	0.121	-0.121	1.145
Ile	QEI_03_24095398	3	24095398	A/T	11.794	0.119	-0.119	1.11
Ile	QEI_04_01504960	4	1504960	C/T	8.158	-0.099	0.099	0.759
Ile	QEI_04_07625239	4	7625239	C/T	6.579	0.091	-0.091	0.643
Ile	QEI_04_08336768	4	8336768	C/T	9.791	-0.109	0.109	0.927
Ile	QEI_05_00550335	5	550335	G/A	8.092	-0.098	0.098	0.751
Ile	QEI_05_03173712	5	3173712	A/G	10.476	0.112	-0.112	0.978
Ile	QEI_05_19978218	5	19978218	A/G	6.309	-0.09	0.09	0.631
Ile	QEI_07_25073613	7	25073613	A/G	7.457	-0.094	0.094	0.695
Ile	QEI_10_03300105	10	3300105	T/C	5.931	0.084	-0.084	0.55
Ile	QEI_10_16421276	10	16421276	T/C	12.388	-0.122	0.122	1.165
Ile	QEI_11_06018861	11	6018861	G/A	4.83	-0.077	0.077	0.464
Ile	QEI_12_17836454	12	17836454	T/A	14.651	-0.133	0.133	1.386
Arg	QEI_01_42530945	1	42530945	T/C	6.164	0.076	-0.076	0.345
Arg	QEI_02_08850656	2	8850656	G/A	11.577	-0.105	0.105	0.661
Arg	QEI_02_15664980	2	15664980	G/A	11.506	-0.105	0.105	0.651
Arg	QEI_03_16101368	3	16101368	A/C	13.466	-0.113	0.113	0.761
Arg	QEI_05_02142041	5	2142041	A/G	8.962	0.092	-0.092	0.501
Arg	QEI_05_19824345	5	19824345	A/T	7.561	0.087	-0.087	0.454
Arg	QEI_06_14738020	6	14738020	T/C	6.295	0.079	-0.079	0.372
Arg	QEI_06_22787971	6	22787971	T/C	9.254	0.093	-0.093	0.517
Arg	QEI_07_11199427	7	11199427	T/A	15.216	-0.121	0.121	0.877
Arg	QEI_08_05507941	8	5507941	G/T	17.096	0.129	-0.129	0.986
Arg	QEI_10_16363432	10	16363432	T/C	21.146	0.143	-0.143	1.222
Arg	QEI_11_04754773	11	4754773	T/C	10.844	0.101	-0.101	0.609
Arg	QEI_11_05916216	11	5916216	A/G	10.266	0.098	-0.098	0.575
Arg	QEI_11_17252333	11	17252333	G/A	8.29	0.088	-0.088	0.465
Arg	QEI_12_02500310	12	2500310	G/A	18.901	-0.136	0.136	1.098
Arg	QEI_12_05518299	12	5518299	T/C	8.857	-0.091	0.091	0.497
Arg	QEI_12_09153839	12	9153839	G/C	18.277	-0.133	0.133	1.062
Arg	QEI_12_15627474	12	15627474	C/T	10.93	-0.104	0.104	0.65
Trp	QEI_01_00617184	1	617184	T/C	5.617	-0.064	0.064	0.4
Trp	QEI_01_01473469	1	1473469	C/T	6.04	-0.066	0.066	0.432
Trp	QEI_01_21568134	1	21568134	A/T	9.072	-0.083	0.083	0.672
Trp	QEI_01_33085249	1	33085249	T/C	6.204	-0.068	0.068	0.455
Trp	QEI_02_16479271	2	16479271	A/G	11.513	0.092	-0.092	0.828
Trp	QEI_04_10816239	4	10816239	T/C	11.102	0.091	-0.091	0.814
Trp	QEI_05_00017376	5	17376	T/C	9.015	0.081	-0.081	0.653
Trp	QEI_05_19407003	5	19407003	A/G	6.744	-0.07	0.07	0.48
Trp	QEI_06_22625655	6	22625655	T/A	10.531	0.089	-0.089	0.783
Trp	QEI_06_29461479	6	29461479	T/A	6.347	-0.071	0.071	0.492
Trp	QEI_07_11019378	7	11019378	T/G	34.53	-0.163	0.163	2.637
Trp	QEI_07_25249716	7	25249716	G/A	6.342	-0.068	0.068	0.45
Trp	QEI_08_16598403	8	16598403	A/G	6.615	0.069	-0.069	0.472
Trp	QEI_09_02140358	9	2140358	A/G	11.128	0.09	-0.09	0.807
Trp	QEI_10_00983365	10	983365	C/T	12.188	-0.097	0.097	0.932
Trp	QEI_10_16417474	10	16417474	T/G	6.518	-0.068	0.068	0.463
Trp	QEI_10_16983215	10	16983215	T/C	12.616	-0.096	0.096	0.91
Trp	QEI_11_13081145	11	13081145	T/C	17.501	0.114	-0.114	1.293
Trp	QEI_12_08223057	12	8223057	G/A	6.733	0.07	-0.07	0.479
Trp	QEI_12_15671071	12	15671071	A/C	4.633	0.061	-0.061	0.363
Trp	QEI_12_19953282	12	19953282	T/C	16.417	-0.11	0.11	1.204
Trp	QEI_12_23034829	12	23034829	C/A	5.382	0.062	-0.062	0.381

## Sheet: Supplementary Table 6
Supplementary Table 6 | Candidate genes of QEIs.
Trait	QEI NO.	QEI	Chromosome	Distance (kb)	MSU_locus	Functional annotation
Val	1	QEI_01_03142509	1	-117	LOC_Os01g06370	hypothetical protein
Val	1	QEI_01_03142509	1	-115	LOC_Os01g06380	hypothetical protein
Val	1	QEI_01_03142509	1	-112	LOC_Os01g06390	hypothetical protein
Val	1	QEI_01_03142509	1	-110	LOC_Os01g06400	expressed protein
Val	1	QEI_01_03142509	1	-108	LOC_Os01g06410	hypothetical protein
Val	1	QEI_01_03142509	1	-107	LOC_Os01g06420	hypothetical protein
Val	1	QEI_01_03142509	1	-106	LOC_Os01g06430	expressed protein
Val	1	QEI_01_03142509	1	-104	LOC_Os01g06440	expressed protein
Val	1	QEI_01_03142509	1	-102	LOC_Os01g06450	glycosyltransferase family 43 protein, putative, expressed
Val	1	QEI_01_03142509	1	-99	LOC_Os01g06454	heat shock protein DnaJ, putative, expressed
Val	1	QEI_01_03142509	1	-96	LOC_Os01g06460	uncharacterized Cys-rich domain containing protein, putative, expressed
Val	1	QEI_01_03142509	1	-91	LOC_Os01g06470	expressed protein
Val	1	QEI_01_03142509	1	-86	LOC_Os01g06490	OsSCP1 - Putative Serine Carboxypeptidase homologue, expressed
Val	1	QEI_01_03142509	1	-83	LOC_Os01g06500	PHLOEM 2-LIKE A5, putative, expressed
Val	1	QEI_01_03142509	1	-77	LOC_Os01g06510	arginyl-tRNA synthetase, putative, expressed
Val	1	QEI_01_03142509	1	-72	LOC_Os01g06520	verticillium wilt disease resistance protein, putative, expressed
Val	1	QEI_01_03142509	1	-61	LOC_Os01g06530	retrotransposon protein, putative, unclassified
Val	1	QEI_01_03142509	1	-58	LOC_Os01g06540	PHD finger protein, putative
Val	1	QEI_01_03142509	1	-52	LOC_Os01g06550	NF-X1-type zinc finger protein, putative, expressed
Val	1	QEI_01_03142509	1	-50	LOC_Os01g06560	transcription factor HBP-1b, putative, expressed
Val	1	QEI_01_03142509	1	-47	LOC_Os01g06570	hypothetical protein
Val	1	QEI_01_03142509	1	-44	LOC_Os01g06580	fasciclin domain containing protein, expressed
Val	1	QEI_01_03142509	1	-38	LOC_Os01g06590	zinc finger, C3HC4 type domain containing protein, expressed
Val	1	QEI_01_03142509	1	-29	LOC_Os01g06600	glutaryl-CoA dehydrogenase, mitochondrial precursor, putative, expressed
Val	1	QEI_01_03142509	1	-26	LOC_Os01g06610	retrotransposon protein, putative, Ty3-gypsy subclass
Val	1	QEI_01_03142509	1	-19	LOC_Os01g06620	expressed protein
Val	1	QEI_01_03142509	1	-18	LOC_Os01g06630	small hydrophilic plant seed protein, putative, expressed
Val	1	QEI_01_03142509	1	-12	LOC_Os01g06640	basic helix-loop-helix, putative, expressed
Val	1	QEI_01_03142509	1	-8	LOC_Os01g06650	retrotransposon protein, putative, unclassified
Val	1	QEI_01_03142509	1	-3	LOC_Os01g06660	thiamine pyrophosphate enzyme, C-terminal TPP binding domain containing protein, expressed
Val	1	QEI_01_03142509	1	0	LOC_Os01g06670	hcr2-5D, putative, expressed
Val	1	QEI_01_03142509	1	3	LOC_Os01g06680	retrotransposon protein, putative, unclassified, expressed
Val	1	QEI_01_03142509	1	13	LOC_Os01g06690	retrotransposon protein, putative, unclassified
Val	1	QEI_01_03142509	1	17	LOC_Os01g06700	retrotransposon protein, putative, unclassified
Val	1	QEI_01_03142509	1	24	LOC_Os01g06710	retrotransposon protein, putative, unclassified
Val	1	QEI_01_03142509	1	33	LOC_Os01g06720	disease resistance protein SlVe2 precursor, putative
Val	1	QEI_01_03142509	1	38	LOC_Os01g06730	verticillium wilt disease resistance protein, putative, expressed
Val	1	QEI_01_03142509	1	45	LOC_Os01g06740	ribosome inactivating protein, putative, expressed
Val	1	QEI_01_03142509	1	53	LOC_Os01g06750	verticillium wilt disease resistance protein precursor, putative
Val	1	QEI_01_03142509	1	57	LOC_Os01g06760	verticillium wilt disease resistance protein Ve2, putative
Val	1	QEI_01_03142509	1	65	LOC_Os01g06770	retrotransposon protein, putative, Ty3-gypsy subclass
Val	1	QEI_01_03142509	1	74	LOC_Os01g06780	retrotransposon protein, putative, Ty3-gypsy subclass
Val	1	QEI_01_03142509	1	78	LOC_Os01g06790	disease resistance protein, putative, expressed
Val	1	QEI_01_03142509	1	85	LOC_Os01g06800	hypothetical protein
Val	1	QEI_01_03142509	1	87	LOC_Os01g06810	retrotransposon protein, putative, Ty1-copia subclass
Val	1	QEI_01_03142509	1	92	LOC_Os01g06820	hcr2-0B, putative
Val	1	QEI_01_03142509	1	97	LOC_Os01g06836	disease resistance protein SlVe2 precursor, putative
Val	1	QEI_01_03142509	1	103	LOC_Os01g06852	transposon protein, putative, unclassified
Val	1	QEI_01_03142509	1	107	LOC_Os01g06870	resistance protein SlVe1 precursor, putative, expressed
Val	1	QEI_01_03142509	1	113	LOC_Os01g06876	Cf-2, putative, expressed
Val	1	QEI_01_03142509	1	114	LOC_Os01g06882	expressed protein
Val	1	QEI_01_03142509	1	115	LOC_Os01g06890	leucine-rich repeat family protein, putative
Val	2	QEI_01_07646220	1	-117	LOC_Os01g13500	hypothetical protein
Val	2	QEI_01_07646220	1	-102	LOC_Os01g13510	hypothetical protein
Val	2	QEI_01_07646220	1	-95	LOC_Os01g13520	auxin response factor 1, putative, expressed
Val	2	QEI_01_07646220	1	-86	LOC_Os01g13530	ABIL2, putative, expressed
Val	2	QEI_01_07646220	1	-70	LOC_Os01g13540	NIN, putative, expressed
Val	2	QEI_01_07646220	1	-64	LOC_Os01g13550	beta-amylase, putative, expressed
Val	2	QEI_01_07646220	1	-57	LOC_Os01g13560	membrane associated DUF588 domain containing protein, putative, expressed
Val	2	QEI_01_07646220	1	-54	LOC_Os01g13570	phosphoglycerate mutase, putative, expressed
Val	2	QEI_01_07646220	1	-43	LOC_Os01g13590	isoflavone reductase homolog IRL, putative
Val	2	QEI_01_07646220	1	-40	LOC_Os01g13600	nmrA-like family domain containing protein
Val	2	QEI_01_07646220	1	-22	LOC_Os01g13610	isoflavone reductase homolog IRL, putative, expressed
Val	2	QEI_01_07646220	1	-6	LOC_Os01g13620	retrotransposon protein, putative, unclassified
Val	2	QEI_01_07646220	1	-4	LOC_Os01g13630	retrotransposon protein, putative, unclassified
Val	2	QEI_01_07646220	1	1	LOC_Os01g13640	retrotransposon, putative, centromere-specific
Val	2	QEI_01_07646220	1	3	LOC_Os01g13650	retrotransposon protein, putative, unclassified
Val	2	QEI_01_07646220	1	5	LOC_Os01g13660	expressed protein
Val	2	QEI_01_07646220	1	10	LOC_Os01g13670	conserved hypothetical protein
Val	2	QEI_01_07646220	1	13	LOC_Os01g13680	hypothetical protein
Val	2	QEI_01_07646220	1	17	LOC_Os01g13690	ligA, putative, expressed
Val	2	QEI_01_07646220	1	22	LOC_Os01g13700	DNA-binding protein-related, putative, expressed
Val	2	QEI_01_07646220	1	25	LOC_Os01g13710	transposon protein, putative, unclassified, expressed
Val	2	QEI_01_07646220	1	29	LOC_Os01g13720	expressed protein
Val	2	QEI_01_07646220	1	31	LOC_Os01g13730	WD domain, G-beta repeat domain containing protein, expressed
Val	2	QEI_01_07646220	1	39	LOC_Os01g13740	myb-like DNA-binding domain containing protein, expressed
Val	2	QEI_01_07646220	1	65	LOC_Os01g13760	dnaJ domain containing protein, expressed
Val	2	QEI_01_07646220	1	70	LOC_Os01g13770	DUF250 domain containing protein, putative, expressed
Val	2	QEI_01_07646220	1	77	LOC_Os01g13780	expressed protein
Val	2	QEI_01_07646220	1	91	LOC_Os01g13800	receptor-like protein kinase 5 precursor, putative, expressed
Val	2	QEI_01_07646220	1	97	LOC_Os01g13810	expressed protein
Val	2	QEI_01_07646220	1	102	LOC_Os01g13820	retrotransposon protein, putative, unclassified
Val	2	QEI_01_07646220	1	108	LOC_Os01g13830	expressed protein
Val	2	QEI_01_07646220	1	117	LOC_Os01g13840	PE-PGRS family protein, putative
Val	2	QEI_01_07646220	1	119	LOC_Os01g13850	hypothetical protein
Val	3	QEI_02_12835432	2	-117	LOC_Os02g21420	hypothetical protein
Val	3	QEI_02_12835432	2	-106	LOC_Os02g21430	AML1, putative, expressed
Val	3	QEI_02_12835432	2	-105	LOC_Os02g21440	hypothetical protein
Val	3	QEI_02_12835432	2	-104	LOC_Os02g21450	hypothetical protein
Val	3	QEI_02_12835432	2	-100	LOC_Os02g21460	uncharacterized protein yqjG, putative, expressed
Val	3	QEI_02_12835432	2	-99	LOC_Os02g21470	expressed protein
Val	3	QEI_02_12835432	2	-96	LOC_Os02g21480	conserved hypothetical protein
Val	3	QEI_02_12835432	2	-88	LOC_Os02g21490	WD domain, G-beta repeat domain containing protein, expressed
Val	3	QEI_02_12835432	2	-80	LOC_Os02g21500	PE-PGRS family protein, putative
Val	3	QEI_02_12835432	2	-73	LOC_Os02g21510	NOL1/NOP2/sun family protein, putative, expressed
Val	3	QEI_02_12835432	2	-63	LOC_Os02g21520	chalcone isomerase 3, putative, expressed
Val	3	QEI_02_12835432	2	-56	LOC_Os02g21530	expressed protein
Val	3	QEI_02_12835432	2	-52	LOC_Os02g21540	hypothetical protein
Val	3	QEI_02_12835432	2	-44	LOC_Os02g21550	flavonol synthase/flavanone 3-hydroxylase, putative, expressed
Val	3	QEI_02_12835432	2	-30	LOC_Os02g21560	retrotransposon protein, putative, unclassified
Val	3	QEI_02_12835432	2	-22	LOC_Os02g21570	expressed protein
Val	3	QEI_02_12835432	2	-18	LOC_Os02g21580	PPR repeat containing protein
Val	3	QEI_02_12835432	2	-7	LOC_Os02g21590	retrotransposon, putative, centromere-specific
Val	3	QEI_02_12835432	2	-2	LOC_Os02g21600	transposon protein, putative, CACTA, En/Spm sub-class
Val	3	QEI_02_12835432	2	0	LOC_Os02g21610	retrotransposon protein, putative, unclassified
Val	3	QEI_02_12835432	2	3	LOC_Os02g21620	retrotransposon protein, putative, unclassified
Val	3	QEI_02_12835432	2	11	LOC_Os02g21630	SEC14 cytosolic factor family protein, putative, expressed
Val	3	QEI_02_12835432	2	16	LOC_Os02g21640	expressed protein
Val	3	QEI_02_12835432	2	24	LOC_Os02g21650	prefoldin, putative, expressed
Val	3	QEI_02_12835432	2	34	LOC_Os02g21660	L1P family of ribosomal proteins domain containing protein, expressed
Val	3	QEI_02_12835432	2	41	LOC_Os02g21670	hypothetical protein
Val	3	QEI_02_12835432	2	50	LOC_Os02g21680	hypothetical protein
Val	3	QEI_02_12835432	2	52	LOC_Os02g21685	conserved hypothetical protein
Val	3	QEI_02_12835432	2	58	LOC_Os02g21700	STE_MEKK_ste11_MAP3K.8 - STE kinases include homologs to sterile 7, sterile 11 and sterile 20 from yeast, expressed
Val	3	QEI_02_12835432	2	72	LOC_Os02g21710	Ras family domain containing protein
Val	3	QEI_02_12835432	2	73	LOC_Os02g21720	transposon protein, putative, CACTA, En/Spm sub-class
Val	3	QEI_02_12835432	2	78	LOC_Os02g21730	transposon protein, putative, CACTA, En/Spm sub-class
Val	3	QEI_02_12835432	2	83	LOC_Os02g21740	retrotransposon protein, putative, unclassified
Val	3	QEI_02_12835432	2	88	LOC_Os02g21750	MDR-like ABC transporter, putative, expressed
Val	3	QEI_02_12835432	2	100	LOC_Os02g21760	hypothetical protein
Val	3	QEI_02_12835432	2	104	LOC_Os02g21770	hypothetical protein
Val	3	QEI_02_12835432	2	109	LOC_Os02g21780	retrotransposon protein, putative, unclassified
Val	3	QEI_02_12835432	2	110	LOC_Os02g21790	retrotransposon protein, putative, unclassified
Val	3	QEI_02_12835432	2	119	LOC_Os02g21800	retrotransposon, putative, centromere-specific
Val	4	QEI_03_08713916	3	Distance(kb)	LOC_Os03g15590	eukaryotic translation initiation factor, putative, expressed
Val	4	QEI_03_08713916	3	-114	LOC_Os03g15600	expressed protein
Val	4	QEI_03_08713916	3	-105	LOC_Os03g15610	retrotransposon protein, putative, unclassified
Val	4	QEI_03_08713916	3	-100	LOC_Os03g15620	retrotransposon protein, putative, unclassified
Val	4	QEI_03_08713916	3	-93	LOC_Os03g15630	harpin-induced protein 1 domain containing protein, expressed
Val	4	QEI_03_08713916	3	-90	LOC_Os03g15640	hypothetical protein
Val	4	QEI_03_08713916	3	-86	LOC_Os03g15650	vacuolar sorting protein, putative, expressed
Val	4	QEI_03_08713916	3	-79	LOC_Os03g15660	AP2 domain containing protein, expressed
Val	4	QEI_03_08713916	3	-77	LOC_Os03g15670	hypothetical protein
Val	4	QEI_03_08713916	3	-72	LOC_Os03g15680	nodulation-signaling pathway 2 protein, putative
Val	4	QEI_03_08713916	3	-61	LOC_Os03g15690	phosphate carrier protein, mitochondrial precursor, putative, expressed
Val	4	QEI_03_08713916	3	-54	LOC_Os03g15700	splicing factor 3A subunit 2, putative, expressed
Val	4	QEI_03_08713916	3	-51	LOC_Os03g15710	strictosidine synthase, putative, expressed
Val	4	QEI_03_08713916	3	-48	LOC_Os03g15720	expressed protein
Val	4	QEI_03_08713916	3	-43	LOC_Os03g15730	S-RNase-binding protein, putative, expressed
Val	4	QEI_03_08713916	3	-38	LOC_Os03g15740	uncharacterized TPR repeat-containing protein, putative, expressed
Val	4	QEI_03_08713916	3	-32	LOC_Os03g15750	ASC1, putative, expressed
Val	4	QEI_03_08713916	3	-27	LOC_Os03g15760	conserved hypothetical protein
Val	4	QEI_03_08713916	3	-22	LOC_Os03g15770	tyrosine protein kinase domain containing protein, putative, expressed
Val	4	QEI_03_08713916	3	-12	LOC_Os03g15780	anthranilate synthase component I-1, chloroplast precursor, putative, expressed
Val	4	QEI_03_08713916	3	-7	LOC_Os03g15790	ZOS3-08 - C2H2 zinc finger protein, expressed
Val	4	QEI_03_08713916	3	0	LOC_Os03g15800	B4-BTB2 - Bric-a-Brac, Tramtrack, Broad Complex BTB domain with B4 subfamily conserved sequence, expressed
Val	4	QEI_03_08713916	3	3	LOC_Os03g15810	AAA-type ATPase family protein, putative, expressed
Val	4	QEI_03_08713916	3	5	LOC_Os03g15820	hypothetical protein
Val	4	QEI_03_08713916	3	13	LOC_Os03g15830	transposon protein, putative, unclassified
Val	4	QEI_03_08713916	3	17	LOC_Os03g15840	glycosyl transferase, group 1 domain containing protein, expressed
Val	4	QEI_03_08713916	3	22	LOC_Os03g15850	josephin, putative, expressed
Val	4	QEI_03_08713916	3	26	LOC_Os03g15860	mitochondrial carrier protein, putative, expressed
Val	4	QEI_03_08713916	3	34	LOC_Os03g15870	ribosomal protein L4, putative, expressed
Val	4	QEI_03_08713916	3	38	LOC_Os03g15880	coronatine-insensitive protein, putative, expressed
Val	4	QEI_03_08713916	3	46	LOC_Os03g15890	RNA recognition motif containing protein, expressed
Val	4	QEI_03_08713916	3	52	LOC_Os03g15900	SH3 domain containing protein, expressed
Val	4	QEI_03_08713916	3	61	LOC_Os03g15910	membrane protein, putative, expressed
Val	4	QEI_03_08713916	3	73	LOC_Os03g15920	expressed protein
Val	4	QEI_03_08713916	3	73	LOC_Os03g15930	OTU-like cysteine protease family protein, putative, expressed
Val	4	QEI_03_08713916	3	75	LOC_Os03g15940	OsWLIM2 - LIM domain protein, putative actin-binding protein and transcription factor, expressed
Val	4	QEI_03_08713916	3	82	LOC_Os03g15950	enolase, putative, expressed
Val	4	QEI_03_08713916	3	85	LOC_Os03g15960	hsp20/alpha crystallin family protein, putative, expressed
Val	4	QEI_03_08713916	3	90	LOC_Os03g15970	transposon protein, putative, Mariner sub-class
Val	4	QEI_03_08713916	3	92	LOC_Os03g15980	hypothetical protein
Val	4	QEI_03_08713916	3	94	LOC_Os03g15990	EDM2, putative
Val	4	QEI_03_08713916	3	100	LOC_Os03g16000	src homology-3 domain protein 3, putative, expressed
Val	4	QEI_03_08713916	3	104	LOC_Os03g16010	BRASSINOSTEROID INSENSITIVE 1-associated receptor kinase 1 precursor, putative, expressed
Val	4	QEI_03_08713916	3	112	LOC_Os03g16020	hsp20/alpha crystallin family protein, putative
Val	4	QEI_03_08713916	3	118	LOC_Os03g16030	hsp20/alpha crystallin family protein, putative, expressed
Val	5	QEI_03_29912150	3	-118	LOC_Os03g51960	expressed protein
Val	5	QEI_03_29912150	3	-93	LOC_Os03g51970	growth-regulating factor, putative, expressed
Val	5	QEI_03_29912150	3	-90	LOC_Os03g51980	expressed protein
Val	5	QEI_03_29912150	3	-87	LOC_Os03g51984	differentiation protein, putative, expressed
Val	5	QEI_03_29912150	3	-80	LOC_Os03g51990	ACT domain containing protein, expressed
Val	5	QEI_03_29912150	3	-75	LOC_Os03g52000	BSD domain containing protein, expressed
Val	5	QEI_03_29912150	3	-72	LOC_Os03g52010	lecithin cholesterol acyltransferase, putative, expressed
Val	5	QEI_03_29912150	3	-66	LOC_Os03g52020	expressed protein
Val	5	QEI_03_29912150	3	-63	LOC_Os03g52030	conserved hypothetical protein
Val	5	QEI_03_29912150	3	-54	LOC_Os03g52040	OsSCP19 - Putative Serine Carboxypeptidase homologue, expressed
Val	5	QEI_03_29912150	3	-40	LOC_Os03g52070	OsSCP20 - Putative Serine Carboxypeptidase homologue, expressed
Val	5	QEI_03_29912150	3	-31	LOC_Os03g52080	OsSCP21 - Putative Serine Carboxypeptidase homologue, expressed
Val	5	QEI_03_29912150	3	-8	LOC_Os03g52090	calcium-transporting ATPase 3, endoplasmic reticulum-type, putative
Val	5	QEI_03_29912150	3	-1	LOC_Os03g52100	retrotransposon protein, putative, Ty3-gypsy subclass
Val	5	QEI_03_29912150	3	8	LOC_Os03g52120	DNA binding protein, putative, expressed
Val	5	QEI_03_29912150	3	12	LOC_Os03g52130	expressed protein
Val	5	QEI_03_29912150	3	13	LOC_Os03g52140	hypothetical protein
Val	5	QEI_03_29912150	3	18	LOC_Os03g52150	metalloendopeptidase/ metallopeptidase/ zinc ion binding protein, putative, expressed
Val	5	QEI_03_29912150	3	29	LOC_Os03g52160	regulatory protein, putative, expressed
Val	5	QEI_03_29912150	3	30	LOC_Os03g52170	4-hydroxy-3-methylbut-2-enyl diphosphate reductase, putative, expressed
Val	5	QEI_03_29912150	3	37	LOC_Os03g52180	4-hydroxy-3-methylbut-2-enyl diphosphate reductase, putative, expressed
Val	5	QEI_03_29912150	3	41	LOC_Os03g52190	retrotransposon protein, putative, unclassified
Val	5	QEI_03_29912150	3	48	LOC_Os03g52200	retrotransposon protein, putative, unclassified
Val	5	QEI_03_29912150	3	51	LOC_Os03g52210	retrotransposon protein, putative, Ty3-gypsy subclass
Val	5	QEI_03_29912150	3	57	LOC_Os03g52230	dynamin-2B, putative
Val	5	QEI_03_29912150	3	83	LOC_Os03g52239	homeobox domain containing protein, expressed
Val	5	QEI_03_29912150	3	94	LOC_Os03g52258	hypothetical protein
Val	5	QEI_03_29912150	3	103	LOC_Os03g52280	expressed protein
Val	5	QEI_03_29912150	3	107	LOC_Os03g52284	hypothetical protein
Val	5	QEI_03_29912150	3	113	LOC_Os03g52290	DUF617 domain containing protein
Val	5	QEI_03_29912150	3	114	LOC_Os03g52300	SCP-like extracellular protein
Val	6	QEI_04_00943094	4	-109	LOC_Os04g02350	transposon protein, putative, unclassified
Val	6	QEI_04_00943094	4	-106	LOC_Os04g02354	expressed protein
Val	6	QEI_04_00943094	4	-101	LOC_Os04g02360	transposon protein, putative, CACTA, En/Spm sub-class
Val	6	QEI_04_00943094	4	-89	LOC_Os04g02370	transposon protein, putative, unclassified
Val	6	QEI_04_00943094	4	-88	LOC_Os04g02375	hypothetical protein
Val	6	QEI_04_00943094	4	-86	LOC_Os04g02380	hypothetical protein
Val	6	QEI_04_00943094	4	-83	LOC_Os04g02390	transposon protein, putative, CACTA, En/Spm sub-class
Val	6	QEI_04_00943094	4	-82	LOC_Os04g02400	conserved hypothetical protein
Val	6	QEI_04_00943094	4	-75	LOC_Os04g02410	hypothetical protein
Val	6	QEI_04_00943094	4	-67	LOC_Os04g02420	transposon protein, putative, unclassified
Val	6	QEI_04_00943094	4	-59	LOC_Os04g02434	transposon protein, putative, unclassified
Val	6	QEI_04_00943094	4	-53	LOC_Os04g02450	rust-resistance protein Lr21, putative
Val	6	QEI_04_00943094	4	-49	LOC_Os04g02460	retrotransposon protein, putative, unclassified
Val	6	QEI_04_00943094	4	-48	LOC_Os04g02470	expressed protein
Val	6	QEI_04_00943094	4	-44	LOC_Os04g02480	NBS-LRR, putative
Val	6	QEI_04_00943094	4	-43	LOC_Os04g02490	hypothetical protein
Val	6	QEI_04_00943094	4	-34	LOC_Os04g02500	G-patch domain containing protein, expressed
Val	6	QEI_04_00943094	4	-26	LOC_Os04g02510	ZOS4-01 - C2H2 zinc finger protein, expressed
Val	6	QEI_04_00943094	4	-14	LOC_Os04g02520	Leucine Rich Repeat family protein
Val	6	QEI_04_00943094	4	-4	LOC_Os04g02530	expressed protein
Val	6	QEI_04_00943094	4	0	LOC_Os04g02550	expressed protein
Val	6	QEI_04_00943094	4	11	LOC_Os04g02560	expressed protein
Val	6	QEI_04_00943094	4	19	LOC_Os04g02570	hypothetical protein
Val	6	QEI_04_00943094	4	20	LOC_Os04g02580	expressed protein
Val	6	QEI_04_00943094	4	23	LOC_Os04g02590	hypothetical protein
Val	6	QEI_04_00943094	4	26	LOC_Os04g02600	retrotransposon protein, putative, LINE subclass
Val	6	QEI_04_00943094	4	32	LOC_Os04g02610	hypothetical protein
Val	6	QEI_04_00943094	4	37	LOC_Os04g02620	oxidoreductase, short chain dehydrogenase/reductase family, putative, expressed
Val	6	QEI_04_00943094	4	43	LOC_Os04g02630	retrotransposon protein, putative, unclassified
Val	6	QEI_04_00943094	4	49	LOC_Os04g02640	3-ketoacyl-CoA synthase 6, putative, expressed
Val	6	QEI_04_00943094	4	52	LOC_Os04g02650	expressed protein
Val	6	QEI_04_00943094	4	56	LOC_Os04g02660	retrotransposon protein, putative, unclassified
Val	6	QEI_04_00943094	4	60	LOC_Os04g02670	hypothetical protein
Val	6	QEI_04_00943094	4	67	LOC_Os04g02680	expressed protein
Val	6	QEI_04_00943094	4	76	LOC_Os04g02690	pattern formation protein EMB30, putative, expressed
Val	6	QEI_04_00943094	4	82	LOC_Os04g02700	retrotransposon protein, putative, unclassified
Val	6	QEI_04_00943094	4	86	LOC_Os04g02710	retrotransposon protein, putative, unclassified
Val	6	QEI_04_00943094	4	95	LOC_Os04g02720	potassium channel KAT2, putative
Val	6	QEI_04_00943094	4	99	LOC_Os04g02730	tRNA-dihydrouridine synthase 3-like, putative, expressed
Val	7	QEI_05_03167614	5	-120	LOC_Os05g06100	E3 ubiquitin-protein ligase SINA-like 2, putative
Val	7	QEI_05_03167614	5	-110	LOC_Os05g06110	villin, putative, expressed
Val	7	QEI_05_03167614	5	-105	LOC_Os05g06120	ubiquitin conjugating enzyme protein, putative
Val	7	QEI_05_03167614	5	-100	LOC_Os05g06130	transcription factor X1, putative, expressed
Val	7	QEI_05_03167614	5	-93	LOC_Os05g06140	lipase, putative, expressed
Val	7	QEI_05_03167614	5	-82	LOC_Os05g06150	vegetative storage protein, putative, expressed
Val	7	QEI_05_03167614	5	-72	LOC_Os05g06160	trehalose phosphatase, putative
Val	7	QEI_05_03167614	5	-68	LOC_Os05g06170	FAR1 family protein
Val	7	QEI_05_03167614	5	-67	LOC_Os05g06180	hypothetical protein
Val	7	QEI_05_03167614	5	-59	LOC_Os05g06190	conserved hypothetical protein
Val	7	QEI_05_03167614	5	-44	LOC_Os05g06200	transposon protein, putative, unclassified
Val	7	QEI_05_03167614	5	-40	LOC_Os05g06210	transposon protein, putative, CACTA, En/Spm sub-class
Val	7	QEI_05_03167614	5	-38	LOC_Os05g06220	hypothetical protein
Val	7	QEI_05_03167614	5	-11	LOC_Os05g06230	hypothetical protein
Val	7	QEI_05_03167614	5	-9	LOC_Os05g06240	LRR receptor kinase, putative
Val	7	QEI_05_03167614	5	11	LOC_Os05g06250	conserved hypothetical protein
Val	7	QEI_05_03167614	5	13	LOC_Os05g06260	Spc97 / Spc98 family protein, putative, expressed
Val	7	QEI_05_03167614	5	22	LOC_Os05g06270	zinc finger, C3HC4 type domain containing protein, expressed
Val	7	QEI_05_03167614	5	35	LOC_Os05g06280	ATKINESIN-13A/KINESIN-13A, putative, expressed
Val	7	QEI_05_03167614	5	46	LOC_Os05g06290	expressed protein
Val	7	QEI_05_03167614	5	52	LOC_Os05g06300	3-hydroxyacyl-CoA dehydrogenase, putative, expressed
Val	7	QEI_05_03167614	5	62	LOC_Os05g06310	60S ribosomal protein L18-3, putative, expressed
Val	7	QEI_05_03167614	5	65	LOC_Os05g06320	ethylene receptor, putative, expressed
Val	7	QEI_05_03167614	5	73	LOC_Os05g06330	nifU, putative, expressed
Val	7	QEI_05_03167614	5	77	LOC_Os05g06340	GATA zinc finger domain containing protein
Val	7	QEI_05_03167614	5	83	LOC_Os05g06350	importin subunit alpha, putative, expressed
Val	7	QEI_05_03167614	5	89	LOC_Os05g06360	heparan-alpha-glucosaminide N-acetyltransferase, putative, expressed
Val	7	QEI_05_03167614	5	95	LOC_Os05g06370	retrotransposon protein, putative, unclassified
Val	7	QEI_05_03167614	5	101	LOC_Os05g06380	transferase family protein, putative, expressed
Val	7	QEI_05_03167614	5	103	LOC_Os05g06390	retrotransposon protein, putative, unclassified
Val	7	QEI_05_03167614	5	116	LOC_Os05g06399	expressed protein
Val	8	QEI_05_19754561	5	-118	LOC_Os05g33530	hypothetical protein
Val	8	QEI_05_19754561	5	-112	LOC_Os05g33550	methyl-binding domain protein MBD, putative, expressed
Val	8	QEI_05_19754561	5	-109	LOC_Os05g33554	methyl-binding domain protein MBD, putative, expressed
Val	8	QEI_05_19754561	5	-101	LOC_Os05g33560	hypothetical protein
Val	8	QEI_05_19754561	5	-79	LOC_Os05g33570	pyruvate, phosphate dikinase, chloroplast precursor, putative, expressed
Val	8	QEI_05_19754561	5	-76	LOC_Os05g33580	expressed protein
Val	8	QEI_05_19754561	5	-72	LOC_Os05g33590	cytochrome P450, putative, expressed
Val	8	QEI_05_19754561	5	-58	LOC_Os05g33600	cytochrome P450 72A1, putative, expressed
Val	8	QEI_05_19754561	5	-42	LOC_Os05g33610	expressed protein
Val	8	QEI_05_19754561	5	-36	LOC_Os05g33620	expressed protein
Val	8	QEI_05_19754561	5	-31	LOC_Os05g33630	inosine-uridine preferring nucleoside hydrolase family protein, putative, expressed
Val	8	QEI_05_19754561	5	-11	LOC_Os05g33644	inosine-uridine preferring nucleoside hydrolase family protein, putative, expressed
Val	8	QEI_05_19754561	5	-5	LOC_Os05g33660	hypothetical protein
Val	8	QEI_05_19754561	5	-3	LOC_Os05g33670	hypothetical protein
Val	8	QEI_05_19754561	5	11	LOC_Os05g33690	receptor-like protein kinase precursor, putative, expressed
Val	8	QEI_05_19754561	5	16	LOC_Os05g33700	4F5 protein family protein
Val	8	QEI_05_19754561	5	20	LOC_Os05g33710	WD domain, G-beta repeat domain containing protein, expressed
Val	8	QEI_05_19754561	5	46	LOC_Os05g33720	retrotransposon protein, putative, unclassified
Val	8	QEI_05_19754561	5	51	LOC_Os05g33730	gibberellin receptor GID1L2, putative, expressed
Val	8	QEI_05_19754561	5	59	LOC_Os05g33740	retrotransposon protein, putative, unclassified
Val	8	QEI_05_19754561	5	61	LOC_Os05g33750	retrotransposon protein, putative, unclassified
Val	8	QEI_05_19754561	5	77	LOC_Os05g33760	PPR repeat domain containing protein, putative, expressed
Val	8	QEI_05_19754561	5	83	LOC_Os05g33770	conserved hypothetical protein
Val	8	QEI_05_19754561	5	85	LOC_Os05g33780	hypothetical protein
Val	8	QEI_05_19754561	5	93	LOC_Os05g33790	retrotransposon protein, putative, Ty1-copia subclass
Val	8	QEI_05_19754561	5	100	LOC_Os05g33800	retrotransposon, putative, centromere-specific
Val	8	QEI_05_19754561	5	106	LOC_Os05g33810	OsSPL9 - SBP-box gene family member, expressed
Val	8	QEI_05_19754561	5	117	LOC_Os05g33820	lipase, putative, expressed
Val	9	QEI_06_05320615	6	-109	LOC_Os06g10170	flavin-containing monooxygenase family protein, putative, expressed
Val	9	QEI_06_05320615	6	-107	LOC_Os06g10180	flavin-containing monooxygenase 1, putative
Val	9	QEI_06_05320615	6	-103	LOC_Os06g10190	flavin-containing monooxygenase 2, putative
Val	9	QEI_06_05320615	6	-96	LOC_Os06g10200	adenylate kinase, putative, expressed
Val	9	QEI_06_05320615	6	-89	LOC_Os06g10210	expressed protein
Val	9	QEI_06_05320615	6	-81	LOC_Os06g10220	conserved hypothetical protein
Val	9	QEI_06_05320615	6	-69	LOC_Os06g10230	receptor-like protein kinase 5 precursor, putative, expressed
Val	9	QEI_06_05320615	6	-67	LOC_Os06g10240	hypothetical protein
Val	9	QEI_06_05320615	6	-60	LOC_Os06g10250	hypothetical protein
Val	9	QEI_06_05320615	6	-55	LOC_Os06g10260	cytochrome P450, putative
Val	9	QEI_06_05320615	6	-35	LOC_Os06g10280	CDP-alcohol phosphatidyltransferase, putative, expressed
Val	9	QEI_06_05320615	6	-28	LOC_Os06g10290	OsFBX191 - F-box domain containing protein
Val	9	QEI_06_05320615	6	-23	LOC_Os06g10300	OsFBL29 - F-box domain and LRR containing protein, expressed
Val	9	QEI_06_05320615	6	-20	LOC_Os06g10310	growth regulating factor protein, putative, expressed
Val	9	QEI_06_05320615	6	-14	LOC_Os06g10320	hypothetical protein
Val	9	QEI_06_05320615	6	-13	LOC_Os06g10330	myb-related protein 308, putative
Val	9	QEI_06_05320615	6	-11	LOC_Os06g10340	autophagy-related protein 12, putative, expressed
Val	9	QEI_06_05320615	6	-4	LOC_Os06g10350	MYB family transcription factor, putative, expressed
Val	9	QEI_06_05320615	6	-2	LOC_Os06g10355	expressed protein
Val	9	QEI_06_05320615	6	1	LOC_Os06g10360	transposon protein, putative, CACTA, En/Spm sub-class
Val	9	QEI_06_05320615	6	6	LOC_Os06g10370	transposon protein, putative, CACTA, En/Spm sub-class
Val	9	QEI_06_05320615	6	11	LOC_Os06g10380	transposon protein, putative, CACTA, En/Spm sub-class
Val	9	QEI_06_05320615	6	15	LOC_Os06g10390	retrotransposon protein, putative, unclassified
Val	9	QEI_06_05320615	6	20	LOC_Os06g10400	hypothetical protein
Val	9	QEI_06_05320615	6	23	LOC_Os06g10410	uncharacterized mscS family protein, putative, expressed
Val	9	QEI_06_05320615	6	35	LOC_Os06g10420	nitrilase, putative, expressed
Val	9	QEI_06_05320615	6	37	LOC_Os06g10430	protein of unknown function DUF1296 domain containing protein, expressed
Val	9	QEI_06_05320615	6	47	LOC_Os06g10440	gb protein, putative, expressed
Val	9	QEI_06_05320615	6	53	LOC_Os06g10450	expressed protein
Val	9	QEI_06_05320615	6	64	LOC_Os06g10460	hypothetical protein
Val	9	QEI_06_05320615	6	66	LOC_Os06g10470	ZOS6-02 - C2H2 zinc finger protein
Val	9	QEI_06_05320615	6	71	LOC_Os06g10480	expressed protein
Val	9	QEI_06_05320615	6	87	LOC_Os06g10510	oxidoreductase/ transition metal ion binding protein, putative, expressed
Val	9	QEI_06_05320615	6	99	LOC_Os06g10520	pantothenate kinase, putative, expressed
Val	9	QEI_06_05320615	6	109	LOC_Os06g10530	expressed protein
Val	9	QEI_06_05320615	6	111	LOC_Os06g10540	hypothetical protein
Val	9	QEI_06_05320615	6	117	LOC_Os06g10550	retrotransposon protein, putative, unclassified
Val	10	QEI_06_10883433	6	-116	LOC_Os06g18940	retrotransposon protein, putative, Ty3-gypsy subclass
Val	10	QEI_06_10883433	6	-109	LOC_Os06g18950	retrotransposon protein, putative, Ty3-gypsy subclass
Val	10	QEI_06_10883433	6	-99	LOC_Os06g18960	embryogenesis transmembrane protein, putative, expressed
Val	10	QEI_06_10883433	6	-85	LOC_Os06g18970	expressed protein
Val	10	QEI_06_10883433	6	-80	LOC_Os06g18980	expressed protein
Val	10	QEI_06_10883433	6	-74	LOC_Os06g18990	embryogenesis transmembrane protein, putative, expressed
Val	10	QEI_06_10883433	6	-72	LOC_Os06g19000	hypothetical protein
Val	10	QEI_06_10883433	6	-68	LOC_Os06g19010	cadmium tolerance factor, putative, expressed
Val	10	QEI_06_10883433	6	-64	LOC_Os06g19020	hypothetical protein
Val	10	QEI_06_10883433	6	-61	LOC_Os06g19030	retrotransposon protein, putative, unclassified
Val	10	QEI_06_10883433	6	-54	LOC_Os06g19040	retrotransposon protein, putative, Ty1-copia subclass
Val	10	QEI_06_10883433	6	-49	LOC_Os06g19050	embryogenesis transmembrane protein, putative
Val	10	QEI_06_10883433	6	-43	LOC_Os06g19060	hypothetical protein
Val	10	QEI_06_10883433	6	-38	LOC_Os06g19070	cytochrome P450, putative, expressed
Val	10	QEI_06_10883433	6	-31	LOC_Os06g19080	transposon protein, putative, CACTA, En/Spm sub-class
Val	10	QEI_06_10883433	6	-21	LOC_Os06g19090	hypothetical protein
Val	10	QEI_06_10883433	6	-16	LOC_Os06g19095	expressed protein
Val	10	QEI_06_10883433	6	-14	LOC_Os06g19100	retrotransposon protein, putative, unclassified
Val	10	QEI_06_10883433	6	-9	LOC_Os06g19110	cadmium tolerance factor, putative, expressed
Val	10	QEI_06_10883433	6	-7	LOC_Os06g19120	hypothetical protein
Val	10	QEI_06_10883433	6	8	LOC_Os06g19140	retrotransposon, putative, centromere-specific
Val	10	QEI_06_10883433	6	10	LOC_Os06g19150	retrotransposon protein, putative, unclassified
Val	10	QEI_06_10883433	6	16	LOC_Os06g19160	retrotransposon protein, putative, Ty1-copia subclass
Val	10	QEI_06_10883433	6	27	LOC_Os06g19170	cadmium tolerance factor, putative, expressed
Val	10	QEI_06_10883433	6	35	LOC_Os06g19180	hypothetical protein
Val	10	QEI_06_10883433	6	42	LOC_Os06g19200	hypothetical protein
Val	10	QEI_06_10883433	6	47	LOC_Os06g19210	cadmium tolerance factor, putative, expressed
Val	10	QEI_06_10883433	6	51	LOC_Os06g19220	hypothetical protein
Val	10	QEI_06_10883433	6	53	LOC_Os06g19230	transposon protein, putative, unclassified
Val	10	QEI_06_10883433	6	62	LOC_Os06g19240	retrotransposon protein, putative, Ty3-gypsy subclass
Val	10	QEI_06_10883433	6	71	LOC_Os06g19250	conserved hypothetical protein
Val	10	QEI_06_10883433	6	73	LOC_Os06g19260	cadmium tolerance factor, putative, expressed
Val	10	QEI_06_10883433	6	83	LOC_Os06g19279	transposon protein, putative, CACTA, En/Spm sub-class
Val	10	QEI_06_10883433	6	89	LOC_Os06g19300	cadmium tolerance factor, putative
Val	10	QEI_06_10883433	6	93	LOC_Os06g19310	transposon protein, putative, CACTA, En/Spm sub-class
Val	10	QEI_06_10883433	6	100	LOC_Os06g19320	retrotransposon protein, putative, Ty3-gypsy subclass
Val	10	QEI_06_10883433	6	105	LOC_Os06g19330	retrotransposon protein, putative, unclassified
Val	10	QEI_06_10883433	6	117	LOC_Os06g19340	hypothetical protein
Val	11	QEI_06_12183485	6	-119	LOC_Os06g20879	expressed protein
Val	11	QEI_06_12183485	6	-108	LOC_Os06g20890	retrotransposon protein, putative, unclassified
Val	11	QEI_06_12183485	6	-105	LOC_Os06g20900	expressed protein
Val	11	QEI_06_12183485	6	-95	LOC_Os06g20920	SAM dependent carboxyl methyltransferase, putative, expressed
Val	11	QEI_06_12183485	6	-84	LOC_Os06g20930	retrotransposon protein, putative, unclassified
Val	11	QEI_06_12183485	6	-75	LOC_Os06g20940	retrotransposon protein, putative, Ty1-copia subclass
Val	11	QEI_06_12183485	6	-73	LOC_Os06g20950	retrotransposon protein, putative, Ty1-copia subclass
Val	11	QEI_06_12183485	6	-65	LOC_Os06g20960	SAM dependent carboxyl methyltransferase, putative
Val	11	QEI_06_12183485	6	-62	LOC_Os06g20970	transposon protein, putative, CACTA, En/Spm sub-class
Val	11	QEI_06_12183485	6	-60	LOC_Os06g20980	transposon protein, putative, CACTA, En/Spm sub-class
Val	11	QEI_06_12183485	6	-56	LOC_Os06g20990	transposon protein, putative, CACTA, En/Spm sub-class
Val	11	QEI_06_12183485	6	-51	LOC_Os06g21000	transposon protein, putative, CACTA, En/Spm sub-class
Val	11	QEI_06_12183485	6	-45	LOC_Os06g21010	transposon protein, putative, unclassified
Val	11	QEI_06_12183485	6	-39	LOC_Os06g21020	methyltransferase, putative
Val	11	QEI_06_12183485	6	-32	LOC_Os06g21030	transposon protein, putative, CACTA, En/Spm sub-class
Val	11	QEI_06_12183485	6	-27	LOC_Os06g21040	transposon protein, putative, CACTA, En/Spm sub-class
Val	11	QEI_06_12183485	6	-20	LOC_Os06g21050	retrotransposon protein, putative, Ty3-gypsy subclass
Val	11	QEI_06_12183485	6	-11	LOC_Os06g21059	retrotransposon protein, putative, Ty3-gypsy subclass
Val	11	QEI_06_12183485	6	-9	LOC_Os06g21068	retrotransposon protein, putative, Ty3-gypsy subclass
Val	11	QEI_06_12183485	6	-5	LOC_Os06g21080	retrotransposon protein, putative, unclassified
Val	11	QEI_06_12183485	6	2	LOC_Os06g21099	expressed protein
Val	11	QEI_06_12183485	6	10	LOC_Os06g21110	expressed protein
Val	11	QEI_06_12183485	6	12	LOC_Os06g21120	expressed protein
Val	11	QEI_06_12183485	6	22	LOC_Os06g21130	retrotransposon protein, putative, unclassified
Val	11	QEI_06_12183485	6	27	LOC_Os06g21140	glycine-rich cell wall structural protein precursor, putative, expressed
Val	11	QEI_06_12183485	6	32	LOC_Os06g21150	transposon protein, putative, CACTA, En/Spm sub-class
Val	11	QEI_06_12183485	6	38	LOC_Os06g21160	transposon protein, putative, CACTA, En/Spm sub-class
Val	11	QEI_06_12183485	6	49	LOC_Os06g21170	retrotransposon protein, putative, Ty1-copia subclass
Val	11	QEI_06_12183485	6	53	LOC_Os06g21180	retrotransposon protein, putative, unclassified
Val	11	QEI_06_12183485	6	59	LOC_Os06g21190	retrotransposon protein, putative, unclassified
Val	11	QEI_06_12183485	6	64	LOC_Os06g21200	retrotransposon protein, putative, Ty1-copia subclass
Val	11	QEI_06_12183485	6	67	LOC_Os06g21210	glycine rich protein family protein, putative, expressed
Val	11	QEI_06_12183485	6	76	LOC_Os06g21220	glycine rich protein family protein, putative
Val	11	QEI_06_12183485	6	88	LOC_Os06g21230	glycine rich protein family protein, putative, expressed
Val	11	QEI_06_12183485	6	95	LOC_Os06g21240	glycine rich protein family protein, putative, expressed
Val	11	QEI_06_12183485	6	103	LOC_Os06g21250	glycine rich protein family protein, putative, expressed
Val	11	QEI_06_12183485	6	107	LOC_Os06g21260	retrotransposon protein, putative, unclassified
Val	11	QEI_06_12183485	6	113	LOC_Os06g21270	glycine rich protein family protein, putative, expressed
Val	11	QEI_06_12183485	6	117	LOC_Os06g21280	transposon protein, putative, CACTA, En/Spm sub-class
Val	12	QEI_06_22994271	6	-89	LOC_Os06g38603	retrotransposon protein, putative, unclassified
Val	12	QEI_06_22994271	6	-82	LOC_Os06g38606	retrotransposon protein, putative, Ty3-gypsy subclass
Val	12	QEI_06_22994271	6	-74	LOC_Os06g38609	retrotransposon protein, putative, unclassified
Val	12	QEI_06_22994271	6	-69	LOC_Os06g38612	retrotransposon protein, putative, unclassified
Val	12	QEI_06_22994271	6	-65	LOC_Os06g38620	retrotransposon protein, putative, unclassified
Val	12	QEI_06_22994271	6	-54	LOC_Os06g38640	receptor-like protein kinase precursor, putative
Val	12	QEI_06_22994271	6	-40	LOC_Os06g38650	receptor-like protein kinase precursor, putative, expressed
Val	12	QEI_06_22994271	6	-37	LOC_Os06g38660	expressed protein
Val	12	QEI_06_22994271	6	-28	LOC_Os06g38670	receptor-like protein kinase precursor, putative
Val	12	QEI_06_22994271	6	-23	LOC_Os06g38680	expressed protein
Val	12	QEI_06_22994271	6	-12	LOC_Os06g38700	retrotransposon protein, putative, unclassified, expressed
Val	12	QEI_06_22994271	6	-10	LOC_Os06g38710	hypothetical protein
Val	12	QEI_06_22994271	6	-6	LOC_Os06g38720	conserved hypothetical protein
Val	12	QEI_06_22994271	6	3	LOC_Os06g38740	conserved hypothetical protein
Val	12	QEI_06_22994271	6	4	LOC_Os06g38750	proline-rich family protein, putative, expressed
Val	12	QEI_06_22994271	6	10	LOC_Os06g38760	retrotransposon protein, putative, unclassified
Val	12	QEI_06_22994271	6	17	LOC_Os06g38764	expressed protein
Val	12	QEI_06_22994271	6	20	LOC_Os06g38770	expressed protein
Val	12	QEI_06_22994271	6	22	LOC_Os06g38780	receptor-like protein kinase 2 precursor, putative, expressed
Val	12	QEI_06_22994271	6	28	LOC_Os06g38790	ZmEBE protein, putative
Val	12	QEI_06_22994271	6	38	LOC_Os06g38800	hypothetical protein
Val	12	QEI_06_22994271	6	43	LOC_Os06g38810	hypothetical protein
Val	12	QEI_06_22994271	6	48	LOC_Os06g38820	retrotransposon protein, putative, Ty1-copia subclass
Val	12	QEI_06_22994271	6	54	LOC_Os06g38830	receptor-like protein kinase precursor, putative, expressed
Val	12	QEI_06_22994271	6	59	LOC_Os06g38840	transposon protein, putative, CACTA, En/Spm sub-class
Val	12	QEI_06_22994271	6	62	LOC_Os06g38850	hypothetical protein
Val	12	QEI_06_22994271	6	71	LOC_Os06g38870	hypothetical protein
Val	12	QEI_06_22994271	6	74	LOC_Os06g38880	hypothetical protein
Val	12	QEI_06_22994271	6	78	LOC_Os06g38890	transposon protein, putative, unclassified
Val	12	QEI_06_22994271	6	86	LOC_Os06g38900	transposon protein, putative, unclassified
Val	12	QEI_06_22994271	6	91	LOC_Os06g38910	hypothetical protein
Val	12	QEI_06_22994271	6	93	LOC_Os06g38920	transposon protein, putative, CACTA, En/Spm sub-class
Val	12	QEI_06_22994271	6	98	LOC_Os06g38930	leucine-rich repeat receptor protein kinase EXS precursor, putative, expressed
Val	12	QEI_06_22994271	6	103	LOC_Os06g38940	RMD5 homolog A, putative, expressed
Val	12	QEI_06_22994271	6	109	LOC_Os06g38950	ABC transporter, ATP-binding protein, putative, expressed
Val	13	QEI_07_10432101	7	-120	LOC_Os07g17470	hypothetical protein
Val	13	QEI_07_10432101	7	-109	LOC_Os07g17480	retrotransposon protein, putative, unclassified
Val	13	QEI_07_10432101	7	-103	LOC_Os07g17490	hypothetical protein
Val	13	QEI_07_10432101	7	-87	LOC_Os07g17500	transposon protein, putative, CACTA, En/Spm sub-class
Val	13	QEI_07_10432101	7	-80	LOC_Os07g17510	transposon protein, putative, CACTA, En/Spm sub-class
Val	13	QEI_07_10432101	7	-77	LOC_Os07g17520	conserved hypothetical protein
Val	13	QEI_07_10432101	7	-66	LOC_Os07g17530	transposon protein, putative, CACTA, En/Spm sub-class
Val	13	QEI_07_10432101	7	-63	LOC_Os07g17540	transposon protein, putative, CACTA, En/Spm sub-class
Val	13	QEI_07_10432101	7	-59	LOC_Os07g17550	hypothetical protein
Val	13	QEI_07_10432101	7	-57	LOC_Os07g17560	expressed protein
Val	13	QEI_07_10432101	7	-56	LOC_Os07g17570	transposon protein, putative, unclassified
Val	13	QEI_07_10432101	7	-49	LOC_Os07g17580	retrotransposon protein, putative, Ty3-gypsy subclass
Val	13	QEI_07_10432101	7	-43	LOC_Os07g17590	retrotransposon protein, putative, Ty3-gypsy subclass
Val	13	QEI_07_10432101	7	-39	LOC_Os07g17600	retrotransposon protein, putative, Ty3-gypsy subclass
Val	13	QEI_07_10432101	7	-30	LOC_Os07g17610	retrotransposon protein, putative, Ty3-gypsy subclass
Val	13	QEI_07_10432101	7	-21	LOC_Os07g17620	retrotransposon protein, putative, Ty3-gypsy subclass
Val	13	QEI_07_10432101	7	-14	LOC_Os07g17630	retrotransposon protein, putative, Ty3-gypsy subclass
Val	13	QEI_07_10432101	7	-12	LOC_Os07g17640	transposon protein, putative, unclassified
Val	13	QEI_07_10432101	7	-5	LOC_Os07g17650	retrotransposon protein, putative, unclassified
Val	13	QEI_07_10432101	7	-1	LOC_Os07g17660	retrotransposon protein, putative, unclassified
Val	13	QEI_07_10432101	7	1	LOC_Os07g17680	ribosomal RNA apurinic site specific lyase, putative
Val	13	QEI_07_10432101	7	7	LOC_Os07g17689	expressed protein
Val	13	QEI_07_10432101	7	15	LOC_Os07g17700	retrotransposon protein, putative, unclassified
Val	13	QEI_07_10432101	7	25	LOC_Os07g17710	retrotransposon protein, putative, Ty3-gypsy subclass
Val	13	QEI_07_10432101	7	28	LOC_Os07g17720	retrotransposon protein, putative, Ty3-gypsy subclass
Val	13	QEI_07_10432101	7	37	LOC_Os07g17730	retrotransposon protein, putative, unclassified
Val	13	QEI_07_10432101	7	45	LOC_Os07g17740	hypothetical protein
Val	13	QEI_07_10432101	7	52	LOC_Os07g17750	retrotransposon protein, putative, unclassified
Val	13	QEI_07_10432101	7	57	LOC_Os07g17760	hypothetical protein
Val	13	QEI_07_10432101	7	66	LOC_Os07g17770	tryptophanyl-tRNA synthetase, cytoplasmic, putative
Val	13	QEI_07_10432101	7	72	LOC_Os07g17780	transposon protein, putative, unclassified
Val	13	QEI_07_10432101	7	88	LOC_Os07g17790	retrotransposon protein, putative, Ty3-gypsy subclass
Val	13	QEI_07_10432101	7	95	LOC_Os07g17800	retrotransposon protein, putative, Ty3-gypsy subclass
Val	13	QEI_07_10432101	7	104	LOC_Os07g17810	retrotransposon protein, putative, Ty3-gypsy subclass
Val	13	QEI_07_10432101	7	108	LOC_Os07g17820	transposon protein, putative, unclassified
Val	13	QEI_07_10432101	7	112	LOC_Os07g17830	retrotransposon protein, putative, unclassified
Val	13	QEI_07_10432101	7	114	LOC_Os07g17840	transposon protein, putative, unclassified
Val	14	QEI_07_18015469	7	-111	LOC_Os07g30280	csAtPR5, putative, expressed
Val	14	QEI_07_18015469	7	-104	LOC_Os07g30300	small G protein family protein, putative, expressed
Val	14	QEI_07_18015469	7	-91	LOC_Os07g30310	retrotransposon protein, putative, Ty3-gypsy subclass
Val	14	QEI_07_18015469	7	-75	LOC_Os07g30320	retrotransposon protein, putative, Ty3-gypsy subclass
Val	14	QEI_07_18015469	7	-69	LOC_Os07g30330	cytokinin-O-glucosyltransferase 2, putative, expressed
Val	14	QEI_07_18015469	7	-59	LOC_Os07g30340	retrotransposon protein, putative, unclassified
Val	14	QEI_07_18015469	7	-51	LOC_Os07g30350	retrotransposon protein, putative, unclassified
Val	14	QEI_07_18015469	7	-45	LOC_Os07g30360	retrotransposon protein, putative, unclassified
Val	14	QEI_07_18015469	7	-40	LOC_Os07g30369	indole-3-acetate beta-glucosyltransferase, putative, expressed
Val	14	QEI_07_18015469	7	-36	LOC_Os07g30380	transposon protein, putative, unclassified
Val	14	QEI_07_18015469	7	-35	LOC_Os07g30394	hypothetical protein
Val	14	QEI_07_18015469	7	-24	LOC_Os07g30410	TKL_IRAK_DUF26-la.2 - DUF26 kinases have homology to DUF26 containing loci
Val	14	QEI_07_18015469	7	-10	LOC_Os07g30420	hypothetical protein
Val	14	QEI_07_18015469	7	0	LOC_Os07g30430	retrotransposon protein, putative, Ty3-gypsy subclass
Val	14	QEI_07_18015469	7	7	LOC_Os07g30450	hypothetical protein
Val	14	QEI_07_18015469	7	9	LOC_Os07g30460	retrotransposon protein, putative, unclassified
Val	14	QEI_07_18015469	7	16	LOC_Os07g30469	indole-3-acetate beta-glucosyltransferase, putative
Val	14	QEI_07_18015469	7	19	LOC_Os07g30480	transposon protein, putative, unclassified
Val	14	QEI_07_18015469	7	23	LOC_Os07g30494	hypothetical protein
Val	14	QEI_07_18015469	7	30	LOC_Os07g30510	TKL_IRAK_DUF26-la.3 - DUF26 kinases have homology to DUF26 containing loci
Val	14	QEI_07_18015469	7	39	LOC_Os07g30520	hypothetical protein
Val	14	QEI_07_18015469	7	44	LOC_Os07g30530	transposon protein, putative, CACTA, En/Spm sub-class
Val	14	QEI_07_18015469	7	48	LOC_Os07g30540	variant latency associated nuclear antigen, putative
Val	14	QEI_07_18015469	7	52	LOC_Os07g30550	transposon protein, putative, CACTA, En/Spm sub-class
Val	14	QEI_07_18015469	7	59	LOC_Os07g30560	retrotransposon protein, putative, Ty3-gypsy subclass
Val	14	QEI_07_18015469	7	72	LOC_Os07g30570	retrotransposon protein, putative, Ty3-gypsy subclass
Val	14	QEI_07_18015469	7	76	LOC_Os07g30580	retrotransposon protein, putative, Ty3-gypsy subclass, expressed
Val	14	QEI_07_18015469	7	86	LOC_Os07g30590	LTPL55 - Protease inhibitor/seed storage/LTP family protein precursor, putative, expressed
Val	14	QEI_07_18015469	7	89	LOC_Os07g30600	male sterility protein, putative
Val	14	QEI_07_18015469	7	97	LOC_Os07g30610	cytokinin-O-glucosyltransferase 2, putative, expressed
Val	14	QEI_07_18015469	7	108	LOC_Os07g30620	cytokinin-O-glucosyltransferase 2, putative, expressed
Val	14	QEI_07_18015469	7	112	LOC_Os07g30630	hypothetical protein
Val	14	QEI_07_18015469	7	116	LOC_Os07g30640	ubiquitin fusion protein, putative, expressed
Val	15	QEI_09_04669772	9	-101	LOC_Os09g08670	protein of unknown function DUF1296 domain containing protein, expressed
Val	15	QEI_09_04669772	9	-101	LOC_Os09g08690	hypothetical protein
Val	15	QEI_09_04669772	9	-98	LOC_Os09g08700	hypothetical protein
Val	15	QEI_09_04669772	9	-90	LOC_Os09g08710	expressed protein
Val	15	QEI_09_04669772	9	-75	LOC_Os09g08720	cinnamoyl CoA reductase, putative, expressed
Val	15	QEI_09_04669772	9	-65	LOC_Os09g08730	pumilio domain-containing protein, putative
Val	15	QEI_09_04669772	9	-60	LOC_Os09g08740	retrotransposon protein, putative, Ty3-gypsy subclass
Val	15	QEI_09_04669772	9	-55	LOC_Os09g08750	retrotransposon protein, putative, Ty3-gypsy subclass
Val	15	QEI_09_04669772	9	-47	LOC_Os09g08760	hypothetical protein
Val	15	QEI_09_04669772	9	-41	LOC_Os09g08770	hypothetical protein
Val	15	QEI_09_04669772	9	-36	LOC_Os09g08780	transposon protein, putative, CACTA, En/Spm sub-class
Val	15	QEI_09_04669772	9	-30	LOC_Os09g08790	transposon protein, putative, CACTA, En/Spm sub-class
Val	15	QEI_09_04669772	9	-23	LOC_Os09g08810	retrotransposon protein, putative, unclassified
Val	15	QEI_09_04669772	9	-18	LOC_Os09g08820	transposon protein, putative, CACTA, En/Spm sub-class
Val	15	QEI_09_04669772	9	-12	LOC_Os09g08830	transposon protein, putative, CACTA, En/Spm sub-class
Val	15	QEI_09_04669772	9	-9	LOC_Os09g08840	conserved hypothetical protein
Val	15	QEI_09_04669772	9	10	LOC_Os09g08860	retrotransposon protein, putative, Ty3-gypsy subclass
Val	15	QEI_09_04669772	9	13	LOC_Os09g08870	retrotransposon protein, putative, Ty3-gypsy subclass
Val	15	QEI_09_04669772	9	21	LOC_Os09g08880	ATP synthase like protein, putative
Val	15	QEI_09_04669772	9	33	LOC_Os09g08890	mitochondrial 60S ribosomal protein L5, putative, expressed
Val	15	QEI_09_04669772	9	44	LOC_Os09g08900	retrotransposon protein, putative, Ty3-gypsy subclass, expressed
Val	15	QEI_09_04669772	9	54	LOC_Os09g08910	ATP synthase, putative, expressed
Val	15	QEI_09_04669772	9	66	LOC_Os09g08920	cytochrome P450, putative, expressed
Val	15	QEI_09_04669772	9	77	LOC_Os09g08930	transposon protein, putative, CACTA, En/Spm sub-class
Val	15	QEI_09_04669772	9	82	LOC_Os09g08940	transposon protein, putative, CACTA, En/Spm sub-class
Val	15	QEI_09_04669772	9	87	LOC_Os09g08950	hypothetical protein
Val	15	QEI_09_04669772	9	91	LOC_Os09g08960	retrotransposon protein, putative, unclassified
Val	15	QEI_09_04669772	9	100	LOC_Os09g08970	hypothetical protein
Val	15	QEI_09_04669772	9	104	LOC_Os09g08980	retrotransposon protein, putative, unclassified
Val	15	QEI_09_04669772	9	104	LOC_Os09g08990	cytochrome P450, putative, expressed
Val	16	QEI_09_09052420	9	-106	LOC_Os09g14930	retrotransposon protein, putative, Ty1-copia subclass
Val	16	QEI_09_09052420	9	-105	LOC_Os09g14940	retrotransposon protein, putative, Ty1-copia subclass
Val	16	QEI_09_09052420	9	-87	LOC_Os09g14950	conserved hypothetical protein
Val	16	QEI_09_09052420	9	-79	LOC_Os09g14960	transposon protein, putative, Pong sub-class, expressed
Val	16	QEI_09_09052420	9	-72	LOC_Os09g14970	hypothetical protein
Val	16	QEI_09_09052420	9	-59	LOC_Os09g14980	retrotransposon protein, putative, Ty3-gypsy subclass
Val	16	QEI_09_09052420	9	-55	LOC_Os09g14990	retrotransposon protein, putative, Ty1-copia subclass
Val	16	QEI_09_09052420	9	-18	LOC_Os09g15000	retrotransposon protein, putative, unclassified
Val	16	QEI_09_09052420	9	-12	LOC_Os09g15010	retrotransposon protein, putative, unclassified
Val	16	QEI_09_09052420	9	0	LOC_Os09g15020	retrotransposon protein, putative, unclassified
Val	16	QEI_09_09052420	9	12	LOC_Os09g15030	retrotransposon protein, putative, Ty1-copia subclass
Val	16	QEI_09_09052420	9	20	LOC_Os09g15040	hypothetical protein
Val	16	QEI_09_09052420	9	34	LOC_Os09g15044	expressed protein
Val	16	QEI_09_09052420	9	43	LOC_Os09g15050	ent-kaurene synthase A, chloroplast precursor, putative, expressed
Val	16	QEI_09_09052420	9	52	LOC_Os09g15060	hypothetical protein
Val	16	QEI_09_09052420	9	67	LOC_Os09g15070	hypothetical protein
Val	16	QEI_09_09052420	9	73	LOC_Os09g15080	retrotransposon protein, putative, unclassified
Val	16	QEI_09_09052420	9	93	LOC_Os09g15090	transposon protein, putative, CACTA, En/Spm sub-class
Val	16	QEI_09_09052420	9	99	LOC_Os09g15100	retrotransposon protein, putative, unclassified
Val	16	QEI_09_09052420	9	103	LOC_Os09g15110	hypothetical protein
Val	17	QEI_10_11567790	10	-118	LOC_Os10g22260	retrotransposon protein, putative, unclassified
Val	17	QEI_10_11567790	10	-115	LOC_Os10g22270	hypothetical protein
Val	17	QEI_10_11567790	10	-110	LOC_Os10g22290	NBS-LRR disease resistance protein, putative
Val	17	QEI_10_11567790	10	-103	LOC_Os10g22300	resistance protein, putative, expressed
Val	17	QEI_10_11567790	10	-96	LOC_Os10g22310	glutathione S-transferase GST 26, putative, expressed
Val	17	QEI_10_11567790	10	-92	LOC_Os10g22330	clathrin adaptor complex small chain domain containing protein, expressed
Val	17	QEI_10_11567790	10	-89	LOC_Os10g22340	transposon protein, putative, CACTA, En/Spm sub-class
Val	17	QEI_10_11567790	10	-77	LOC_Os10g22350	hypothetical protein
Val	17	QEI_10_11567790	10	-71	LOC_Os10g22356	expressed protein
Val	17	QEI_10_11567790	10	-70	LOC_Os10g22362	hypothetical protein
Val	17	QEI_10_11567790	10	-62	LOC_Os10g22370	retrotransposon protein, putative, unclassified
Val	17	QEI_10_11567790	10	-53	LOC_Os10g22380	glutamyl-tRNA synthetase, cytoplasmic, putative, expressed
Val	17	QEI_10_11567790	10	-43	LOC_Os10g22394	retrotransposon protein, putative, unclassified
Val	17	QEI_10_11567790	10	-39	LOC_Os10g22410	yippee zinc-binding protein, putative, expressed
Val	17	QEI_10_11567790	10	-29	LOC_Os10g22430	gibberellin response modulator protein, putative, expressed
Val	17	QEI_10_11567790	10	-21	LOC_Os10g22440	hypothetical protein
Val	17	QEI_10_11567790	10	-9	LOC_Os10g22450	inositol-3-phosphate synthase, putative, expressed
Val	17	QEI_10_11567790	10	-4	LOC_Os10g22460	expressed protein
Val	17	QEI_10_11567790	10	10	LOC_Os10g22484	RGH2B, putative, expressed
Val	17	QEI_10_11567790	10	23	LOC_Os10g22510	MLA1, putative, expressed
Val	17	QEI_10_11567790	10	27	LOC_Os10g22520	cellulase, putative, expressed
Val	17	QEI_10_11567790	10	39	LOC_Os10g22540	retrotransposon protein, putative, unclassified
Val	17	QEI_10_11567790	10	43	LOC_Os10g22550	retrotransposon protein, putative, unclassified
Val	17	QEI_10_11567790	10	52	LOC_Os10g22560	peptide transporter PTR2, putative, expressed
Val	17	QEI_10_11567790	10	60	LOC_Os10g22570	cellulase, putative, expressed
Val	17	QEI_10_11567790	10	77	LOC_Os10g22580	hypothetical protein
Val	17	QEI_10_11567790	10	84	LOC_Os10g22590	POEI24 - Pollen Ole e I allergen and extensin family protein precursor, expressed
Val	17	QEI_10_11567790	10	92	LOC_Os10g22600	ethylene-responsive transcription factor, putative, expressed
Val	17	QEI_10_11567790	10	103	LOC_Os10g22610	conserved hypothetical protein
Val	17	QEI_10_11567790	10	108	LOC_Os10g22620	retrotransposon protein, putative, unclassified
Val	17	QEI_10_11567790	10	119	LOC_Os10g22630	expressed protein
Val	18	QEI_11_06000883	11	-113	LOC_Os11g10720	Cf2/Cf5 disease resistance protein, putative
Val	18	QEI_11_06000883	11	-110	LOC_Os11g10730	retrotransposon protein, putative, unclassified, expressed
Val	18	QEI_11_06000883	11	-108	LOC_Os11g10740	tetratricopeptide-like helical, putative
Val	18	QEI_11_06000883	11	-102	LOC_Os11g10750	OsSCP48 - Putative Serine Carboxypeptidase homologue, expressed
Val	18	QEI_11_06000883	11	-93	LOC_Os11g10760	NBS-LRR disease resistance protein, putative, expressed
Val	18	QEI_11_06000883	11	-86	LOC_Os11g10770	disease resistance protein RGA3, putative, expressed
Val	18	QEI_11_06000883	11	-81	LOC_Os11g10780	expressed protein
Val	18	QEI_11_06000883	11	-67	LOC_Os11g10790	conserved hypothetical protein
Val	18	QEI_11_06000883	11	-56	LOC_Os11g10800	dirigent, putative, expressed
Val	18	QEI_11_06000883	11	-52	LOC_Os11g10810	retrotransposon protein, putative, unclassified
Val	18	QEI_11_06000883	11	-35	LOC_Os11g10820	retrotransposon protein, putative, Ty3-gypsy subclass
Val	18	QEI_11_06000883	11	-32	LOC_Os11g10830	retrotransposon protein, putative, unclassified
Val	18	QEI_11_06000883	11	-30	LOC_Os11g10840	conserved hypothetical protein
Val	18	QEI_11_06000883	11	-26	LOC_Os11g10850	dirigent, putative
Val	18	QEI_11_06000883	11	-14	LOC_Os11g10860	transposon protein, putative, CACTA, En/Spm sub-class
Val	18	QEI_11_06000883	11	-7	LOC_Os11g10870	dirigent, putative, expressed
Val	18	QEI_11_06000883	11	-5	LOC_Os11g10880	hypothetical protein
Val	18	QEI_11_06000883	11	-2	LOC_Os11g10890	expressed protein
Val	18	QEI_11_06000883	11	5	LOC_Os11g10900	retrotransposon protein, putative, Ty3-gypsy subclass
Val	18	QEI_11_06000883	11	15	LOC_Os11g10910	chloroplast nucleoid DNA-binding protein, putative, expressed
Val	18	QEI_11_06000883	11	25	LOC_Os11g10920	carboxyl-terminal proteinase, putative, expressed
Val	18	QEI_11_06000883	11	30	LOC_Os11g10930	hypothetical protein
Val	18	QEI_11_06000883	11	34	LOC_Os11g10940	hypothetical protein
Val	18	QEI_11_06000883	11	39	LOC_Os11g10950	retrotransposon protein, putative, unclassified
Val	18	QEI_11_06000883	11	43	LOC_Os11g10960	retrotransposon protein, putative, Ty3-gypsy subclass
Val	18	QEI_11_06000883	11	45	LOC_Os11g10970	retrotransposon protein, putative, Ty3-gypsy subclass
Val	18	QEI_11_06000883	11	54	LOC_Os11g10980	pyruvate kinase, putative, expressed
Val	18	QEI_11_06000883	11	59	LOC_Os11g10990	heat shock protein DnaJ, putative, expressed
Val	18	QEI_11_06000883	11	63	LOC_Os11g11000	ELMO/CED-12 family protein, putative, expressed
Val	18	QEI_11_06000883	11	70	LOC_Os11g11010	retrotransposon protein, putative, unclassified
Val	18	QEI_11_06000883	11	82	LOC_Os11g11020	DAG protein, chloroplast precursor, putative, expressed
Val	18	QEI_11_06000883	11	87	LOC_Os11g11030	conserved hypothetical protein
Val	18	QEI_11_06000883	11	88	LOC_Os11g11040	hypothetical protein
Val	18	QEI_11_06000883	11	96	LOC_Os11g11050	initiation factor 2 subunit family domain containing protein, expressed
Val	18	QEI_11_06000883	11	105	LOC_Os11g11060	GHMP kinases ATP-binding protein, putative, expressed
Val	19	QEI_11_08096193	11	-121	LOC_Os11g14250	hypothetical protein
Val	19	QEI_11_08096193	11	-112	LOC_Os11g14260	conserved hypothetical protein
Val	19	QEI_11_08096193	11	-106	LOC_Os11g14270	transposon protein, putative, unclassified
Val	19	QEI_11_08096193	11	-97	LOC_Os11g14280	transposon protein, putative, unclassified
Val	19	QEI_11_08096193	11	-82	LOC_Os11g14290	hypothetical protein
Val	19	QEI_11_08096193	11	-73	LOC_Os11g14300	la domain containing protein, expressed
Val	19	QEI_11_08096193	11	-67	LOC_Os11g14310	hypothetical protein
Val	19	QEI_11_08096193	11	-63	LOC_Os11g14320	hypothetical protein
Val	19	QEI_11_08096193	11	-54	LOC_Os11g14330	retrotransposon protein, putative, unclassified
Val	19	QEI_11_08096193	11	-46	LOC_Os11g14340	transposon protein, putative, CACTA, En/Spm sub-class
Val	19	QEI_11_08096193	11	-39	LOC_Os11g14350	transposon protein, putative, CACTA, En/Spm sub-class
Val	19	QEI_11_08096193	11	-35	LOC_Os11g14360	retrotransposon, putative, centromere-specific
Val	19	QEI_11_08096193	11	-29	LOC_Os11g14370	hypothetical protein
Val	19	QEI_11_08096193	11	-22	LOC_Os11g14380	resistance protein LR10, putative, expressed
Val	19	QEI_11_08096193	11	-15	LOC_Os11g14390	expressed protein
Val	19	QEI_11_08096193	11	-13	LOC_Os11g14400	polygalacturonase, putative, expressed
Val	19	QEI_11_08096193	11	-8	LOC_Os11g14410	polygalacturonase, putative, expressed
Val	19	QEI_11_08096193	11	0	LOC_Os11g14420	inactive receptor kinase At1g27190 precursor, putative, expressed
Val	19	QEI_11_08096193	11	0	LOC_Os11g14430	APOBEC1 complementation factor, putative, expressed
Val	19	QEI_11_08096193	11	5	LOC_Os11g14440	expressed protein
Val	19	QEI_11_08096193	11	11	LOC_Os11g14450	retrotransposon protein, putative, unclassified
Val	19	QEI_11_08096193	11	14	LOC_Os11g14460	retrotransposon protein, putative, Ty3-gypsy subclass
Val	19	QEI_11_08096193	11	29	LOC_Os11g14470	transposon protein, putative, unclassified
Val	19	QEI_11_08096193	11	31	LOC_Os11g14480	conserved hypothetical protein
Val	19	QEI_11_08096193	11	39	LOC_Os11g14490	conserved hypothetical protein
Val	19	QEI_11_08096193	11	42	LOC_Os11g14500	hypothetical protein
Val	19	QEI_11_08096193	11	45	LOC_Os11g14510	transposon protein, putative, unclassified
Val	19	QEI_11_08096193	11	54	LOC_Os11g14520	conserved hypothetical protein
Val	19	QEI_11_08096193	11	58	LOC_Os11g14525	expressed protein
Val	19	QEI_11_08096193	11	60	LOC_Os11g14530	hypothetical protein
Val	19	QEI_11_08096193	11	62	LOC_Os11g14544	expressed protein
Val	19	QEI_11_08096193	11	75	LOC_Os11g14560	transposon protein, putative, CACTA, En/Spm sub-class
Val	19	QEI_11_08096193	11	96	LOC_Os11g14570	expressed protein
Val	19	QEI_11_08096193	11	103	LOC_Os11g14580	retrotransposon protein, putative, Ty3-gypsy subclass
Val	19	QEI_11_08096193	11	113	LOC_Os11g14590	hypothetical protein
Val	20	QEI_11_26137605	11	-116	LOC_Os11g43860	sodium/calcium exchanger protein, putative, expressed
Val	20	QEI_11_26137605	11	-113	LOC_Os11g43870	transposon protein, putative, unclassified
Val	20	QEI_11_26137605	11	-111	LOC_Os11g43880	retrotransposon protein, putative, Ty3-gypsy subclass
Val	20	QEI_11_26137605	11	-104	LOC_Os11g43890	WD domain, G-beta repeat domain containing protein, expressed
Val	20	QEI_11_26137605	11	-101	LOC_Os11g43895	expressed protein
Val	20	QEI_11_26137605	11	-96	LOC_Os11g43900	translationally-controlled tumor protein, putative, expressed
Val	20	QEI_11_26137605	11	-94	LOC_Os11g43910	hypothetical protein
Val	20	QEI_11_26137605	11	-91	LOC_Os11g43914	expressed protein
Val	20	QEI_11_26137605	11	-90	LOC_Os11g43920	hypothetical protein
Val	20	QEI_11_26137605	11	-78	LOC_Os11g43934	pentatricopeptide, putative, expressed
Val	20	QEI_11_26137605	11	-59	LOC_Os11g43950	dnaJ domain containing protein, expressed
Val	20	QEI_11_26137605	11	-56	LOC_Os11g43960	mitochondrial carrier protein, putative, expressed
Val	20	QEI_11_26137605	11	-45	LOC_Os11g43970	AAA-type ATPase family protein, putative, expressed
Val	20	QEI_11_26137605	11	-35	LOC_Os11g43980	peroxidase precursor, putative, expressed
Val	20	QEI_11_26137605	11	-27	LOC_Os11g43990	expressed protein
Val	20	QEI_11_26137605	11	-22	LOC_Os11g44000	hypothetical protein
Val	20	QEI_11_26137605	11	-9	LOC_Os11g44014	retrotransposon protein, putative, unclassified
Val	20	QEI_11_26137605	11	3	LOC_Os11g44030	expressed protein
Val	20	QEI_11_26137605	11	8	LOC_Os11g44040	hypothetical protein
Val	20	QEI_11_26137605	11	14	LOC_Os11g44050	retrotransposon protein, putative, Ty3-gypsy subclass
Val	20	QEI_11_26137605	11	17	LOC_Os11g44060	retrotransposon protein, putative, Ty3-gypsy subclass
Val	20	QEI_11_26137605	11	20	LOC_Os11g44070	retrotransposon protein, putative, Ty3-gypsy subclass
Val	20	QEI_11_26137605	11	25	LOC_Os11g44084	transposon protein, putative, CACTA, En/Spm sub-class
Val	20	QEI_11_26137605	11	29	LOC_Os11g44100	transposon protein, putative, CACTA, En/Spm sub-class
Val	20	QEI_11_26137605	11	32	LOC_Os11g44110	hypothetical protein
Val	20	QEI_11_26137605	11	34	LOC_Os11g44120	hypothetical protein
Val	20	QEI_11_26137605	11	36	LOC_Os11g44130	retrotransposon protein, putative, unclassified
Val	20	QEI_11_26137605	11	40	LOC_Os11g44140	retrotransposon protein, putative, Ty3-gypsy subclass
Val	20	QEI_11_26137605	11	42	LOC_Os11g44150	retrotransposon protein, putative, Ty3-gypsy subclass
Val	20	QEI_11_26137605	11	64	LOC_Os11g44160	transposon protein, putative, CACTA, En/Spm sub-class
Val	20	QEI_11_26137605	11	73	LOC_Os11g44170	calmodulin binding protein, putative, expressed
Val	20	QEI_11_26137605	11	76	LOC_Os11g44180	transposon protein, putative, unclassified
Val	20	QEI_11_26137605	11	80	LOC_Os11g44190	retrotransposon protein, putative, unclassified
Val	20	QEI_11_26137605	11	87	LOC_Os11g44200	hypothetical protein
Val	20	QEI_11_26137605	11	89	LOC_Os11g44210	transposon protein, putative, unclassified
Val	20	QEI_11_26137605	11	105	LOC_Os11g44220	retrotransposon protein, putative, Ty3-gypsy subclass
Val	20	QEI_11_26137605	11	114	LOC_Os11g44230	hypothetical protein
Val	21	QEI_12_08037829	12	-119	LOC_Os12g13940	DNA-binding storekeeper protein-related, putative, expressed
Val	21	QEI_12_08037829	12	-113	LOC_Os12g13950	POLA2 - Putative DNA polymerase alpha complex subunit, expressed
Val	22	QEI_12_08037830	12	-104	LOC_Os12g13960	LTPL33 - Protease inhibitor/seed storage/LTP family protein precursor
Val	23	QEI_12_08037831	12	-98	LOC_Os12g13980	conserved hypothetical protein
Val	24	QEI_12_08037832	12	-84	LOC_Os12g13990	retrotransposon protein, putative, Ty3-gypsy subclass
Val	25	QEI_12_08037833	12	-81	LOC_Os12g14000	retrotransposon protein, putative, Ty3-gypsy subclass
Val	26	QEI_12_08037834	12	-77	LOC_Os12g14010	retrotransposon protein, putative, unclassified
Val	27	QEI_12_08037835	12	-74	LOC_Os12g14020	retrotransposon protein, putative, Ty3-gypsy subclass
Val	28	QEI_12_08037836	12	-71	LOC_Os12g14030	hypothetical protein
Val	29	QEI_12_08037837	12	-68	LOC_Os12g14040	retrotransposon protein, putative, Ty3-gypsy subclass
Val	30	QEI_12_08037838	12	-64	LOC_Os12g14050	retrotransposon protein, putative, Ty3-gypsy subclass
Val	31	QEI_12_08037839	12	-57	LOC_Os12g14059	expressed protein
Val	32	QEI_12_08037840	12	-48	LOC_Os12g14070	DnaK family protein, putative, expressed
Val	33	QEI_12_08037841	12	-45	LOC_Os12g14080	expressed protein
Val	34	QEI_12_08037842	12	-43	LOC_Os12g14090	hypothetical protein
Val	35	QEI_12_08037843	12	-40	LOC_Os12g14100	amino acid transporter, putative, expressed
Val	36	QEI_12_08037844	12	-35	LOC_Os12g14110	expressed protein
Val	37	QEI_12_08037845	12	-24	LOC_Os12g14120	retrotransposon protein, putative, Ty1-copia subclass
Val	38	QEI_12_08037846	12	-20	LOC_Os12g14126	retrotransposon protein, putative, Ty1-copia subclass, expressed
Val	39	QEI_12_08037847	12	-15	LOC_Os12g14132	hypothetical protein
Val	40	QEI_12_08037848	12	-13	LOC_Os12g14140	expressed protein
Val	41	QEI_12_08037849	12	-3	LOC_Os12g14150	expressed protein
Val	42	QEI_12_08037850	12	0	LOC_Os12g14160	hypothetical protein
Val	43	QEI_12_08037851	12	4	LOC_Os12g14170	transposon protein, putative, CACTA, En/Spm sub-class
Val	44	QEI_12_08037852	12	10	LOC_Os12g14180	transposon protein, putative, CACTA, En/Spm sub-class
Val	45	QEI_12_08037853	12	19	LOC_Os12g14190	transposon protein, putative, CACTA, En/Spm sub-class
Val	46	QEI_12_08037854	12	24	LOC_Os12g14200	transposon protein, putative, CACTA, En/Spm sub-class
Val	47	QEI_12_08037855	12	33	LOC_Os12g14210	hypothetical protein
Val	48	QEI_12_08037856	12	35	LOC_Os12g14220	expressed protein
Val	49	QEI_12_08037857	12	38	LOC_Os12g14224	expressed protein
Val	50	QEI_12_08037858	12	43	LOC_Os12g14230	hypothetical protein
Val	51	QEI_12_08037859	12	53	LOC_Os12g14240	retrotransposon protein, putative, Ty3-gypsy subclass
Val	52	QEI_12_08037860	12	57	LOC_Os12g14250	retrotransposon protein, putative, unclassified
Val	53	QEI_12_08037861	12	74	LOC_Os12g14260	retrotransposon protein, putative, Ty3-gypsy subclass
Val	54	QEI_12_08037862	12	81	LOC_Os12g14270	retrotransposon protein, putative, unclassified
Val	55	QEI_12_08037863	12	93	LOC_Os12g14280	retrotransposon protein, putative, Ty3-gypsy subclass
Val	56	QEI_12_08037864	12	97	LOC_Os12g14290	retrotransposon protein, putative, Ty3-gypsy subclass
Val	57	QEI_12_08037865	12	113	LOC_Os12g14310	hypothetical protein
Val	58	QEI_12_08037866	12	115	LOC_Os12g14320	hypothetical protein
Val	22	QEI_12_14228913	12	-108	LOC_Os12g24659	hypothetical protein
Val	22	QEI_12_14228913	12	-106	LOC_Os12g24670	hypothetical protein
Val	22	QEI_12_14228913	12	-93	LOC_Os12g24680	transposon protein, putative, CACTA, En/Spm sub-class
Val	22	QEI_12_14228913	12	-78	LOC_Os12g24690	retrotransposon protein, putative, Ty1-copia subclass
Val	22	QEI_12_14228913	12	-77	LOC_Os12g24700	retrotransposon protein, putative, Ty1-copia subclass
Val	22	QEI_12_14228913	12	-59	LOC_Os12g24710	retrotransposon protein, putative, unclassified
Val	22	QEI_12_14228913	12	-43	LOC_Os12g24730	retrotransposon protein, putative, unclassified
Val	22	QEI_12_14228913	12	-36	LOC_Os12g24740	retrotransposon protein, putative, unclassified
Val	22	QEI_12_14228913	12	-29	LOC_Os12g24750	retrotransposon protein, putative, Ty3-gypsy subclass
Val	22	QEI_12_14228913	12	-25	LOC_Os12g24760	retrotransposon protein, putative, Ty3-gypsy subclass
Val	22	QEI_12_14228913	12	-22	LOC_Os12g24770	retrotransposon protein, putative, unclassified
Val	22	QEI_12_14228913	12	-15	LOC_Os12g24780	retrotransposon protein, putative, unclassified
Val	22	QEI_12_14228913	12	-10	LOC_Os12g24790	retrotransposon protein, putative, LINE subclass, expressed
Val	22	QEI_12_14228913	12	1	LOC_Os12g24800	9-cis-epoxycarotenoid dioxygenase 1, chloroplast precursor, putative, expressed
Val	22	QEI_12_14228913	12	10	LOC_Os12g24810	conserved hypothetical protein
Val	22	QEI_12_14228913	12	12	LOC_Os12g24820	retrotransposon protein, putative, Ty3-gypsy subclass
Val	22	QEI_12_14228913	12	16	LOC_Os12g24830	retrotransposon protein, putative, Ty3-gypsy subclass
Val	22	QEI_12_14228913	12	19	LOC_Os12g24840	retrotransposon protein, putative, Ty3-gypsy subclass
Val	22	QEI_12_14228913	12	22	LOC_Os12g24850	hypothetical protein
Val	22	QEI_12_14228913	12	27	LOC_Os12g24870	SWIM zinc finger family protein, putative
Val	22	QEI_12_14228913	12	30	LOC_Os12g24880	retrotransposon protein, putative, unclassified
Val	22	QEI_12_14228913	12	47	LOC_Os12g24890	retrotransposon protein, putative, Ty3-gypsy subclass
Val	22	QEI_12_14228913	12	50	LOC_Os12g24900	hypothetical protein
Val	22	QEI_12_14228913	12	68	LOC_Os12g24910	retrotransposon protein, putative, Ty3-gypsy subclass
Val	22	QEI_12_14228913	12	78	LOC_Os12g24920	retrotransposon, putative, centromere-specific
Val	22	QEI_12_14228913	12	87	LOC_Os12g24930	retrotransposon protein, putative, Ty3-gypsy subclass
Val	22	QEI_12_14228913	12	92	LOC_Os12g24940	retrotransposon protein, putative, unclassified
Val	22	QEI_12_14228913	12	93	LOC_Os12g24950	retrotransposon protein, putative, Ty3-gypsy subclass
Val	22	QEI_12_14228913	12	96	LOC_Os12g24960	retrotransposon protein, putative, Ty3-gypsy subclass
Val	22	QEI_12_14228913	12	102	LOC_Os12g24970	retrotransposon protein, putative, Ty3-gypsy subclass
Val	22	QEI_12_14228913	12	105	LOC_Os12g24980	hypothetical protein
Val	22	QEI_12_14228913	12	110	LOC_Os12g24990	retrotransposon protein, putative, Ty3-gypsy subclass
Val	23	QEI_12_17047868	12	-115	LOC_Os12g28650	retrotransposon protein, putative, Ty3-gypsy subclass
Val	23	QEI_12_17047868	12	-112	LOC_Os12g28659	retrotransposon protein, putative, unclassified
Val	23	QEI_12_17047868	12	-109	LOC_Os12g28670	retrotransposon protein, putative, unclassified
Val	23	QEI_12_17047868	12	-106	LOC_Os12g28679	retrotransposon protein, putative, unclassified
Val	23	QEI_12_17047868	12	-100	LOC_Os12g28690	retrotransposon protein, putative, Ty3-gypsy subclass
Val	23	QEI_12_17047868	12	-88	LOC_Os12g28710	ATPase 3, putative, expressed
Val	23	QEI_12_17047868	12	-82	LOC_Os12g28720	expressed protein
Val	23	QEI_12_17047868	12	-75	LOC_Os12g28730	transposon protein, putative, CACTA, En/Spm sub-class
Val	23	QEI_12_17047868	12	-69	LOC_Os12g28740	transposon protein, putative, CACTA, En/Spm sub-class
Val	23	QEI_12_17047868	12	-63	LOC_Os12g28750	TPD1, putative, expressed
Val	23	QEI_12_17047868	12	-54	LOC_Os12g28760	hypothetical protein
Val	23	QEI_12_17047868	12	-41	LOC_Os12g28770	POEI19 - Pollen Ole e I allergen and extensin family protein precursor, expressed
Val	23	QEI_12_17047868	12	-38	LOC_Os12g28780	hypothetical protein
Val	23	QEI_12_17047868	12	-31	LOC_Os12g28790	hypothetical protein
Val	23	QEI_12_17047868	12	-26	LOC_Os12g28800	transposon protein, putative, CACTA, En/Spm sub-class
Val	23	QEI_12_17047868	12	-18	LOC_Os12g28810	transposon protein, putative, CACTA, En/Spm sub-class
Val	23	QEI_12_17047868	12	-15	LOC_Os12g28820	conserved hypothetical protein
Val	23	QEI_12_17047868	12	-5	LOC_Os12g28830	retrotransposon protein, putative, unclassified
Val	23	QEI_12_17047868	12	-3	LOC_Os12g28840	retrotransposon protein, putative, unclassified
Val	23	QEI_12_17047868	12	9	LOC_Os12g28860	hypothetical protein
Val	23	QEI_12_17047868	12	10	LOC_Os12g28870	hypothetical protein
Val	23	QEI_12_17047868	12	16	LOC_Os12g28880	LTPL110 - Protease inhibitor/seed storage/LTP family protein precursor, putative, expressed
Val	23	QEI_12_17047868	12	25	LOC_Os12g28890	retrotransposon protein, putative, unclassified
Val	23	QEI_12_17047868	12	30	LOC_Os12g28900	retrotransposon protein, putative, unclassified
Val	23	QEI_12_17047868	12	35	LOC_Os12g28910	conserved hypothetical protein
Val	23	QEI_12_17047868	12	38	LOC_Os12g28920	retrotransposon protein, putative, Ty3-gypsy subclass
Val	23	QEI_12_17047868	12	50	LOC_Os12g28930	retrotransposon protein, putative, unclassified
Val	23	QEI_12_17047868	12	59	LOC_Os12g28940	retrotransposon protein, putative, unclassified
Val	23	QEI_12_17047868	12	65	LOC_Os12g28950	retrotransposon protein, putative, unclassified
Val	23	QEI_12_17047868	12	72	LOC_Os12g28960	retrotransposon protein, putative, unclassified
Val	23	QEI_12_17047868	12	80	LOC_Os12g28970	retrotransposon protein, putative, Ty3-gypsy subclass, expressed
Val	23	QEI_12_17047868	12	85	LOC_Os12g28980	retrotransposon protein, putative, Ty3-gypsy subclass
Val	23	QEI_12_17047868	12	91	LOC_Os12g28990	retrotransposon protein, putative, Ty3-gypsy subclass
Val	23	QEI_12_17047868	12	102	LOC_Os12g29000	retrotransposon protein, putative, Ty3-gypsy subclass
Val	23	QEI_12_17047868	12	106	LOC_Os12g29010	retrotransposon protein, putative, Ty3-gypsy subclass
Val	23	QEI_12_17047868	12	115	LOC_Os12g29020	retrotransposon protein, putative, Ty3-gypsy subclass, expressed
Leu	1	QEI_01_34820524	1	-99	LOC_Os01g60040	HEAT repeat family protein, putative, expressed
Leu	1	QEI_01_34820524	1	-86	LOC_Os01g60050	HEAT, putative
Leu	1	QEI_01_34820524	1	-77	LOC_Os01g60060	leucine-rich repeat family protein, putative, expressed
Leu	1	QEI_01_34820524	1	-75	LOC_Os01g60070	conserved hypothetical protein
Leu	1	QEI_01_34820524	1	-72	LOC_Os01g60080	monocopper oxidase, putative, expressed
Leu	1	QEI_01_34820524	1	-66	LOC_Os01g60090	retrotransposon protein, putative, unclassified
Leu	1	QEI_01_34820524	1	-63	LOC_Os01g60100	transposon protein, putative, unclassified
Leu	1	QEI_01_34820524	1	-49	LOC_Os01g60110	E2F-related protein, putative, expressed
Leu	1	QEI_01_34820524	1	-40	LOC_Os01g60120	transmembrane protein 56, putative, expressed
Leu	1	QEI_01_34820524	1	-35	LOC_Os01g60130	hypothetical protein
Leu	1	QEI_01_34820524	1	-29	LOC_Os01g60140	ATCHX15, putative, expressed
Leu	1	QEI_01_34820524	1	-24	LOC_Os01g60150	hypothetical protein
Leu	1	QEI_01_34820524	1	-20	LOC_Os01g60160	hypothetical protein
Leu	1	QEI_01_34820524	1	-19	LOC_Os01g60170	DUF567 domain containing protein, putative, expressed
Leu	1	QEI_01_34820524	1	-17	LOC_Os01g60180	hypothetical protein
Leu	1	QEI_01_34820524	1	-13	LOC_Os01g60190	2,3-bisphosphoglycerate-independent phosphoglycerate mutase, putative, expressed
Leu	1	QEI_01_34820524	1	-9	LOC_Os01g60200	expressed protein
Leu	1	QEI_01_34820524	1	1	LOC_Os01g60210	transposon protein, putative, unclassified
Leu	1	QEI_01_34820524	1	2	LOC_Os01g60220	transposon protein, putative, unclassified
Leu	1	QEI_01_34820524	1	12	LOC_Os01g60230	auxin efflux carrier component, putative, expressed
Leu	1	QEI_01_34820524	1	20	LOC_Os01g60250	pentatricopeptide, putative, expressed
Leu	1	QEI_01_34820524	1	30	LOC_Os01g60260	KH domain containing protein, putative, expressed
Leu	1	QEI_01_34820524	1	40	LOC_Os01g60270	homeobox domain containing protein, expressed
Leu	1	QEI_01_34820524	1	46	LOC_Os01g60280	ATP binding protein, putative, expressed
Leu	1	QEI_01_34820524	1	63	LOC_Os01g60290	expressed protein
Leu	1	QEI_01_34820524	1	66	LOC_Os01g60309	retrotransposon protein, putative, Ty1-copia subclass
Leu	1	QEI_01_34820524	1	77	LOC_Os01g60330	inactive receptor kinase At2g26730 precursor, putative, expressed
Leu	1	QEI_01_34820524	1	80	LOC_Os01g60340	NTMC2Type1.1 protein, putative
Leu	1	QEI_01_34820524	1	86	LOC_Os01g60350	hypothetical protein
Leu	1	QEI_01_34820524	1	96	LOC_Os01g60360	ubiquitin-conjugating enzyme, putative
Leu	1	QEI_01_34820524	1	99	LOC_Os01g60369	retrotransposon protein, putative, Ty3-gypsy subclass
Leu	1	QEI_01_34820524	1	103	LOC_Os01g60380	retrotransposon protein, putative, Ty3-gypsy subclass
Leu	1	QEI_01_34820524	1	108	LOC_Os01g60389	retrotransposon protein, putative, Ty3-gypsy subclass
Leu	1	QEI_01_34820524	1	112	LOC_Os01g60400	retrotransposon protein, putative, Ty3-gypsy subclass
Leu	1	QEI_01_34820524	1	116	LOC_Os01g60410	ubiquitin-conjugating enzyme, putative, expressed
Leu	2	QEI_02_08224395	2	-115	LOC_Os02g14700	conserved hypothetical protein
Leu	2	QEI_02_08224395	2	-110	LOC_Os02g14710	expressed protein
Leu	2	QEI_02_08224395	2	-102	LOC_Os02g14720	expressed protein
Leu	2	QEI_02_08224395	2	-80	LOC_Os02g14730	ubiquitin carboxyl-terminal hydrolase family protein, expressed
Leu	2	QEI_02_08224395	2	-72	LOC_Os02g14740	hypothetical protein
Leu	2	QEI_02_08224395	2	-65	LOC_Os02g14750	hypothetical protein
Leu	2	QEI_02_08224395	2	-55	LOC_Os02g14760	CID11, putative, expressed
Leu	2	QEI_02_08224395	2	-40	LOC_Os02g14770	phosphoenolpyruvate carboxylase, putative, expressed
Leu	2	QEI_02_08224395	2	-24	LOC_Os02g14780	splicing factor 3 subunit 1, putative, expressed
Leu	2	QEI_02_08224395	2	-18	LOC_Os02g14790	WD domain, G-beta repeat domain containing protein, expressed
Leu	2	QEI_02_08224395	2	-1	LOC_Os02g14800	expressed protein
Leu	2	QEI_02_08224395	2	3	LOC_Os02g14810	conserved hypothetical protein
Leu	2	QEI_02_08224395	2	9	LOC_Os02g14820	hypothetical protein
Leu	2	QEI_02_08224395	2	16	LOC_Os02g14830	hypothetical protein
Leu	2	QEI_02_08224395	2	19	LOC_Os02g14840	potassium channel KAT1, putative, expressed
Leu	2	QEI_02_08224395	2	32	LOC_Os02g14850	expressed protein
Leu	2	QEI_02_08224395	2	36	LOC_Os02g14855	conserved hypothetical protein
Leu	2	QEI_02_08224395	2	38	LOC_Os02g14860	prefoldin subunit, putative, expressed
Leu	2	QEI_02_08224395	2	43	LOC_Os02g14870	conserved hypothetical protein
Leu	2	QEI_02_08224395	2	52	LOC_Os02g14874	expressed protein
Leu	2	QEI_02_08224395	2	64	LOC_Os02g14880	hypothetical protein
Leu	2	QEI_02_08224395	2	68	LOC_Os02g14890	expressed protein
Leu	2	QEI_02_08224395	2	75	LOC_Os02g14900	1,3-beta-glucan synthase component domain containing protein, expressed
Leu	2	QEI_02_08224395	2	99	LOC_Os02g14910	bZIP transcription factor family protein, putative, expressed
Leu	2	QEI_02_08224395	2	101	LOC_Os02g14929	T-complex protein, putative, expressed
Leu	3	QEI_04_03199708	4	-120	LOC_Os04g05950	hypothetical protein
Leu	3	QEI_04_03199708	4	-115	LOC_Os04g05960	retrotransposon protein, putative, Ty3-gypsy subclass
Leu	3	QEI_04_03199708	4	-110	LOC_Os04g05970	retrotransposon protein, putative, Ty3-gypsy subclass
Leu	3	QEI_04_03199708	4	-104	LOC_Os04g05980	transposon protein, putative, CACTA, En/Spm sub-class
Leu	3	QEI_04_03199708	4	-103	LOC_Os04g05990	transposon protein, putative, CACTA, En/Spm sub-class
Leu	3	QEI_04_03199708	4	-91	LOC_Os04g06000	transposon protein, putative, CACTA, En/Spm sub-class
Leu	3	QEI_04_03199708	4	-85	LOC_Os04g06010	transposon protein, putative, CACTA, En/Spm sub-class
Leu	3	QEI_04_03199708	4	-81	LOC_Os04g06020	transposon protein, putative, CACTA, En/Spm sub-class
Leu	3	QEI_04_03199708	4	-75	LOC_Os04g06030	transposon protein, putative, CACTA, En/Spm sub-class
Leu	3	QEI_04_03199708	4	-62	LOC_Os04g06050	conserved hypothetical protein
Leu	3	QEI_04_03199708	4	-46	LOC_Os04g06070	retrotransposon protein, putative, Ty3-gypsy subclass
Leu	3	QEI_04_03199708	4	-41	LOC_Os04g06080	retrotransposon protein, putative, Ty3-gypsy subclass
Leu	3	QEI_04_03199708	4	-37	LOC_Os04g06090	cysteine-rich receptor-like protein kinase 37 precursor, putative
Leu	3	QEI_04_03199708	4	-33	LOC_Os04g06100	transposon protein, putative, CACTA, En/Spm sub-class
Leu	3	QEI_04_03199708	4	-27	LOC_Os04g06110	retrotransposon protein, putative, Ty3-gypsy subclass
Leu	3	QEI_04_03199708	4	-21	LOC_Os04g06120	retrotransposon protein, putative, Ty3-gypsy subclass
Leu	3	QEI_04_03199708	4	-12	LOC_Os04g06130	retrotransposon protein, putative, Ty3-gypsy subclass
Leu	3	QEI_04_03199708	4	3	LOC_Os04g06160	retrotransposon protein, putative, Ty3-gypsy subclass
Leu	3	QEI_04_03199708	4	8	LOC_Os04g06170	conserved hypothetical protein
Leu	3	QEI_04_03199708	4	9	LOC_Os04g06180	transposon protein, putative, CACTA, En/Spm sub-class
Leu	3	QEI_04_03199708	4	12	LOC_Os04g06190	transposon protein, putative, CACTA, En/Spm sub-class
Leu	3	QEI_04_03199708	4	17	LOC_Os04g06200	transposon protein, putative, CACTA, En/Spm sub-class
Leu	3	QEI_04_03199708	4	18	LOC_Os04g06210	cysteine-rich receptor-like protein kinase 36 precursor, putative
Leu	3	QEI_04_03199708	4	21	LOC_Os04g06220	retrotransposon protein, putative, Ty1-copia subclass
Leu	3	QEI_04_03199708	4	28	LOC_Os04g06230	transposon protein, putative, CACTA, En/Spm sub-class
Leu	3	QEI_04_03199708	4	34	LOC_Os04g06244	kinase, putative
Leu	3	QEI_04_03199708	4	53	LOC_Os04g06260	transposon protein, putative, CACTA, En/Spm sub-class
Leu	3	QEI_04_03199708	4	58	LOC_Os04g06270	hypothetical protein
Leu	3	QEI_04_03199708	4	60	LOC_Os04g06280	conserved hypothetical protein
Leu	3	QEI_04_03199708	4	84	LOC_Os04g06290	retrotransposon protein, putative, unclassified
Leu	3	QEI_04_03199708	4	91	LOC_Os04g06300	expressed protein
Leu	3	QEI_04_03199708	4	99	LOC_Os04g06310	retrotransposon protein, putative, unclassified
Leu	3	QEI_04_03199708	4	102	LOC_Os04g06320	retrotransposon, putative, centromere-specific
Leu	3	QEI_04_03199708	4	105	LOC_Os04g06330	retrotransposon, putative, centromere-specific
Leu	3	QEI_04_03199708	4	106	LOC_Os04g06340	MEGL11 - Maternally expressed gene MEG family protein precursor
Leu	3	QEI_04_03199708	4	108	LOC_Os04g06350	conserved hypothetical protein
Leu	4	QEI_04_10816239	4	-104	LOC_Os04g19270	retrotransposon protein, putative, Ty3-gypsy subclass
Leu	4	QEI_04_10816239	4	-95	LOC_Os04g19280	retrotransposon protein, putative, unclassified
Leu	4	QEI_04_10816239	4	-89	LOC_Os04g19290	retrotransposon protein, putative, Ty3-gypsy subclass
Leu	4	QEI_04_10816239	4	-85	LOC_Os04g19300	retrotransposon protein, putative, Ty3-gypsy subclass
Leu	4	QEI_04_10816239	4	-78	LOC_Os04g19310	conserved hypothetical protein
Leu	4	QEI_04_10816239	4	-74	LOC_Os04g19320	retrotransposon protein, putative, unclassified
Leu	4	QEI_04_10816239	4	-71	LOC_Os04g19330	retrotransposon protein, putative, unclassified
Leu	4	QEI_04_10816239	4	-63	LOC_Os04g19340	retrotransposon protein, putative, unclassified
Leu	4	QEI_04_10816239	4	-55	LOC_Os04g19350	retrotransposon protein, putative, Ty3-gypsy subclass
Leu	4	QEI_04_10816239	4	-48	LOC_Os04g19360	retrotransposon protein, putative, Ty3-gypsy subclass
Leu	4	QEI_04_10816239	4	-38	LOC_Os04g19370	hypothetical protein
Leu	4	QEI_04_10816239	4	-32	LOC_Os04g19380	retrotransposon protein, putative, Ty1-copia subclass
Leu	4	QEI_04_10816239	4	-19	LOC_Os04g19390	retrotransposon protein, putative, unclassified
Leu	4	QEI_04_10816239	4	-14	LOC_Os04g19400	retrotransposon protein, putative, unclassified
Leu	4	QEI_04_10816239	4	-9	LOC_Os04g19410	retrotransposon protein, putative, unclassified
Leu	4	QEI_04_10816239	4	-3	LOC_Os04g19420	retrotransposon protein, putative, unclassified
Leu	4	QEI_04_10816239	4	0	LOC_Os04g19430	retrotransposon protein, putative, unclassified
Leu	4	QEI_04_10816239	4	7	LOC_Os04g19440	retrotransposon protein, putative, unclassified
Leu	4	QEI_04_10816239	4	13	LOC_Os04g19450	hypothetical protein
Leu	4	QEI_04_10816239	4	15	LOC_Os04g19460	hypothetical protein
Leu	4	QEI_04_10816239	4	19	LOC_Os04g19470	transposon protein, putative, CACTA, En/Spm sub-class
Leu	4	QEI_04_10816239	4	21	LOC_Os04g19480	retrotransposon protein, putative, Ty3-gypsy subclass
Leu	4	QEI_04_10816239	4	28	LOC_Os04g19490	retrotransposon protein, putative, unclassified
Leu	4	QEI_04_10816239	4	34	LOC_Os04g19500	retrotransposon protein, putative, unclassified
Leu	4	QEI_04_10816239	4	42	LOC_Os04g19510	retrotransposon protein, putative, unclassified
Leu	4	QEI_04_10816239	4	46	LOC_Os04g19520	retrotransposon protein, putative, Ty3-gypsy subclass
Leu	4	QEI_04_10816239	4	47	LOC_Os04g19530	retrotransposon protein, putative, unclassified
Leu	4	QEI_04_10816239	4	48	LOC_Os04g19540	retrotransposon protein, putative, Ty3-gypsy subclass
Leu	4	QEI_04_10816239	4	62	LOC_Os04g19550	transposon protein, putative, unclassified
Leu	4	QEI_04_10816239	4	64	LOC_Os04g19560	retrotransposon protein, putative, Ty3-gypsy subclass
Leu	4	QEI_04_10816239	4	66	LOC_Os04g19570	retrotransposon protein, putative, Ty3-gypsy subclass
Leu	4	QEI_04_10816239	4	73	LOC_Os04g19580	retrotransposon protein, putative, unclassified
Leu	4	QEI_04_10816239	4	79	LOC_Os04g19590	retrotransposon protein, putative, Ty3-gypsy subclass
Leu	4	QEI_04_10816239	4	94	LOC_Os04g19600	retrotransposon protein, putative, Ty3-gypsy subclass
Leu	4	QEI_04_10816239	4	95	LOC_Os04g19610	retrotransposon protein, putative, Ty3-gypsy subclass
Leu	4	QEI_04_10816239	4	102	LOC_Os04g19620	retrotransposon protein, putative, Ty3-gypsy subclass
Leu	4	QEI_04_10816239	4	113	LOC_Os04g19630	hypothetical protein
Leu	5	QEI_04_12566119	4	-117	LOC_Os04g22000	retrotransposon protein, putative, Ty3-gypsy subclass
Leu	5	QEI_04_12566119	4	-108	LOC_Os04g22010	retrotransposon protein, putative, Ty3-gypsy subclass
Leu	5	QEI_04_12566119	4	-101	LOC_Os04g22020	retrotransposon protein, putative, unclassified
Leu	5	QEI_04_12566119	4	-94	LOC_Os04g22030	retrotransposon protein, putative, Ty3-gypsy subclass
Leu	5	QEI_04_12566119	4	-93	LOC_Os04g22040	hypothetical protein
Leu	5	QEI_04_12566119	4	-89	LOC_Os04g22050	retrotransposon protein, putative, unclassified
Leu	5	QEI_04_12566119	4	-80	LOC_Os04g22060	retrotransposon protein, putative, unclassified, expressed
Leu	5	QEI_04_12566119	4	-78	LOC_Os04g22070	hypothetical protein
Leu	5	QEI_04_12566119	4	-70	LOC_Os04g22080	retrotransposon protein, putative, unclassified
Leu	5	QEI_04_12566119	4	-62	LOC_Os04g22090	NB-ARC domain containing protein, expressed
Leu	5	QEI_04_12566119	4	-54	LOC_Os04g22100	BED zinc finger family protein, expressed
Leu	5	QEI_04_12566119	4	-43	LOC_Os04g22110	retrotransposon protein, putative, unclassified
Leu	5	QEI_04_12566119	4	-35	LOC_Os04g22120	protein kinase, putative, expressed
Leu	5	QEI_04_12566119	4	-29	LOC_Os04g22130	conserved hypothetical protein
Leu	5	QEI_04_12566119	4	-28	LOC_Os04g22140	hypothetical protein
Leu	5	QEI_04_12566119	4	-24	LOC_Os04g22150	hypothetical protein
Leu	5	QEI_04_12566119	4	-19	LOC_Os04g22160	transposon protein, putative, CACTA, En/Spm sub-class
Leu	5	QEI_04_12566119	4	-15	LOC_Os04g22170	transposon protein, putative, CACTA, En/Spm sub-class
Leu	5	QEI_04_12566119	4	-13	LOC_Os04g22180	hypothetical protein
[truncated: 2,453 more rows]

## Sheet: Supplementary Table 7
Supplementary Table 7 | NPQTL and five FAA content of each accession.
[truncated: 449 more rows]
